# Supplementary material for: Distribution network optimization: predicting computation times to design scenario analysis for network operators
Source: Springer Nature journal article supplement (doi:10.1007/s12667-023-00572-5), 2023-03-14
Supplement: MOESM1 [file 24625448]

## Appendix A Calculation of Transformer Conversion Rates

A transformer is a passive electrical device that transforms the voltage level from the medium-voltage network to the low-voltage network and vice versa. The voltage is changed in a fixed ratio by electrical induction, while the current behaves antiproportionally. In an ideal transformer, the power is transformed without loss, whereas in reality there is a power loss due to transformer impedance. [24, pp.2-4].

The relationship between the nominal voltage level  $vl_i$  of a bus  $i$  and the nominal voltage level  $vl_j$  of a second node  $j$  is expressed as a parameter  $\eta_{ij} = \frac{vl_i}{vl_j} * loss$ . With *loss*, we summarize negative influences by various effects such as core losses and non-zero resistances needs to be considered [24, pp.4-10]. For simplification, we assume losses of 2% ( $loss = 0.02$ ) for transformers.

The outgoing current can be estimated by multiplying the incoming current by the factor  $\eta_{ij}$ . As an example, Figure A1 shows a 20/0.4 kV transformer type with  $vl_i = 20$  kV,  $vl_j = 0.4$  kV and  $loss = 0.02$ , such that  $\eta_{ij} = \frac{20}{40} 0.02 = 49$ . With an exemplary current input of 5 ampere, which corresponds to 100 kW at 20 kV, this and leads to an output of 98 kW with 245 ampere at 0.4 kV.

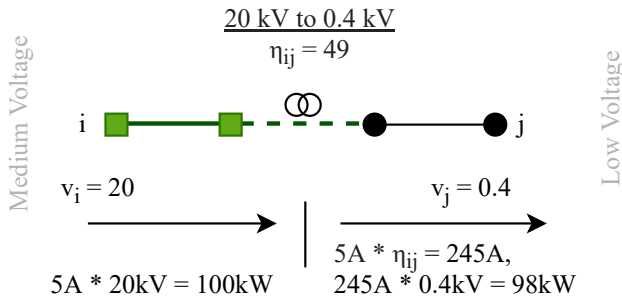

**Fig. A1:** Conversion of power at a transformer

For a certain transformer type, a technician can add or remove windings to decrease or increase the voltage transformation. The number of  $tap_q^{\min}$  and  $tap_q^{\max}$  indicate the number of tap steps that a transformer type  $q$  can use. With each tap step the voltage changes by the relative value  $tap_q^{\text{step}}$ . In combination with the reciprocal of  $\eta_q$ , we can define a lower and upper bound for the relative voltage output of transformer  $q$  as stated in Equation A1.

$$l_q^\theta = \eta_q^{-1} \left( 1 - \frac{tap_q^{\min} tap_q^{\text{step}}}{100} \right), \quad u_q^\theta = \eta_q^{-1} \left( 1 + \frac{tap_q^{\max} tap_q^{\text{step}}}{100} \right) \quad (\text{A1})$$

## Appendix B Voltage Loss Calculation

This section describes the voltage behavior in lines and transformers in more detail. The voltage drop of a line between two nodes  $i$  and  $j$  is calculated using the *DIN VDE 0100–520:2012–06 Appendix G*, a standard developed by the German Institute for Standardization and the German Association for Electrical, Electronic & Information Technologies. For three-phase line type  $q$ , the voltage drop  $\Delta_{ijq}$  between two nodes  $i$  and  $j$  is defined in Equation B2. The voltage drop depends on the distance  $\delta_{ij}$  between  $i$  and  $j$  as well as the resistance  $res_q$  and reactance  $rea_q$  of  $q$ , which are multiplied by the power factors  $\cos\varphi_q$  and  $\sin\varphi_q$  respectively.

$$\Delta_{ijq} = \delta_{ij} (res_q \cos\varphi_q + rea_q \sin\varphi_q) \quad (\text{B2})$$

The calculated value indicates the voltage loss per meter and per ampere of current flow. As an example, the voltage drop of a line from node  $i$  to  $j$  with

line type  $q$ ,  $\Delta_{ijq} = 0.00002128$ , a distance  $\delta_{ij} = 500$  meters and a current flow of  $f_{ij} = 100$  amperes is  $0.00002128 * 500 * 100 = 1.064$  volts.

## Appendix C Correspondence between network parameters and model parameters

This section describes the relationship between parameters of the distribution network (*network parameters*) and those of the mathematical model (*model parameters*). The model parameters are shown in Table 3. Table 5 introduces the network parameters. As described in Section 5.1, real world line and transformer types are taken for edge qualifications  $Q$  for the mathematical model. The mathematical model distinguishes edge qualifications for transformers  $Q_\tau$  and lines  $Q_\lambda$ .

The transformer types and the associated model parameters are presented in Table C1. The cost include the material value, acquisition of land, installation and maintenance. The transformer types are standard transformers for transforming voltage from 20 kV to 0.4 kV.

**Table C1:** Transformer types available for each instance

| Id | Cost      | MVA capacity        | Conversion rate |              |             | Max. Current |
|----|-----------|---------------------|-----------------|--------------|-------------|--------------|
|    | $c_{ijq}$ |                     | $l_q^\theta$    | $u_q^\theta$ | $\eta_{ij}$ | $u_q^c$      |
| 1  | 39,000.00 | 0.40 MVA            | 0.0194          | 0.0206       | 49          | 577.350      |
| 2  | 58,500.00 | 0.63 MVA            | 0.0194          | 0.0206       | 49          | 909.327      |
| 3  | 32,500.00 | 0.25 MVA            | 0.0194          | 0.0206       | 49          | 360.844      |
| 4  | 78,000.00 | 2x0.4 MVA           | 0.0194          | 0.0206       | 49          | 1154.700     |
| 5  | 0.00      | No transformer type |                 |              |             |              |

$$q \in Q, \quad i, j \in \{(i, j) | (i, j) \in E\}$$

The selection of line types is presented in Table C2. The line types are NAYY-lines with four cores, each with a cross-section of 120, 150 or 240 mm<sup>2</sup>.

The data given are from assumptions made in consultation with a distribution network operator. The cost include the material value, acquisition and installation. The voltage loss results from the resistance and reactance as well as the power factors  $\cos(\varphi)$  and  $\sin(\varphi)$  as described in Appendix B.

**Table C2:** Line types available for each instance

| Id | Cost $c_{ijq}^*$           | Diameter              | Voltage drop $\Delta_{ijq}^*$           | Max current $u_q^c$ |
|----|----------------------------|-----------------------|-----------------------------------------|---------------------|
| 1  | $223.47 \cdot \delta_{ij}$ | 150 mm <sup>2</sup>   | $2.128 \cdot 10^{-7} \cdot \delta_{ij}$ | 284                 |
| 2  | $235.17 \cdot \delta_{ij}$ | 240 mm <sup>2</sup>   | $1.480 \cdot 10^{-7} \cdot \delta_{ij}$ | 375                 |
| 3  | $211.77 \cdot \delta_{ij}$ | 120 mm <sup>2</sup>   | $2.504 \cdot 10^{-7} \cdot \delta_{ij}$ | 253                 |
| 4  | $446.94 \cdot \delta_{ij}$ | 2x150 mm <sup>2</sup> | $2.128 \cdot 10^{-7} \cdot \delta_{ij}$ | 568                 |
| 5  | 0.00                       | No line type          |                                         |                     |

$$q \in Q, \quad i, j \in \{(i, j) | (i, j) \in E\}$$

\* The network parameter  $\delta_{ij}$  describes the distance from node  $i$  to node  $j$  in meter. The distance results from the topology of the city network  $cn$ , see Section 5.1.1

In an instance, the number of available types for transformer and lines may be limited to two or three different types. In this case, the first two or respectively three listed types of Table C1 and Table C2 are available. In addition, there is always the possibility of not installing any transformer or line type on an edge (Id 5). This option is free of charge, but consequently no power can be transported via the edge.

## Appendix D Regression Results

In addition to the OLS regression results presented in Section 5.3, we refine the sensitivity analysis and group the instances according to the distribution density of transformers  $tr$ . The regression model shown in Equation (D3) further accounts for the other independent variables presented in Equation (17). Again, only the optimally solved instances are used and outliers are removed to prevent distortion of the analysis. Table D3 presents the results of the regression.

$$\ln(time) = \beta_0 + \beta_1 \cdot bu + \beta_2 \cdot \frac{nl}{bu} + \beta_3 \cdot \frac{td}{bu} + \beta_4 \cdot lt + \beta_5 \cdot as + \varepsilon \quad (D3)$$

**Table D3:** OLS regression results for execution time

|                     | Effect                     |                 | coef             | std err              | t       | P >  t   |
|---------------------|----------------------------|-----------------|------------------|----------------------|---------|----------|
| $tr < 0.9$          | const                      |                 | -17.4866         | 2.332                | -7.498  | < 0.0001 |
|                     | Buses                      | $bu$            | 0.0017           | $5.31 \cdot 10^{-5}$ | 31.916  | < 0.0001 |
|                     | Lines per Bus              | $\frac{nl}{bu}$ | 15.9223          | 2.122                | 7.502   | < 0.0001 |
|                     | Load per Bus               | $\frac{td}{bu}$ | 0.5214           | 0.202                | 2.578   | 0.010    |
|                     | Line and transformer types | $lt$            | 0.2210           | 0.028                | 7.788   | < 0.0001 |
|                     | Action Scope               | $as$            | 1.0392           | 0.770                | 1.349   | 0.178    |
|                     | <hr/>                      |                 |                  |                      |         |          |
|                     | N: 1066                    |                 | R-squared: 0.711 |                      |         |          |
| $0.9 < tr \leq 1.1$ | const                      |                 | -15.0023         | 2.051                | -7.315  | < 0.0001 |
|                     | Buses                      | $bu$            | 0.0017           | $4.36 \cdot 10^{-5}$ | 39.943  | < 0.0001 |
|                     | Lines per Bus              | $\frac{nl}{bu}$ | 14.0527          | 1.855                | 7.577   | < 0.0001 |
|                     | Load per Bus               | $\frac{td}{bu}$ | 0.2804           | 0.171                | 1.642   | 0.101    |
|                     | Line and transformer types | $lt$            | 0.1340           | 0.025                | 5.419   | < 0.0001 |
|                     | Action Scope               | $as$            | 1.1567           | 0.685                | 1.688   | 0.092    |
|                     | <hr/>                      |                 |                  |                      |         |          |
|                     | N: 1138                    |                 | R-squared: 0.771 |                      |         |          |
| $1.1 < tr$          | const                      |                 | -17.5841         | 1.401                | -12.554 | < 0.0001 |
|                     | Buses                      | $bu$            | 0.0017           | $2.78 \cdot 10^{-5}$ | 60.737  | < 0.0001 |
|                     | Lines per Bus              | $\frac{nl}{bu}$ | 16.2187          | 1.266                | 12.809  | < 0.0001 |
|                     | Load per Bus               | $\frac{td}{bu}$ | 0.0500           | 0.129                | 0.389   | 0.697    |
|                     | Line and transformer types | $lt$            | 0.0853           | 0.018                | 4.708   | < 0.0001 |
|                     | Action Scope               | $as$            | 3.7135           | 0.499                | 7.449   | < 0.0001 |
|                     | <hr/>                      |                 |                  |                      |         |          |
|                     | N: 1258                    |                 | R-squared: 0.840 |                      |         |          |

## Appendix E List of Results

**Table E4:** List of small instances for computational experiments with a total demand in kW

| #  | <i>cn</i> | Network characteristics |                 |           |           |           |           |           | Solution |      | Simulation |        |
|----|-----------|-------------------------|-----------------|-----------|-----------|-----------|-----------|-----------|----------|------|------------|--------|
|    |           | <i>bu</i>               | $\frac{nl}{bu}$ | <i>lf</i> | <i>tr</i> | <i>lt</i> | <i>tt</i> | <i>as</i> | Time     | Gap  | Volt       | Ampere |
| 1  | Münster   | 1000                    | 1.046           | 0.83      | 1.0       | 2         | 2         | 0.51      | 0:00:06  | 0.0  | y          | y      |
| 2  | Paderborn | 1000                    | 1.049           | 0.83      | 1.0       | 2         | 2         | 0.48      | 0:00:04  | 0.0  | y          | y      |
| 3  | Detmold   | 1000                    | 1.040           | 0.83      | 1.0       | 2         | 2         | 0.35      | 0:00:07  | 0.0  | y          | y      |
| 4  | Bielefeld | 1000                    | 1.039           | 0.83      | 1.0       | 2         | 2         | 0.35      | 0:00:07  | 0.0  | y          | y      |
| 5  | Gütersloh | 1000                    | 1.067           | 0.83      | 1.0       | 2         | 2         | 0.43      | 0:00:05  | 0.0  | y          | y      |
| 6  | Soest     | 1000                    | 1.038           | 0.83      | 1.0       | 2         | 2         | 0.46      | 0:00:04  | 0.0  | y          | y      |
| 7  | Dortmund  | 1000                    | 1.054           | 0.83      | 1.0       | 2         | 2         | 0.46      | 0:00:04  | 0.0  | y          | y      |
| 8  | Kassel    | 1000                    | 1.045           | 0.83      | 1.0       | 2         | 2         | 0.29      | 0:00:05  | 0.0  | y          | y      |
| 9  | Hannover  | 1000                    | 1.062           | 0.83      | 1.0       | 2         | 2         | 0.46      | 0:00:04  | 0.0  | y          | y      |
| 10 | Krefeld   | 1000                    | 1.090           | 0.83      | 1.0       | 2         | 2         | 0.48      | 0:00:08  | 0.0  | y          | y      |
| 11 | Münster   | 1000                    | 1.046           | 0.83      | 1.0       | 2         | 2         | 0.53      | 0:00:07  | 0.0  | y          | y      |
| 12 | Paderborn | 1000                    | 1.050           | 0.83      | 1.0       | 2         | 2         | 0.36      | 0:00:12  | 0.0  | y          | y      |
| 13 | Detmold   | 1000                    | 1.040           | 0.83      | 1.0       | 2         | 2         | 0.44      | 0:00:05  | 0.0  | y          | y      |
| 14 | Bielefeld | 1000                    | 1.038           | 0.83      | 1.0       | 2         | 2         | 0.5       | 0:00:14  | 0.0  | y          | y      |
| 15 | Gütersloh | 1000                    | 1.067           | 0.83      | 1.0       | 2         | 2         | 0.45      | 0:00:08  | 0.0  | y          | y      |
| 16 | Soest     | 1000                    | 1.038           | 0.83      | 1.0       | 2         | 2         | 0.47      | 0:00:04  | 0.49 | y          | y      |
| 17 | Dortmund  | 1000                    | 1.054           | 0.83      | 1.0       | 2         | 2         | 0.5       | 0:00:05  | 0.0  | y          | y      |
| 18 | Kassel    | 1000                    | 1.045           | 0.83      | 1.0       | 2         | 2         | 0.51      | 0:00:06  | 0.0  | y          | y      |
| 19 | Hannover  | 1000                    | 1.064           | 0.83      | 1.0       | 2         | 2         | 0.48      | 0:00:05  | 0.0  | y          | y      |
| 20 | Krefeld   | 1000                    | 1.089           | 0.83      | 1.0       | 2         | 2         | 0.43      | 0:00:10  | 0.0  | y          | y      |
| 21 | Münster   | 1000                    | 1.046           | 0.83      | 1.0       | 2         | 2         | 0.61      | 0:00:06  | 0.0  | y          | y      |
| 22 | Paderborn | 1000                    | 1.050           | 0.83      | 1.0       | 2         | 2         | 0.47      | 0:00:27  | 0.0  | y          | y      |
| 23 | Detmold   | 1000                    | 1.040           | 0.83      | 1.0       | 2         | 2         | 0.46      | 0:00:11  | 0.0  | y          | y      |
| 24 | Bielefeld | 1000                    | 1.039           | 0.83      | 1.0       | 2         | 2         | 0.48      | 0:00:12  | 0.0  | y          | y      |
| 25 | Gütersloh | 1000                    | 1.067           | 0.83      | 1.0       | 2         | 2         | 0.52      | 0:01:02  | 0.0  | y          | y      |
| 26 | Soest     | 1000                    | 1.038           | 0.83      | 1.0       | 2         | 2         | 0.49      | 0:00:09  | 0.0  | y          | y      |
| 27 | Dortmund  | 1000                    | 1.054           | 0.83      | 1.0       | 2         | 2         | 0.52      | 0:00:11  | 0.0  | y          | y      |
| 28 | Kassel    | 1000                    | 1.045           | 0.83      | 1.0       | 2         | 2         | 0.45      | 0:00:14  | 0.0  | y          | y      |
| 29 | Hannover  | 1000                    | 1.064           | 0.83      | 1.0       | 2         | 2         | 0.49      | 0:00:09  | 0.0  | y          | y      |
| 30 | Krefeld   | 1000                    | 1.089           | 0.83      | 1.0       | 2         | 2         | 0.44      | 0:00:28  | 0.0  | y          | y      |
| 31 | Münster   | 1000                    | 1.045           | 0.83      | 1.0       | 3         | 3         | 0.56      | 0:00:06  | 0.0  | y          | y      |
| 32 | Paderborn | 1000                    | 1.050           | 0.83      | 1.0       | 3         | 3         | 0.42      | 0:00:09  | 0.0  | y          | y      |
| 33 | Detmold   | 1000                    | 1.040           | 0.83      | 1.0       | 3         | 3         | 0.39      | 0:00:06  | 0.0  | y          | y      |
| 34 | Bielefeld | 1000                    | 1.039           | 0.83      | 1.0       | 3         | 3         | 0.39      | 0:00:07  | 0.0  | y          | y      |
| 35 | Gütersloh | 1000                    | 1.067           | 0.83      | 1.0       | 3         | 3         | 0.46      | 0:00:25  | 0.0  | y          | y      |
| 36 | Soest     | 1000                    | 1.038           | 0.83      | 1.0       | 3         | 3         | 0.49      | 0:00:06  | 0.0  | y          | y      |
| 37 | Dortmund  | 1000                    | 1.054           | 0.83      | 1.0       | 3         | 3         | 0.49      | 0:00:08  | 0.0  | y          | y      |

| #  | <i>cn</i> | Network characteristics |                 |           |           |           |           |           | Solution |      | Simulation |        |
|----|-----------|-------------------------|-----------------|-----------|-----------|-----------|-----------|-----------|----------|------|------------|--------|
|    |           | <i>bu</i>               | $\frac{nl}{bu}$ | <i>lf</i> | <i>tr</i> | <i>lt</i> | <i>tt</i> | <i>as</i> | Time     | Gap  | Volt       | Ampere |
| 38 | Kassel    | 1000                    | 1.045           | 0.83      | 1.0       | 3         | 3         | 0.38      | 0:00:06  | 0.0  | y          | y      |
| 39 | Hannover  | 1000                    | 1.064           | 0.83      | 1.0       | 3         | 3         | 0.5       | 0:00:05  | 0.0  | y          | y      |
| 40 | Krefeld   | 1000                    | 1.089           | 0.83      | 1.0       | 3         | 3         | 0.36      | 0:00:16  | 0.0  | y          | y      |
| 41 | Münster   | 1000                    | 1.046           | 0.83      | 1.0       | 3         | 3         | 0.56      | 0:00:07  | 0.0  | y          | y      |
| 42 | Paderborn | 1000                    | 1.050           | 0.83      | 1.0       | 3         | 3         | 0.39      | 0:00:12  | 0.0  | y          | y      |
| 43 | Detmold   | 1000                    | 1.040           | 0.83      | 1.0       | 3         | 3         | 0.48      | 0:00:14  | 0.0  | y          | y      |
| 44 | Bielefeld | 1000                    | 1.038           | 0.83      | 1.0       | 3         | 3         | 0.54      | 0:00:05  | 0.39 | y          | y      |
| 45 | Gütersloh | 1000                    | 1.067           | 0.83      | 1.0       | 3         | 3         | 0.44      | 0:00:08  | 0.0  | y          | y      |
| 46 | Soest     | 1000                    | 1.038           | 0.83      | 1.0       | 3         | 3         | 0.5       | 0:00:06  | 0.0  | y          | y      |
| 47 | Dortmund  | 1000                    | 1.054           | 0.83      | 1.0       | 3         | 3         | 0.54      | 0:00:10  | 0.0  | y          | y      |
| 48 | Kassel    | 1000                    | 1.045           | 0.83      | 1.0       | 3         | 3         | 0.55      | 0:00:09  | 0.0  | y          | y      |
| 49 | Hannover  | 1000                    | 1.064           | 0.83      | 1.0       | 3         | 3         | 0.47      | 0:00:30  | 0.0  | y          | y      |
| 50 | Krefeld   | 1000                    | 1.089           | 0.83      | 1.0       | 3         | 3         | 0.44      | 0:00:11  | 0.0  | y          | y      |
| 51 | Münster   | 1000                    | 1.046           | 0.83      | 1.0       | 3         | 3         | 0.64      | 0:00:09  | 0.0  | y          | y      |
| 52 | Paderborn | 1000                    | 1.050           | 0.83      | 1.0       | 3         | 3         | 0.5       | 0:00:19  | 0.0  | y          | y      |
| 53 | Detmold   | 1000                    | 1.040           | 0.83      | 1.0       | 3         | 3         | 0.5       | 0:00:06  | 0.0  | y          | y      |
| 54 | Bielefeld | 1000                    | 1.038           | 0.83      | 1.0       | 3         | 3         | 0.53      | 0:00:20  | 0.0  | y          | y      |
| 55 | Gütersloh | 1000                    | 1.067           | 0.83      | 1.0       | 3         | 3         | 0.55      | 0:00:20  | 0.0  | y          | y      |
| 56 | Soest     | 1000                    | 1.038           | 0.83      | 1.0       | 3         | 3         | 0.52      | 0:00:07  | 0.23 | y          | y      |
| 57 | Dortmund  | 1000                    | 1.054           | 0.83      | 1.0       | 3         | 3         | 0.56      | 0:00:08  | 0.0  | y          | y      |
| 58 | Kassel    | 1000                    | 1.045           | 0.83      | 1.0       | 3         | 3         | 0.48      | 0:00:08  | 0.0  | y          | y      |
| 59 | Hannover  | 1000                    | 1.064           | 0.83      | 1.0       | 3         | 3         | 0.52      | 0:00:09  | 0.0  | y          | y      |
| 60 | Krefeld   | 1000                    | 1.089           | 0.83      | 1.0       | 3         | 3         | 0.48      | 0:02:26  | 0.0  | y          | y      |
| 61 | Münster   | 1000                    | 1.046           | 0.83      | 1.0       | 4         | 4         | 0.55      | 0:00:05  | 0.0  | y          | y      |
| 62 | Paderborn | 1000                    | 1.050           | 0.83      | 1.0       | 4         | 4         | 0.44      | 0:00:08  | 0.0  | y          | y      |
| 63 | Detmold   | 1000                    | 1.040           | 0.83      | 1.0       | 4         | 4         | 0.42      | 0:00:09  | 0.0  | y          | y      |
| 64 | Bielefeld | 1000                    | 1.038           | 0.83      | 1.0       | 4         | 4         | 0.51      | 0:00:08  | 0.0  | y          | y      |
| 65 | Gütersloh | 1000                    | 1.067           | 0.83      | 1.0       | 4         | 4         | 0.42      | 0:00:09  | 0.0  | y          | y      |
| 66 | Soest     | 1000                    | 1.040           | 0.83      | 1.0       | 4         | 4         | 0.38      | 0:00:21  | 0.0  | y          | y      |
| 67 | Dortmund  | 1000                    | 1.054           | 0.83      | 1.0       | 4         | 4         | 0.52      | 0:00:13  | 0.0  | y          | y      |
| 68 | Kassel    | 1000                    | 1.045           | 0.83      | 1.0       | 4         | 4         | 0.35      | 0:00:10  | 0.0  | y          | y      |
| 69 | Hannover  | 1000                    | 1.064           | 0.83      | 1.0       | 4         | 4         | 0.52      | 0:00:05  | 0.0  | y          | y      |
| 70 | Krefeld   | 1000                    | 1.089           | 0.83      | 1.0       | 4         | 4         | 0.39      | 0:00:11  | 0.0  | y          | y      |
| 71 | Münster   | 1000                    | 1.046           | 0.83      | 1.0       | 4         | 4         | 0.59      | 0:00:08  | 0.0  | y          | y      |
| 72 | Paderborn | 1000                    | 1.050           | 0.83      | 1.0       | 4         | 4         | 0.42      | 0:00:42  | 0.0  | y          | y      |
| 73 | Detmold   | 1000                    | 1.040           | 0.83      | 1.0       | 4         | 4         | 0.5       | 0:00:30  | 0.0  | y          | y      |
| 74 | Bielefeld | 1000                    | 1.039           | 0.83      | 1.0       | 4         | 4         | 0.48      | 0:00:10  | 0.0  | y          | y      |
| 75 | Gütersloh | 1000                    | 1.067           | 0.83      | 1.0       | 4         | 4         | 0.51      | 0:00:11  | 0.0  | y          | y      |
| 76 | Soest     | 1000                    | 1.040           | 0.83      | 1.0       | 4         | 4         | 0.43      | 0:00:05  | 0.0  | y          | y      |
| 77 | Dortmund  | 1000                    | 1.054           | 0.83      | 1.0       | 4         | 4         | 0.56      | 0:00:10  | 0.0  | y          | y      |
| 78 | Kassel    | 1000                    | 1.045           | 0.83      | 1.0       | 4         | 4         | 0.48      | 0:00:14  | 0.0  | y          | y      |
| 79 | Hannover  | 1000                    | 1.064           | 0.83      | 1.0       | 4         | 4         | 0.54      | 0:00:11  | 0.0  | y          | y      |
| 80 | Krefeld   | 1000                    | 1.089           | 0.83      | 1.0       | 4         | 4         | 0.46      | 0:00:16  | 0.0  | y          | y      |
| 81 | Münster   | 1000                    | 1.046           | 0.83      | 1.0       | 4         | 4         | 0.67      | 0:00:08  | 0.0  | y          | y      |
| 82 | Paderborn | 1000                    | 1.050           | 0.83      | 1.0       | 4         | 4         | 0.53      | 0:00:14  | 0.0  | y          | y      |
| 83 | Detmold   | 1000                    | 1.040           | 0.83      | 1.0       | 4         | 4         | 0.52      | 0:00:06  | 0.0  | y          | y      |
| 84 | Bielefeld | 1000                    | 1.038           | 0.83      | 1.0       | 4         | 4         | 0.56      | 0:00:09  | 0.0  | y          | y      |
| 85 | Gütersloh | 1000                    | 1.067           | 0.83      | 1.0       | 4         | 4         | 0.58      | 0:00:23  | 0.0  | y          | y      |
| 86 | Soest     | 1000                    | 1.038           | 0.83      | 1.0       | 4         | 4         | 0.55      | 0:00:13  | 0.0  | y          | y      |
| 87 | Dortmund  | 1000                    | 1.054           | 0.83      | 1.0       | 4         | 4         | 0.58      | 0:00:23  | 0.0  | y          | y      |
| 88 | Kassel    | 1000                    | 1.045           | 0.83      | 1.0       | 4         | 4         | 0.5       | 0:00:19  | 0.0  | y          | y      |
| 89 | Hannover  | 1000                    | 1.064           | 0.83      | 1.0       | 4         | 4         | 0.54      | 0:00:11  | 0.0  | y          | y      |

| #   | <i>cn</i> | Network characteristics |                 |           |           |           |           |           | Solution |      | Simulation |        |
|-----|-----------|-------------------------|-----------------|-----------|-----------|-----------|-----------|-----------|----------|------|------------|--------|
|     |           | <i>bu</i>               | $\frac{nl}{bu}$ | <i>lf</i> | <i>tr</i> | <i>lt</i> | <i>tt</i> | <i>as</i> | Time     | Gap  | Volt       | Ampere |
| 90  | Krefeld   | 1000                    | 1.089           | 0.83      | 1.0       | 4         | 4         | 0.5       | 0:00:19  | 0.0  | y          | y      |
| 91  | Münster   | 1000                    | 1.045           | 1.34      | 1.0       | 2         | 2         | 0.54      | 0:00:04  | 0.0  | y          | y      |
| 92  | Paderborn | 1000                    | 1.049           | 1.34      | 1.0       | 2         | 2         | 0.48      | 0:00:06  | 0.0  | y          | y      |
| 93  | Detmold   | 1000                    | 1.040           | 1.34      | 1.0       | 2         | 2         | 0.35      | 0:00:08  | 0.0  | y          | y      |
| 94  | Bielefeld | 1000                    | 1.038           | 1.34      | 1.0       | 2         | 2         | 0.42      | 0:00:04  | 0.0  | y          | y      |
| 95  | Gütersloh | 1000                    | 1.067           | 1.34      | 1.0       | 2         | 2         | 0.43      | 0:00:09  | 0.0  | y          | y      |
| 96  | Soest     | 1000                    | 1.038           | 1.34      | 1.0       | 2         | 2         | 0.46      | 0:00:03  | 0.0  | y          | y      |
| 97  | Dortmund  | 1000                    | 1.054           | 1.34      | 1.0       | 2         | 2         | 0.46      | 0:00:06  | 0.0  | y          | y      |
| 98  | Kassel    | 1000                    | 1.045           | 1.34      | 1.0       | 2         | 2         | 0.29      | 0:00:06  | 0.0  | y          | y      |
| 99  | Hannover  | 1000                    | 1.064           | 1.34      | 1.0       | 2         | 2         | 0.47      | 0:00:08  | 0.0  | y          | y      |
| 100 | Krefeld   | 1000                    | 1.089           | 1.34      | 1.0       | 2         | 2         | 0.32      | 0:00:13  | 0.0  | y          | y      |
| 101 | Münster   | 1000                    | 1.046           | 1.34      | 1.0       | 2         | 2         | 0.53      | 0:00:06  | 0.0  | y          | y      |
| 102 | Paderborn | 1000                    | 1.050           | 1.34      | 1.0       | 2         | 2         | 0.36      | 0:00:26  | 0.0  | n          | y      |
| 103 | Detmold   | 1000                    | 1.040           | 1.34      | 1.0       | 2         | 2         | 0.44      | 0:00:09  | 0.0  | y          | y      |
| 104 | Bielefeld | 1000                    | 1.038           | 1.34      | 1.0       | 2         | 2         | 0.5       | 0:00:11  | 0.0  | y          | y      |
| 105 | Gütersloh | 1000                    | 1.067           | 1.34      | 1.0       | 2         | 2         | 0.4       | 0:00:10  | 0.0  | y          | y      |
| 106 | Soest     | 1000                    | 1.038           | 1.34      | 1.0       | 2         | 2         | 0.47      | 0:00:10  | 0.0  | y          | y      |
| 107 | Dortmund  | 1000                    | 1.054           | 1.34      | 1.0       | 2         | 2         | 0.5       | 0:00:08  | 0.0  | y          | y      |
| 108 | Kassel    | 1000                    | 1.045           | 1.34      | 1.0       | 2         | 2         | 0.42      | 0:00:17  | 0.0  | y          | y      |
| 109 | Hannover  | 1000                    | 1.064           | 1.34      | 1.0       | 2         | 2         | 0.43      | 0:02:48  | 0.08 | y          | y      |
| 110 | Krefeld   | 1000                    | 1.089           | 1.34      | 1.0       | 2         | 2         | 0.4       | 0:00:08  | 0.0  | y          | y      |
| 111 | Münster   | 1000                    | 1.046           | 1.34      | 1.0       | 2         | 2         | 0.61      | 0:00:10  | 0.0  | y          | y      |
| 112 | Paderborn | 1000                    | 1.050           | 1.34      | 1.0       | 2         | 2         | 0.47      | 0:00:37  | 0.0  | n          | y      |
| 113 | Detmold   | 1000                    | 1.040           | 1.34      | 1.0       | 2         | 2         | 0.46      | 0:00:06  | 0.0  | y          | y      |
| 114 | Bielefeld | 1000                    | 1.038           | 1.34      | 1.0       | 2         | 2         | 0.5       | 0:00:26  | 0.34 | y          | y      |
| 115 | Gütersloh | 1000                    | 1.067           | 1.34      | 1.0       | 2         | 2         | 0.43      | 0:00:20  | 0.0  | y          | y      |
| 116 | Soest     | 1000                    | 1.038           | 1.34      | 1.0       | 2         | 2         | 0.49      | 0:00:08  | 0.0  | y          | y      |
| 117 | Dortmund  | 1000                    | 1.054           | 1.34      | 1.0       | 2         | 2         | 0.52      | 0:00:11  | 0.0  | y          | y      |
| 118 | Kassel    | 1000                    | 1.045           | 1.34      | 1.0       | 2         | 2         | 0.5       | 0:00:10  | 0.0  | y          | y      |
| 119 | Hannover  | 1000                    | 1.064           | 1.34      | 1.0       | 2         | 2         | 0.48      | 0:00:11  | 0.0  | y          | y      |
| 120 | Krefeld   | 1000                    | 1.089           | 1.34      | 1.0       | 2         | 2         | 0.44      | 0:00:48  | 0.0  | y          | y      |
| 121 | Münster   | 1000                    | 1.046           | 1.34      | 1.0       | 3         | 3         | 0.54      | 0:00:08  | 0.0  | y          | y      |
| 122 | Paderborn | 1000                    | 1.050           | 1.34      | 1.0       | 3         | 3         | 0.42      | 0:00:11  | 0.0  | y          | y      |
| 123 | Detmold   | 1000                    | 1.040           | 1.34      | 1.0       | 3         | 3         | 0.39      | 0:00:08  | 0.0  | y          | y      |
| 124 | Bielefeld | 1000                    | 1.038           | 1.34      | 1.0       | 3         | 3         | 0.45      | 0:00:06  | 0.0  | y          | y      |
| 125 | Gütersloh | 1000                    | 1.067           | 1.34      | 1.0       | 3         | 3         | 0.43      | 0:00:08  | 0.0  | y          | y      |
| 126 | Soest     | 1000                    | 1.039           | 1.34      | 1.0       | 3         | 3         | 0.51      | 0:00:05  | 0.0  | y          | y      |
| 127 | Dortmund  | 1000                    | 1.054           | 1.34      | 1.0       | 3         | 3         | 0.49      | 0:00:15  | 0.0  | y          | y      |
| 128 | Kassel    | 1000                    | 1.045           | 1.34      | 1.0       | 3         | 3         | 0.55      | 0:00:05  | 0.0  | y          | y      |
| 129 | Hannover  | 1000                    | 1.064           | 1.34      | 1.0       | 3         | 3         | 0.5       | 0:00:11  | 0.0  | y          | y      |
| 130 | Krefeld   | 1000                    | 1.089           | 1.34      | 1.0       | 3         | 3         | 0.36      | 0:00:10  | 0.0  | y          | y      |
| 131 | Münster   | 1000                    | 1.046           | 1.34      | 1.0       | 3         | 3         | 0.56      | 0:00:10  | 0.0  | y          | y      |
| 132 | Paderborn | 1000                    | 1.050           | 1.34      | 1.0       | 3         | 3         | 0.39      | 0:00:22  | 0.0  | n          | y      |
| 133 | Detmold   | 1000                    | 1.040           | 1.34      | 1.0       | 3         | 3         | 0.48      | 0:00:06  | 0.0  | y          | y      |
| 134 | Bielefeld | 1000                    | 1.038           | 1.34      | 1.0       | 3         | 3         | 0.54      | 0:00:11  | 0.0  | y          | y      |
| 135 | Gütersloh | 1000                    | 1.067           | 1.34      | 1.0       | 3         | 3         | 0.44      | 0:00:08  | 0.0  | y          | y      |
| 136 | Soest     | 1000                    | 1.038           | 1.34      | 1.0       | 3         | 3         | 0.5       | 0:00:27  | 0.0  | y          | y      |
| 137 | Dortmund  | 1000                    | 1.054           | 1.34      | 1.0       | 3         | 3         | 0.54      | 0:00:14  | 0.0  | y          | y      |
| 138 | Kassel    | 1000                    | 1.045           | 1.34      | 1.0       | 3         | 3         | 0.45      | 0:00:43  | 0.0  | y          | y      |
| 139 | Hannover  | 1000                    | 1.064           | 1.34      | 1.0       | 3         | 3         | 0.47      | 0:00:09  | 0.0  | y          | y      |
| 140 | Krefeld   | 1000                    | 1.089           | 1.34      | 1.0       | 3         | 3         | 0.47      | 0:00:14  | 0.0  | y          | y      |
| 141 | Münster   | 1000                    | 1.046           | 1.34      | 1.0       | 3         | 3         | 0.64      | 0:00:10  | 0.0  | y          | y      |

| #   | <i>cn</i> | Network characteristics |                 |           |           |           |           |           | Solution |      | Simulation |        |
|-----|-----------|-------------------------|-----------------|-----------|-----------|-----------|-----------|-----------|----------|------|------------|--------|
|     |           | <i>bu</i>               | $\frac{nl}{bu}$ | <i>lf</i> | <i>tr</i> | <i>lt</i> | <i>tt</i> | <i>as</i> | Time     | Gap  | Volt       | Ampere |
| 142 | Paderborn | 1000                    | 1.050           | 1.34      | 1.0       | 3         | 3         | 0.5       | 0:01:09  | 0.36 | n          | y      |
| 143 | Detmold   | 1000                    | 1.040           | 1.34      | 1.0       | 3         | 3         | 0.5       | 0:00:11  | 0.0  | y          | y      |
| 144 | Bielefeld | 1000                    | 1.038           | 1.34      | 1.0       | 3         | 3         | 0.53      | 0:00:40  | 0.33 | y          | y      |
| 145 | Gütersloh | 1000                    | 1.067           | 1.34      | 1.0       | 3         | 3         | 0.55      | 0:04:12  | 0.0  | y          | y      |
| 146 | Soest     | 1000                    | 1.038           | 1.34      | 1.0       | 3         | 3         | 0.52      | 0:00:14  | 0.0  | y          | y      |
| 147 | Dortmund  | 1000                    | 1.054           | 1.34      | 1.0       | 3         | 3         | 0.56      | 0:00:18  | 0.0  | y          | y      |
| 148 | Kassel    | 1000                    | 1.045           | 1.34      | 1.0       | 3         | 3         | 0.54      | 0:00:13  | 0.0  | y          | y      |
| 149 | Hannover  | 1000                    | 1.064           | 1.34      | 1.0       | 3         | 3         | 0.52      | 0:00:10  | 0.0  | y          | y      |
| 150 | Krefeld   | 1000                    | 1.089           | 1.34      | 1.0       | 3         | 3         | 0.52      | 0:00:11  | 0.0  | y          | y      |
| 151 | Münster   | 1000                    | 1.046           | 1.34      | 1.0       | 4         | 4         | 0.55      | 0:00:11  | 0.0  | y          | y      |
| 152 | Paderborn | 1000                    | 1.049           | 1.34      | 1.0       | 4         | 4         | 0.54      | 0:00:09  | 0.0  | y          | y      |
| 153 | Detmold   | 1000                    | 1.040           | 1.34      | 1.0       | 4         | 4         | 0.42      | 0:00:11  | 0.0  | y          | y      |
| 154 | Bielefeld | 1000                    | 1.039           | 1.34      | 1.0       | 4         | 4         | 0.41      | 0:00:09  | 0.0  | y          | y      |
| 155 | Gütersloh | 1000                    | 1.067           | 1.34      | 1.0       | 4         | 4         | 0.49      | 0:00:16  | 0.0  | y          | y      |
| 156 | Soest     | 1000                    | 1.038           | 1.34      | 1.0       | 4         | 4         | 0.51      | 0:00:06  | 0.0  | y          | y      |
| 157 | Dortmund  | 1000                    | 1.054           | 1.34      | 1.0       | 4         | 4         | 0.52      | 0:00:06  | 0.0  | y          | y      |
| 158 | Kassel    | 1000                    | 1.045           | 1.34      | 1.0       | 4         | 4         | 0.35      | 0:00:22  | 0.0  | y          | y      |
| 159 | Hannover  | 1000                    | 1.064           | 1.34      | 1.0       | 4         | 4         | 0.52      | 0:00:10  | 0.0  | y          | y      |
| 160 | Krefeld   | 1000                    | 1.089           | 1.34      | 1.0       | 4         | 4         | 0.39      | 0:00:14  | 0.0  | y          | y      |
| 161 | Münster   | 1000                    | 1.046           | 1.34      | 1.0       | 4         | 4         | 0.59      | 0:00:09  | 0.0  | y          | y      |
| 162 | Paderborn | 1000                    | 1.050           | 1.34      | 1.0       | 4         | 4         | 0.42      | 0:00:43  | 0.0  | n          | y      |
| 163 | Detmold   | 1000                    | 1.040           | 1.34      | 1.0       | 4         | 4         | 0.5       | 0:00:11  | 0.0  | y          | y      |
| 164 | Bielefeld | 1000                    | 1.038           | 1.34      | 1.0       | 4         | 4         | 0.56      | 0:00:11  | 0.0  | y          | y      |
| 165 | Gütersloh | 1000                    | 1.067           | 1.34      | 1.0       | 4         | 4         | 0.51      | 0:00:09  | 0.0  | y          | y      |
| 166 | Soest     | 1000                    | 1.039           | 1.34      | 1.0       | 4         | 4         | 0.51      | 0:00:08  | 0.0  | y          | y      |
| 167 | Dortmund  | 1000                    | 1.054           | 1.34      | 1.0       | 4         | 4         | 0.56      | 0:00:10  | 0.0  | y          | y      |
| 168 | Kassel    | 1000                    | 1.045           | 1.34      | 1.0       | 4         | 4         | 0.48      | 0:00:43  | 0.0  | y          | y      |
| 169 | Hannover  | 1000                    | 1.064           | 1.34      | 1.0       | 4         | 4         | 0.54      | 0:00:15  | 0.0  | y          | y      |
| 170 | Krefeld   | 1000                    | 1.089           | 1.34      | 1.0       | 4         | 4         | 0.46      | 0:00:17  | 0.0  | y          | y      |
| 171 | Münster   | 1000                    | 1.046           | 1.34      | 1.0       | 4         | 4         | 0.67      | 0:00:37  | 0.0  | y          | y      |
| 172 | Paderborn | 1000                    | 1.051           | 1.34      | 1.0       | 4         | 4         | 0.56      | 0:42:28  | 0.33 | n          | y      |
| 173 | Detmold   | 1000                    | 1.040           | 1.34      | 1.0       | 4         | 4         | 0.52      | 0:00:14  | 0.0  | y          | y      |
| 174 | Bielefeld | 1000                    | 1.038           | 1.34      | 1.0       | 4         | 4         | 0.56      | 0:00:56  | 0.33 | y          | y      |
| 175 | Gütersloh | 1000                    | 1.067           | 1.34      | 1.0       | 4         | 4         | 0.58      | 0:05:00  | 0.0  | y          | y      |
| 176 | Soest     | 1000                    | 1.040           | 1.34      | 1.0       | 4         | 4         | 0.52      | 0:00:09  | 0.0  | y          | y      |
| 177 | Dortmund  | 1000                    | 1.054           | 1.34      | 1.0       | 4         | 4         | 0.58      | 0:00:09  | 0.0  | y          | y      |
| 178 | Kassel    | 1000                    | 1.045           | 1.34      | 1.0       | 4         | 4         | 0.5       | 0:00:36  | 0.0  | y          | y      |
| 179 | Hannover  | 1000                    | 1.064           | 1.34      | 1.0       | 4         | 4         | 0.55      | 0:00:33  | 0.0  | y          | y      |
| 180 | Krefeld   | 1000                    | 1.089           | 1.34      | 1.0       | 4         | 4         | 0.5       | 0:00:21  | 0.0  | y          | y      |
| 181 | Münster   | 1000                    | 1.045           | 1.0       | 1.0       | 2         | 2         | 0.54      | 0:00:04  | 0.0  | y          | y      |
| 182 | Paderborn | 1000                    | 1.051           | 1.0       | 1.0       | 2         | 2         | 0.51      | 0:00:05  | 0.0  | y          | y      |
| 183 | Detmold   | 1000                    | 1.040           | 1.0       | 1.0       | 2         | 2         | 0.43      | 0:00:05  | 0.0  | y          | y      |
| 184 | Bielefeld | 1000                    | 1.038           | 1.0       | 1.0       | 2         | 2         | 0.45      | 0:00:04  | 0.0  | y          | y      |
| 185 | Gütersloh | 1000                    | 1.067           | 1.0       | 1.0       | 2         | 2         | 0.43      | 0:00:09  | 0.0  | y          | y      |
| 186 | Soest     | 1000                    | 1.040           | 1.0       | 1.0       | 2         | 2         | 0.32      | 0:00:06  | 0.0  | y          | y      |
| 187 | Dortmund  | 1000                    | 1.054           | 1.0       | 1.0       | 2         | 2         | 0.46      | 0:00:05  | 0.0  | y          | y      |
| 188 | Kassel    | 1000                    | 1.045           | 1.0       | 1.0       | 2         | 2         | 0.29      | 0:00:06  | 0.0  | y          | y      |
| 189 | Hannover  | 1000                    | 1.064           | 1.0       | 1.0       | 2         | 2         | 0.47      | 0:00:04  | 0.0  | y          | y      |
| 190 | Krefeld   | 1000                    | 1.089           | 1.0       | 1.0       | 2         | 2         | 0.32      | 0:00:28  | 0.0  | y          | y      |
| 191 | Münster   | 1000                    | 1.046           | 1.0       | 1.0       | 2         | 2         | 0.53      | 0:00:07  | 0.0  | y          | y      |
| 192 | Paderborn | 1000                    | 1.050           | 1.0       | 1.0       | 2         | 2         | 0.36      | 0:00:11  | 0.0  | y          | y      |
| 193 | Detmold   | 1000                    | 1.040           | 1.0       | 1.0       | 2         | 2         | 0.44      | 0:00:06  | 0.0  | y          | y      |

| #   | Network characteristics |           |                 |           |           |           |           |           | Solution |      | Simulation |        |
|-----|-------------------------|-----------|-----------------|-----------|-----------|-----------|-----------|-----------|----------|------|------------|--------|
|     | <i>cn</i>               | <i>bu</i> | $\frac{nl}{bu}$ | <i>lf</i> | <i>tr</i> | <i>lt</i> | <i>tt</i> | <i>as</i> | Time     | Gap  | Volt       | Ampere |
| 194 | Bielefeld               | 1000      | 1.039           | 1.0       | 1.0       | 2         | 2         | 0.42      | 0:00:06  | 0.0  | y          | y      |
| 195 | Gütersloh               | 1000      | 1.067           | 1.0       | 1.0       | 2         | 2         | 0.45      | 0:00:08  | 0.0  | y          | y      |
| 196 | Soest                   | 1000      | 1.038           | 1.0       | 1.0       | 2         | 2         | 0.47      | 0:00:04  | 0.0  | y          | y      |
| 197 | Dortmund                | 1000      | 1.054           | 1.0       | 1.0       | 2         | 2         | 0.5       | 0:00:05  | 0.0  | y          | y      |
| 198 | Kassel                  | 1000      | 1.045           | 1.0       | 1.0       | 2         | 2         | 0.42      | 0:00:10  | 0.0  | y          | y      |
| 199 | Hannover                | 1000      | 1.064           | 1.0       | 1.0       | 2         | 2         | 0.44      | 0:00:05  | 0.0  | y          | y      |
| 200 | Krefeld                 | 1000      | 1.089           | 1.0       | 1.0       | 2         | 2         | 0.4       | 0:00:35  | 0.0  | y          | y      |
| 201 | Münster                 | 1000      | 1.046           | 1.0       | 1.0       | 2         | 2         | 0.61      | 0:00:06  | 0.0  | y          | y      |
| 202 | Paderborn               | 1000      | 1.050           | 1.0       | 1.0       | 2         | 2         | 0.47      | 0:00:46  | 0.0  | y          | y      |
| 203 | Detmold                 | 1000      | 1.040           | 1.0       | 1.0       | 2         | 2         | 0.49      | 0:00:28  | 0.0  | y          | y      |
| 204 | Bielefeld               | 1000      | 1.038           | 1.0       | 1.0       | 2         | 2         | 0.5       | 0:00:14  | 0.0  | y          | y      |
| 205 | Gütersloh               | 1000      | 1.067           | 1.0       | 1.0       | 2         | 2         | 0.52      | 0:00:14  | 0.0  | y          | y      |
| 206 | Soest                   | 1000      | 1.038           | 1.0       | 1.0       | 2         | 2         | 0.47      | 0:00:09  | 0.0  | y          | y      |
| 207 | Dortmund                | 1000      | 1.054           | 1.0       | 1.0       | 2         | 2         | 0.52      | 0:00:12  | 0.0  | y          | y      |
| 208 | Kassel                  | 1000      | 1.045           | 1.0       | 1.0       | 2         | 2         | 0.45      | 0:00:11  | 0.43 | y          | y      |
| 209 | Hannover                | 1000      | 1.064           | 1.0       | 1.0       | 2         | 2         | 0.49      | 0:00:08  | 0.0  | y          | y      |
| 210 | Krefeld                 | 1000      | 1.089           | 1.0       | 1.0       | 2         | 2         | 0.45      | 0:01:01  | 0.0  | y          | y      |
| 211 | Münster                 | 1000      | 1.046           | 1.0       | 1.0       | 3         | 3         | 0.54      | 0:00:07  | 0.0  | y          | y      |
| 212 | Paderborn               | 1000      | 1.050           | 1.0       | 1.0       | 3         | 3         | 0.42      | 0:00:21  | 0.0  | y          | y      |
| 213 | Detmold                 | 1000      | 1.040           | 1.0       | 1.0       | 3         | 3         | 0.39      | 0:00:08  | 0.0  | y          | y      |
| 214 | Bielefeld               | 1000      | 1.038           | 1.0       | 1.0       | 3         | 3         | 0.45      | 0:00:09  | 0.0  | y          | y      |
| 215 | Gütersloh               | 1000      | 1.067           | 1.0       | 1.0       | 3         | 3         | 0.39      | 0:00:07  | 0.0  | y          | y      |
| 216 | Soest                   | 1000      | 1.038           | 1.0       | 1.0       | 3         | 3         | 0.49      | 0:00:04  | 0.0  | y          | y      |
| 217 | Dortmund                | 1000      | 1.054           | 1.0       | 1.0       | 3         | 3         | 0.49      | 0:00:07  | 0.0  | y          | y      |
| 218 | Kassel                  | 1000      | 1.045           | 1.0       | 1.0       | 3         | 3         | 0.33      | 0:00:06  | 0.0  | y          | y      |
| 219 | Hannover                | 1000      | 1.064           | 1.0       | 1.0       | 3         | 3         | 0.54      | 0:00:05  | 0.0  | y          | y      |
| 220 | Krefeld                 | 1000      | 1.090           | 1.0       | 1.0       | 3         | 3         | 0.5       | 0:00:11  | 0.0  | y          | y      |
| 221 | Münster                 | 1000      | 1.046           | 1.0       | 1.0       | 3         | 3         | 0.56      | 0:00:05  | 0.0  | y          | y      |
| 222 | Paderborn               | 1000      | 1.050           | 1.0       | 1.0       | 3         | 3         | 0.39      | 0:00:39  | 0.0  | y          | y      |
| 223 | Detmold                 | 1000      | 1.040           | 1.0       | 1.0       | 3         | 3         | 0.48      | 0:00:07  | 0.0  | y          | y      |
| 224 | Bielefeld               | 1000      | 1.038           | 1.0       | 1.0       | 3         | 3         | 0.54      | 0:00:05  | 0.39 | y          | y      |
| 225 | Gütersloh               | 1000      | 1.067           | 1.0       | 1.0       | 3         | 3         | 0.44      | 0:00:05  | 0.0  | y          | y      |
| 226 | Soest                   | 1000      | 1.038           | 1.0       | 1.0       | 3         | 3         | 0.5       | 0:00:04  | 0.0  | y          | y      |
| 227 | Dortmund                | 1000      | 1.052           | 1.0       | 1.0       | 3         | 3         | 0.56      | 0:00:09  | 0.0  | y          | y      |
| 228 | Kassel                  | 1000      | 1.045           | 1.0       | 1.0       | 3         | 3         | 0.45      | 0:00:15  | 0.0  | y          | y      |
| 229 | Hannover                | 1000      | 1.064           | 1.0       | 1.0       | 3         | 3         | 0.47      | 0:36:09  | 0.0  | y          | y      |
| 230 | Krefeld                 | 1000      | 1.089           | 1.0       | 1.0       | 3         | 3         | 0.47      | 0:00:27  | 0.0  | y          | y      |
| 231 | Münster                 | 1000      | 1.046           | 1.0       | 1.0       | 3         | 3         | 0.64      | 0:00:10  | 0.0  | y          | y      |
| 232 | Paderborn               | 1000      | 1.050           | 1.0       | 1.0       | 3         | 3         | 0.5       | 0:00:17  | 0.0  | y          | y      |
| 233 | Detmold                 | 1000      | 1.040           | 1.0       | 1.0       | 3         | 3         | 0.5       | 0:00:18  | 0.0  | y          | y      |
| 234 | Bielefeld               | 1000      | 1.038           | 1.0       | 1.0       | 3         | 3         | 0.53      | 0:00:37  | 0.0  | y          | y      |
| 235 | Gütersloh               | 1000      | 1.067           | 1.0       | 1.0       | 3         | 3         | 0.55      | 0:08:20  | 0.0  | y          | y      |
| 236 | Soest                   | 1000      | 1.038           | 1.0       | 1.0       | 3         | 3         | 0.52      | 0:00:05  | 0.0  | y          | y      |
| 237 | Dortmund                | 1000      | 1.054           | 1.0       | 1.0       | 3         | 3         | 0.56      | 0:00:13  | 0.0  | y          | y      |
| 238 | Kassel                  | 1000      | 1.045           | 1.0       | 1.0       | 3         | 3         | 0.48      | 0:00:07  | 0.0  | y          | y      |
| 239 | Hannover                | 1000      | 1.064           | 1.0       | 1.0       | 3         | 3         | 0.51      | 0:00:06  | 0.0  | y          | y      |
| 240 | Krefeld                 | 1000      | 1.089           | 1.0       | 1.0       | 3         | 3         | 0.47      | 0:00:56  | 0.0  | y          | y      |
| 241 | Münster                 | 1000      | 1.046           | 1.0       | 1.0       | 4         | 4         | 0.55      | 0:00:05  | 0.0  | y          | y      |
| 242 | Paderborn               | 1000      | 1.049           | 1.0       | 1.0       | 4         | 4         | 0.54      | 0:00:10  | 0.0  | y          | y      |
| 243 | Detmold                 | 1000      | 1.040           | 1.0       | 1.0       | 4         | 4         | 0.42      | 0:00:08  | 0.0  | y          | y      |
| 244 | Bielefeld               | 1000      | 1.038           | 1.0       | 1.0       | 4         | 4         | 0.48      | 0:00:06  | 0.0  | y          | y      |
| 245 | Gütersloh               | 1000      | 1.067           | 1.0       | 1.0       | 4         | 4         | 0.49      | 0:00:09  | 0.0  | y          | y      |

| #   | Network characteristics |           |                 |           |           |           |           |           | Solution |      | Simulation |        |
|-----|-------------------------|-----------|-----------------|-----------|-----------|-----------|-----------|-----------|----------|------|------------|--------|
|     | <i>cn</i>               | <i>bu</i> | $\frac{nl}{bu}$ | <i>lf</i> | <i>tr</i> | <i>lt</i> | <i>tt</i> | <i>as</i> | Time     | Gap  | Volt       | Ampere |
| 246 | Soest                   | 1000      | 1.038           | 1.0       | 1.0       | 4         | 4         | 0.51      | 0:00:09  | 0.0  | y          | y      |
| 247 | Dortmund                | 1000      | 1.054           | 1.0       | 1.0       | 4         | 4         | 0.52      | 0:00:06  | 0.0  | y          | y      |
| 248 | Kassel                  | 1000      | 1.045           | 1.0       | 1.0       | 4         | 4         | 0.57      | 0:00:08  | 0.0  | y          | y      |
| 249 | Hannover                | 1000      | 1.064           | 1.0       | 1.0       | 4         | 4         | 0.52      | 0:00:09  | 0.0  | y          | y      |
| 250 | Krefeld                 | 1000      | 1.089           | 1.0       | 1.0       | 4         | 4         | 0.55      | 0:00:10  | 0.0  | y          | y      |
| 251 | Münster                 | 1000      | 1.046           | 1.0       | 1.0       | 4         | 4         | 0.59      | 0:00:12  | 0.0  | y          | y      |
| 252 | Paderborn               | 1000      | 1.050           | 1.0       | 1.0       | 4         | 4         | 0.42      | 0:00:22  | 0.0  | y          | y      |
| 253 | Detmold                 | 1000      | 1.040           | 1.0       | 1.0       | 4         | 4         | 0.5       | 0:00:11  | 0.0  | y          | y      |
| 254 | Bielefeld               | 1000      | 1.038           | 1.0       | 1.0       | 4         | 4         | 0.56      | 0:00:06  | 0.0  | y          | y      |
| 255 | Gütersloh               | 1000      | 1.067           | 1.0       | 1.0       | 4         | 4         | 0.51      | 0:00:10  | 0.0  | y          | y      |
| 256 | Soest                   | 1000      | 1.039           | 1.0       | 1.0       | 4         | 4         | 0.52      | 0:00:09  | 0.0  | y          | y      |
| 257 | Dortmund                | 1000      | 1.054           | 1.0       | 1.0       | 4         | 4         | 0.56      | 0:00:06  | 0.0  | y          | y      |
| 258 | Kassel                  | 1000      | 1.046           | 1.0       | 1.0       | 4         | 4         | 0.41      | 0:00:09  | 0.0  | y          | y      |
| 259 | Hannover                | 1000      | 1.064           | 1.0       | 1.0       | 4         | 4         | 0.49      | 0:06:11  | 0.41 | y          | y      |
| 260 | Krefeld                 | 1000      | 1.090           | 1.0       | 1.0       | 4         | 4         | 0.53      | 0:00:12  | 0.0  | y          | y      |
| 261 | Münster                 | 1000      | 1.046           | 1.0       | 1.0       | 4         | 4         | 0.67      | 0:00:15  | 0.0  | y          | y      |
| 262 | Paderborn               | 1000      | 1.050           | 1.0       | 1.0       | 4         | 4         | 0.53      | 0:00:42  | 0.0  | y          | y      |
| 263 | Detmold                 | 1000      | 1.040           | 1.0       | 1.0       | 4         | 4         | 0.52      | 0:00:08  | 0.0  | y          | y      |
| 264 | Bielefeld               | 1000      | 1.039           | 1.0       | 1.0       | 4         | 4         | 0.54      | 0:00:16  | 0.0  | y          | y      |
| 265 | Gütersloh               | 1000      | 1.067           | 1.0       | 1.0       | 4         | 4         | 0.58      | 0:02:29  | 0.0  | y          | y      |
| 266 | Soest                   | 1000      | 1.039           | 1.0       | 1.0       | 4         | 4         | 0.58      | 0:00:06  | 0.0  | y          | y      |
| 267 | Dortmund                | 1000      | 1.054           | 1.0       | 1.0       | 4         | 4         | 0.58      | 0:00:09  | 0.0  | y          | y      |
| 268 | Kassel                  | 1000      | 1.045           | 1.0       | 1.0       | 4         | 4         | 0.5       | 0:00:41  | 0.0  | y          | y      |
| 269 | Hannover                | 1000      | 1.064           | 1.0       | 1.0       | 4         | 4         | 0.55      | 0:00:45  | 0.0  | y          | y      |
| 270 | Krefeld                 | 1000      | 1.089           | 1.0       | 1.0       | 4         | 4         | 0.5       | 0:00:53  | 0.0  | y          | y      |
| 271 | Münster                 | 1000      | 1.047           | 0.83      | 1.3       | 2         | 2         | 0.38      | 0:00:06  | 0.0  | y          | y      |
| 272 | Paderborn               | 1000      | 1.052           | 0.83      | 1.3       | 2         | 2         | 0.35      | 0:00:05  | 0.0  | y          | y      |
| 273 | Detmold                 | 1000      | 1.042           | 0.83      | 1.3       | 2         | 2         | 0.43      | 0:00:09  | 0.0  | y          | y      |
| 274 | Bielefeld               | 1000      | 1.040           | 0.83      | 1.3       | 2         | 2         | 0.31      | 0:00:09  | 0.0  | y          | y      |
| 275 | Gütersloh               | 1000      | 1.069           | 0.83      | 1.3       | 2         | 2         | 0.37      | 0:00:10  | 0.0  | y          | y      |
| 276 | Soest                   | 1000      | 1.042           | 0.83      | 1.3       | 2         | 2         | 0.29      | 0:00:07  | 0.0  | y          | y      |
| 277 | Dortmund                | 1000      | 1.055           | 0.83      | 1.3       | 2         | 2         | 0.36      | 0:00:10  | 0.0  | y          | y      |
| 278 | Kassel                  | 1000      | 1.047           | 0.83      | 1.3       | 2         | 2         | 0.33      | 0:00:08  | 0.0  | y          | y      |
| 279 | Hannover                | 1000      | 1.067           | 0.83      | 1.3       | 2         | 2         | 0.45      | 0:00:09  | 0.0  | y          | y      |
| 280 | Krefeld                 | 1000      | 1.092           | 0.83      | 1.3       | 2         | 2         | 0.3       | 0:00:08  | 0.0  | y          | y      |
| 281 | Münster                 | 1000      | 1.047           | 0.83      | 1.3       | 2         | 2         | 0.4       | 0:00:12  | 0.0  | y          | y      |
| 282 | Paderborn               | 1000      | 1.052           | 0.83      | 1.3       | 2         | 2         | 0.34      | 0:00:08  | 0.0  | y          | y      |
| 283 | Detmold                 | 1000      | 1.042           | 0.83      | 1.3       | 2         | 2         | 0.46      | 0:00:15  | 0.0  | y          | y      |
| 284 | Bielefeld               | 1000      | 1.040           | 0.83      | 1.3       | 2         | 2         | 0.34      | 0:00:10  | 0.0  | y          | y      |
| 285 | Gütersloh               | 1000      | 1.069           | 0.83      | 1.3       | 2         | 2         | 0.46      | 0:00:10  | 0.0  | y          | y      |
| 286 | Soest                   | 1000      | 1.041           | 0.83      | 1.3       | 2         | 2         | 0.39      | 0:00:07  | 0.0  | y          | y      |
| 287 | Dortmund                | 1000      | 1.055           | 0.83      | 1.3       | 2         | 2         | 0.44      | 0:00:12  | 0.0  | y          | y      |
| 288 | Kassel                  | 1000      | 1.049           | 0.83      | 1.3       | 2         | 2         | 0.38      | 0:00:11  | 0.0  | y          | y      |
| 289 | Hannover                | 1000      | 1.066           | 0.83      | 1.3       | 2         | 2         | 0.41      | 0:00:10  | 0.0  | y          | y      |
| 290 | Krefeld                 | 1000      | 1.092           | 0.83      | 1.3       | 2         | 2         | 0.38      | 0:00:18  | 0.0  | y          | y      |
| 291 | Münster                 | 1000      | 1.047           | 0.83      | 1.3       | 2         | 2         | 0.44      | 0:00:26  | 0.0  | y          | y      |
| 292 | Paderborn               | 1000      | 1.052           | 0.83      | 1.3       | 2         | 2         | 0.45      | 0:00:11  | 0.0  | y          | y      |
| 293 | Detmold                 | 1000      | 1.042           | 0.83      | 1.3       | 2         | 2         | 0.52      | 0:00:07  | 0.0  | y          | y      |
| 294 | Bielefeld               | 1000      | 1.040           | 0.83      | 1.3       | 2         | 2         | 0.43      | 0:00:17  | 0.0  | y          | y      |
| 295 | Gütersloh               | 1000      | 1.068           | 0.83      | 1.3       | 2         | 2         | 0.49      | 0:00:19  | 0.0  | y          | y      |
| 296 | Soest                   | 1000      | 1.041           | 0.83      | 1.3       | 2         | 2         | 0.44      | 0:00:06  | 0.0  | y          | y      |
| 297 | Dortmund                | 1000      | 1.055           | 0.83      | 1.3       | 2         | 2         | 0.45      | 0:00:33  | 0.0  | y          | y      |

| #   | Network characteristics |           |                 |           |           |           |           |           | Solution |      | Simulation |        |
|-----|-------------------------|-----------|-----------------|-----------|-----------|-----------|-----------|-----------|----------|------|------------|--------|
|     | <i>cn</i>               | <i>bu</i> | $\frac{nl}{bu}$ | <i>lf</i> | <i>tr</i> | <i>lt</i> | <i>tt</i> | <i>as</i> | Time     | Gap  | Volt       | Ampere |
| 298 | Kassel                  | 1000      | 1.049           | 0.83      | 1.3       | 2         | 2         | 0.47      | 0:00:19  | 0.0  | y          | y      |
| 299 | Hannover                | 1000      | 1.067           | 0.83      | 1.3       | 2         | 2         | 0.54      | 0:00:14  | 0.0  | y          | y      |
| 300 | Krefeld                 | 1000      | 1.091           | 0.83      | 1.3       | 2         | 2         | 0.44      | 0:00:15  | 0.0  | y          | y      |
| 301 | Münster                 | 1000      | 1.046           | 0.83      | 1.3       | 3         | 3         | 0.37      | 0:00:09  | 0.0  | y          | y      |
| 302 | Paderborn               | 1000      | 1.052           | 0.83      | 1.3       | 3         | 3         | 0.39      | 0:00:08  | 0.0  | y          | y      |
| 303 | Detmold                 | 1000      | 1.042           | 0.83      | 1.3       | 3         | 3         | 0.46      | 0:00:10  | 0.0  | y          | y      |
| 304 | Bielefeld               | 1000      | 1.040           | 0.83      | 1.3       | 3         | 3         | 0.34      | 0:00:05  | 0.0  | y          | y      |
| 305 | Gütersloh               | 1000      | 1.069           | 0.83      | 1.3       | 3         | 3         | 0.4       | 0:00:11  | 0.0  | y          | y      |
| 306 | Soest                   | 1000      | 1.042           | 0.83      | 1.3       | 3         | 3         | 0.32      | 0:00:08  | 0.0  | y          | y      |
| 307 | Dortmund                | 1000      | 1.055           | 0.83      | 1.3       | 3         | 3         | 0.41      | 0:00:10  | 0.0  | y          | y      |
| 308 | Kassel                  | 1000      | 1.047           | 0.83      | 1.3       | 3         | 3         | 0.37      | 0:00:18  | 0.0  | y          | y      |
| 309 | Hannover                | 1000      | 1.067           | 0.83      | 1.3       | 3         | 3         | 0.49      | 0:00:06  | 0.0  | y          | y      |
| 310 | Krefeld                 | 1000      | 1.091           | 0.83      | 1.3       | 3         | 3         | 0.38      | 0:00:09  | 0.0  | y          | y      |
| 311 | Münster                 | 1000      | 1.047           | 0.83      | 1.3       | 3         | 3         | 0.43      | 0:00:15  | 0.0  | y          | y      |
| 312 | Paderborn               | 1000      | 1.052           | 0.83      | 1.3       | 3         | 3         | 0.37      | 0:00:09  | 0.0  | y          | y      |
| 313 | Detmold                 | 1000      | 1.042           | 0.83      | 1.3       | 3         | 3         | 0.49      | 0:00:12  | 0.0  | y          | y      |
| 314 | Bielefeld               | 1000      | 1.040           | 0.83      | 1.3       | 3         | 3         | 0.37      | 0:00:12  | 0.0  | y          | y      |
| 315 | Gütersloh               | 1000      | 1.068           | 0.83      | 1.3       | 3         | 3         | 0.44      | 0:00:19  | 0.0  | y          | y      |
| 316 | Soest                   | 1000      | 1.042           | 0.83      | 1.3       | 3         | 3         | 0.38      | 0:00:08  | 0.0  | y          | y      |
| 317 | Dortmund                | 1000      | 1.055           | 0.83      | 1.3       | 3         | 3         | 0.47      | 0:00:12  | 0.0  | y          | y      |
| 318 | Kassel                  | 1000      | 1.049           | 0.83      | 1.3       | 3         | 3         | 0.41      | 0:00:07  | 0.0  | y          | y      |
| 319 | Hannover                | 1000      | 1.067           | 0.83      | 1.3       | 3         | 3         | 0.49      | 0:00:12  | 0.0  | y          | y      |
| 320 | Krefeld                 | 1000      | 1.091           | 0.83      | 1.3       | 3         | 3         | 0.38      | 0:02:04  | 0.0  | y          | y      |
| 321 | Münster                 | 1000      | 1.046           | 0.83      | 1.3       | 3         | 3         | 0.49      | 0:00:22  | 0.0  | y          | y      |
| 322 | Paderborn               | 1000      | 1.052           | 0.83      | 1.3       | 3         | 3         | 0.48      | 0:00:15  | 0.0  | y          | y      |
| 323 | Detmold                 | 1000      | 1.042           | 0.83      | 1.3       | 3         | 3         | 0.55      | 0:00:09  | 0.0  | y          | y      |
| 324 | Bielefeld               | 1000      | 1.040           | 0.83      | 1.3       | 3         | 3         | 0.46      | 0:00:23  | 0.0  | y          | y      |
| 325 | Gütersloh               | 1000      | 1.068           | 0.83      | 1.3       | 3         | 3         | 0.52      | 0:00:24  | 0.0  | y          | y      |
| 326 | Soest                   | 1000      | 1.042           | 0.83      | 1.3       | 3         | 3         | 0.48      | 0:00:13  | 0.0  | y          | y      |
| 327 | Dortmund                | 1000      | 1.055           | 0.83      | 1.3       | 3         | 3         | 0.48      | 0:00:16  | 0.0  | y          | y      |
| 328 | Kassel                  | 1000      | 1.049           | 0.83      | 1.3       | 3         | 3         | 0.5       | 0:00:13  | 0.0  | y          | y      |
| 329 | Hannover                | 1000      | 1.067           | 0.83      | 1.3       | 3         | 3         | 0.57      | 0:00:14  | 0.0  | y          | y      |
| 330 | Krefeld                 | 1000      | 1.091           | 0.83      | 1.3       | 3         | 3         | 0.47      | 0:00:18  | 0.0  | y          | y      |
| 331 | Münster                 | 1000      | 1.048           | 0.83      | 1.3       | 4         | 4         | 0.5       | 0:00:06  | 0.0  | y          | y      |
| 332 | Paderborn               | 1000      | 1.052           | 0.83      | 1.3       | 4         | 4         | 0.41      | 0:00:09  | 0.0  | y          | y      |
| 333 | Detmold                 | 1000      | 1.042           | 0.83      | 1.3       | 4         | 4         | 0.49      | 0:00:07  | 0.0  | y          | y      |
| 334 | Bielefeld               | 1000      | 1.040           | 0.83      | 1.3       | 4         | 4         | 0.37      | 0:00:07  | 0.0  | y          | y      |
| 335 | Gütersloh               | 1000      | 1.068           | 0.83      | 1.3       | 4         | 4         | 0.44      | 0:00:25  | 0.0  | y          | y      |
| 336 | Soest                   | 1000      | 1.042           | 0.83      | 1.3       | 4         | 4         | 0.35      | 0:00:07  | 0.0  | y          | y      |
| 337 | Dortmund                | 1000      | 1.055           | 0.83      | 1.3       | 4         | 4         | 0.42      | 0:00:13  | 0.0  | y          | y      |
| 338 | Kassel                  | 1000      | 1.047           | 0.83      | 1.3       | 4         | 4         | 0.39      | 0:00:09  | 0.0  | y          | y      |
| 339 | Hannover                | 1000      | 1.067           | 0.83      | 1.3       | 4         | 4         | 0.51      | 0:00:09  | 0.0  | y          | y      |
| 340 | Krefeld                 | 1000      | 1.091           | 0.83      | 1.3       | 4         | 4         | 0.41      | 0:00:40  | 0.0  | y          | y      |
| 341 | Münster                 | 1000      | 1.046           | 0.83      | 1.3       | 4         | 4         | 0.41      | 0:00:13  | 0.0  | y          | y      |
| 342 | Paderborn               | 1000      | 1.052           | 0.83      | 1.3       | 4         | 4         | 0.4       | 0:00:12  | 0.0  | y          | y      |
| 343 | Detmold                 | 1000      | 1.042           | 0.83      | 1.3       | 4         | 4         | 0.52      | 0:00:12  | 0.39 | y          | y      |
| 344 | Bielefeld               | 1000      | 1.040           | 0.83      | 1.3       | 4         | 4         | 0.4       | 0:00:21  | 0.0  | y          | y      |
| 345 | Gütersloh               | 1000      | 1.068           | 0.83      | 1.3       | 4         | 4         | 0.46      | 0:00:16  | 0.0  | y          | y      |
| 346 | Soest                   | 1000      | 1.042           | 0.83      | 1.3       | 4         | 4         | 0.4       | 0:00:07  | 0.0  | y          | y      |
| 347 | Dortmund                | 1000      | 1.055           | 0.83      | 1.3       | 4         | 4         | 0.52      | 0:00:15  | 0.0  | y          | y      |
| 348 | Kassel                  | 1000      | 1.047           | 0.83      | 1.3       | 4         | 4         | 0.42      | 0:00:10  | 0.0  | y          | y      |
| 349 | Hannover                | 1000      | 1.067           | 0.83      | 1.3       | 4         | 4         | 0.52      | 0:00:12  | 0.0  | y          | y      |

| #   | <i>cn</i> | Network characteristics |                 |           |           |           |           |           | Solution |      | Simulation |        |
|-----|-----------|-------------------------|-----------------|-----------|-----------|-----------|-----------|-----------|----------|------|------------|--------|
|     |           | <i>bu</i>               | $\frac{nl}{bu}$ | <i>lf</i> | <i>tr</i> | <i>lt</i> | <i>tt</i> | <i>as</i> | Time     | Gap  | Volt       | Ampere |
| 350 | Krefeld   | 1000                    | 1.092           | 0.83      | 1.3       | 4         | 4         | 0.43      | 0:00:22  | 0.0  | y          | y      |
| 351 | Münster   | 1000                    | 1.047           | 0.83      | 1.3       | 4         | 4         | 0.49      | 0:01:18  | 0.0  | y          | y      |
| 352 | Paderborn | 1000                    | 1.052           | 0.83      | 1.3       | 4         | 4         | 0.51      | 0:00:16  | 0.0  | y          | y      |
| 353 | Detmold   | 1000                    | 1.042           | 0.83      | 1.3       | 4         | 4         | 0.58      | 0:00:07  | 0.0  | y          | y      |
| 354 | Bielefeld | 1000                    | 1.040           | 0.83      | 1.3       | 4         | 4         | 0.49      | 0:00:27  | 0.0  | y          | y      |
| 355 | Gütersloh | 1000                    | 1.068           | 0.83      | 1.3       | 4         | 4         | 0.54      | 0:00:10  | 0.23 | y          | y      |
| 356 | Soest     | 1000                    | 1.042           | 0.83      | 1.3       | 4         | 4         | 0.5       | 0:00:13  | 0.0  | y          | y      |
| 357 | Dortmund  | 1000                    | 1.055           | 0.83      | 1.3       | 4         | 4         | 0.5       | 0:00:23  | 0.0  | y          | y      |
| 358 | Kassel    | 1000                    | 1.047           | 0.83      | 1.3       | 4         | 4         | 0.45      | 0:00:18  | 0.0  | y          | y      |
| 359 | Hannover  | 1000                    | 1.067           | 0.83      | 1.3       | 4         | 4         | 0.6       | 0:00:19  | 0.0  | y          | y      |
| 360 | Krefeld   | 1000                    | 1.092           | 0.83      | 1.3       | 4         | 4         | 0.51      | 0:00:23  | 0.0  | y          | y      |
| 361 | Münster   | 1000                    | 1.047           | 1.34      | 1.3       | 2         | 2         | 0.37      | 0:00:08  | 0.0  | y          | y      |
| 362 | Paderborn | 1000                    | 1.052           | 1.34      | 1.3       | 2         | 2         | 0.35      | 0:00:11  | 0.0  | y          | y      |
| 363 | Detmold   | 1000                    | 1.042           | 1.34      | 1.3       | 2         | 2         | 0.43      | 0:00:09  | 0.0  | y          | y      |
| 364 | Bielefeld | 1000                    | 1.040           | 1.34      | 1.3       | 2         | 2         | 0.31      | 0:00:08  | 0.0  | y          | y      |
| 365 | Gütersloh | 1000                    | 1.068           | 1.34      | 1.3       | 2         | 2         | 0.38      | 0:00:12  | 0.0  | y          | y      |
| 366 | Soest     | 1000                    | 1.042           | 1.34      | 1.3       | 2         | 2         | 0.29      | 0:00:06  | 0.0  | y          | y      |
| 367 | Dortmund  | 1000                    | 1.055           | 1.34      | 1.3       | 2         | 2         | 0.36      | 0:00:14  | 0.0  | y          | y      |
| 368 | Kassel    | 1000                    | 1.049           | 1.34      | 1.3       | 2         | 2         | 0.38      | 0:00:08  | 0.0  | y          | y      |
| 369 | Hannover  | 1000                    | 1.066           | 1.34      | 1.3       | 2         | 2         | 0.33      | 0:00:06  | 0.0  | y          | y      |
| 370 | Krefeld   | 1000                    | 1.091           | 1.34      | 1.3       | 2         | 2         | 0.35      | 0:00:09  | 0.0  | y          | y      |
| 371 | Münster   | 1000                    | 1.047           | 1.34      | 1.3       | 2         | 2         | 0.4       | 0:00:14  | 0.0  | y          | y      |
| 372 | Paderborn | 1000                    | 1.052           | 1.34      | 1.3       | 2         | 2         | 0.34      | 0:00:17  | 0.0  | y          | y      |
| 373 | Detmold   | 1000                    | 1.042           | 1.34      | 1.3       | 2         | 2         | 0.46      | 0:00:12  | 0.0  | y          | y      |
| 374 | Bielefeld | 1000                    | 1.040           | 1.34      | 1.3       | 2         | 2         | 0.39      | 0:00:11  | 0.0  | y          | y      |
| 375 | Gütersloh | 1000                    | 1.068           | 1.34      | 1.3       | 2         | 2         | 0.4       | 0:00:11  | 0.0  | y          | y      |
| 376 | Soest     | 1000                    | 1.042           | 1.34      | 1.3       | 2         | 2         | 0.53      | 0:00:23  | 0.0  | y          | y      |
| 377 | Dortmund  | 1000                    | 1.055           | 1.34      | 1.3       | 2         | 2         | 0.44      | 0:00:25  | 0.0  | y          | y      |
| 378 | Kassel    | 1000                    | 1.047           | 1.34      | 1.3       | 2         | 2         | 0.36      | 0:00:08  | 0.0  | y          | y      |
| 379 | Hannover  | 1000                    | 1.068           | 1.34      | 1.3       | 2         | 2         | 0.39      | 0:00:07  | 0.0  | y          | y      |
| 380 | Krefeld   | 1000                    | 1.092           | 1.34      | 1.3       | 2         | 2         | 0.38      | 0:00:45  | 0.0  | y          | y      |
| 381 | Münster   | 1000                    | 1.048           | 1.34      | 1.3       | 2         | 2         | 0.46      | 0:00:24  | 0.0  | y          | y      |
| 382 | Paderborn | 1000                    | 1.052           | 1.34      | 1.3       | 2         | 2         | 0.45      | 0:00:17  | 0.0  | y          | y      |
| 383 | Detmold   | 1000                    | 1.042           | 1.34      | 1.3       | 2         | 2         | 0.52      | 0:00:12  | 0.0  | y          | y      |
| 384 | Bielefeld | 1000                    | 1.040           | 1.34      | 1.3       | 2         | 2         | 0.43      | 0:00:29  | 0.0  | y          | y      |
| 385 | Gütersloh | 1000                    | 1.068           | 1.34      | 1.3       | 2         | 2         | 0.51      | 0:00:29  | 0.0  | y          | y      |
| 386 | Soest     | 1000                    | 1.041           | 1.34      | 1.3       | 2         | 2         | 0.46      | 0:00:11  | 0.0  | y          | y      |
| 387 | Dortmund  | 1000                    | 1.055           | 1.34      | 1.3       | 2         | 2         | 0.45      | 0:01:38  | 0.0  | y          | y      |
| 388 | Kassel    | 1000                    | 1.047           | 1.34      | 1.3       | 2         | 2         | 0.4       | 0:00:19  | 0.0  | y          | y      |
| 389 | Hannover  | 1000                    | 1.067           | 1.34      | 1.3       | 2         | 2         | 0.54      | 0:00:13  | 0.0  | y          | y      |
| 390 | Krefeld   | 1000                    | 1.092           | 1.34      | 1.3       | 2         | 2         | 0.4       | 0:00:16  | 0.0  | y          | y      |
| 391 | Münster   | 1000                    | 1.046           | 1.34      | 1.3       | 3         | 3         | 0.37      | 0:00:12  | 0.0  | y          | y      |
| 392 | Paderborn | 1000                    | 1.052           | 1.34      | 1.3       | 3         | 3         | 0.39      | 0:00:24  | 0.0  | y          | y      |
| 393 | Detmold   | 1000                    | 1.042           | 1.34      | 1.3       | 3         | 3         | 0.46      | 0:00:07  | 0.0  | y          | y      |
| 394 | Bielefeld | 1000                    | 1.040           | 1.34      | 1.3       | 3         | 3         | 0.53      | 0:00:06  | 0.0  | y          | y      |
| 395 | Gütersloh | 1000                    | 1.068           | 1.34      | 1.3       | 3         | 3         | 0.41      | 0:00:11  | 0.0  | y          | y      |
| 396 | Soest     | 1000                    | 1.042           | 1.34      | 1.3       | 3         | 3         | 0.32      | 0:00:08  | 0.0  | y          | y      |
| 397 | Dortmund  | 1000                    | 1.055           | 1.34      | 1.3       | 3         | 3         | 0.41      | 0:00:36  | 0.0  | y          | y      |
| 398 | Kassel    | 1000                    | 1.047           | 1.34      | 1.3       | 3         | 3         | 0.37      | 0:00:13  | 0.0  | y          | y      |
| 399 | Hannover  | 1000                    | 1.067           | 1.34      | 1.3       | 3         | 3         | 0.49      | 0:00:06  | 0.0  | y          | y      |
| 400 | Krefeld   | 1000                    | 1.092           | 1.34      | 1.3       | 3         | 3         | 0.35      | 0:00:11  | 0.0  | y          | y      |
| 401 | Münster   | 1000                    | 1.047           | 1.34      | 1.3       | 3         | 3         | 0.43      | 0:00:18  | 0.0  | y          | y      |

| #   | <i>cn</i> | Network characteristics |                 |           |           |           |           |           | Solution |      | Simulation |        |
|-----|-----------|-------------------------|-----------------|-----------|-----------|-----------|-----------|-----------|----------|------|------------|--------|
|     |           | <i>bu</i>               | $\frac{nl}{bu}$ | <i>lf</i> | <i>tr</i> | <i>lt</i> | <i>tt</i> | <i>as</i> | Time     | Gap  | Volt       | Ampere |
| 402 | Paderborn | 1000                    | 1.052           | 1.34      | 1.3       | 3         | 3         | 0.37      | 0:00:39  | 0.0  | y          | y      |
| 403 | Detmold   | 1000                    | 1.042           | 1.34      | 1.3       | 3         | 3         | 0.49      | 0:00:06  | 0.0  | y          | y      |
| 404 | Bielefeld | 1000                    | 1.040           | 1.34      | 1.3       | 3         | 3         | 0.37      | 0:00:20  | 0.0  | y          | y      |
| 405 | Gütersloh | 1000                    | 1.068           | 1.34      | 1.3       | 3         | 3         | 0.44      | 0:00:15  | 0.0  | y          | y      |
| 406 | Soest     | 1000                    | 1.042           | 1.34      | 1.3       | 3         | 3         | 0.38      | 0:00:10  | 0.0  | y          | y      |
| 407 | Dortmund  | 1000                    | 1.055           | 1.34      | 1.3       | 3         | 3         | 0.47      | 0:00:19  | 0.0  | y          | y      |
| 408 | Kassel    | 1000                    | 1.047           | 1.34      | 1.3       | 3         | 3         | 0.39      | 0:00:12  | 0.0  | y          | y      |
| 409 | Hannover  | 1000                    | 1.067           | 1.34      | 1.3       | 3         | 3         | 0.49      | 0:00:17  | 0.0  | y          | y      |
| 410 | Krefeld   | 1000                    | 1.091           | 1.34      | 1.3       | 3         | 3         | 0.38      | 0:01:00  | 0.0  | y          | y      |
| 411 | Münster   | 1000                    | 1.049           | 1.34      | 1.3       | 3         | 3         | 0.49      | 0:00:19  | 0.0  | y          | y      |
| 412 | Paderborn | 1000                    | 1.052           | 1.34      | 1.3       | 3         | 3         | 0.48      | 0:00:33  | 0.0  | y          | y      |
| 413 | Detmold   | 1000                    | 1.042           | 1.34      | 1.3       | 3         | 3         | 0.55      | 0:00:09  | 0.0  | y          | y      |
| 414 | Bielefeld | 1000                    | 1.040           | 1.34      | 1.3       | 3         | 3         | 0.46      | 0:00:33  | 0.0  | y          | y      |
| 415 | Gütersloh | 1000                    | 1.069           | 1.34      | 1.3       | 3         | 3         | 0.5       | 0:00:39  | 0.0  | y          | y      |
| 416 | Soest     | 1000                    | 1.042           | 1.34      | 1.3       | 3         | 3         | 0.48      | 0:00:46  | 0.0  | y          | y      |
| 417 | Dortmund  | 1000                    | 1.055           | 1.34      | 1.3       | 3         | 3         | 0.48      | 0:00:29  | 0.0  | y          | y      |
| 418 | Kassel    | 1000                    | 1.047           | 1.34      | 1.3       | 3         | 3         | 0.43      | 0:00:15  | 0.0  | y          | y      |
| 419 | Hannover  | 1000                    | 1.067           | 1.34      | 1.3       | 3         | 3         | 0.57      | 0:00:13  | 0.0  | y          | y      |
| 420 | Krefeld   | 1000                    | 1.092           | 1.34      | 1.3       | 3         | 3         | 0.43      | 0:00:25  | 0.0  | y          | y      |
| 421 | Münster   | 1000                    | 1.046           | 1.34      | 1.3       | 4         | 4         | 0.4       | 0:00:08  | 0.0  | y          | y      |
| 422 | Paderborn | 1000                    | 1.052           | 1.34      | 1.3       | 4         | 4         | 0.41      | 0:00:11  | 0.0  | y          | y      |
| 423 | Detmold   | 1000                    | 1.043           | 1.34      | 1.3       | 4         | 4         | 0.68      | 0:00:21  | 0.0  | y          | y      |
| 424 | Bielefeld | 1000                    | 1.040           | 1.34      | 1.3       | 4         | 4         | 0.55      | 0:00:08  | 0.0  | y          | y      |
| 425 | Gütersloh | 1000                    | 1.068           | 1.34      | 1.3       | 4         | 4         | 0.44      | 0:00:11  | 0.0  | y          | y      |
| 426 | Soest     | 1000                    | 1.042           | 1.34      | 1.3       | 4         | 4         | 0.35      | 0:00:07  | 0.0  | y          | y      |
| 427 | Dortmund  | 1000                    | 1.055           | 1.34      | 1.3       | 4         | 4         | 0.44      | 0:00:11  | 0.0  | y          | y      |
| 428 | Kassel    | 1000                    | 1.049           | 1.34      | 1.3       | 4         | 4         | 0.44      | 0:00:09  | 0.0  | y          | y      |
| 429 | Hannover  | 1000                    | 1.067           | 1.34      | 1.3       | 4         | 4         | 0.51      | 0:00:06  | 0.0  | y          | y      |
| 430 | Krefeld   | 1000                    | 1.092           | 1.34      | 1.3       | 4         | 4         | 0.36      | 0:00:13  | 0.0  | y          | y      |
| 431 | Münster   | 1000                    | 1.046           | 1.34      | 1.3       | 4         | 4         | 0.41      | 0:00:15  | 0.0  | y          | y      |
| 432 | Paderborn | 1000                    | 1.052           | 1.34      | 1.3       | 4         | 4         | 0.4       | 0:00:41  | 0.0  | y          | y      |
| 433 | Detmold   | 1000                    | 1.042           | 1.34      | 1.3       | 4         | 4         | 0.52      | 0:00:15  | 0.0  | y          | y      |
| 434 | Bielefeld | 1000                    | 1.040           | 1.34      | 1.3       | 4         | 4         | 0.4       | 0:00:30  | 0.0  | y          | y      |
| 435 | Gütersloh | 1000                    | 1.069           | 1.34      | 1.3       | 4         | 4         | 0.48      | 0:00:18  | 0.0  | y          | y      |
| 436 | Soest     | 1000                    | 1.042           | 1.34      | 1.3       | 4         | 4         | 0.4       | 0:00:14  | 0.0  | y          | y      |
| 437 | Dortmund  | 1000                    | 1.055           | 1.34      | 1.3       | 4         | 4         | 0.5       | 0:00:44  | 0.0  | y          | y      |
| 438 | Kassel    | 1000                    | 1.047           | 1.34      | 1.3       | 4         | 4         | 0.42      | 0:00:19  | 0.0  | y          | y      |
| 439 | Hannover  | 1000                    | 1.067           | 1.34      | 1.3       | 4         | 4         | 0.52      | 0:00:18  | 0.0  | y          | y      |
| 440 | Krefeld   | 1000                    | 1.092           | 1.34      | 1.3       | 4         | 4         | 0.43      | 0:00:37  | 0.0  | y          | y      |
| 441 | Münster   | 1000                    | 1.047           | 1.34      | 1.3       | 4         | 4         | 0.49      | 0:18:22  | 0.31 | y          | y      |
| 442 | Paderborn | 1000                    | 1.052           | 1.34      | 1.3       | 4         | 4         | 0.51      | 0:00:17  | 0.0  | y          | y      |
| 443 | Detmold   | 1000                    | 1.042           | 1.34      | 1.3       | 4         | 4         | 0.58      | 0:00:11  | 0.0  | y          | y      |
| 444 | Bielefeld | 1000                    | 1.040           | 1.34      | 1.3       | 4         | 4         | 0.49      | 0:00:26  | 0.0  | y          | y      |
| 445 | Gütersloh | 1000                    | 1.068           | 1.34      | 1.3       | 4         | 4         | 0.57      | 0:00:31  | 0.08 | y          | y      |
| 446 | Soest     | 1000                    | 1.042           | 1.34      | 1.3       | 4         | 4         | 0.5       | 0:00:48  | 0.0  | y          | y      |
| 447 | Dortmund  | 1000                    | 1.055           | 1.34      | 1.3       | 4         | 4         | 0.5       | 0:00:35  | 0.0  | y          | y      |
| 448 | Kassel    | 1000                    | 1.047           | 1.34      | 1.3       | 4         | 4         | 0.45      | 0:00:25  | 0.0  | y          | y      |
| 449 | Hannover  | 1000                    | 1.068           | 1.34      | 1.3       | 4         | 4         | 0.51      | 0:00:28  | 0.0  | y          | y      |
| 450 | Krefeld   | 1000                    | 1.091           | 1.34      | 1.3       | 4         | 4         | 0.49      | 0:01:07  | 0.0  | y          | y      |
| 451 | Münster   | 1000                    | 1.047           | 1.0       | 1.3       | 2         | 2         | 0.38      | 0:00:09  | 0.0  | y          | y      |
| 452 | Paderborn | 1000                    | 1.052           | 1.0       | 1.3       | 2         | 2         | 0.35      | 0:00:08  | 0.0  | y          | y      |
| 453 | Detmold   | 1000                    | 1.042           | 1.0       | 1.3       | 2         | 2         | 0.43      | 0:00:09  | 0.0  | y          | y      |

| #   | <i>cn</i> | Network characteristics |                 |           |           |           |           |           | Solution |     | Simulation |        |
|-----|-----------|-------------------------|-----------------|-----------|-----------|-----------|-----------|-----------|----------|-----|------------|--------|
|     |           | <i>bu</i>               | $\frac{nl}{bu}$ | <i>lf</i> | <i>tr</i> | <i>lt</i> | <i>tt</i> | <i>as</i> | Time     | Gap | Volt       | Ampere |
| 454 | Bielefeld | 1000                    | 1.040           | 1.0       | 1.3       | 2         | 2         | 0.31      | 0:00:09  | 0.0 | y          | y      |
| 455 | Gütersloh | 1000                    | 1.068           | 1.0       | 1.3       | 2         | 2         | 0.38      | 0:00:11  | 0.0 | y          | y      |
| 456 | Soest     | 1000                    | 1.042           | 1.0       | 1.3       | 2         | 2         | 0.29      | 0:00:05  | 0.0 | y          | y      |
| 457 | Dortmund  | 1000                    | 1.055           | 1.0       | 1.3       | 2         | 2         | 0.37      | 0:00:08  | 0.0 | y          | y      |
| 458 | Kassel    | 1000                    | 1.049           | 1.0       | 1.3       | 2         | 2         | 0.38      | 0:00:08  | 0.0 | y          | y      |
| 459 | Hannover  | 1000                    | 1.067           | 1.0       | 1.3       | 2         | 2         | 0.45      | 0:00:10  | 0.0 | y          | y      |
| 460 | Krefeld   | 1000                    | 1.092           | 1.0       | 1.3       | 2         | 2         | 0.3       | 0:00:10  | 0.0 | y          | y      |
| 461 | Münster   | 1000                    | 1.047           | 1.0       | 1.3       | 2         | 2         | 0.4       | 0:00:10  | 0.0 | y          | y      |
| 462 | Paderborn | 1000                    | 1.052           | 1.0       | 1.3       | 2         | 2         | 0.34      | 0:00:09  | 0.0 | y          | y      |
| 463 | Detmold   | 1000                    | 1.042           | 1.0       | 1.3       | 2         | 2         | 0.46      | 0:00:11  | 0.0 | y          | y      |
| 464 | Bielefeld | 1000                    | 1.040           | 1.0       | 1.3       | 2         | 2         | 0.34      | 0:00:08  | 0.0 | y          | y      |
| 465 | Gütersloh | 1000                    | 1.068           | 1.0       | 1.3       | 2         | 2         | 0.4       | 0:00:13  | 0.0 | y          | y      |
| 466 | Soest     | 1000                    | 1.042           | 1.0       | 1.3       | 2         | 2         | 0.34      | 0:00:10  | 0.0 | y          | y      |
| 467 | Dortmund  | 1000                    | 1.055           | 1.0       | 1.3       | 2         | 2         | 0.44      | 0:00:21  | 0.0 | y          | y      |
| 468 | Kassel    | 1000                    | 1.049           | 1.0       | 1.3       | 2         | 2         | 0.38      | 0:00:16  | 0.0 | y          | y      |
| 469 | Hannover  | 1000                    | 1.067           | 1.0       | 1.3       | 2         | 2         | 0.45      | 0:00:20  | 0.0 | y          | y      |
| 470 | Krefeld   | 1000                    | 1.091           | 1.0       | 1.3       | 2         | 2         | 0.36      | 0:00:13  | 0.0 | y          | y      |
| 471 | Münster   | 1000                    | 1.047           | 1.0       | 1.3       | 2         | 2         | 0.44      | 0:00:18  | 0.0 | y          | y      |
| 472 | Paderborn | 1000                    | 1.052           | 1.0       | 1.3       | 2         | 2         | 0.45      | 0:00:23  | 0.0 | y          | y      |
| 473 | Detmold   | 1000                    | 1.042           | 1.0       | 1.3       | 2         | 2         | 0.52      | 0:00:08  | 0.0 | y          | y      |
| 474 | Bielefeld | 1000                    | 1.040           | 1.0       | 1.3       | 2         | 2         | 0.43      | 0:00:16  | 0.0 | y          | y      |
| 475 | Gütersloh | 1000                    | 1.069           | 1.0       | 1.3       | 2         | 2         | 0.47      | 0:00:34  | 0.0 | y          | y      |
| 476 | Soest     | 1000                    | 1.042           | 1.0       | 1.3       | 2         | 2         | 0.45      | 0:00:17  | 0.0 | y          | y      |
| 477 | Dortmund  | 1000                    | 1.055           | 1.0       | 1.3       | 2         | 2         | 0.45      | 0:00:16  | 0.0 | y          | y      |
| 478 | Kassel    | 1000                    | 1.047           | 1.0       | 1.3       | 2         | 2         | 0.4       | 0:00:11  | 0.0 | y          | y      |
| 479 | Hannover  | 1000                    | 1.068           | 1.0       | 1.3       | 2         | 2         | 0.45      | 0:01:01  | 0.0 | y          | y      |
| 480 | Krefeld   | 1000                    | 1.091           | 1.0       | 1.3       | 2         | 2         | 0.44      | 0:00:18  | 0.0 | y          | y      |
| 481 | Münster   | 1000                    | 1.048           | 1.0       | 1.3       | 3         | 3         | 0.47      | 0:00:06  | 0.0 | y          | y      |
| 482 | Paderborn | 1000                    | 1.052           | 1.0       | 1.3       | 3         | 3         | 0.39      | 0:00:08  | 0.0 | y          | y      |
| 483 | Detmold   | 1000                    | 1.042           | 1.0       | 1.3       | 3         | 3         | 0.46      | 0:00:10  | 0.0 | y          | y      |
| 484 | Bielefeld | 1000                    | 1.041           | 1.0       | 1.3       | 3         | 3         | 0.33      | 0:00:08  | 0.0 | y          | y      |
| 485 | Gütersloh | 1000                    | 1.069           | 1.0       | 1.3       | 3         | 3         | 0.36      | 0:00:10  | 0.0 | y          | y      |
| 486 | Soest     | 1000                    | 1.042           | 1.0       | 1.3       | 3         | 3         | 0.32      | 0:00:05  | 0.0 | y          | y      |
| 487 | Dortmund  | 1000                    | 1.055           | 1.0       | 1.3       | 3         | 3         | 0.41      | 0:00:13  | 0.0 | y          | y      |
| 488 | Kassel    | 1000                    | 1.049           | 1.0       | 1.3       | 3         | 3         | 0.42      | 0:00:08  | 0.0 | y          | y      |
| 489 | Hannover  | 1000                    | 1.067           | 1.0       | 1.3       | 3         | 3         | 0.49      | 0:00:13  | 0.0 | y          | y      |
| 490 | Krefeld   | 1000                    | 1.092           | 1.0       | 1.3       | 3         | 3         | 0.33      | 0:00:20  | 0.0 | y          | y      |
| 491 | Münster   | 1000                    | 1.046           | 1.0       | 1.3       | 3         | 3         | 0.39      | 0:00:14  | 0.0 | y          | y      |
| 492 | Paderborn | 1000                    | 1.051           | 1.0       | 1.3       | 3         | 3         | 0.45      | 0:00:13  | 0.0 | y          | y      |
| 493 | Detmold   | 1000                    | 1.042           | 1.0       | 1.3       | 3         | 3         | 0.49      | 0:00:11  | 0.0 | y          | y      |
| 494 | Bielefeld | 1000                    | 1.041           | 1.0       | 1.3       | 3         | 3         | 0.39      | 0:00:11  | 0.0 | y          | y      |
| 495 | Gütersloh | 1000                    | 1.068           | 1.0       | 1.3       | 3         | 3         | 0.44      | 0:00:31  | 0.0 | y          | y      |
| 496 | Soest     | 1000                    | 1.042           | 1.0       | 1.3       | 3         | 3         | 0.38      | 0:00:13  | 0.0 | y          | y      |
| 497 | Dortmund  | 1000                    | 1.055           | 1.0       | 1.3       | 3         | 3         | 0.47      | 0:00:17  | 0.0 | y          | y      |
| 498 | Kassel    | 1000                    | 1.047           | 1.0       | 1.3       | 3         | 3         | 0.39      | 0:00:17  | 0.0 | y          | y      |
| 499 | Hannover  | 1000                    | 1.067           | 1.0       | 1.3       | 3         | 3         | 0.49      | 0:00:11  | 0.0 | y          | y      |
| 500 | Krefeld   | 1000                    | 1.092           | 1.0       | 1.3       | 3         | 3         | 0.41      | 0:01:04  | 0.0 | y          | y      |
| 501 | Münster   | 1000                    | 1.047           | 1.0       | 1.3       | 3         | 3         | 0.47      | 0:01:19  | 0.0 | y          | y      |
| 502 | Paderborn | 1000                    | 1.052           | 1.0       | 1.3       | 3         | 3         | 0.48      | 0:00:14  | 0.0 | y          | y      |
| 503 | Detmold   | 1000                    | 1.042           | 1.0       | 1.3       | 3         | 3         | 0.55      | 0:00:10  | 0.0 | y          | y      |
| 504 | Bielefeld | 1000                    | 1.040           | 1.0       | 1.3       | 3         | 3         | 0.46      | 0:00:42  | 0.0 | y          | y      |
| 505 | Gütersloh | 1000                    | 1.068           | 1.0       | 1.3       | 3         | 3         | 0.52      | 0:00:22  | 0.0 | y          | y      |

| #   | Network characteristics |           |                 |           |           |           |           |           | Solution |      | Simulation |        |
|-----|-------------------------|-----------|-----------------|-----------|-----------|-----------|-----------|-----------|----------|------|------------|--------|
|     | <i>cn</i>               | <i>bu</i> | $\frac{nl}{bu}$ | <i>lf</i> | <i>tr</i> | <i>lt</i> | <i>tt</i> | <i>as</i> | Time     | Gap  | Volt       | Ampere |
| 506 | Soest                   | 1000      | 1.041           | 1.0       | 1.3       | 3         | 3         | 0.43      | 0:00:07  | 0.0  | y          | y      |
| 507 | Dortmund                | 1000      | 1.055           | 1.0       | 1.3       | 3         | 3         | 0.48      | 0:00:17  | 0.0  | y          | y      |
| 508 | Kassel                  | 1000      | 1.047           | 1.0       | 1.3       | 3         | 3         | 0.43      | 0:00:11  | 0.0  | y          | y      |
| 509 | Hannover                | 1000      | 1.067           | 1.0       | 1.3       | 3         | 3         | 0.57      | 0:00:12  | 0.45 | y          | y      |
| 510 | Krefeld                 | 1000      | 1.092           | 1.0       | 1.3       | 3         | 3         | 0.43      | 0:00:20  | 0.0  | y          | y      |
| 511 | Münster                 | 1000      | 1.047           | 1.0       | 1.3       | 4         | 4         | 0.44      | 0:00:16  | 0.0  | y          | y      |
| 512 | Paderborn               | 1000      | 1.051           | 1.0       | 1.3       | 4         | 4         | 0.39      | 0:00:06  | 0.0  | y          | y      |
| 513 | Detmold                 | 1000      | 1.042           | 1.0       | 1.3       | 4         | 4         | 0.49      | 0:00:09  | 0.0  | y          | y      |
| 514 | Bielefeld               | 1000      | 1.040           | 1.0       | 1.3       | 4         | 4         | 0.55      | 0:00:06  | 0.0  | y          | y      |
| 515 | Gütersloh               | 1000      | 1.068           | 1.0       | 1.3       | 4         | 4         | 0.44      | 0:00:32  | 0.0  | y          | y      |
| 516 | Soest                   | 1000      | 1.042           | 1.0       | 1.3       | 4         | 4         | 0.35      | 0:00:07  | 0.0  | y          | y      |
| 517 | Dortmund                | 1000      | 1.055           | 1.0       | 1.3       | 4         | 4         | 0.44      | 0:00:13  | 0.0  | y          | y      |
| 518 | Kassel                  | 1000      | 1.049           | 1.0       | 1.3       | 4         | 4         | 0.44      | 0:00:12  | 0.0  | y          | y      |
| 519 | Hannover                | 1000      | 1.067           | 1.0       | 1.3       | 4         | 4         | 0.51      | 0:00:06  | 0.0  | y          | y      |
| 520 | Krefeld                 | 1000      | 1.092           | 1.0       | 1.3       | 4         | 4         | 0.36      | 0:00:12  | 0.0  | y          | y      |
| 521 | Münster                 | 1000      | 1.047           | 1.0       | 1.3       | 4         | 4         | 0.46      | 0:00:18  | 0.0  | y          | y      |
| 522 | Paderborn               | 1000      | 1.052           | 1.0       | 1.3       | 4         | 4         | 0.4       | 0:00:10  | 0.0  | y          | y      |
| 523 | Detmold                 | 1000      | 1.042           | 1.0       | 1.3       | 4         | 4         | 0.52      | 0:00:11  | 0.0  | y          | y      |
| 524 | Bielefeld               | 1000      | 1.040           | 1.0       | 1.3       | 4         | 4         | 0.4       | 0:00:17  | 0.0  | y          | y      |
| 525 | Gütersloh               | 1000      | 1.068           | 1.0       | 1.3       | 4         | 4         | 0.46      | 0:00:14  | 0.0  | y          | y      |
| 526 | Soest                   | 1000      | 1.041           | 1.0       | 1.3       | 4         | 4         | 0.48      | 0:00:09  | 0.0  | y          | y      |
| 527 | Dortmund                | 1000      | 1.055           | 1.0       | 1.3       | 4         | 4         | 0.5       | 0:00:21  | 0.0  | y          | y      |
| 528 | Kassel                  | 1000      | 1.047           | 1.0       | 1.3       | 4         | 4         | 0.42      | 0:00:07  | 0.0  | y          | y      |
| 529 | Hannover                | 1000      | 1.067           | 1.0       | 1.3       | 4         | 4         | 0.52      | 0:00:17  | 0.0  | y          | y      |
| 530 | Krefeld                 | 1000      | 1.092           | 1.0       | 1.3       | 4         | 4         | 0.43      | 0:00:32  | 0.0  | y          | y      |
| 531 | Münster                 | 1000      | 1.047           | 1.0       | 1.3       | 4         | 4         | 0.49      | 0:07:17  | 0.31 | y          | y      |
| 532 | Paderborn               | 1000      | 1.053           | 1.0       | 1.3       | 4         | 4         | 0.46      | 0:02:07  | 0.0  | n          | y      |
| 533 | Detmold                 | 1000      | 1.042           | 1.0       | 1.3       | 4         | 4         | 0.58      | 0:00:17  | 0.0  | y          | y      |
| 534 | Bielefeld               | 1000      | 1.040           | 1.0       | 1.3       | 4         | 4         | 0.56      | 0:00:12  | 0.0  | y          | y      |
| 535 | Gütersloh               | 1000      | 1.068           | 1.0       | 1.3       | 4         | 4         | 0.54      | 0:00:26  | 0.0  | y          | y      |
| 536 | Soest                   | 1000      | 1.042           | 1.0       | 1.3       | 4         | 4         | 0.5       | 0:00:17  | 0.0  | y          | y      |
| 537 | Dortmund                | 1000      | 1.055           | 1.0       | 1.3       | 4         | 4         | 0.5       | 0:00:26  | 0.0  | y          | y      |
| 538 | Kassel                  | 1000      | 1.049           | 1.0       | 1.3       | 4         | 4         | 0.53      | 0:00:28  | 0.0  | y          | y      |
| 539 | Hannover                | 1000      | 1.067           | 1.0       | 1.3       | 4         | 4         | 0.6       | 0:00:16  | 0.0  | y          | y      |
| 540 | Krefeld                 | 1000      | 1.092           | 1.0       | 1.3       | 4         | 4         | 0.45      | 0:00:21  | 0.38 | y          | y      |
| 541 | Münster                 | 1000      | 1.046           | 0.83      | 0.8       | 2         | 2         | 0.51      | 0:00:03  | 0.0  | y          | y      |
| 542 | Paderborn               | 1000      | 1.048           | 0.83      | 0.8       | 2         | 2         | 0.51      | 0:00:04  | 0.0  | y          | y      |
| 543 | Detmold                 | 1000      | 1.038           | 0.83      | 0.8       | 2         | 2         | 0.39      | 0:00:03  | 0.0  | y          | y      |
| 544 | Bielefeld               | 1000      | 1.037           | 0.83      | 0.8       | 2         | 2         | 0.56      | 0:00:03  | 0.0  | y          | y      |
| 545 | Gütersloh               | 1000      | 1.065           | 0.83      | 0.8       | 2         | 2         | 0.35      | 0:00:06  | 0.0  | y          | y      |
| 546 | Soest                   | 1000      | 1.038           | 0.83      | 0.8       | 2         | 2         | 0.42      | 0:00:03  | 0.0  | y          | y      |
| 547 | Dortmund                | 1000      | 1.051           | 0.83      | 0.8       | 2         | 2         | 0.42      | 0:00:04  | 0.0  | y          | y      |
| 548 | Kassel                  | 1000      | 1.045           | 0.83      | 0.8       | 2         | 2         | 0.5       | 0:00:05  | 0.0  | y          | y      |
| 549 | Hannover                | 1000      | 1.062           | 0.83      | 0.8       | 2         | 2         | 0.53      | 0:00:06  | 0.0  | y          | y      |
| 550 | Krefeld                 | 1000      | 1.087           | 0.83      | 0.8       | 2         | 2         | 0.37      | 0:00:08  | 0.0  | y          | y      |
| 551 | Münster                 | 1000      | 1.046           | 0.83      | 0.8       | 2         | 2         | 0.4       | 0:00:04  | 0.0  | y          | y      |
| 552 | Paderborn               | 1000      | 1.048           | 0.83      | 0.8       | 2         | 2         | 0.54      | 0:00:06  | 0.0  | y          | y      |
| 553 | Detmold                 | 1000      | 1.038           | 0.83      | 0.8       | 2         | 2         | 0.48      | 0:00:03  | 0.0  | y          | y      |
| 554 | Bielefeld               | 1000      | 1.037           | 0.83      | 0.8       | 2         | 2         | 0.56      | 0:00:07  | 0.0  | y          | y      |
| 555 | Gütersloh               | 1000      | 1.065           | 0.83      | 0.8       | 2         | 2         | 0.45      | 0:00:08  | 0.0  | y          | y      |
| 556 | Soest                   | 1000      | 1.038           | 0.83      | 0.8       | 2         | 2         | 0.4       | 0:00:16  | 0.0  | y          | y      |
| 557 | Dortmund                | 1000      | 1.051           | 0.83      | 0.8       | 2         | 2         | 0.51      | 0:00:04  | 0.0  | y          | y      |

| #   | <i>cn</i> | Network characteristics |                 |           |           |           |           |           | Solution |      | Simulation |        |
|-----|-----------|-------------------------|-----------------|-----------|-----------|-----------|-----------|-----------|----------|------|------------|--------|
|     |           | <i>bu</i>               | $\frac{nl}{bu}$ | <i>lf</i> | <i>tr</i> | <i>lt</i> | <i>tt</i> | <i>as</i> | Time     | Gap  | Volt       | Ampere |
| 558 | Kassel    | 1000                    | 1.044           | 0.83      | 0.8       | 2         | 2         | 0.46      | 0:00:21  | 0.0  | y          | y      |
| 559 | Hannover  | 1000                    | 1.062           | 0.83      | 0.8       | 2         | 2         | 0.53      | 0:00:04  | 0.0  | y          | y      |
| 560 | Krefeld   | 1000                    | 1.087           | 0.83      | 0.8       | 2         | 2         | 0.48      | 0:00:33  | 0.0  | y          | y      |
| 561 | Münster   | 1000                    | 1.046           | 0.83      | 0.8       | 2         | 2         | 0.51      | 0:00:06  | 0.0  | y          | y      |
| 562 | Paderborn | 1000                    | 1.048           | 0.83      | 0.8       | 2         | 2         | 0.52      | 0:00:05  | 0.0  | y          | y      |
| 563 | Detmold   | 1000                    | 1.038           | 0.83      | 0.8       | 2         | 2         | 0.47      | 0:00:21  | 0.0  | y          | y      |
| 564 | Bielefeld | 1000                    | 1.037           | 0.83      | 0.8       | 2         | 2         | 0.42      | 0:00:07  | 0.0  | y          | y      |
| 565 | Gütersloh | 1000                    | 1.065           | 0.83      | 0.8       | 2         | 2         | 0.5       | 0:01:21  | 0.0  | y          | y      |
| 566 | Soest     | 1000                    | 1.038           | 0.83      | 0.8       | 2         | 2         | 0.48      | 0:00:23  | 0.0  | y          | y      |
| 567 | Dortmund  | 1000                    | 1.051           | 0.83      | 0.8       | 2         | 2         | 0.5       | 0:00:04  | 0.0  | y          | y      |
| 568 | Kassel    | 1000                    | 1.044           | 0.83      | 0.8       | 2         | 2         | 0.5       | 0:00:19  | 0.0  | y          | y      |
| 569 | Hannover  | 1000                    | 1.062           | 0.83      | 0.8       | 2         | 2         | 0.55      | 0:00:09  | 0.0  | y          | y      |
| 570 | Krefeld   | 1000                    | 1.087           | 0.83      | 0.8       | 2         | 2         | 0.47      | 0:00:44  | 0.0  | y          | y      |
| 571 | Münster   | 1000                    | 1.045           | 0.83      | 0.8       | 3         | 3         | 0.38      | 0:00:05  | 0.0  | y          | y      |
| 572 | Paderborn | 1000                    | 1.049           | 0.83      | 0.8       | 3         | 3         | 0.35      | 0:00:07  | 0.0  | y          | y      |
| 573 | Detmold   | 1000                    | 1.038           | 0.83      | 0.8       | 3         | 3         | 0.43      | 0:00:06  | 0.0  | y          | y      |
| 574 | Bielefeld | 1000                    | 1.036           | 0.83      | 0.8       | 3         | 3         | 0.42      | 0:00:04  | 0.0  | y          | y      |
| 575 | Gütersloh | 1000                    | 1.065           | 0.83      | 0.8       | 3         | 3         | 0.39      | 0:00:18  | 0.0  | y          | y      |
| 576 | Soest     | 1000                    | 1.038           | 0.83      | 0.8       | 3         | 3         | 0.51      | 0:00:03  | 0.47 | y          | y      |
| 577 | Dortmund  | 1000                    | 1.051           | 0.83      | 0.8       | 3         | 3         | 0.46      | 0:00:09  | 0.0  | y          | y      |
| 578 | Kassel    | 1000                    | 1.044           | 0.83      | 0.8       | 3         | 3         | 0.46      | 0:00:06  | 0.0  | y          | y      |
| 579 | Hannover  | 1000                    | 1.062           | 0.83      | 0.8       | 3         | 3         | 0.67      | 0:00:05  | 0.0  | y          | y      |
| 580 | Krefeld   | 1000                    | 1.087           | 0.83      | 0.8       | 3         | 3         | 0.41      | 0:00:10  | 0.0  | y          | y      |
| 581 | Münster   | 1000                    | 1.046           | 0.83      | 0.8       | 3         | 3         | 0.44      | 0:00:16  | 0.0  | y          | y      |
| 582 | Paderborn | 1000                    | 1.048           | 0.83      | 0.8       | 3         | 3         | 0.58      | 0:00:07  | 0.37 | y          | y      |
| 583 | Detmold   | 1000                    | 1.038           | 0.83      | 0.8       | 3         | 3         | 0.52      | 0:00:04  | 0.0  | y          | y      |
| 584 | Bielefeld | 1000                    | 1.037           | 0.83      | 0.8       | 3         | 3         | 0.59      | 0:00:07  | 0.0  | y          | y      |
| 585 | Gütersloh | 1000                    | 1.065           | 0.83      | 0.8       | 3         | 3         | 0.48      | 0:00:07  | 0.0  | y          | y      |
| 586 | Soest     | 1000                    | 1.038           | 0.83      | 0.8       | 3         | 3         | 0.43      | 0:00:23  | 0.0  | y          | y      |
| 587 | Dortmund  | 1000                    | 1.051           | 0.83      | 0.8       | 3         | 3         | 0.54      | 0:00:08  | 0.0  | y          | y      |
| 588 | Kassel    | 1000                    | 1.044           | 0.83      | 0.8       | 3         | 3         | 0.5       | 0:00:10  | 0.0  | y          | y      |
| 589 | Hannover  | 1000                    | 1.062           | 0.83      | 0.8       | 3         | 3         | 0.56      | 0:00:06  | 0.0  | y          | y      |
| 590 | Krefeld   | 1000                    | 1.087           | 0.83      | 0.8       | 3         | 3         | 0.51      | 0:00:09  | 0.0  | y          | y      |
| 591 | Münster   | 1000                    | 1.046           | 0.83      | 0.8       | 3         | 3         | 0.54      | 0:00:16  | 0.0  | y          | y      |
| 592 | Paderborn | 1000                    | 1.048           | 0.83      | 0.8       | 3         | 3         | 0.56      | 0:00:07  | 0.0  | y          | y      |
| 593 | Detmold   | 1000                    | 1.038           | 0.83      | 0.8       | 3         | 3         | 0.51      | 0:00:14  | 0.0  | y          | y      |
| 594 | Bielefeld | 1000                    | 1.037           | 0.83      | 0.8       | 3         | 3         | 0.45      | 0:00:06  | 0.0  | y          | y      |
| 595 | Gütersloh | 1000                    | 1.065           | 0.83      | 0.8       | 3         | 3         | 0.53      | 0:01:13  | 0.0  | y          | y      |
| 596 | Soest     | 1000                    | 1.038           | 0.83      | 0.8       | 3         | 3         | 0.51      | 0:00:11  | 0.0  | y          | y      |
| 597 | Dortmund  | 1000                    | 1.051           | 0.83      | 0.8       | 3         | 3         | 0.54      | 0:00:11  | 0.0  | y          | y      |
| 598 | Kassel    | 1000                    | 1.044           | 0.83      | 0.8       | 3         | 3         | 0.54      | 0:00:27  | 0.33 | y          | y      |
| 599 | Hannover  | 1000                    | 1.062           | 0.83      | 0.8       | 3         | 3         | 0.58      | 0:00:06  | 0.0  | y          | y      |
| 600 | Krefeld   | 1000                    | 1.087           | 0.83      | 0.8       | 3         | 3         | 0.49      | 0:00:14  | 0.0  | y          | y      |
| 601 | Münster   | 1000                    | 1.046           | 0.83      | 0.8       | 4         | 4         | 0.56      | 0:00:15  | 0.0  | y          | y      |
| 602 | Paderborn | 1000                    | 1.048           | 0.83      | 0.8       | 4         | 4         | 0.55      | 0:00:10  | 0.0  | y          | y      |
| 603 | Detmold   | 1000                    | 1.038           | 0.83      | 0.8       | 4         | 4         | 0.46      | 0:00:03  | 0.0  | y          | y      |
| 604 | Bielefeld | 1000                    | 1.036           | 0.83      | 0.8       | 4         | 4         | 0.62      | 0:00:07  | 0.0  | y          | y      |
| 605 | Gütersloh | 1000                    | 1.065           | 0.83      | 0.8       | 4         | 4         | 0.42      | 0:00:25  | 0.0  | y          | y      |
| 606 | Soest     | 1000                    | 1.038           | 0.83      | 0.8       | 4         | 4         | 0.53      | 0:00:06  | 0.0  | y          | y      |
| 607 | Dortmund  | 1000                    | 1.051           | 0.83      | 0.8       | 4         | 4         | 0.56      | 0:00:05  | 0.0  | y          | y      |
| 608 | Kassel    | 1000                    | 1.044           | 0.83      | 0.8       | 4         | 4         | 0.44      | 0:00:07  | 0.0  | y          | y      |
| 609 | Hannover  | 1000                    | 1.062           | 0.83      | 0.8       | 4         | 4         | 0.67      | 0:00:05  | 0.0  | y          | y      |

| #   | <i>cn</i> | Network characteristics |                 |           |           |           |           |           | Solution |      | Simulation |        |
|-----|-----------|-------------------------|-----------------|-----------|-----------|-----------|-----------|-----------|----------|------|------------|--------|
|     |           | <i>bu</i>               | $\frac{nl}{bu}$ | <i>lf</i> | <i>tr</i> | <i>lt</i> | <i>tt</i> | <i>as</i> | Time     | Gap  | Volt       | Ampere |
| 610 | Krefeld   | 1000                    | 1.087           | 0.83      | 0.8       | 4         | 4         | 0.44      | 0:00:06  | 0.0  | y          | y      |
| 611 | Münster   | 1000                    | 1.046           | 0.83      | 0.8       | 4         | 4         | 0.47      | 0:00:10  | 0.0  | y          | y      |
| 612 | Paderborn | 1000                    | 1.048           | 0.83      | 0.8       | 4         | 4         | 0.61      | 0:00:10  | 0.0  | y          | y      |
| 613 | Detmold   | 1000                    | 1.038           | 0.83      | 0.8       | 4         | 4         | 0.54      | 0:00:08  | 0.0  | y          | y      |
| 614 | Bielefeld | 1000                    | 1.037           | 0.83      | 0.8       | 4         | 4         | 0.62      | 0:00:07  | 0.0  | y          | y      |
| 615 | Gütersloh | 1000                    | 1.065           | 0.83      | 0.8       | 4         | 4         | 0.51      | 0:00:12  | 0.0  | y          | y      |
| 616 | Soest     | 1000                    | 1.038           | 0.83      | 0.8       | 4         | 4         | 0.46      | 0:00:19  | 0.0  | y          | y      |
| 617 | Dortmund  | 1000                    | 1.051           | 0.83      | 0.8       | 4         | 4         | 0.57      | 0:00:06  | 0.0  | y          | y      |
| 618 | Kassel    | 1000                    | 1.045           | 0.83      | 0.8       | 4         | 4         | 0.62      | 0:00:07  | 0.0  | y          | y      |
| 619 | Hannover  | 1000                    | 1.062           | 0.83      | 0.8       | 4         | 4         | 0.52      | 0:00:12  | 0.0  | y          | y      |
| 620 | Krefeld   | 1000                    | 1.087           | 0.83      | 0.8       | 4         | 4         | 0.54      | 0:00:44  | 0.0  | y          | y      |
| 621 | Münster   | 1000                    | 1.046           | 0.83      | 0.8       | 4         | 4         | 0.57      | 0:00:06  | 0.0  | y          | y      |
| 622 | Paderborn | 1000                    | 1.048           | 0.83      | 0.8       | 4         | 4         | 0.59      | 0:00:08  | 0.0  | y          | y      |
| 623 | Detmold   | 1000                    | 1.038           | 0.83      | 0.8       | 4         | 4         | 0.53      | 0:00:08  | 0.0  | y          | y      |
| 624 | Bielefeld | 1000                    | 1.036           | 0.83      | 0.8       | 4         | 4         | 0.56      | 0:00:42  | 0.0  | y          | y      |
| 625 | Gütersloh | 1000                    | 1.065           | 0.83      | 0.8       | 4         | 4         | 0.56      | 0:03:26  | 0.46 | y          | y      |
| 626 | Soest     | 1000                    | 1.038           | 0.83      | 0.8       | 4         | 4         | 0.54      | 0:00:15  | 0.0  | y          | y      |
| 627 | Dortmund  | 1000                    | 1.051           | 0.83      | 0.8       | 4         | 4         | 0.49      | 0:00:06  | 0.0  | y          | y      |
| 628 | Kassel    | 1000                    | 1.045           | 0.83      | 0.8       | 4         | 4         | 0.55      | 0:00:15  | 0.0  | y          | y      |
| 629 | Hannover  | 1000                    | 1.062           | 0.83      | 0.8       | 4         | 4         | 0.61      | 0:00:07  | 0.0  | y          | y      |
| 630 | Krefeld   | 1000                    | 1.087           | 0.83      | 0.8       | 4         | 4         | 0.53      | 0:00:58  | 0.0  | y          | y      |
| 631 | Münster   | 1000                    | 1.046           | 1.34      | 0.8       | 2         | 2         | 0.51      | 0:00:05  | 0.0  | y          | y      |
| 632 | Paderborn | 1000                    | 1.048           | 1.34      | 0.8       | 2         | 2         | 0.51      | 0:00:03  | 0.0  | y          | y      |
| 633 | Detmold   | 1000                    | 1.039           | 1.34      | 0.8       | 2         | 2         | 0.47      | 0:00:04  | 0.0  | y          | y      |
| 634 | Bielefeld | 1000                    | 1.037           | 1.34      | 0.8       | 2         | 2         | 0.56      | 0:00:07  | 0.0  | y          | y      |
| 635 | Gütersloh | 1000                    | 1.065           | 1.34      | 0.8       | 2         | 2         | 0.35      | 0:00:06  | 0.0  | y          | y      |
| 636 | Soest     | 1000                    | 1.038           | 1.34      | 0.8       | 2         | 2         | 0.47      | 0:00:03  | 0.0  | y          | y      |
| 637 | Dortmund  | 1000                    | 1.051           | 1.34      | 0.8       | 2         | 2         | 0.42      | 0:00:26  | 0.0  | y          | y      |
| 638 | Kassel    | 1000                    | 1.044           | 1.34      | 0.8       | 2         | 2         | 0.38      | 0:00:48  | 0.0  | y          | y      |
| 639 | Hannover  | 1000                    | 1.062           | 1.34      | 0.8       | 2         | 2         | 0.53      | 0:00:06  | 0.0  | y          | y      |
| 640 | Krefeld   | 1000                    | 1.087           | 1.34      | 0.8       | 2         | 2         | 0.37      | 0:00:09  | 0.0  | y          | y      |
| 641 | Münster   | 1000                    | 1.046           | 1.34      | 0.8       | 2         | 2         | 0.4       | 0:00:10  | 0.0  | y          | y      |
| 642 | Paderborn | 1000                    | 1.048           | 1.34      | 0.8       | 2         | 2         | 0.54      | 0:00:27  | 0.37 | n          | y      |
| 643 | Detmold   | 1000                    | 1.038           | 1.34      | 0.8       | 2         | 2         | 0.48      | 0:00:14  | 0.0  | y          | y      |
| 644 | Bielefeld | 1000                    | 1.037           | 1.34      | 0.8       | 2         | 2         | 0.52      | 0:00:22  | 0.0  | y          | y      |
| 645 | Gütersloh | 1000                    | 1.065           | 1.34      | 0.8       | 2         | 2         | 0.45      | 0:00:07  | 0.0  | y          | y      |
| 646 | Soest     | 1000                    | 1.038           | 1.34      | 0.8       | 2         | 2         | 0.4       | 0:00:18  | 0.0  | y          | y      |
| 647 | Dortmund  | 1000                    | 1.051           | 1.34      | 0.8       | 2         | 2         | 0.51      | 0:00:08  | 0.0  | y          | y      |
| 648 | Kassel    | 1000                    | 1.044           | 1.34      | 0.8       | 2         | 2         | 0.46      | 0:00:20  | 0.0  | y          | y      |
| 649 | Hannover  | 1000                    | 1.062           | 1.34      | 0.8       | 2         | 2         | 0.53      | 0:00:07  | 0.0  | y          | y      |
| 650 | Krefeld   | 1000                    | 1.087           | 1.34      | 0.8       | 2         | 2         | 0.4       | 0:00:06  | 0.0  | y          | y      |
| 651 | Münster   | 1000                    | 1.046           | 1.34      | 0.8       | 2         | 2         | 0.51      | 0:00:05  | 0.0  | y          | y      |
| 652 | Paderborn | 1000                    | 1.048           | 1.34      | 0.8       | 2         | 2         | 0.52      | 0:00:06  | 0.0  | y          | y      |
| 653 | Detmold   | 1000                    | 1.038           | 1.34      | 0.8       | 2         | 2         | 0.47      | 0:00:28  | 0.0  | y          | y      |
| 654 | Bielefeld | 1000                    | 1.037           | 1.34      | 0.8       | 2         | 2         | 0.42      | 0:00:21  | 0.0  | y          | y      |
| 655 | Gütersloh | 1000                    | 1.065           | 1.34      | 0.8       | 2         | 2         | 0.5       | 0:12:39  | 0.49 | y          | y      |
| 656 | Soest     | 1000                    | 1.038           | 1.34      | 0.8       | 2         | 2         | 0.48      | 0:00:17  | 0.0  | y          | y      |
| 657 | Dortmund  | 1000                    | 1.051           | 1.34      | 0.8       | 2         | 2         | 0.5       | 0:00:17  | 0.0  | y          | y      |
| 658 | Kassel    | 1000                    | 1.044           | 1.34      | 0.8       | 2         | 2         | 0.5       | 0:01:43  | 0.39 | y          | y      |
| 659 | Hannover  | 1000                    | 1.062           | 1.34      | 0.8       | 2         | 2         | 0.52      | 0:00:06  | 0.0  | y          | y      |
| 660 | Krefeld   | 1000                    | 1.087           | 1.34      | 0.8       | 2         | 2         | 0.52      | 0:00:49  | 0.0  | y          | y      |
| 661 | Münster   | 1000                    | 1.046           | 1.34      | 0.8       | 3         | 3         | 0.54      | 0:00:07  | 0.0  | y          | y      |

| #   | <i>cn</i> | Network characteristics |                 |           |           |           |           |           | Solution |      | Simulation |        |
|-----|-----------|-------------------------|-----------------|-----------|-----------|-----------|-----------|-----------|----------|------|------------|--------|
|     |           | <i>bu</i>               | $\frac{nl}{bu}$ | <i>lf</i> | <i>tr</i> | <i>lt</i> | <i>tt</i> | <i>as</i> | Time     | Gap  | Volt       | Ampere |
| 662 | Paderborn | 1000                    | 1.049           | 1.34      | 0.8       | 3         | 3         | 0.35      | 0:00:06  | 0.0  | y          | y      |
| 663 | Detmold   | 1000                    | 1.038           | 1.34      | 0.8       | 3         | 3         | 0.43      | 0:00:04  | 0.0  | y          | y      |
| 664 | Bielefeld | 1000                    | 1.038           | 1.34      | 0.8       | 3         | 3         | 0.51      | 0:00:07  | 0.0  | y          | y      |
| 665 | Gütersloh | 1000                    | 1.065           | 1.34      | 0.8       | 3         | 3         | 0.39      | 0:00:10  | 0.0  | y          | y      |
| 666 | Soest     | 1000                    | 1.038           | 1.34      | 0.8       | 3         | 3         | 0.51      | 0:00:05  | 0.0  | y          | y      |
| 667 | Dortmund  | 1000                    | 1.051           | 1.34      | 0.8       | 3         | 3         | 0.46      | 0:01:07  | 0.0  | y          | y      |
| 668 | Kassel    | 1000                    | 1.045           | 1.34      | 0.8       | 3         | 3         | 0.52      | 0:00:07  | 0.0  | y          | y      |
| 669 | Hannover  | 1000                    | 1.062           | 1.34      | 0.8       | 3         | 3         | 0.67      | 0:00:04  | 0.0  | y          | y      |
| 670 | Krefeld   | 1000                    | 1.087           | 1.34      | 0.8       | 3         | 3         | 0.41      | 0:00:15  | 0.0  | y          | y      |
| 671 | Münster   | 1000                    | 1.045           | 1.34      | 0.8       | 3         | 3         | 0.44      | 0:00:34  | 0.19 | y          | y      |
| 672 | Paderborn | 1000                    | 1.048           | 1.34      | 0.8       | 3         | 3         | 0.58      | 0:00:31  | 0.37 | n          | y      |
| 673 | Detmold   | 1000                    | 1.038           | 1.34      | 0.8       | 3         | 3         | 0.52      | 0:00:19  | 0.0  | y          | y      |
| 674 | Bielefeld | 1000                    | 1.037           | 1.34      | 0.8       | 3         | 3         | 0.59      | 0:00:12  | 0.0  | y          | y      |
| 675 | Gütersloh | 1000                    | 1.065           | 1.34      | 0.8       | 3         | 3         | 0.48      | 0:00:08  | 0.0  | y          | y      |
| 676 | Soest     | 1000                    | 1.038           | 1.34      | 0.8       | 3         | 3         | 0.43      | 0:02:30  | 0.14 | y          | y      |
| 677 | Dortmund  | 1000                    | 1.051           | 1.34      | 0.8       | 3         | 3         | 0.54      | 0:00:31  | 0.0  | y          | y      |
| 678 | Kassel    | 1000                    | 1.044           | 1.34      | 0.8       | 3         | 3         | 0.5       | 0:00:06  | 0.13 | y          | y      |
| 679 | Hannover  | 1000                    | 1.062           | 1.34      | 0.8       | 3         | 3         | 0.56      | 0:00:09  | 0.0  | y          | y      |
| 680 | Krefeld   | 1000                    | 1.087           | 1.34      | 0.8       | 3         | 3         | 0.51      | 0:00:28  | 0.0  | y          | y      |
| 681 | Münster   | 1000                    | 1.045           | 1.34      | 0.8       | 3         | 3         | 0.5       | 0:00:46  | 0.0  | y          | y      |
| 682 | Paderborn | 1000                    | 1.048           | 1.34      | 0.8       | 3         | 3         | 0.56      | 0:00:23  | 0.0  | n          | y      |
| 683 | Detmold   | 1000                    | 1.038           | 1.34      | 0.8       | 3         | 3         | 0.51      | 0:01:01  | 0.15 | y          | y      |
| 684 | Bielefeld | 1000                    | 1.037           | 1.34      | 0.8       | 3         | 3         | 0.45      | 0:00:28  | 0.0  | y          | y      |
| 685 | Gütersloh | 1000                    | 1.065           | 1.34      | 0.8       | 3         | 3         | 0.53      | 0:12:13  | 0.11 | y          | y      |
| 686 | Soest     | 1000                    | 1.038           | 1.34      | 0.8       | 3         | 3         | 0.51      | 0:00:18  | 0.0  | y          | y      |
| 687 | Dortmund  | 1000                    | 1.051           | 1.34      | 0.8       | 3         | 3         | 0.54      | 0:00:41  | 0.0  | y          | y      |
| 688 | Kassel    | 1000                    | 1.044           | 1.34      | 0.8       | 3         | 3         | 0.54      | 0:00:30  | 0.0  | y          | y      |
| 689 | Hannover  | 1000                    | 1.062           | 1.34      | 0.8       | 3         | 3         | 0.58      | 0:00:28  | 0.0  | y          | y      |
| 690 | Krefeld   | 1000                    | 1.087           | 1.34      | 0.8       | 3         | 3         | 0.5       | 0:07:09  | 0.0  | y          | y      |
| 691 | Münster   | 1000                    | 1.045           | 1.34      | 0.8       | 4         | 4         | 0.41      | 0:00:13  | 0.0  | y          | y      |
| 692 | Paderborn | 1000                    | 1.048           | 1.34      | 0.8       | 4         | 4         | 0.55      | 0:00:07  | 0.0  | y          | y      |
| 693 | Detmold   | 1000                    | 1.038           | 1.34      | 0.8       | 4         | 4         | 0.46      | 0:00:05  | 0.0  | y          | y      |
| 694 | Bielefeld | 1000                    | 1.037           | 1.34      | 0.8       | 4         | 4         | 0.6       | 0:00:17  | 0.0  | y          | y      |
| 695 | Gütersloh | 1000                    | 1.066           | 1.34      | 0.8       | 4         | 4         | 0.43      | 0:00:29  | 0.0  | y          | y      |
| 696 | Soest     | 1000                    | 1.038           | 1.34      | 0.8       | 4         | 4         | 0.53      | 0:00:08  | 0.0  | y          | y      |
| 697 | Dortmund  | 1000                    | 1.051           | 1.34      | 0.8       | 4         | 4         | 0.48      | 0:00:33  | 0.0  | y          | y      |
| 698 | Kassel    | 1000                    | 1.044           | 1.34      | 0.8       | 4         | 4         | 0.44      | 0:00:16  | 0.0  | y          | y      |
| 699 | Hannover  | 1000                    | 1.062           | 1.34      | 0.8       | 4         | 4         | 0.55      | 0:00:08  | 0.0  | y          | y      |
| 700 | Krefeld   | 1000                    | 1.087           | 1.34      | 0.8       | 4         | 4         | 0.44      | 0:00:09  | 0.0  | y          | y      |
| 701 | Münster   | 1000                    | 1.046           | 1.34      | 0.8       | 4         | 4         | 0.47      | 0:00:10  | 0.0  | y          | y      |
| 702 | Paderborn | 1000                    | 1.049           | 1.34      | 0.8       | 4         | 4         | 0.48      | 0:00:45  | 0.0  | n          | y      |
| 703 | Detmold   | 1000                    | 1.038           | 1.34      | 0.8       | 4         | 4         | 0.54      | 0:00:14  | 0.0  | y          | y      |
| 704 | Bielefeld | 1000                    | 1.037           | 1.34      | 0.8       | 4         | 4         | 0.62      | 0:00:06  | 0.0  | y          | y      |
| 705 | Gütersloh | 1000                    | 1.065           | 1.34      | 0.8       | 4         | 4         | 0.48      | 0:00:40  | 0.0  | y          | y      |
| 706 | Soest     | 1000                    | 1.038           | 1.34      | 0.8       | 4         | 4         | 0.46      | 0:00:38  | 0.11 | y          | y      |
| 707 | Dortmund  | 1000                    | 1.051           | 1.34      | 0.8       | 4         | 4         | 0.55      | 0:04:29  | 0.39 | y          | y      |
| 708 | Kassel    | 1000                    | 1.044           | 1.34      | 0.8       | 4         | 4         | 0.52      | 0:00:32  | 0.0  | y          | y      |
| 709 | Hannover  | 1000                    | 1.062           | 1.34      | 0.8       | 4         | 4         | 0.52      | 0:00:42  | 0.0  | y          | y      |
| 710 | Krefeld   | 1000                    | 1.087           | 1.34      | 0.8       | 4         | 4         | 0.46      | 0:00:14  | 0.0  | y          | y      |
| 711 | Münster   | 1000                    | 1.045           | 1.34      | 0.8       | 4         | 4         | 0.53      | 0:00:43  | 0.0  | y          | y      |
| 712 | Paderborn | 1000                    | 1.048           | 1.34      | 0.8       | 4         | 4         | 0.53      | 0:00:29  | 0.0  | y          | y      |
| 713 | Detmold   | 1000                    | 1.038           | 1.34      | 0.8       | 4         | 4         | 0.53      | 0:00:27  | 0.0  | y          | y      |

| #   | Network characteristics |           |                 |           |           |           |           |           | Solution |      | Simulation |        |
|-----|-------------------------|-----------|-----------------|-----------|-----------|-----------|-----------|-----------|----------|------|------------|--------|
|     | <i>cn</i>               | <i>bu</i> | $\frac{nl}{bu}$ | <i>lf</i> | <i>tr</i> | <i>lt</i> | <i>tt</i> | <i>as</i> | Time     | Gap  | Volt       | Ampere |
| 714 | Bielefeld               | 1000      | 1.037           | 1.34      | 0.8       | 4         | 4         | 0.48      | 0:00:41  | 0.0  | y          | y      |
| 715 | Gütersloh               | 1000      | 1.065           | 1.34      | 0.8       | 4         | 4         | 0.56      | 0:20:15  | 0.47 | y          | y      |
| 716 | Soest                   | 1000      | 1.038           | 1.34      | 0.8       | 4         | 4         | 0.54      | 0:00:29  | 0.23 | y          | y      |
| 717 | Dortmund                | 1000      | 1.051           | 1.34      | 0.8       | 4         | 4         | 0.56      | 0:00:53  | 0.0  | y          | y      |
| 718 | Kassel                  | 1000      | 1.044           | 1.34      | 0.8       | 4         | 4         | 0.57      | 0:00:26  | 0.0  | y          | y      |
| 719 | Hannover                | 1000      | 1.062           | 1.34      | 0.8       | 4         | 4         | 0.61      | 0:00:07  | 0.0  | y          | y      |
| 720 | Krefeld                 | 1000      | 1.087           | 1.34      | 0.8       | 4         | 4         | 0.53      | 0:10:55  | 0.13 | y          | y      |
| 721 | Münster                 | 1000      | 1.046           | 1.0       | 0.8       | 2         | 2         | 0.51      | 0:00:04  | 0.0  | y          | y      |
| 722 | Paderborn               | 1000      | 1.048           | 1.0       | 0.8       | 2         | 2         | 0.51      | 0:00:04  | 0.0  | y          | y      |
| 723 | Detmold                 | 1000      | 1.038           | 1.0       | 0.8       | 2         | 2         | 0.4       | 0:00:03  | 0.0  | y          | y      |
| 724 | Bielefeld               | 1000      | 1.037           | 1.0       | 0.8       | 2         | 2         | 0.56      | 0:00:04  | 0.0  | y          | y      |
| 725 | Gütersloh               | 1000      | 1.065           | 1.0       | 0.8       | 2         | 2         | 0.35      | 0:00:07  | 0.0  | y          | y      |
| 726 | Soest                   | 1000      | 1.038           | 1.0       | 0.8       | 2         | 2         | 0.47      | 0:00:05  | 0.0  | y          | y      |
| 727 | Dortmund                | 1000      | 1.051           | 1.0       | 0.8       | 2         | 2         | 0.42      | 0:00:16  | 0.0  | y          | y      |
| 728 | Kassel                  | 1000      | 1.044           | 1.0       | 0.8       | 2         | 2         | 0.38      | 0:00:05  | 0.0  | y          | y      |
| 729 | Hannover                | 1000      | 1.062           | 1.0       | 0.8       | 2         | 2         | 0.53      | 0:00:17  | 0.0  | y          | y      |
| 730 | Krefeld                 | 1000      | 1.087           | 1.0       | 0.8       | 2         | 2         | 0.38      | 0:00:07  | 0.0  | y          | y      |
| 731 | Münster                 | 1000      | 1.046           | 1.0       | 0.8       | 2         | 2         | 0.4       | 0:00:06  | 0.0  | y          | y      |
| 732 | Paderborn               | 1000      | 1.048           | 1.0       | 0.8       | 2         | 2         | 0.54      | 0:00:06  | 0.0  | y          | y      |
| 733 | Detmold                 | 1000      | 1.038           | 1.0       | 0.8       | 2         | 2         | 0.37      | 0:00:07  | 0.0  | y          | y      |
| 734 | Bielefeld               | 1000      | 1.037           | 1.0       | 0.8       | 2         | 2         | 0.56      | 0:00:05  | 0.0  | y          | y      |
| 735 | Gütersloh               | 1000      | 1.065           | 1.0       | 0.8       | 2         | 2         | 0.45      | 0:00:14  | 0.0  | y          | y      |
| 736 | Soest                   | 1000      | 1.038           | 1.0       | 0.8       | 2         | 2         | 0.4       | 0:00:10  | 0.0  | y          | y      |
| 737 | Dortmund                | 1000      | 1.051           | 1.0       | 0.8       | 2         | 2         | 0.51      | 0:00:05  | 0.0  | y          | y      |
| 738 | Kassel                  | 1000      | 1.044           | 1.0       | 0.8       | 2         | 2         | 0.46      | 0:00:05  | 0.0  | y          | y      |
| 739 | Hannover                | 1000      | 1.062           | 1.0       | 0.8       | 2         | 2         | 0.53      | 0:00:04  | 0.0  | y          | y      |
| 740 | Krefeld                 | 1000      | 1.087           | 1.0       | 0.8       | 2         | 2         | 0.4       | 0:00:08  | 0.0  | y          | y      |
| 741 | Münster                 | 1000      | 1.046           | 1.0       | 0.8       | 2         | 2         | 0.51      | 0:00:08  | 0.0  | y          | y      |
| 742 | Paderborn               | 1000      | 1.048           | 1.0       | 0.8       | 2         | 2         | 0.52      | 0:00:04  | 0.0  | y          | y      |
| 743 | Detmold                 | 1000      | 1.039           | 1.0       | 0.8       | 2         | 2         | 0.56      | 0:00:24  | 0.0  | y          | y      |
| 744 | Bielefeld               | 1000      | 1.037           | 1.0       | 0.8       | 2         | 2         | 0.42      | 0:00:20  | 0.0  | y          | y      |
| 745 | Gütersloh               | 1000      | 1.065           | 1.0       | 0.8       | 2         | 2         | 0.5       | 0:00:16  | 0.0  | y          | y      |
| 746 | Soest                   | 1000      | 1.038           | 1.0       | 0.8       | 2         | 2         | 0.48      | 0:00:06  | 0.0  | y          | y      |
| 747 | Dortmund                | 1000      | 1.051           | 1.0       | 0.8       | 2         | 2         | 0.5       | 0:00:07  | 0.0  | y          | y      |
| 748 | Kassel                  | 1000      | 1.044           | 1.0       | 0.8       | 2         | 2         | 0.5       | 0:00:25  | 0.0  | y          | y      |
| 749 | Hannover                | 1000      | 1.062           | 1.0       | 0.8       | 2         | 2         | 0.54      | 0:00:06  | 0.0  | y          | y      |
| 750 | Krefeld                 | 1000      | 1.087           | 1.0       | 0.8       | 2         | 2         | 0.47      | 0:00:48  | 0.0  | y          | y      |
| 751 | Münster                 | 1000      | 1.046           | 1.0       | 0.8       | 3         | 3         | 0.54      | 0:00:04  | 0.0  | y          | y      |
| 752 | Paderborn               | 1000      | 1.049           | 1.0       | 0.8       | 3         | 3         | 0.35      | 0:00:03  | 0.0  | y          | y      |
| 753 | Detmold                 | 1000      | 1.038           | 1.0       | 0.8       | 3         | 3         | 0.43      | 0:00:04  | 0.0  | y          | y      |
| 754 | Bielefeld               | 1000      | 1.037           | 1.0       | 0.8       | 3         | 3         | 0.59      | 0:00:07  | 0.0  | y          | y      |
| 755 | Gütersloh               | 1000      | 1.065           | 1.0       | 0.8       | 3         | 3         | 0.39      | 0:00:05  | 0.0  | y          | y      |
| 756 | Soest                   | 1000      | 1.038           | 1.0       | 0.8       | 3         | 3         | 0.51      | 0:00:03  | 0.0  | y          | y      |
| 757 | Dortmund                | 1000      | 1.051           | 1.0       | 0.8       | 3         | 3         | 0.46      | 0:00:26  | 0.08 | y          | y      |
| 758 | Kassel                  | 1000      | 1.044           | 1.0       | 0.8       | 3         | 3         | 0.41      | 0:00:06  | 0.0  | y          | y      |
| 759 | Hannover                | 1000      | 1.062           | 1.0       | 0.8       | 3         | 3         | 0.67      | 0:00:11  | 0.0  | y          | y      |
| 760 | Krefeld                 | 1000      | 1.087           | 1.0       | 0.8       | 3         | 3         | 0.41      | 0:00:29  | 0.0  | y          | y      |
| 761 | Münster                 | 1000      | 1.045           | 1.0       | 0.8       | 3         | 3         | 0.5       | 0:00:07  | 0.0  | y          | y      |
| 762 | Paderborn               | 1000      | 1.048           | 1.0       | 0.8       | 3         | 3         | 0.58      | 0:00:13  | 0.0  | y          | y      |
| 763 | Detmold                 | 1000      | 1.038           | 1.0       | 0.8       | 3         | 3         | 0.41      | 0:00:08  | 0.0  | y          | y      |
| 764 | Bielefeld               | 1000      | 1.037           | 1.0       | 0.8       | 3         | 3         | 0.59      | 0:00:06  | 0.0  | y          | y      |
| 765 | Gütersloh               | 1000      | 1.065           | 1.0       | 0.8       | 3         | 3         | 0.48      | 0:00:11  | 0.0  | y          | y      |

| #   | Network characteristics |           |                 |           |           |           |           |           | Solution |      | Simulation |        |
|-----|-------------------------|-----------|-----------------|-----------|-----------|-----------|-----------|-----------|----------|------|------------|--------|
|     | <i>cn</i>               | <i>bu</i> | $\frac{nl}{bu}$ | <i>lf</i> | <i>tr</i> | <i>lt</i> | <i>tt</i> | <i>as</i> | Time     | Gap  | Volt       | Ampere |
| 766 | Soest                   | 1000      | 1.038           | 1.0       | 0.8       | 3         | 3         | 0.43      | 0:00:20  | 0.04 | y          | y      |
| 767 | Dortmund                | 1000      | 1.051           | 1.0       | 0.8       | 3         | 3         | 0.54      | 0:00:06  | 0.0  | y          | y      |
| 768 | Kassel                  | 1000      | 1.044           | 1.0       | 0.8       | 3         | 3         | 0.5       | 0:00:09  | 0.0  | y          | y      |
| 769 | Hannover                | 1000      | 1.062           | 1.0       | 0.8       | 3         | 3         | 0.56      | 0:00:11  | 0.0  | y          | y      |
| 770 | Krefeld                 | 1000      | 1.087           | 1.0       | 0.8       | 3         | 3         | 0.44      | 0:00:10  | 0.0  | y          | y      |
| 771 | Münster                 | 1000      | 1.046           | 1.0       | 0.8       | 3         | 3         | 0.54      | 0:00:10  | 0.0  | y          | y      |
| 772 | Paderborn               | 1000      | 1.048           | 1.0       | 0.8       | 3         | 3         | 0.56      | 0:00:10  | 0.0  | y          | y      |
| 773 | Detmold                 | 1000      | 1.039           | 1.0       | 0.8       | 3         | 3         | 0.49      | 0:00:44  | 0.0  | y          | y      |
| 774 | Bielefeld               | 1000      | 1.036           | 1.0       | 0.8       | 3         | 3         | 0.53      | 0:00:33  | 0.0  | y          | y      |
| 775 | Gütersloh               | 1000      | 1.065           | 1.0       | 0.8       | 3         | 3         | 0.53      | 0:08:44  | 0.0  | y          | y      |
| 776 | Soest                   | 1000      | 1.037           | 1.0       | 0.8       | 3         | 3         | 0.53      | 0:00:07  | 0.0  | y          | y      |
| 777 | Dortmund                | 1000      | 1.051           | 1.0       | 0.8       | 3         | 3         | 0.54      | 0:00:31  | 0.0  | y          | y      |
| 778 | Kassel                  | 1000      | 1.044           | 1.0       | 0.8       | 3         | 3         | 0.54      | 0:00:23  | 0.35 | y          | y      |
| 779 | Hannover                | 1000      | 1.062           | 1.0       | 0.8       | 3         | 3         | 0.58      | 0:00:15  | 0.0  | y          | y      |
| 780 | Krefeld                 | 1000      | 1.087           | 1.0       | 0.8       | 3         | 3         | 0.5       | 0:00:55  | 0.0  | y          | y      |
| 781 | Münster                 | 1000      | 1.045           | 1.0       | 0.8       | 4         | 4         | 0.5       | 0:00:05  | 0.0  | y          | y      |
| 782 | Paderborn               | 1000      | 1.048           | 1.0       | 0.8       | 4         | 4         | 0.55      | 0:00:03  | 0.0  | y          | y      |
| 783 | Detmold                 | 1000      | 1.038           | 1.0       | 0.8       | 4         | 4         | 0.46      | 0:00:12  | 0.0  | y          | y      |
| 784 | Bielefeld               | 1000      | 1.037           | 1.0       | 0.8       | 4         | 4         | 0.6       | 0:00:06  | 0.0  | y          | y      |
| 785 | Gütersloh               | 1000      | 1.066           | 1.0       | 0.8       | 4         | 4         | 0.43      | 0:00:09  | 0.0  | y          | y      |
| 786 | Soest                   | 1000      | 1.038           | 1.0       | 0.8       | 4         | 4         | 0.53      | 0:00:05  | 0.0  | y          | y      |
| 787 | Dortmund                | 1000      | 1.051           | 1.0       | 0.8       | 4         | 4         | 0.48      | 0:00:28  | 0.08 | y          | y      |
| 788 | Kassel                  | 1000      | 1.044           | 1.0       | 0.8       | 4         | 4         | 0.44      | 0:00:05  | 0.0  | y          | y      |
| 789 | Hannover                | 1000      | 1.062           | 1.0       | 0.8       | 4         | 4         | 0.67      | 0:00:05  | 0.0  | y          | y      |
| 790 | Krefeld                 | 1000      | 1.087           | 1.0       | 0.8       | 4         | 4         | 0.57      | 0:00:11  | 0.0  | y          | y      |
| 791 | Münster                 | 1000      | 1.046           | 1.0       | 0.8       | 4         | 4         | 0.47      | 0:00:11  | 0.0  | y          | y      |
| 792 | Paderborn               | 1000      | 1.048           | 1.0       | 0.8       | 4         | 4         | 0.61      | 0:00:09  | 0.0  | y          | y      |
| 793 | Detmold                 | 1000      | 1.038           | 1.0       | 0.8       | 4         | 4         | 0.54      | 0:00:11  | 0.0  | y          | y      |
| 794 | Bielefeld               | 1000      | 1.036           | 1.0       | 0.8       | 4         | 4         | 0.56      | 0:00:05  | 0.0  | y          | y      |
| 795 | Gütersloh               | 1000      | 1.065           | 1.0       | 0.8       | 4         | 4         | 0.51      | 0:00:07  | 0.0  | y          | y      |
| 796 | Soest                   | 1000      | 1.038           | 1.0       | 0.8       | 4         | 4         | 0.46      | 0:00:17  | 0.0  | y          | y      |
| 797 | Dortmund                | 1000      | 1.051           | 1.0       | 0.8       | 4         | 4         | 0.55      | 0:00:47  | 0.1  | y          | y      |
| 798 | Kassel                  | 1000      | 1.044           | 1.0       | 0.8       | 4         | 4         | 0.52      | 0:00:09  | 0.0  | y          | y      |
| 799 | Hannover                | 1000      | 1.062           | 1.0       | 0.8       | 4         | 4         | 0.58      | 0:00:06  | 0.0  | y          | y      |
| 800 | Krefeld                 | 1000      | 1.087           | 1.0       | 0.8       | 4         | 4         | 0.54      | 0:00:40  | 0.0  | y          | y      |
| 801 | Münster                 | 1000      | 1.046           | 1.0       | 0.8       | 4         | 4         | 0.57      | 0:00:07  | 0.0  | y          | y      |
| 802 | Paderborn               | 1000      | 1.048           | 1.0       | 0.8       | 4         | 4         | 0.53      | 0:00:07  | 0.0  | y          | y      |
| 803 | Detmold                 | 1000      | 1.039           | 1.0       | 0.8       | 4         | 4         | 0.6       | 0:00:26  | 0.0  | y          | y      |
| 804 | Bielefeld               | 1000      | 1.037           | 1.0       | 0.8       | 4         | 4         | 0.48      | 0:00:32  | 0.0  | y          | y      |
| 805 | Gütersloh               | 1000      | 1.065           | 1.0       | 0.8       | 4         | 4         | 0.56      | 0:05:06  | 0.0  | y          | y      |
| 806 | Soest                   | 1000      | 1.038           | 1.0       | 0.8       | 4         | 4         | 0.54      | 0:00:15  | 0.0  | y          | y      |
| 807 | Dortmund                | 1000      | 1.051           | 1.0       | 0.8       | 4         | 4         | 0.56      | 0:00:15  | 0.0  | y          | y      |
| 808 | Kassel                  | 1000      | 1.044           | 1.0       | 0.8       | 4         | 4         | 0.57      | 0:00:36  | 0.33 | y          | y      |
| 809 | Hannover                | 1000      | 1.062           | 1.0       | 0.8       | 4         | 4         | 0.61      | 0:00:10  | 0.0  | y          | y      |
| 810 | Krefeld                 | 1000      | 1.087           | 1.0       | 0.8       | 4         | 4         | 0.54      | 0:01:02  | 0.0  | y          | y      |
| 811 | Münster                 | 2000      | 1.063           | 0.83      | 0.75      | 2         | 2         | 0.41      | 0:00:41  | 0.0  | y          | y      |
| 812 | Paderborn               | 2000      | 1.047           | 0.83      | 0.75      | 2         | 2         | 0.52      | 0:00:37  | 0.0  | y          | y      |
| 813 | Detmold                 | 2000      | 1.056           | 0.83      | 0.75      | 2         | 2         | 0.31      | 0:04:46  | 0.0  | y          | y      |
| 814 | Bielefeld               | 2000      | 1.044           | 0.83      | 0.75      | 2         | 2         | 0.38      | 0:00:28  | 0.0  | y          | y      |
| 815 | Gütersloh               | 2000      | 1.056           | 0.83      | 0.75      | 2         | 2         | 0.3       | 0:05:42  | 0.0  | y          | y      |
| 816 | Soest                   | 2000      | 1.046           | 0.83      | 0.75      | 2         | 2         | 0.36      | 0:01:06  | 0.0  | y          | y      |
| 817 | Dortmund                | 2000      | 1.066           | 0.83      | 0.75      | 2         | 2         | 0.52      | 0:00:35  | 0.0  | y          | y      |

| #   | Network characteristics |           |                 |           |           |           |           |           | Solution |      | Simulation |        |
|-----|-------------------------|-----------|-----------------|-----------|-----------|-----------|-----------|-----------|----------|------|------------|--------|
|     | <i>cn</i>               | <i>bu</i> | $\frac{nl}{bu}$ | <i>lf</i> | <i>tr</i> | <i>lt</i> | <i>tt</i> | <i>as</i> | Time     | Gap  | Volt       | Ampere |
| 818 | Kassel                  | 2000      | 1.058           | 0.83      | 0.75      | 2         | 2         | 0.3       | 0:00:32  | 0.0  | y          | y      |
| 819 | Hannover                | 2000      | 1.103           | 0.83      | 0.75      | 2         | 2         | 0.3       | 0:00:47  | 0.0  | y          | y      |
| 820 | Krefeld                 | 2000      | 1.079           | 0.83      | 0.75      | 2         | 2         | 0.31      | 0:03:48  | 0.0  | y          | y      |
| 821 | Münster                 | 2000      | 1.063           | 0.83      | 0.75      | 2         | 2         | 0.43      | 0:00:50  | 0.0  | y          | y      |
| 822 | Paderborn               | 2000      | 1.047           | 0.83      | 0.75      | 2         | 2         | 0.48      | 0:00:58  | 0.0  | y          | y      |
| 823 | Detmold                 | 2000      | 1.056           | 0.83      | 0.75      | 2         | 2         | 0.34      | 0:10:34  | 0.0  | y          | y      |
| 824 | Bielefeld               | 2000      | 1.044           | 0.83      | 0.75      | 2         | 2         | 0.43      | 0:01:21  | 0.0  | y          | y      |
| 825 | Gütersloh               | 2000      | 1.056           | 0.83      | 0.75      | 2         | 2         | 0.34      | 0:26:56  | 0.0  | y          | y      |
| 826 | Soest                   | 2000      | 1.046           | 0.83      | 0.75      | 2         | 2         | 0.37      | 0:00:33  | 0.0  | y          | y      |
| 827 | Dortmund                | 2000      | 1.066           | 0.83      | 0.75      | 2         | 2         | 0.45      | 0:00:49  | 0.0  | y          | y      |
| 828 | Kassel                  | 2000      | 1.058           | 0.83      | 0.75      | 2         | 2         | 0.35      | 0:03:47  | 0.0  | y          | y      |
| 829 | Hannover                | 2000      | 1.103           | 0.83      | 0.75      | 2         | 2         | 0.34      | 0:04:40  | 0.0  | y          | y      |
| 830 | Krefeld                 | 2000      | 1.079           | 0.83      | 0.75      | 2         | 2         | 0.34      | 0:04:35  | 0.0  | y          | y      |
| 831 | Münster                 | 2000      | 1.063           | 0.83      | 0.75      | 2         | 2         | 0.44      | 0:01:03  | 0.0  | y          | y      |
| 832 | Paderborn               | 2000      | 1.047           | 0.83      | 0.75      | 2         | 2         | 0.44      | 0:06:40  | 0.0  | y          | y      |
| 833 | Detmold                 | 2000      | 1.056           | 0.83      | 0.75      | 2         | 2         | 0.41      | 0:04:41  | 0.0  | y          | y      |
| 834 | Bielefeld               | 2000      | 1.044           | 0.83      | 0.75      | 2         | 2         | 0.47      | 0:12:28  | 0.13 | y          | y      |
| 835 | Gütersloh               | 2000      | 1.056           | 0.83      | 0.75      | 2         | 2         | 0.43      | 8:44:19  | 0.12 | y          | y      |
| 836 | Soest                   | 2000      | 1.046           | 0.83      | 0.75      | 2         | 2         | 0.43      | 0:00:58  | 0.0  | y          | y      |
| 837 | Dortmund                | 2000      | 1.065           | 0.83      | 0.75      | 2         | 2         | 0.44      | 0:22:11  | 0.0  | y          | y      |
| 838 | Kassel                  | 2000      | 1.058           | 0.83      | 0.75      | 2         | 2         | 0.43      | 0:02:35  | 0.0  | y          | y      |
| 839 | Hannover                | 2000      | 1.103           | 0.83      | 0.75      | 2         | 2         | 0.42      | 0:22:35  | 0.0  | y          | y      |
| 840 | Krefeld                 | 2000      | 1.079           | 0.83      | 0.75      | 2         | 2         | 0.44      | 0:03:24  | 0.0  | y          | y      |
| 841 | Münster                 | 2000      | 1.063           | 0.83      | 0.75      | 3         | 3         | 0.45      | 0:01:20  | 0.0  | y          | y      |
| 842 | Paderborn               | 2000      | 1.047           | 0.83      | 0.75      | 3         | 3         | 0.54      | 0:05:14  | 0.0  | y          | y      |
| 843 | Detmold                 | 2000      | 1.056           | 0.83      | 0.75      | 3         | 3         | 0.34      | 0:02:14  | 0.0  | y          | y      |
| 844 | Bielefeld               | 2000      | 1.044           | 0.83      | 0.75      | 3         | 3         | 0.42      | 0:00:32  | 0.0  | y          | y      |
| 845 | Gütersloh               | 2000      | 1.056           | 0.83      | 0.75      | 3         | 3         | 0.34      | 0:07:10  | 0.0  | y          | y      |
| 846 | Soest                   | 2000      | 1.046           | 0.83      | 0.75      | 3         | 3         | 0.35      | 0:00:25  | 0.0  | y          | y      |
| 847 | Dortmund                | 2000      | 1.065           | 0.83      | 0.75      | 3         | 3         | 0.32      | 0:01:06  | 0.0  | y          | y      |
| 848 | Kassel                  | 2000      | 1.058           | 0.83      | 0.75      | 3         | 3         | 0.37      | 0:01:19  | 0.0  | y          | y      |
| 849 | Hannover                | 2000      | 1.103           | 0.83      | 0.75      | 3         | 3         | 0.33      | 0:03:54  | 0.0  | y          | y      |
| 850 | Krefeld                 | 2000      | 1.081           | 0.83      | 0.75      | 3         | 3         | 0.38      | 0:06:44  | 0.0  | y          | y      |
| 851 | Münster                 | 2000      | 1.063           | 0.83      | 0.75      | 3         | 3         | 0.46      | 0:01:33  | 0.0  | y          | y      |
| 852 | Paderborn               | 2000      | 1.047           | 0.83      | 0.75      | 3         | 3         | 0.52      | 0:07:49  | 0.0  | y          | y      |
| 853 | Detmold                 | 2000      | 1.056           | 0.83      | 0.75      | 3         | 3         | 0.41      | 0:04:09  | 0.0  | y          | y      |
| 854 | Bielefeld               | 2000      | 1.044           | 0.83      | 0.75      | 3         | 3         | 0.47      | 0:02:46  | 0.0  | y          | y      |
| 855 | Gütersloh               | 2000      | 1.056           | 0.83      | 0.75      | 3         | 3         | 0.36      | 1:23:41  | 0.0  | y          | y      |
| 856 | Soest                   | 2000      | 1.046           | 0.83      | 0.75      | 3         | 3         | 0.41      | 0:09:03  | 0.44 | y          | y      |
| 857 | Dortmund                | 2000      | 1.065           | 0.83      | 0.75      | 3         | 3         | 0.37      | 0:02:58  | 0.0  | y          | y      |
| 858 | Kassel                  | 2000      | 1.059           | 0.83      | 0.75      | 3         | 3         | 0.39      | 0:02:06  | 0.0  | y          | y      |
| 859 | Hannover                | 2000      | 1.103           | 0.83      | 0.75      | 3         | 3         | 0.43      | 1:01:19  | 0.0  | y          | y      |
| 860 | Krefeld                 | 2000      | 1.081           | 0.83      | 0.75      | 3         | 3         | 0.41      | 0:13:38  | 0.0  | y          | y      |
| 861 | Münster                 | 2000      | 1.063           | 0.83      | 0.75      | 3         | 3         | 0.47      | 0:03:11  | 0.0  | y          | y      |
| 862 | Paderborn               | 2000      | 1.047           | 0.83      | 0.75      | 3         | 3         | 0.47      | 0:17:36  | 0.0  | n          | y      |
| 863 | Detmold                 | 2000      | 1.056           | 0.83      | 0.75      | 3         | 3         | 0.44      | 0:02:50  | 0.0  | y          | y      |
| 864 | Bielefeld               | 2000      | 1.044           | 0.83      | 0.75      | 3         | 3         | 0.5       | 0:03:38  | 0.0  | y          | y      |
| 865 | Gütersloh               | 2000      | 1.056           | 0.83      | 0.75      | 3         | 3         | 0.46      | *        | *    | *          | *      |
| 866 | Soest                   | 2000      | 1.046           | 0.83      | 0.75      | 3         | 3         | 0.43      | 0:02:47  | 0.16 | y          | y      |
| 867 | Dortmund                | 2000      | 1.065           | 0.83      | 0.75      | 3         | 3         | 0.46      | 4:17:31  | 0.0  | y          | y      |
| 868 | Kassel                  | 2000      | 1.058           | 0.83      | 0.75      | 3         | 3         | 0.46      | 0:15:13  | 0.0  | y          | y      |
| 869 | Hannover                | 2000      | 1.103           | 0.83      | 0.75      | 3         | 3         | 0.45      | 0:05:23  | 0.0  | y          | y      |

| #   | <i>cn</i> | Network characteristics |                 |           |           |           |           |           | Solution |      | Simulation |        |
|-----|-----------|-------------------------|-----------------|-----------|-----------|-----------|-----------|-----------|----------|------|------------|--------|
|     |           | <i>bu</i>               | $\frac{nl}{bu}$ | <i>lf</i> | <i>tr</i> | <i>lt</i> | <i>tt</i> | <i>as</i> | Time     | Gap  | Volt       | Ampere |
| 870 | Krefeld   | 2000                    | 1.081           | 0.83      | 0.75      | 3         | 3         | 0.48      | 1:08:03  | 0.0  | y          | y      |
| 871 | Münster   | 2000                    | 1.063           | 0.83      | 0.75      | 4         | 4         | 0.47      | 0:00:54  | 0.0  | y          | y      |
| 872 | Paderborn | 2000                    | 1.047           | 0.83      | 0.75      | 4         | 4         | 0.56      | 0:03:31  | 0.0  | y          | y      |
| 873 | Detmold   | 2000                    | 1.056           | 0.83      | 0.75      | 4         | 4         | 0.37      | 0:02:25  | 0.0  | y          | y      |
| 874 | Bielefeld | 2000                    | 1.044           | 0.83      | 0.75      | 4         | 4         | 0.45      | 0:02:29  | 0.0  | y          | y      |
| 875 | Gütersloh | 2000                    | 1.056           | 0.83      | 0.75      | 4         | 4         | 0.36      | 0:19:11  | 0.0  | y          | y      |
| 876 | Soest     | 2000                    | 1.046           | 0.83      | 0.75      | 4         | 4         | 0.39      | 0:00:42  | 0.0  | y          | y      |
| 877 | Dortmund  | 2000                    | 1.066           | 0.83      | 0.75      | 4         | 4         | 0.56      | 0:00:39  | 0.0  | y          | y      |
| 878 | Kassel    | 2000                    | 1.058           | 0.83      | 0.75      | 4         | 4         | 0.36      | 0:00:40  | 0.0  | y          | y      |
| 879 | Hannover  | 2000                    | 1.103           | 0.83      | 0.75      | 4         | 4         | 0.38      | 0:05:37  | 0.0  | y          | y      |
| 880 | Krefeld   | 2000                    | 1.081           | 0.83      | 0.75      | 4         | 4         | 0.41      | 0:01:31  | 0.0  | y          | y      |
| 881 | Münster   | 2000                    | 1.062           | 0.83      | 0.75      | 4         | 4         | 0.49      | 0:03:23  | 0.0  | y          | y      |
| 882 | Paderborn | 2000                    | 1.047           | 0.83      | 0.75      | 4         | 4         | 0.54      | 0:01:13  | 0.0  | y          | y      |
| 883 | Detmold   | 2000                    | 1.056           | 0.83      | 0.75      | 4         | 4         | 0.4       | 0:17:26  | 0.0  | y          | y      |
| 884 | Bielefeld | 2000                    | 1.044           | 0.83      | 0.75      | 4         | 4         | 0.5       | 0:17:10  | 0.0  | y          | y      |
| 885 | Gütersloh | 2000                    | 1.056           | 0.83      | 0.75      | 4         | 4         | 0.38      | 4:02:48  | 0.0  | y          | y      |
| 886 | Soest     | 2000                    | 1.046           | 0.83      | 0.75      | 4         | 4         | 0.44      | 0:13:14  | 0.0  | y          | y      |
| 887 | Dortmund  | 2000                    | 1.066           | 0.83      | 0.75      | 4         | 4         | 0.52      | 0:06:03  | 0.0  | y          | y      |
| 888 | Kassel    | 2000                    | 1.058           | 0.83      | 0.75      | 4         | 4         | 0.4       | 0:01:23  | 0.0  | y          | y      |
| 889 | Hannover  | 2000                    | 1.103           | 0.83      | 0.75      | 4         | 4         | 0.46      | 3:06:06  | 0.21 | y          | y      |
| 890 | Krefeld   | 2000                    | 1.081           | 0.83      | 0.75      | 4         | 4         | 0.43      | 0:01:57  | 0.0  | y          | y      |
| 891 | Münster   | 2000                    | 1.062           | 0.83      | 0.75      | 4         | 4         | 0.49      | 0:01:17  | 0.0  | y          | y      |
| 892 | Paderborn | 2000                    | 1.048           | 0.83      | 0.75      | 4         | 4         | 0.45      | 0:22:30  | 0.47 | y          | y      |
| 893 | Detmold   | 2000                    | 1.056           | 0.83      | 0.75      | 4         | 4         | 0.46      | 0:02:02  | 0.0  | y          | y      |
| 894 | Bielefeld | 2000                    | 1.044           | 0.83      | 0.75      | 4         | 4         | 0.53      | 1:10:53  | 0.0  | y          | y      |
| 895 | Gütersloh | 2000                    | 1.056           | 0.83      | 0.75      | 4         | 4         | 0.48      | *        | *    | *          | *      |
| 896 | Soest     | 2000                    | 1.046           | 0.83      | 0.75      | 4         | 4         | 0.5       | 0:02:41  | 0.0  | y          | y      |
| 897 | Dortmund  | 2000                    | 1.066           | 0.83      | 0.75      | 4         | 4         | 0.56      | 1:52:38  | 0.0  | y          | y      |
| 898 | Kassel    | 2000                    | 1.058           | 0.83      | 0.75      | 4         | 4         | 0.48      | 0:04:23  | 0.0  | y          | y      |
| 899 | Hannover  | 2000                    | 1.103           | 0.83      | 0.75      | 4         | 4         | 0.47      | 2:07:21  | 0.0  | y          | y      |
| 900 | Krefeld   | 2000                    | 1.079           | 0.83      | 0.75      | 4         | 4         | 0.49      | 0:02:38  | 0.0  | y          | y      |
| 901 | Münster   | 2000                    | 1.063           | 1.34      | 0.75      | 2         | 2         | 0.41      | 0:01:09  | 0.0  | y          | y      |
| 902 | Paderborn | 2000                    | 1.047           | 1.34      | 0.75      | 2         | 2         | 0.52      | 0:00:38  | 0.0  | y          | y      |
| 903 | Detmold   | 2000                    | 1.056           | 1.34      | 0.75      | 2         | 2         | 0.31      | 0:06:10  | 0.0  | y          | y      |
| 904 | Bielefeld | 2000                    | 1.044           | 1.34      | 0.75      | 2         | 2         | 0.38      | 0:00:43  | 0.0  | y          | y      |
| 905 | Gütersloh | 2000                    | 1.057           | 1.34      | 0.75      | 2         | 2         | 0.32      | 0:00:33  | 0.0  | y          | y      |
| 906 | Soest     | 2000                    | 1.046           | 1.34      | 0.75      | 2         | 2         | 0.33      | 0:01:13  | 0.0  | y          | y      |
| 907 | Dortmund  | 2000                    | 1.066           | 1.34      | 0.75      | 2         | 2         | 0.52      | 0:00:43  | 0.0  | y          | y      |
| 908 | Kassel    | 2000                    | 1.058           | 1.34      | 0.75      | 2         | 2         | 0.3       | 0:00:54  | 0.0  | y          | y      |
| 909 | Hannover  | 2000                    | 1.103           | 1.34      | 0.75      | 2         | 2         | 0.44      | 0:02:16  | 0.0  | y          | y      |
| 910 | Krefeld   | 2000                    | 1.079           | 1.34      | 0.75      | 2         | 2         | 0.31      | 0:03:41  | 0.0  | y          | y      |
| 911 | Münster   | 2000                    | 1.063           | 1.34      | 0.75      | 2         | 2         | 0.43      | 0:03:07  | 0.0  | y          | y      |
| 912 | Paderborn | 2000                    | 1.047           | 1.34      | 0.75      | 2         | 2         | 0.48      | 0:03:07  | 0.0  | y          | y      |
| 913 | Detmold   | 2000                    | 1.056           | 1.34      | 0.75      | 2         | 2         | 0.34      | 1:14:30  | 0.23 | y          | y      |
| 914 | Bielefeld | 2000                    | 1.042           | 1.34      | 0.75      | 2         | 2         | 0.48      | 0:00:42  | 0.0  | y          | y      |
| 915 | Gütersloh | 2000                    | 1.056           | 1.34      | 0.75      | 2         | 2         | 0.34      | 1:22:55  | 0.0  | y          | y      |
| 916 | Soest     | 2000                    | 1.046           | 1.34      | 0.75      | 2         | 2         | 0.34      | 0:00:45  | 0.0  | y          | y      |
| 917 | Dortmund  | 2000                    | 1.066           | 1.34      | 0.75      | 2         | 2         | 0.45      | 0:01:01  | 0.0  | y          | y      |
| 918 | Kassel    | 2000                    | 1.058           | 1.34      | 0.75      | 2         | 2         | 0.37      | 0:00:55  | 0.22 | y          | y      |
| 919 | Hannover  | 2000                    | 1.103           | 1.34      | 0.75      | 2         | 2         | 0.4       | 41:41:04 | 0.0  | y          | y      |
| 920 | Krefeld   | 2000                    | 1.079           | 1.34      | 0.75      | 2         | 2         | 0.34      | 0:01:18  | 0.0  | y          | y      |
| 921 | Münster   | 2000                    | 1.062           | 1.34      | 0.75      | 2         | 2         | 0.44      | 0:02:38  | 0.0  | y          | y      |

| #   | Network characteristics |           |                 |           |           |           |           |           | Solution |      | Simulation |        |
|-----|-------------------------|-----------|-----------------|-----------|-----------|-----------|-----------|-----------|----------|------|------------|--------|
|     | <i>cn</i>               | <i>bu</i> | $\frac{nl}{bu}$ | <i>lf</i> | <i>tr</i> | <i>lt</i> | <i>tt</i> | <i>as</i> | Time     | Gap  | Volt       | Ampere |
| 922 | Paderborn               | 2000      | 1.048           | 1.34      | 0.75      | 2         | 2         | 0.41      | 1:15:27  | 0.32 | n          | y      |
| 923 | Detmold                 | 2000      | 1.056           | 1.34      | 0.75      | 2         | 2         | 0.45      | 0:02:57  | 0.0  | y          | y      |
| 924 | Bielefeld               | 2000      | 1.044           | 1.34      | 0.75      | 2         | 2         | 0.47      | 0:17:07  | 0.0  | y          | y      |
| 925 | Gütersloh               | 2000      | 1.057           | 1.34      | 0.75      | 2         | 2         | 0.42      | 5:22:00  | 0.0  | y          | y      |
| 926 | Soest                   | 2000      | 1.046           | 1.34      | 0.75      | 2         | 2         | 0.45      | 0:08:04  | 0.41 | y          | y      |
| 927 | Dortmund                | 2000      | 1.065           | 1.34      | 0.75      | 2         | 2         | 0.44      | *        | *    | *          | *      |
| 928 | Kassel                  | 2000      | 1.058           | 1.34      | 0.75      | 2         | 2         | 0.43      | 0:11:09  | 0.16 | y          | y      |
| 929 | Hannover                | 2000      | 1.103           | 1.34      | 0.75      | 2         | 2         | 0.43      | 0:03:06  | 0.15 | y          | y      |
| 930 | Krefeld                 | 2000      | 1.081           | 1.34      | 0.75      | 2         | 2         | 0.43      | 0:05:58  | 0.0  | y          | y      |
| 931 | Münster                 | 2000      | 1.062           | 1.34      | 0.75      | 3         | 3         | 0.35      | 0:02:37  | 0.0  | y          | y      |
| 932 | Paderborn               | 2000      | 1.047           | 1.34      | 0.75      | 3         | 3         | 0.54      | 0:01:52  | 0.0  | y          | y      |
| 933 | Detmold                 | 2000      | 1.056           | 1.34      | 0.75      | 3         | 3         | 0.33      | 0:02:26  | 0.0  | y          | y      |
| 934 | Bielefeld               | 2000      | 1.042           | 1.34      | 0.75      | 3         | 3         | 0.44      | 0:01:28  | 0.0  | y          | y      |
| 935 | Gütersloh               | 2000      | 1.057           | 1.34      | 0.75      | 3         | 3         | 0.36      | 0:01:43  | 0.0  | y          | y      |
| 936 | Soest                   | 2000      | 1.046           | 1.34      | 0.75      | 3         | 3         | 0.36      | 0:07:45  | 0.0  | y          | y      |
| 937 | Dortmund                | 2000      | 1.066           | 1.34      | 0.75      | 3         | 3         | 0.54      | 0:02:09  | 0.0  | y          | y      |
| 938 | Kassel                  | 2000      | 1.058           | 1.34      | 0.75      | 3         | 3         | 0.37      | 0:00:49  | 0.0  | y          | y      |
| 939 | Hannover                | 2000      | 1.103           | 1.34      | 0.75      | 3         | 3         | 0.33      | 0:02:37  | 0.0  | y          | y      |
| 940 | Krefeld                 | 2000      | 1.081           | 1.34      | 0.75      | 3         | 3         | 0.41      | 0:07:10  | 0.0  | y          | y      |
| 941 | Münster                 | 2000      | 1.063           | 1.34      | 0.75      | 3         | 3         | 0.46      | 0:01:39  | 0.0  | y          | y      |
| 942 | Paderborn               | 2000      | 1.047           | 1.34      | 0.75      | 3         | 3         | 0.52      | 0:01:17  | 0.0  | y          | y      |
| 943 | Detmold                 | 2000      | 1.056           | 1.34      | 0.75      | 3         | 3         | 0.38      | 0:09:19  | 0.21 | y          | y      |
| 944 | Bielefeld               | 2000      | 1.044           | 1.34      | 0.75      | 3         | 3         | 0.47      | 0:12:02  | 0.0  | y          | y      |
| 945 | Gütersloh               | 2000      | 1.057           | 1.34      | 0.75      | 3         | 3         | 0.37      | 0:11:42  | 0.0  | y          | y      |
| 946 | Soest                   | 2000      | 1.046           | 1.34      | 0.75      | 3         | 3         | 0.4       | 0:16:14  | 0.08 | y          | y      |
| 947 | Dortmund                | 2000      | 1.066           | 1.34      | 0.75      | 3         | 3         | 0.49      | 0:03:02  | 0.0  | y          | y      |
| 948 | Kassel                  | 2000      | 1.058           | 1.34      | 0.75      | 3         | 3         | 0.38      | 0:01:19  | 0.0  | y          | y      |
| 949 | Hannover                | 2000      | 1.103           | 1.34      | 0.75      | 3         | 3         | 0.43      | *        | *    | *          | *      |
| 950 | Krefeld                 | 2000      | 1.079           | 1.34      | 0.75      | 3         | 3         | 0.36      | 0:05:02  | 0.0  | y          | y      |
| 951 | Münster                 | 2000      | 1.062           | 1.34      | 0.75      | 3         | 3         | 0.46      | 0:03:43  | 0.0  | y          | y      |
| 952 | Paderborn               | 2000      | 1.047           | 1.34      | 0.75      | 3         | 3         | 0.47      | 0:24:56  | 0.22 | n          | y      |
| 953 | Detmold                 | 2000      | 1.056           | 1.34      | 0.75      | 3         | 3         | 0.44      | 48:00:00 | 1.5  | y          | y      |
| 954 | Bielefeld               | 2000      | 1.044           | 1.34      | 0.75      | 3         | 3         | 0.5       | 11:09:45 | 0.0  | y          | y      |
| 955 | Gütersloh               | 2000      | 1.057           | 1.34      | 0.75      | 3         | 3         | 0.45      | 2:59:23  | 0.2  | y          | y      |
| 956 | Soest                   | 2000      | 1.046           | 1.34      | 0.75      | 3         | 3         | 0.43      | 2:04:52  | 0.44 | y          | y      |
| 957 | Dortmund                | 2000      | 1.066           | 1.34      | 0.75      | 3         | 3         | 0.53      | *        | *    | *          | *      |
| 958 | Kassel                  | 2000      | 1.058           | 1.34      | 0.75      | 3         | 3         | 0.46      | 0:25:19  | 0.0  | y          | y      |
| 959 | Hannover                | 2000      | 1.103           | 1.34      | 0.75      | 3         | 3         | 0.45      | 0:06:09  | 0.0  | y          | y      |
| 960 | Krefeld                 | 2000      | 1.079           | 1.34      | 0.75      | 3         | 3         | 0.47      | 2:58:55  | 0.46 | y          | y      |
| 961 | Münster                 | 2000      | 1.063           | 1.34      | 0.75      | 4         | 4         | 0.47      | 0:02:18  | 0.0  | y          | y      |
| 962 | Paderborn               | 2000      | 1.047           | 1.34      | 0.75      | 4         | 4         | 0.48      | 0:00:59  | 0.0  | y          | y      |
| 963 | Detmold                 | 2000      | 1.056           | 1.34      | 0.75      | 4         | 4         | 0.41      | 0:07:13  | 0.44 | y          | y      |
| 964 | Bielefeld               | 2000      | 1.044           | 1.34      | 0.75      | 4         | 4         | 0.45      | 0:02:27  | 0.0  | y          | y      |
| 965 | Gütersloh               | 2000      | 1.057           | 1.34      | 0.75      | 4         | 4         | 0.39      | 0:00:33  | 0.0  | y          | y      |
| 966 | Soest                   | 2000      | 1.046           | 1.34      | 0.75      | 4         | 4         | 0.38      | 0:06:30  | 0.0  | y          | y      |
| 967 | Dortmund                | 2000      | 1.065           | 1.34      | 0.75      | 4         | 4         | 0.39      | 0:06:36  | 0.0  | y          | y      |
| 968 | Kassel                  | 2000      | 1.058           | 1.34      | 0.75      | 4         | 4         | 0.4       | 0:00:44  | 0.0  | y          | y      |
| 969 | Hannover                | 2000      | 1.103           | 1.34      | 0.75      | 4         | 4         | 0.36      | 0:09:01  | 0.0  | y          | y      |
| 970 | Krefeld                 | 2000      | 1.081           | 1.34      | 0.75      | 4         | 4         | 0.41      | 0:02:30  | 0.0  | y          | y      |
| 971 | Münster                 | 2000      | 1.063           | 1.34      | 0.75      | 4         | 4         | 0.49      | 0:01:43  | 0.0  | y          | y      |
| 972 | Paderborn               | 2000      | 1.047           | 1.34      | 0.75      | 4         | 4         | 0.54      | 0:01:14  | 0.0  | y          | y      |
| 973 | Detmold                 | 2000      | 1.056           | 1.34      | 0.75      | 4         | 4         | 0.4       | 2:16:38  | 0.25 | y          | y      |

| #    | <i>cn</i> | Network characteristics |                 |           |           |           |           |           | Solution |      | Simulation |        |
|------|-----------|-------------------------|-----------------|-----------|-----------|-----------|-----------|-----------|----------|------|------------|--------|
|      |           | <i>bu</i>               | $\frac{nl}{bu}$ | <i>lf</i> | <i>tr</i> | <i>lt</i> | <i>tt</i> | <i>as</i> | Time     | Gap  | Volt       | Ampere |
| 974  | Bielefeld | 2000                    | 1.044           | 1.34      | 0.75      | 4         | 4         | 0.5       | 0:04:09  | 0.0  | y          | y      |
| 975  | Gütersloh | 2000                    | 1.056           | 1.34      | 0.75      | 4         | 4         | 0.38      | 3:19:16  | 0.0  | y          | y      |
| 976  | Soest     | 2000                    | 1.046           | 1.34      | 0.75      | 4         | 4         | 0.44      | 0:48:28  | 0.0  | y          | y      |
| 977  | Dortmund  | 2000                    | 1.066           | 1.34      | 0.75      | 4         | 4         | 0.52      | 0:03:15  | 0.0  | y          | y      |
| 978  | Kassel    | 2000                    | 1.058           | 1.34      | 0.75      | 4         | 4         | 0.4       | 0:05:46  | 0.0  | y          | y      |
| 979  | Hannover  | 2000                    | 1.103           | 1.34      | 0.75      | 4         | 4         | 0.46      | *        | *    | *          | *      |
| 980  | Krefeld   | 2000                    | 1.081           | 1.34      | 0.75      | 4         | 4         | 0.43      | 0:06:52  | 0.0  | y          | y      |
| 981  | Münster   | 2000                    | 1.063           | 1.34      | 0.75      | 4         | 4         | 0.49      | 0:04:38  | 0.14 | y          | y      |
| 982  | Paderborn | 2000                    | 1.047           | 1.34      | 0.75      | 4         | 4         | 0.49      | 0:24:05  | 0.22 | n          | y      |
| 983  | Detmold   | 2000                    | 1.056           | 1.34      | 0.75      | 4         | 4         | 0.46      | 2:21:54  | 0.21 | y          | y      |
| 984  | Bielefeld | 2000                    | 1.044           | 1.34      | 0.75      | 4         | 4         | 0.53      | 9:07:54  | 0.0  | y          | y      |
| 985  | Gütersloh | 2000                    | 1.056           | 1.34      | 0.75      | 4         | 4         | 0.48      | *        | *    | *          | *      |
| 986  | Soest     | 2000                    | 1.046           | 1.34      | 0.75      | 4         | 4         | 0.48      | 0:14:33  | 0.0  | y          | y      |
| 987  | Dortmund  | 2000                    | 1.065           | 1.34      | 0.75      | 4         | 4         | 0.48      | *        | *    | *          | *      |
| 988  | Kassel    | 2000                    | 1.058           | 1.34      | 0.75      | 4         | 4         | 0.49      | 0:13:50  | 0.0  | y          | y      |
| 989  | Hannover  | 2000                    | 1.103           | 1.34      | 0.75      | 4         | 4         | 0.48      | 0:59:40  | 0.0  | y          | y      |
| 990  | Krefeld   | 2000                    | 1.079           | 1.34      | 0.75      | 4         | 4         | 0.49      | 1:55:52  | 0.0  | y          | y      |
| 991  | Münster   | 2000                    | 1.063           | 1.0       | 0.75      | 2         | 2         | 0.41      | 0:01:28  | 0.0  | y          | y      |
| 992  | Paderborn | 2000                    | 1.047           | 1.0       | 0.75      | 2         | 2         | 0.52      | 0:00:44  | 0.0  | y          | y      |
| 993  | Detmold   | 2000                    | 1.056           | 1.0       | 0.75      | 2         | 2         | 0.31      | 0:01:27  | 0.0  | y          | y      |
| 994  | Bielefeld | 2000                    | 1.042           | 1.0       | 0.75      | 2         | 2         | 0.4       | 0:00:29  | 0.0  | y          | y      |
| 995  | Gütersloh | 2000                    | 1.057           | 1.0       | 0.75      | 2         | 2         | 0.32      | 0:00:37  | 0.0  | y          | y      |
| 996  | Soest     | 2000                    | 1.046           | 1.0       | 0.75      | 2         | 2         | 0.31      | 0:00:30  | 0.0  | y          | y      |
| 997  | Dortmund  | 2000                    | 1.066           | 1.0       | 0.75      | 2         | 2         | 0.52      | 0:00:34  | 0.0  | y          | y      |
| 998  | Kassel    | 2000                    | 1.058           | 1.0       | 0.75      | 2         | 2         | 0.3       | 0:00:59  | 0.0  | y          | y      |
| 999  | Hannover  | 2000                    | 1.103           | 1.0       | 0.75      | 2         | 2         | 0.3       | 0:03:22  | 0.0  | y          | y      |
| 1000 | Krefeld   | 2000                    | 1.081           | 1.0       | 0.75      | 2         | 2         | 0.35      | 0:00:52  | 0.0  | y          | y      |
| 1001 | Münster   | 2000                    | 1.062           | 1.0       | 0.75      | 2         | 2         | 0.43      | 0:03:37  | 0.0  | y          | y      |
| 1002 | Paderborn | 2000                    | 1.047           | 1.0       | 0.75      | 2         | 2         | 0.48      | 0:00:59  | 0.0  | y          | y      |
| 1003 | Detmold   | 2000                    | 1.056           | 1.0       | 0.75      | 2         | 2         | 0.37      | 0:01:22  | 0.0  | y          | y      |
| 1004 | Bielefeld | 2000                    | 1.044           | 1.0       | 0.75      | 2         | 2         | 0.43      | 0:04:51  | 0.0  | y          | y      |
| 1005 | Gütersloh | 2000                    | 1.056           | 1.0       | 0.75      | 2         | 2         | 0.34      | 0:49:37  | 0.0  | y          | y      |
| 1006 | Soest     | 2000                    | 1.046           | 1.0       | 0.75      | 2         | 2         | 0.38      | 0:07:17  | 0.0  | y          | y      |
| 1007 | Dortmund  | 2000                    | 1.066           | 1.0       | 0.75      | 2         | 2         | 0.45      | 0:01:00  | 0.0  | y          | y      |
| 1008 | Kassel    | 2000                    | 1.058           | 1.0       | 0.75      | 2         | 2         | 0.37      | 0:03:44  | 0.0  | y          | y      |
| 1009 | Hannover  | 2000                    | 1.103           | 1.0       | 0.75      | 2         | 2         | 0.34      | 0:02:39  | 0.0  | y          | y      |
| 1010 | Krefeld   | 2000                    | 1.081           | 1.0       | 0.75      | 2         | 2         | 0.37      | 0:04:48  | 0.0  | y          | y      |
| 1011 | Münster   | 2000                    | 1.063           | 1.0       | 0.75      | 2         | 2         | 0.44      | 0:02:09  | 0.0  | y          | y      |
| 1012 | Paderborn | 2000                    | 1.047           | 1.0       | 0.75      | 2         | 2         | 0.44      | 0:06:26  | 0.0  | y          | y      |
| 1013 | Detmold   | 2000                    | 1.056           | 1.0       | 0.75      | 2         | 2         | 0.41      | 0:02:29  | 0.0  | y          | y      |
| 1014 | Bielefeld | 2000                    | 1.044           | 1.0       | 0.75      | 2         | 2         | 0.47      | 0:12:40  | 0.0  | y          | y      |
| 1015 | Gütersloh | 2000                    | 1.056           | 1.0       | 0.75      | 2         | 2         | 0.43      | *        | *    | *          | *      |
| 1016 | Soest     | 2000                    | 1.046           | 1.0       | 0.75      | 2         | 2         | 0.43      | 0:00:43  | 0.0  | y          | y      |
| 1017 | Dortmund  | 2000                    | 1.066           | 1.0       | 0.75      | 2         | 2         | 0.5       | 4:44:26  | 0.25 | y          | y      |
| 1018 | Kassel    | 2000                    | 1.058           | 1.0       | 0.75      | 2         | 2         | 0.43      | 0:02:57  | 0.0  | y          | y      |
| 1019 | Hannover  | 2000                    | 1.103           | 1.0       | 0.75      | 2         | 2         | 0.39      | 0:06:38  | 0.0  | y          | y      |
| 1020 | Krefeld   | 2000                    | 1.081           | 1.0       | 0.75      | 2         | 2         | 0.43      | 0:11:58  | 0.49 | y          | y      |
| 1021 | Münster   | 2000                    | 1.062           | 1.0       | 0.75      | 3         | 3         | 0.35      | 0:01:03  | 0.0  | y          | y      |
| 1022 | Paderborn | 2000                    | 1.047           | 1.0       | 0.75      | 3         | 3         | 0.54      | 0:00:32  | 0.0  | y          | y      |
| 1023 | Detmold   | 2000                    | 1.056           | 1.0       | 0.75      | 3         | 3         | 0.34      | 0:17:26  | 0.0  | y          | y      |
| 1024 | Bielefeld | 2000                    | 1.044           | 1.0       | 0.75      | 3         | 3         | 0.42      | 0:02:18  | 0.0  | y          | y      |
| 1025 | Gütersloh | 2000                    | 1.056           | 1.0       | 0.75      | 3         | 3         | 0.34      | 0:13:07  | 0.0  | y          | y      |

| #    | Network characteristics |           |                  |           |           |           |           |           | Solution |      | Simulation |        |
|------|-------------------------|-----------|------------------|-----------|-----------|-----------|-----------|-----------|----------|------|------------|--------|
|      | <i>cn</i>               | <i>bu</i> | $\frac{n_l}{bu}$ | <i>lf</i> | <i>tr</i> | <i>lt</i> | <i>tt</i> | <i>as</i> | Time     | Gap  | Volt       | Ampere |
| 1026 | Soest                   | 2000      | 1.046            | 1.0       | 0.75      | 3         | 3         | 0.36      | 0:01:09  | 0.0  | y          | y      |
| 1027 | Dortmund                | 2000      | 1.065            | 1.0       | 0.75      | 3         | 3         | 0.32      | 0:02:10  | 0.0  | y          | y      |
| 1028 | Kassel                  | 2000      | 1.058            | 1.0       | 0.75      | 3         | 3         | 0.37      | 0:00:36  | 0.0  | y          | y      |
| 1029 | Hannover                | 2000      | 1.103            | 1.0       | 0.75      | 3         | 3         | 0.33      | 0:03:56  | 0.0  | y          | y      |
| 1030 | Krefeld                 | 2000      | 1.081            | 1.0       | 0.75      | 3         | 3         | 0.38      | 0:01:00  | 0.0  | y          | y      |
| 1031 | Münster                 | 2000      | 1.062            | 1.0       | 0.75      | 3         | 3         | 0.46      | 0:03:13  | 0.0  | y          | y      |
| 1032 | Paderborn               | 2000      | 1.048            | 1.0       | 0.75      | 3         | 3         | 0.39      | 0:04:51  | 0.0  | n          | y      |
| 1033 | Detmold                 | 2000      | 1.056            | 1.0       | 0.75      | 3         | 3         | 0.37      | 0:26:44  | 0.0  | y          | y      |
| 1034 | Bielefeld               | 2000      | 1.044            | 1.0       | 0.75      | 3         | 3         | 0.47      | 0:03:12  | 0.0  | y          | y      |
| 1035 | Gütersloh               | 2000      | 1.057            | 1.0       | 0.75      | 3         | 3         | 0.37      | 0:09:09  | 0.0  | y          | y      |
| 1036 | Soest                   | 2000      | 1.046            | 1.0       | 0.75      | 3         | 3         | 0.41      | 0:41:19  | 0.06 | y          | y      |
| 1037 | Dortmund                | 2000      | 1.066            | 1.0       | 0.75      | 3         | 3         | 0.49      | 0:02:52  | 0.0  | y          | y      |
| 1038 | Kassel                  | 2000      | 1.058            | 1.0       | 0.75      | 3         | 3         | 0.38      | 0:00:52  | 0.0  | y          | y      |
| 1039 | Hannover                | 2000      | 1.103            | 1.0       | 0.75      | 3         | 3         | 0.37      | 0:01:59  | 0.0  | y          | y      |
| 1040 | Krefeld                 | 2000      | 1.079            | 1.0       | 0.75      | 3         | 3         | 0.36      | 0:01:36  | 0.0  | y          | y      |
| 1041 | Münster                 | 2000      | 1.063            | 1.0       | 0.75      | 3         | 3         | 0.47      | 0:03:37  | 0.0  | y          | y      |
| 1042 | Paderborn               | 2000      | 1.048            | 1.0       | 0.75      | 3         | 3         | 0.43      | 0:27:23  | 0.0  | n          | y      |
| 1043 | Detmold                 | 2000      | 1.056            | 1.0       | 0.75      | 3         | 3         | 0.46      | 0:03:10  | 0.37 | y          | y      |
| 1044 | Bielefeld               | 2000      | 1.044            | 1.0       | 0.75      | 3         | 3         | 0.5       | 0:11:30  | 0.0  | y          | y      |
| 1045 | Gütersloh               | 2000      | 1.057            | 1.0       | 0.75      | 3         | 3         | 0.49      | 0:15:39  | 0.0  | y          | y      |
| 1046 | Soest                   | 2000      | 1.046            | 1.0       | 0.75      | 3         | 3         | 0.43      | 0:15:13  | 0.16 | y          | y      |
| 1047 | Dortmund                | 2000      | 1.066            | 1.0       | 0.75      | 3         | 3         | 0.53      | 2:57:33  | 0.34 | y          | y      |
| 1048 | Kassel                  | 2000      | 1.058            | 1.0       | 0.75      | 3         | 3         | 0.46      | 0:09:05  | 0.0  | y          | y      |
| 1049 | Hannover                | 2000      | 1.103            | 1.0       | 0.75      | 3         | 3         | 0.45      | 13:55:34 | 0.15 | y          | y      |
| 1050 | Krefeld                 | 2000      | 1.081            | 1.0       | 0.75      | 3         | 3         | 0.48      | 0:16:51  | 0.0  | y          | y      |
| 1051 | Münster                 | 2000      | 1.063            | 1.0       | 0.75      | 4         | 4         | 0.47      | 0:01:51  | 0.0  | y          | y      |
| 1052 | Paderborn               | 2000      | 1.047            | 1.0       | 0.75      | 4         | 4         | 0.56      | 0:01:56  | 0.0  | y          | y      |
| 1053 | Detmold                 | 2000      | 1.056            | 1.0       | 0.75      | 4         | 4         | 0.4       | 0:01:33  | 0.0  | y          | y      |
| 1054 | Bielefeld               | 2000      | 1.044            | 1.0       | 0.75      | 4         | 4         | 0.45      | 0:01:29  | 0.0  | y          | y      |
| 1055 | Gütersloh               | 2000      | 1.057            | 1.0       | 0.75      | 4         | 4         | 0.39      | 0:05:19  | 0.0  | y          | y      |
| 1056 | Soest                   | 2000      | 1.046            | 1.0       | 0.75      | 4         | 4         | 0.39      | 0:03:53  | 0.0  | y          | y      |
| 1057 | Dortmund                | 2000      | 1.066            | 1.0       | 0.75      | 4         | 4         | 0.56      | 0:00:59  | 0.0  | y          | y      |
| 1058 | Kassel                  | 2000      | 1.058            | 1.0       | 0.75      | 4         | 4         | 0.36      | 0:02:43  | 0.0  | y          | y      |
| 1059 | Hannover                | 2000      | 1.103            | 1.0       | 0.75      | 4         | 4         | 0.36      | 0:05:37  | 0.0  | y          | y      |
| 1060 | Krefeld                 | 2000      | 1.081            | 1.0       | 0.75      | 4         | 4         | 0.41      | 0:01:29  | 0.0  | y          | y      |
| 1061 | Münster                 | 2000      | 1.063            | 1.0       | 0.75      | 4         | 4         | 0.49      | 0:03:01  | 0.0  | y          | y      |
| 1062 | Paderborn               | 2000      | 1.047            | 1.0       | 0.75      | 4         | 4         | 0.54      | 0:02:48  | 0.0  | y          | y      |
| 1063 | Detmold                 | 2000      | 1.056            | 1.0       | 0.75      | 4         | 4         | 0.4       | 0:24:03  | 0.0  | y          | y      |
| 1064 | Bielefeld               | 2000      | 1.044            | 1.0       | 0.75      | 4         | 4         | 0.5       | 0:07:46  | 0.0  | y          | y      |
| 1065 | Gütersloh               | 2000      | 1.056            | 1.0       | 0.75      | 4         | 4         | 0.38      | 2:47:24  | 0.42 | y          | y      |
| 1066 | Soest                   | 2000      | 1.046            | 1.0       | 0.75      | 4         | 4         | 0.44      | 0:21:45  | 0.0  | y          | y      |
| 1067 | Dortmund                | 2000      | 1.066            | 1.0       | 0.75      | 4         | 4         | 0.52      | 0:03:21  | 0.15 | y          | y      |
| 1068 | Kassel                  | 2000      | 1.058            | 1.0       | 0.75      | 4         | 4         | 0.42      | 0:07:16  | 0.0  | y          | y      |
| 1069 | Hannover                | 2000      | 1.103            | 1.0       | 0.75      | 4         | 4         | 0.46      | 7:19:20  | 0.0  | y          | y      |
| 1070 | Krefeld                 | 2000      | 1.081            | 1.0       | 0.75      | 4         | 4         | 0.43      | 0:12:11  | 0.0  | y          | y      |
| 1071 | Münster                 | 2000      | 1.062            | 1.0       | 0.75      | 4         | 4         | 0.49      | 0:01:35  | 0.0  | y          | y      |
| 1072 | Paderborn               | 2000      | 1.048            | 1.0       | 0.75      | 4         | 4         | 0.45      | 2:55:38  | 0.1  | n          | y      |
| 1073 | Detmold                 | 2000      | 1.056            | 1.0       | 0.75      | 4         | 4         | 0.46      | 0:40:51  | 0.0  | y          | y      |
| 1074 | Bielefeld               | 2000      | 1.044            | 1.0       | 0.75      | 4         | 4         | 0.53      | 1:58:06  | 0.0  | y          | y      |
| 1075 | Gütersloh               | 2000      | 1.057            | 1.0       | 0.75      | 4         | 4         | 0.47      | 1:43:08  | 0.0  | y          | y      |
| 1076 | Soest                   | 2000      | 1.046            | 1.0       | 0.75      | 4         | 4         | 0.45      | 0:04:07  | 0.0  | y          | y      |
| 1077 | Dortmund                | 2000      | 1.066            | 1.0       | 0.75      | 4         | 4         | 0.56      | 5:00:48  | 0.25 | y          | y      |

| #    | Network characteristics |           |                 |           |           |           |           |           | Solution |      | Simulation |        |
|------|-------------------------|-----------|-----------------|-----------|-----------|-----------|-----------|-----------|----------|------|------------|--------|
|      | <i>cn</i>               | <i>bu</i> | $\frac{nl}{bu}$ | <i>lf</i> | <i>tr</i> | <i>lt</i> | <i>tt</i> | <i>as</i> | Time     | Gap  | Volt       | Ampere |
| 1078 | Kassel                  | 2000      | 1.058           | 1.0       | 0.75      | 4         | 4         | 0.48      | 0:33:30  | 0.0  | y          | y      |
| 1079 | Hannover                | 2000      | 1.103           | 1.0       | 0.75      | 4         | 4         | 0.47      | 3:21:56  | 0.0  | y          | y      |
| 1080 | Krefeld                 | 2000      | 1.081           | 1.0       | 0.75      | 4         | 4         | 0.51      | 1:39:03  | 0.0  | y          | y      |
| 1081 | Münster                 | 2000      | 1.065           | 0.83      | 1.0       | 2         | 2         | 0.34      | 0:00:51  | 0.0  | y          | y      |
| 1082 | Paderborn               | 2000      | 1.049           | 0.83      | 1.0       | 2         | 2         | 0.27      | 0:00:41  | 0.0  | y          | y      |
| 1083 | Detmold                 | 2000      | 1.059           | 0.83      | 1.0       | 2         | 2         | 0.33      | 0:00:43  | 0.0  | y          | y      |
| 1084 | Bielefeld               | 2000      | 1.044           | 0.83      | 1.0       | 2         | 2         | 0.31      | 0:00:37  | 0.0  | y          | y      |
| 1085 | Gütersloh               | 2000      | 1.060           | 0.83      | 1.0       | 2         | 2         | 0.32      | 0:01:35  | 0.0  | y          | y      |
| 1086 | Soest                   | 2000      | 1.048           | 0.83      | 1.0       | 2         | 2         | 0.26      | 0:01:14  | 0.0  | y          | y      |
| 1087 | Dortmund                | 2000      | 1.067           | 0.83      | 1.0       | 2         | 2         | 0.35      | 0:01:29  | 0.0  | y          | y      |
| 1088 | Kassel                  | 2000      | 1.060           | 0.83      | 1.0       | 2         | 2         | 0.29      | 0:00:49  | 0.0  | y          | y      |
| 1089 | Hannover                | 2000      | 1.105           | 0.83      | 1.0       | 2         | 2         | 0.26      | 0:05:00  | 0.0  | y          | y      |
| 1090 | Krefeld                 | 2000      | 1.083           | 0.83      | 1.0       | 2         | 2         | 0.37      | 0:05:41  | 0.0  | y          | y      |
| 1091 | Münster                 | 2000      | 1.065           | 0.83      | 1.0       | 2         | 2         | 0.36      | 0:04:35  | 0.0  | y          | y      |
| 1092 | Paderborn               | 2000      | 1.049           | 0.83      | 1.0       | 2         | 2         | 0.34      | 0:34:24  | 0.0  | y          | y      |
| 1093 | Detmold                 | 2000      | 1.058           | 0.83      | 1.0       | 2         | 2         | 0.34      | 0:01:29  | 0.0  | y          | y      |
| 1094 | Bielefeld               | 2000      | 1.044           | 0.83      | 1.0       | 2         | 2         | 0.36      | 0:01:22  | 0.0  | y          | y      |
| 1095 | Gütersloh               | 2000      | 1.060           | 0.83      | 1.0       | 2         | 2         | 0.37      | 0:01:53  | 0.0  | y          | y      |
| 1096 | Soest                   | 2000      | 1.048           | 0.83      | 1.0       | 2         | 2         | 0.34      | 0:02:10  | 0.0  | y          | y      |
| 1097 | Dortmund                | 2000      | 1.067           | 0.83      | 1.0       | 2         | 2         | 0.37      | 0:01:07  | 0.0  | y          | y      |
| 1098 | Kassel                  | 2000      | 1.059           | 0.83      | 1.0       | 2         | 2         | 0.41      | 0:00:51  | 0.0  | y          | y      |
| 1099 | Hannover                | 2000      | 1.105           | 0.83      | 1.0       | 2         | 2         | 0.32      | 0:06:31  | 0.0  | y          | y      |
| 1100 | Krefeld                 | 2000      | 1.083           | 0.83      | 1.0       | 2         | 2         | 0.37      | 0:03:34  | 0.0  | y          | y      |
| 1101 | Münster                 | 2000      | 1.065           | 0.83      | 1.0       | 2         | 2         | 0.45      | 0:04:11  | 0.0  | y          | y      |
| 1102 | Paderborn               | 2000      | 1.049           | 0.83      | 1.0       | 2         | 2         | 0.4       | 0:01:22  | 0.0  | y          | y      |
| 1103 | Detmold                 | 2000      | 1.058           | 0.83      | 1.0       | 2         | 2         | 0.42      | 0:03:16  | 0.0  | y          | y      |
| 1104 | Bielefeld               | 2000      | 1.044           | 0.83      | 1.0       | 2         | 2         | 0.4       | 0:00:59  | 0.0  | y          | y      |
| 1105 | Gütersloh               | 2000      | 1.060           | 0.83      | 1.0       | 2         | 2         | 0.39      | 0:01:38  | 0.0  | y          | y      |
| 1106 | Soest                   | 2000      | 1.048           | 0.83      | 1.0       | 2         | 2         | 0.4       | 0:03:15  | 0.04 | y          | y      |
| 1107 | Dortmund                | 2000      | 1.067           | 0.83      | 1.0       | 2         | 2         | 0.4       | 0:02:52  | 0.0  | y          | y      |
| 1108 | Kassel                  | 2000      | 1.059           | 0.83      | 1.0       | 2         | 2         | 0.45      | 0:01:03  | 0.0  | y          | y      |
| 1109 | Hannover                | 2000      | 1.105           | 0.83      | 1.0       | 2         | 2         | 0.42      | 0:03:34  | 0.0  | y          | y      |
| 1110 | Krefeld                 | 2000      | 1.083           | 0.83      | 1.0       | 2         | 2         | 0.39      | 0:01:45  | 0.0  | y          | y      |
| 1111 | Münster                 | 2000      | 1.065           | 0.83      | 1.0       | 3         | 3         | 0.45      | 0:00:49  | 0.0  | y          | y      |
| 1112 | Paderborn               | 2000      | 1.048           | 0.83      | 1.0       | 3         | 3         | 0.32      | 0:01:18  | 0.0  | y          | y      |
| 1113 | Detmold                 | 2000      | 1.058           | 0.83      | 1.0       | 3         | 3         | 0.3       | 0:02:59  | 0.0  | y          | y      |
| 1114 | Bielefeld               | 2000      | 1.044           | 0.83      | 1.0       | 3         | 3         | 0.34      | 0:05:14  | 0.0  | y          | y      |
| 1115 | Gütersloh               | 2000      | 1.060           | 0.83      | 1.0       | 3         | 3         | 0.36      | 0:03:18  | 0.0  | y          | y      |
| 1116 | Soest                   | 2000      | 1.048           | 0.83      | 1.0       | 3         | 3         | 0.34      | 0:00:29  | 0.0  | y          | y      |
| 1117 | Dortmund                | 2000      | 1.067           | 0.83      | 1.0       | 3         | 3         | 0.35      | 0:01:44  | 0.0  | y          | y      |
| 1118 | Kassel                  | 2000      | 1.060           | 0.83      | 1.0       | 3         | 3         | 0.33      | 0:02:35  | 0.0  | y          | y      |
| 1119 | Hannover                | 2000      | 1.105           | 0.83      | 1.0       | 3         | 3         | 0.42      | 0:03:26  | 0.0  | y          | y      |
| 1120 | Krefeld                 | 2000      | 1.082           | 0.83      | 1.0       | 3         | 3         | 0.46      | 0:03:30  | 0.0  | y          | y      |
| 1121 | Münster                 | 2000      | 1.065           | 0.83      | 1.0       | 3         | 3         | 0.39      | 0:02:04  | 0.0  | y          | y      |
| 1122 | Paderborn               | 2000      | 1.049           | 0.83      | 1.0       | 3         | 3         | 0.36      | 0:49:32  | 0.0  | y          | y      |
| 1123 | Detmold                 | 2000      | 1.058           | 0.83      | 1.0       | 3         | 3         | 0.37      | 0:18:38  | 0.0  | y          | y      |
| 1124 | Bielefeld               | 2000      | 1.044           | 0.83      | 1.0       | 3         | 3         | 0.38      | 0:04:55  | 0.0  | y          | y      |
| 1125 | Gütersloh               | 2000      | 1.059           | 0.83      | 1.0       | 3         | 3         | 0.41      | 0:37:19  | 0.0  | y          | y      |
| 1126 | Soest                   | 2000      | 1.048           | 0.83      | 1.0       | 3         | 3         | 0.37      | 0:05:23  | 0.0  | y          | y      |
| 1127 | Dortmund                | 2000      | 1.067           | 0.83      | 1.0       | 3         | 3         | 0.32      | 1:36:35  | 0.0  | y          | y      |
| 1128 | Kassel                  | 2000      | 1.060           | 0.83      | 1.0       | 3         | 3         | 0.36      | 0:01:06  | 0.0  | y          | y      |
| 1129 | Hannover                | 2000      | 1.105           | 0.83      | 1.0       | 3         | 3         | 0.35      | 0:02:04  | 0.0  | y          | y      |

| #    | Network characteristics |           |                  |           |           |           |           |           | Solution |     | Simulation |        |
|------|-------------------------|-----------|------------------|-----------|-----------|-----------|-----------|-----------|----------|-----|------------|--------|
|      | <i>cn</i>               | <i>bu</i> | $\frac{n_l}{bu}$ | <i>lf</i> | <i>tr</i> | <i>lt</i> | <i>tt</i> | <i>as</i> | Time     | Gap | Volt       | Ampere |
| 1130 | Krefeld                 | 2000      | 1.083            | 0.83      | 1.0       | 3         | 3         | 0.4       | 0:02:54  | 0.0 | y          | y      |
| 1131 | Münster                 | 2000      | 1.065            | 0.83      | 1.0       | 3         | 3         | 0.47      | 0:08:54  | 0.0 | y          | y      |
| 1132 | Paderborn               | 2000      | 1.049            | 0.83      | 1.0       | 3         | 3         | 0.42      | 0:02:05  | 0.0 | y          | y      |
| 1133 | Detmold                 | 2000      | 1.058            | 0.83      | 1.0       | 3         | 3         | 0.44      | 0:15:12  | 0.0 | y          | y      |
| 1134 | Bielefeld               | 2000      | 1.044            | 0.83      | 1.0       | 3         | 3         | 0.42      | 0:03:59  | 0.0 | y          | y      |
| 1135 | Gütersloh               | 2000      | 1.060            | 0.83      | 1.0       | 3         | 3         | 0.42      | 0:01:38  | 0.0 | y          | y      |
| 1136 | Soest                   | 2000      | 1.048            | 0.83      | 1.0       | 3         | 3         | 0.47      | 0:02:31  | 0.0 | y          | y      |
| 1137 | Dortmund                | 2000      | 1.067            | 0.83      | 1.0       | 3         | 3         | 0.44      | 1:08:39  | 0.0 | y          | y      |
| 1138 | Kassel                  | 2000      | 1.060            | 0.83      | 1.0       | 3         | 3         | 0.47      | 0:04:39  | 0.0 | y          | y      |
| 1139 | Hannover                | 2000      | 1.105            | 0.83      | 1.0       | 3         | 3         | 0.4       | 11:14:33 | 0.0 | y          | y      |
| 1140 | Krefeld                 | 2000      | 1.083            | 0.83      | 1.0       | 3         | 3         | 0.42      | 0:04:41  | 0.0 | y          | y      |
| 1141 | Münster                 | 2000      | 1.065            | 0.83      | 1.0       | 4         | 4         | 0.55      | 0:01:08  | 0.0 | y          | y      |
| 1142 | Paderborn               | 2000      | 1.049            | 0.83      | 1.0       | 4         | 4         | 0.33      | 0:01:13  | 0.0 | y          | y      |
| 1143 | Detmold                 | 2000      | 1.059            | 0.83      | 1.0       | 4         | 4         | 0.39      | 0:03:02  | 0.0 | y          | y      |
| 1144 | Bielefeld               | 2000      | 1.044            | 0.83      | 1.0       | 4         | 4         | 0.37      | 0:01:26  | 0.0 | y          | y      |
| 1145 | Gütersloh               | 2000      | 1.060            | 0.83      | 1.0       | 4         | 4         | 0.38      | 0:01:05  | 0.0 | y          | y      |
| 1146 | Soest                   | 2000      | 1.048            | 0.83      | 1.0       | 4         | 4         | 0.31      | 0:02:35  | 0.0 | y          | y      |
| 1147 | Dortmund                | 2000      | 1.067            | 0.83      | 1.0       | 4         | 4         | 0.41      | 0:03:19  | 0.0 | y          | y      |
| 1148 | Kassel                  | 2000      | 1.059            | 0.83      | 1.0       | 4         | 4         | 0.41      | 0:01:05  | 0.0 | y          | y      |
| 1149 | Hannover                | 2000      | 1.105            | 0.83      | 1.0       | 4         | 4         | 0.31      | 0:03:29  | 0.0 | y          | y      |
| 1150 | Krefeld                 | 2000      | 1.083            | 0.83      | 1.0       | 4         | 4         | 0.46      | 0:05:52  | 0.0 | y          | y      |
| 1151 | Münster                 | 2000      | 1.065            | 0.83      | 1.0       | 4         | 4         | 0.41      | 0:02:26  | 0.0 | y          | y      |
| 1152 | Paderborn               | 2000      | 1.049            | 0.83      | 1.0       | 4         | 4         | 0.42      | 0:02:07  | 0.0 | y          | y      |
| 1153 | Detmold                 | 2000      | 1.058            | 0.83      | 1.0       | 4         | 4         | 0.37      | 0:02:53  | 0.0 | y          | y      |
| 1154 | Bielefeld               | 2000      | 1.044            | 0.83      | 1.0       | 4         | 4         | 0.41      | 0:03:42  | 0.0 | y          | y      |
| 1155 | Gütersloh               | 2000      | 1.060            | 0.83      | 1.0       | 4         | 4         | 0.43      | 0:04:01  | 0.0 | y          | y      |
| 1156 | Soest                   | 2000      | 1.048            | 0.83      | 1.0       | 4         | 4         | 0.39      | 0:06:38  | 0.0 | y          | y      |
| 1157 | Dortmund                | 2000      | 1.067            | 0.83      | 1.0       | 4         | 4         | 0.43      | 0:01:40  | 0.0 | y          | y      |
| 1158 | Kassel                  | 2000      | 1.059            | 0.83      | 1.0       | 4         | 4         | 0.47      | 0:01:16  | 0.0 | y          | y      |
| 1159 | Hannover                | 2000      | 1.105            | 0.83      | 1.0       | 4         | 4         | 0.47      | 0:04:30  | 0.0 | y          | y      |
| 1160 | Krefeld                 | 2000      | 1.083            | 0.83      | 1.0       | 4         | 4         | 0.43      | 0:15:02  | 0.0 | y          | y      |
| 1161 | Münster                 | 2000      | 1.063            | 0.83      | 1.0       | 4         | 4         | 0.45      | 0:02:32  | 0.0 | y          | y      |
| 1162 | Paderborn               | 2000      | 1.049            | 0.83      | 1.0       | 4         | 4         | 0.44      | 0:05:03  | 0.0 | y          | y      |
| 1163 | Detmold                 | 2000      | 1.059            | 0.83      | 1.0       | 4         | 4         | 0.44      | 0:06:03  | 0.0 | y          | y      |
| 1164 | Bielefeld               | 2000      | 1.044            | 0.83      | 1.0       | 4         | 4         | 0.44      | 0:04:12  | 0.0 | y          | y      |
| 1165 | Gütersloh               | 2000      | 1.060            | 0.83      | 1.0       | 4         | 4         | 0.44      | 0:06:36  | 0.0 | y          | y      |
| 1166 | Soest                   | 2000      | 1.048            | 0.83      | 1.0       | 4         | 4         | 0.49      | 0:03:01  | 0.0 | y          | y      |
| 1167 | Dortmund                | 2000      | 1.067            | 0.83      | 1.0       | 4         | 4         | 0.46      | 0:17:35  | 0.0 | y          | y      |
| 1168 | Kassel                  | 2000      | 1.060            | 0.83      | 1.0       | 4         | 4         | 0.43      | 0:06:36  | 0.0 | y          | y      |
| 1169 | Hannover                | 2000      | 1.105            | 0.83      | 1.0       | 4         | 4         | 0.47      | 0:17:03  | 0.0 | y          | y      |
| 1170 | Krefeld                 | 2000      | 1.083            | 0.83      | 1.0       | 4         | 4         | 0.46      | 1:11:50  | 0.0 | y          | y      |
| 1171 | Münster                 | 2000      | 1.065            | 1.34      | 1.0       | 2         | 2         | 0.51      | 0:01:18  | 0.0 | y          | y      |
| 1172 | Paderborn               | 2000      | 1.050            | 1.34      | 1.0       | 2         | 2         | 0.28      | 0:00:56  | 0.0 | y          | y      |
| 1173 | Detmold                 | 2000      | 1.059            | 1.34      | 1.0       | 2         | 2         | 0.33      | 0:00:49  | 0.0 | y          | y      |
| 1174 | Bielefeld               | 2000      | 1.044            | 1.34      | 1.0       | 2         | 2         | 0.31      | 0:00:37  | 0.0 | y          | y      |
| 1175 | Gütersloh               | 2000      | 1.060            | 1.34      | 1.0       | 2         | 2         | 0.32      | 0:01:00  | 0.0 | y          | y      |
| 1176 | Soest                   | 2000      | 1.048            | 1.34      | 1.0       | 2         | 2         | 0.26      | 0:01:08  | 0.0 | y          | y      |
| 1177 | Dortmund                | 2000      | 1.067            | 1.34      | 1.0       | 2         | 2         | 0.31      | 0:00:58  | 0.0 | y          | y      |
| 1178 | Kassel                  | 2000      | 1.060            | 1.34      | 1.0       | 2         | 2         | 0.29      | 0:01:39  | 0.0 | y          | y      |
| 1179 | Hannover                | 2000      | 1.105            | 1.34      | 1.0       | 2         | 2         | 0.39      | 0:05:03  | 0.0 | y          | y      |
| 1180 | Krefeld                 | 2000      | 1.083            | 1.34      | 1.0       | 2         | 2         | 0.37      | 0:00:58  | 0.0 | y          | y      |
| 1181 | Münster                 | 2000      | 1.065            | 1.34      | 1.0       | 2         | 2         | 0.36      | 0:01:53  | 0.0 | y          | y      |

| #    | Network characteristics |           |                 |           |           |           |           |           | Solution |      | Simulation |        |
|------|-------------------------|-----------|-----------------|-----------|-----------|-----------|-----------|-----------|----------|------|------------|--------|
|      | <i>cn</i>               | <i>bu</i> | $\frac{nl}{bu}$ | <i>lf</i> | <i>tr</i> | <i>lt</i> | <i>tt</i> | <i>as</i> | Time     | Gap  | Volt       | Ampere |
| 1182 | Paderborn               | 2000      | 1.049           | 1.34      | 1.0       | 2         | 2         | 0.37      | 0:03:31  | 0.0  | y          | y      |
| 1183 | Detmold                 | 2000      | 1.059           | 1.34      | 1.0       | 2         | 2         | 0.38      | 0:09:05  | 0.08 | y          | y      |
| 1184 | Bielefeld               | 2000      | 1.044           | 1.34      | 1.0       | 2         | 2         | 0.36      | 0:01:12  | 0.0  | y          | y      |
| 1185 | Gütersloh               | 2000      | 1.060           | 1.34      | 1.0       | 2         | 2         | 0.37      | 0:01:44  | 0.0  | n          | y      |
| 1186 | Soest                   | 2000      | 1.048           | 1.34      | 1.0       | 2         | 2         | 0.34      | 0:02:53  | 0.0  | y          | y      |
| 1187 | Dortmund                | 2000      | 1.067           | 1.34      | 1.0       | 2         | 2         | 0.3       | 1:25:25  | 0.28 | y          | y      |
| 1188 | Kassel                  | 2000      | 1.059           | 1.34      | 1.0       | 2         | 2         | 0.41      | 0:01:09  | 0.0  | y          | y      |
| 1189 | Hannover                | 2000      | 1.105           | 1.34      | 1.0       | 2         | 2         | 0.41      | 0:03:48  | 0.0  | y          | y      |
| 1190 | Krefeld                 | 2000      | 1.083           | 1.34      | 1.0       | 2         | 2         | 0.37      | 0:08:38  | 0.0  | y          | y      |
| 1191 | Münster                 | 2000      | 1.064           | 1.34      | 1.0       | 2         | 2         | 0.41      | 0:05:33  | 0.0  | y          | y      |
| 1192 | Paderborn               | 2000      | 1.050           | 1.34      | 1.0       | 2         | 2         | 0.43      | 0:01:39  | 0.0  | y          | y      |
| 1193 | Detmold                 | 2000      | 1.058           | 1.34      | 1.0       | 2         | 2         | 0.42      | 0:03:47  | 0.19 | y          | y      |
| 1194 | Bielefeld               | 2000      | 1.044           | 1.34      | 1.0       | 2         | 2         | 0.4       | 0:02:43  | 0.0  | y          | y      |
| 1195 | Gütersloh               | 2000      | 1.060           | 1.34      | 1.0       | 2         | 2         | 0.39      | 0:01:42  | 0.0  | y          | y      |
| 1196 | Soest                   | 2000      | 1.048           | 1.34      | 1.0       | 2         | 2         | 0.4       | 2:17:18  | 0.1  | y          | y      |
| 1197 | Dortmund                | 2000      | 1.067           | 1.34      | 1.0       | 2         | 2         | 0.4       | 0:24:24  | 0.19 | y          | y      |
| 1198 | Kassel                  | 2000      | 1.059           | 1.34      | 1.0       | 2         | 2         | 0.45      | 0:01:16  | 0.0  | y          | y      |
| 1199 | Hannover                | 2000      | 1.105           | 1.34      | 1.0       | 2         | 2         | 0.38      | *        | *    | *          | *      |
| 1200 | Krefeld                 | 2000      | 1.082           | 1.34      | 1.0       | 2         | 2         | 0.41      | 0:02:36  | 0.0  | y          | y      |
| 1201 | Münster                 | 2000      | 1.065           | 1.34      | 1.0       | 3         | 3         | 0.38      | 0:02:04  | 0.0  | y          | y      |
| 1202 | Paderborn               | 2000      | 1.049           | 1.34      | 1.0       | 3         | 3         | 0.3       | 0:01:26  | 0.0  | y          | y      |
| 1203 | Detmold                 | 2000      | 1.058           | 1.34      | 1.0       | 3         | 3         | 0.3       | 0:09:31  | 0.0  | y          | y      |
| 1204 | Bielefeld               | 2000      | 1.044           | 1.34      | 1.0       | 3         | 3         | 0.34      | 0:00:54  | 0.0  | y          | y      |
| 1205 | Gütersloh               | 2000      | 1.060           | 1.34      | 1.0       | 3         | 3         | 0.36      | 0:01:20  | 0.0  | y          | y      |
| 1206 | Soest                   | 2000      | 1.048           | 1.34      | 1.0       | 3         | 3         | 0.34      | 0:01:10  | 0.0  | y          | y      |
| 1207 | Dortmund                | 2000      | 1.067           | 1.34      | 1.0       | 3         | 3         | 0.35      | 0:01:21  | 0.0  | y          | y      |
| 1208 | Kassel                  | 2000      | 1.059           | 1.34      | 1.0       | 3         | 3         | 0.38      | 0:01:19  | 0.0  | y          | y      |
| 1209 | Hannover                | 2000      | 1.105           | 1.34      | 1.0       | 3         | 3         | 0.29      | 0:07:58  | 0.0  | y          | y      |
| 1210 | Krefeld                 | 2000      | 1.083           | 1.34      | 1.0       | 3         | 3         | 0.43      | 0:01:41  | 0.0  | y          | y      |
| 1211 | Münster                 | 2000      | 1.065           | 1.34      | 1.0       | 3         | 3         | 0.34      | 0:03:22  | 0.0  | y          | y      |
| 1212 | Paderborn               | 2000      | 1.049           | 1.34      | 1.0       | 3         | 3         | 0.36      | 8:48:14  | 0.25 | n          | y      |
| 1213 | Detmold                 | 2000      | 1.058           | 1.34      | 1.0       | 3         | 3         | 0.37      | 0:21:05  | 0.2  | y          | y      |
| 1214 | Bielefeld               | 2000      | 1.044           | 1.34      | 1.0       | 3         | 3         | 0.38      | 0:03:22  | 0.0  | y          | y      |
| 1215 | Gütersloh               | 2000      | 1.060           | 1.34      | 1.0       | 3         | 3         | 0.4       | 0:04:13  | 0.48 | y          | y      |
| 1216 | Soest                   | 2000      | 1.048           | 1.34      | 1.0       | 3         | 3         | 0.37      | 0:03:52  | 0.0  | y          | y      |
| 1217 | Dortmund                | 2000      | 1.067           | 1.34      | 1.0       | 3         | 3         | 0.32      | 7:30:05  | 0.28 | y          | y      |
| 1218 | Kassel                  | 2000      | 1.059           | 1.34      | 1.0       | 3         | 3         | 0.44      | 0:01:16  | 0.0  | y          | y      |
| 1219 | Hannover                | 2000      | 1.105           | 1.34      | 1.0       | 3         | 3         | 0.35      | 0:07:32  | 0.0  | y          | y      |
| 1220 | Krefeld                 | 2000      | 1.083           | 1.34      | 1.0       | 3         | 3         | 0.37      | 0:12:02  | 0.29 | y          | y      |
| 1221 | Münster                 | 2000      | 1.065           | 1.34      | 1.0       | 3         | 3         | 0.42      | 0:05:06  | 0.0  | y          | y      |
| 1222 | Paderborn               | 2000      | 1.050           | 1.34      | 1.0       | 3         | 3         | 0.45      | 0:53:35  | 0.17 | y          | y      |
| 1223 | Detmold                 | 2000      | 1.058           | 1.34      | 1.0       | 3         | 3         | 0.44      | 1:04:53  | 0.3  | y          | y      |
| 1224 | Bielefeld               | 2000      | 1.044           | 1.34      | 1.0       | 3         | 3         | 0.42      | 0:04:45  | 0.0  | y          | y      |
| 1225 | Gütersloh               | 2000      | 1.060           | 1.34      | 1.0       | 3         | 3         | 0.42      | 0:03:47  | 0.0  | y          | y      |
| 1226 | Soest                   | 2000      | 1.048           | 1.34      | 1.0       | 3         | 3         | 0.47      | 0:03:52  | 0.0  | y          | y      |
| 1227 | Dortmund                | 2000      | 1.067           | 1.34      | 1.0       | 3         | 3         | 0.42      | 3:39:49  | 0.35 | y          | y      |
| 1228 | Kassel                  | 2000      | 1.059           | 1.34      | 1.0       | 3         | 3         | 0.48      | 0:03:46  | 0.0  | y          | y      |
| 1229 | Hannover                | 2000      | 1.105           | 1.34      | 1.0       | 3         | 3         | 0.42      | 0:49:40  | 0.0  | y          | y      |
| 1230 | Krefeld                 | 2000      | 1.083           | 1.34      | 1.0       | 3         | 3         | 0.44      | 0:05:52  | 0.0  | y          | y      |
| 1231 | Münster                 | 2000      | 1.065           | 1.34      | 1.0       | 4         | 4         | 0.4       | 0:01:07  | 0.0  | y          | y      |
| 1232 | Paderborn               | 2000      | 1.049           | 1.34      | 1.0       | 4         | 4         | 0.32      | 0:02:52  | 0.0  | y          | y      |
| 1233 | Detmold                 | 2000      | 1.058           | 1.34      | 1.0       | 4         | 4         | 0.32      | 0:30:33  | 0.0  | y          | y      |

| #    | Network characteristics |           |                 |           |           |           |           |           | Solution |      | Simulation |        |
|------|-------------------------|-----------|-----------------|-----------|-----------|-----------|-----------|-----------|----------|------|------------|--------|
|      | <i>cn</i>               | <i>bu</i> | $\frac{nl}{bu}$ | <i>lf</i> | <i>tr</i> | <i>lt</i> | <i>tt</i> | <i>as</i> | Time     | Gap  | Volt       | Ampere |
| 1234 | Bielefeld               | 2000      | 1.044           | 1.34      | 1.0       | 4         | 4         | 0.37      | 0:00:54  | 0.0  | y          | y      |
| 1235 | Gütersloh               | 2000      | 1.060           | 1.34      | 1.0       | 4         | 4         | 0.38      | 0:01:35  | 0.0  | y          | y      |
| 1236 | Soest                   | 2000      | 1.048           | 1.34      | 1.0       | 4         | 4         | 0.37      | 0:01:02  | 0.0  | y          | y      |
| 1237 | Dortmund                | 2000      | 1.067           | 1.34      | 1.0       | 4         | 4         | 0.36      | 0:01:02  | 0.0  | y          | y      |
| 1238 | Kassel                  | 2000      | 1.060           | 1.34      | 1.0       | 4         | 4         | 0.35      | 0:02:49  | 0.0  | y          | y      |
| 1239 | Hannover                | 2000      | 1.105           | 1.34      | 1.0       | 4         | 4         | 0.45      | 0:01:33  | 0.0  | y          | y      |
| 1240 | Krefeld                 | 2000      | 1.083           | 1.34      | 1.0       | 4         | 4         | 0.43      | 0:03:13  | 0.0  | y          | y      |
| 1241 | Münster                 | 2000      | 1.065           | 1.34      | 1.0       | 4         | 4         | 0.41      | 0:04:51  | 0.0  | y          | y      |
| 1242 | Paderborn               | 2000      | 1.049           | 1.34      | 1.0       | 4         | 4         | 0.38      | *        | *    | *          | *      |
| 1243 | Detmold                 | 2000      | 1.058           | 1.34      | 1.0       | 4         | 4         | 0.39      | 0:24:36  | 0.0  | y          | y      |
| 1244 | Bielefeld               | 2000      | 1.044           | 1.34      | 1.0       | 4         | 4         | 0.41      | 0:04:11  | 0.0  | y          | y      |
| 1245 | Gütersloh               | 2000      | 1.060           | 1.34      | 1.0       | 4         | 4         | 0.43      | 0:12:53  | 0.48 | y          | y      |
| 1246 | Soest                   | 2000      | 1.048           | 1.34      | 1.0       | 4         | 4         | 0.39      | 0:03:51  | 0.0  | y          | y      |
| 1247 | Dortmund                | 2000      | 1.068           | 1.34      | 1.0       | 4         | 4         | 0.41      | 0:16:10  | 0.0  | y          | y      |
| 1248 | Kassel                  | 2000      | 1.059           | 1.34      | 1.0       | 4         | 4         | 0.47      | 0:01:10  | 0.0  | y          | y      |
| 1249 | Hannover                | 2000      | 1.105           | 1.34      | 1.0       | 4         | 4         | 0.47      | 0:04:49  | 0.0  | y          | y      |
| 1250 | Krefeld                 | 2000      | 1.083           | 1.34      | 1.0       | 4         | 4         | 0.39      | 0:10:00  | 0.0  | y          | y      |
| 1251 | Münster                 | 2000      | 1.065           | 1.34      | 1.0       | 4         | 4         | 0.5       | 0:05:44  | 0.0  | y          | y      |
| 1252 | Paderborn               | 2000      | 1.049           | 1.34      | 1.0       | 4         | 4         | 0.44      | 0:28:04  | 0.16 | y          | y      |
| 1253 | Detmold                 | 2000      | 1.058           | 1.34      | 1.0       | 4         | 4         | 0.46      | 3:21:34  | 0.3  | y          | y      |
| 1254 | Bielefeld               | 2000      | 1.044           | 1.34      | 1.0       | 4         | 4         | 0.44      | 0:05:44  | 0.0  | y          | y      |
| 1255 | Gütersloh               | 2000      | 1.060           | 1.34      | 1.0       | 4         | 4         | 0.44      | 0:02:06  | 0.0  | y          | y      |
| 1256 | Soest                   | 2000      | 1.048           | 1.34      | 1.0       | 4         | 4         | 0.44      | 6:03:31  | 0.36 | y          | y      |
| 1257 | Dortmund                | 2000      | 1.067           | 1.34      | 1.0       | 4         | 4         | 0.44      | 48:00:00 | 1.28 | y          | y      |
| 1258 | Kassel                  | 2000      | 1.060           | 1.34      | 1.0       | 4         | 4         | 0.5       | 0:05:14  | 0.0  | y          | y      |
| 1259 | Hannover                | 2000      | 1.105           | 1.34      | 1.0       | 4         | 4         | 0.42      | *        | *    | *          | *      |
| 1260 | Krefeld                 | 2000      | 1.083           | 1.34      | 1.0       | 4         | 4         | 0.46      | 0:08:15  | 0.0  | y          | y      |
| 1261 | Münster                 | 2000      | 1.065           | 1.0       | 1.0       | 2         | 2         | 0.34      | 0:01:01  | 0.0  | y          | y      |
| 1262 | Paderborn               | 2000      | 1.050           | 1.0       | 1.0       | 2         | 2         | 0.28      | 0:00:57  | 0.0  | y          | y      |
| 1263 | Detmold                 | 2000      | 1.058           | 1.0       | 1.0       | 2         | 2         | 0.27      | 0:07:50  | 0.0  | y          | y      |
| 1264 | Bielefeld               | 2000      | 1.044           | 1.0       | 1.0       | 2         | 2         | 0.31      | 0:00:37  | 0.0  | y          | y      |
| 1265 | Gütersloh               | 2000      | 1.060           | 1.0       | 1.0       | 2         | 2         | 0.32      | 0:02:42  | 0.0  | y          | y      |
| 1266 | Soest                   | 2000      | 1.048           | 1.0       | 1.0       | 2         | 2         | 0.31      | 0:00:28  | 0.0  | y          | y      |
| 1267 | Dortmund                | 2000      | 1.067           | 1.0       | 1.0       | 2         | 2         | 0.32      | 0:01:47  | 0.0  | y          | y      |
| 1268 | Kassel                  | 2000      | 1.060           | 1.0       | 1.0       | 2         | 2         | 0.29      | 0:00:41  | 0.0  | y          | y      |
| 1269 | Hannover                | 2000      | 1.105           | 1.0       | 1.0       | 2         | 2         | 0.26      | 0:01:40  | 0.0  | y          | y      |
| 1270 | Krefeld                 | 2000      | 1.082           | 1.0       | 1.0       | 2         | 2         | 0.35      | 0:01:15  | 0.0  | y          | y      |
| 1271 | Münster                 | 2000      | 1.065           | 1.0       | 1.0       | 2         | 2         | 0.36      | 0:02:23  | 0.0  | y          | y      |
| 1272 | Paderborn               | 2000      | 1.049           | 1.0       | 1.0       | 2         | 2         | 0.34      | 1:37:13  | 0.39 | y          | y      |
| 1273 | Detmold                 | 2000      | 1.058           | 1.0       | 1.0       | 2         | 2         | 0.39      | 0:05:59  | 0.0  | y          | y      |
| 1274 | Bielefeld               | 2000      | 1.044           | 1.0       | 1.0       | 2         | 2         | 0.36      | 0:01:25  | 0.0  | y          | y      |
| 1275 | Gütersloh               | 2000      | 1.060           | 1.0       | 1.0       | 2         | 2         | 0.37      | 0:01:50  | 0.0  | y          | y      |
| 1276 | Soest                   | 2000      | 1.048           | 1.0       | 1.0       | 2         | 2         | 0.34      | 0:02:13  | 0.0  | y          | y      |
| 1277 | Dortmund                | 2000      | 1.067           | 1.0       | 1.0       | 2         | 2         | 0.37      | 0:01:19  | 0.0  | y          | y      |
| 1278 | Kassel                  | 2000      | 1.060           | 1.0       | 1.0       | 2         | 2         | 0.36      | 0:01:11  | 0.0  | y          | y      |
| 1279 | Hannover                | 2000      | 1.105           | 1.0       | 1.0       | 2         | 2         | 0.32      | 0:03:33  | 0.0  | y          | y      |
| 1280 | Krefeld                 | 2000      | 1.083           | 1.0       | 1.0       | 2         | 2         | 0.37      | 0:06:11  | 0.0  | y          | y      |
| 1281 | Münster                 | 2000      | 1.065           | 1.0       | 1.0       | 2         | 2         | 0.43      | 1:09:52  | 0.0  | y          | y      |
| 1282 | Paderborn               | 2000      | 1.049           | 1.0       | 1.0       | 2         | 2         | 0.39      | 0:03:53  | 0.0  | y          | y      |
| 1283 | Detmold                 | 2000      | 1.058           | 1.0       | 1.0       | 2         | 2         | 0.42      | 0:03:30  | 0.0  | y          | y      |
| 1284 | Bielefeld               | 2000      | 1.044           | 1.0       | 1.0       | 2         | 2         | 0.4       | 0:02:24  | 0.0  | y          | y      |
| 1285 | Gütersloh               | 2000      | 1.060           | 1.0       | 1.0       | 2         | 2         | 0.39      | 0:01:47  | 0.0  | y          | y      |

| #    | Network characteristics |           |                 |           |           |           |           |           | Solution |      | Simulation |        |
|------|-------------------------|-----------|-----------------|-----------|-----------|-----------|-----------|-----------|----------|------|------------|--------|
|      | <i>cn</i>               | <i>bu</i> | $\frac{nl}{bu}$ | <i>lf</i> | <i>tr</i> | <i>lt</i> | <i>tt</i> | <i>as</i> | Time     | Gap  | Volt       | Ampere |
| 1286 | Soest                   | 2000      | 1.048           | 1.0       | 1.0       | 2         | 2         | 0.4       | 0:49:22  | 0.2  | y          | y      |
| 1287 | Dortmund                | 2000      | 1.067           | 1.0       | 1.0       | 2         | 2         | 0.43      | 0:06:12  | 0.0  | y          | y      |
| 1288 | Kassel                  | 2000      | 1.060           | 1.0       | 1.0       | 2         | 2         | 0.45      | 0:02:33  | 0.0  | y          | y      |
| 1289 | Hannover                | 2000      | 1.105           | 1.0       | 1.0       | 2         | 2         | 0.38      | *        | *    | *          | *      |
| 1290 | Krefeld                 | 2000      | 1.083           | 1.0       | 1.0       | 2         | 2         | 0.41      | 0:01:52  | 0.0  | y          | y      |
| 1291 | Münster                 | 2000      | 1.063           | 1.0       | 1.0       | 3         | 3         | 0.32      | 0:04:08  | 0.0  | y          | y      |
| 1292 | Paderborn               | 2000      | 1.049           | 1.0       | 1.0       | 3         | 3         | 0.31      | 0:00:37  | 0.0  | y          | y      |
| 1293 | Detmold                 | 2000      | 1.058           | 1.0       | 1.0       | 3         | 3         | 0.3       | 0:05:19  | 0.0  | y          | y      |
| 1294 | Bielefeld               | 2000      | 1.044           | 1.0       | 1.0       | 3         | 3         | 0.34      | 0:00:50  | 0.0  | y          | y      |
| 1295 | Gütersloh               | 2000      | 1.059           | 1.0       | 1.0       | 3         | 3         | 0.32      | 0:03:56  | 0.0  | y          | y      |
| 1296 | Soest                   | 2000      | 1.048           | 1.0       | 1.0       | 3         | 3         | 0.34      | 0:00:42  | 0.0  | y          | y      |
| 1297 | Dortmund                | 2000      | 1.067           | 1.0       | 1.0       | 3         | 3         | 0.38      | 0:02:05  | 0.0  | y          | y      |
| 1298 | Kassel                  | 2000      | 1.060           | 1.0       | 1.0       | 3         | 3         | 0.33      | 0:00:44  | 0.0  | y          | y      |
| 1299 | Hannover                | 2000      | 1.105           | 1.0       | 1.0       | 3         | 3         | 0.42      | 0:01:33  | 0.0  | y          | y      |
| 1300 | Krefeld                 | 2000      | 1.083           | 1.0       | 1.0       | 3         | 3         | 0.4       | 0:08:59  | 0.0  | y          | y      |
| 1301 | Münster                 | 2000      | 1.065           | 1.0       | 1.0       | 3         | 3         | 0.39      | 0:03:16  | 0.0  | y          | y      |
| 1302 | Paderborn               | 2000      | 1.049           | 1.0       | 1.0       | 3         | 3         | 0.36      | 1:14:52  | 0.0  | y          | y      |
| 1303 | Detmold                 | 2000      | 1.058           | 1.0       | 1.0       | 3         | 3         | 0.37      | 0:03:48  | 0.0  | y          | y      |
| 1304 | Bielefeld               | 2000      | 1.044           | 1.0       | 1.0       | 3         | 3         | 0.38      | 0:01:32  | 0.0  | y          | y      |
| 1305 | Gütersloh               | 2000      | 1.060           | 1.0       | 1.0       | 3         | 3         | 0.4       | 0:03:44  | 0.0  | y          | y      |
| 1306 | Soest                   | 2000      | 1.048           | 1.0       | 1.0       | 3         | 3         | 0.37      | 0:05:57  | 0.0  | y          | y      |
| 1307 | Dortmund                | 2000      | 1.067           | 1.0       | 1.0       | 3         | 3         | 0.32      | 2:59:21  | 0.28 | y          | y      |
| 1308 | Kassel                  | 2000      | 1.059           | 1.0       | 1.0       | 3         | 3         | 0.44      | 0:01:23  | 0.0  | y          | y      |
| 1309 | Hannover                | 2000      | 1.105           | 1.0       | 1.0       | 3         | 3         | 0.35      | 0:04:11  | 0.0  | y          | y      |
| 1310 | Krefeld                 | 2000      | 1.083           | 1.0       | 1.0       | 3         | 3         | 0.4       | 0:08:01  | 0.0  | y          | y      |
| 1311 | Münster                 | 2000      | 1.065           | 1.0       | 1.0       | 3         | 3         | 0.46      | 1:02:44  | 0.0  | y          | y      |
| 1312 | Paderborn               | 2000      | 1.049           | 1.0       | 1.0       | 3         | 3         | 0.41      | 0:19:08  | 0.0  | y          | y      |
| 1313 | Detmold                 | 2000      | 1.058           | 1.0       | 1.0       | 3         | 3         | 0.44      | 0:49:26  | 0.17 | y          | y      |
| 1314 | Bielefeld               | 2000      | 1.044           | 1.0       | 1.0       | 3         | 3         | 0.42      | 0:02:23  | 0.0  | y          | y      |
| 1315 | Gütersloh               | 2000      | 1.060           | 1.0       | 1.0       | 3         | 3         | 0.42      | 0:03:49  | 0.0  | y          | y      |
| 1316 | Soest                   | 2000      | 1.048           | 1.0       | 1.0       | 3         | 3         | 0.42      | 8:55:38  | 0.47 | y          | y      |
| 1317 | Dortmund                | 2000      | 1.067           | 1.0       | 1.0       | 3         | 3         | 0.44      | 0:08:43  | 0.0  | y          | y      |
| 1318 | Kassel                  | 2000      | 1.060           | 1.0       | 1.0       | 3         | 3         | 0.47      | 0:04:46  | 0.0  | y          | y      |
| 1319 | Hannover                | 2000      | 1.105           | 1.0       | 1.0       | 3         | 3         | 0.4       | *        | *    | *          | *      |
| 1320 | Krefeld                 | 2000      | 1.083           | 1.0       | 1.0       | 3         | 3         | 0.44      | 0:06:14  | 0.0  | y          | y      |
| 1321 | Münster                 | 2000      | 1.063           | 1.0       | 1.0       | 4         | 4         | 0.31      | 0:01:31  | 0.0  | y          | y      |
| 1322 | Paderborn               | 2000      | 1.049           | 1.0       | 1.0       | 4         | 4         | 0.32      | 0:01:08  | 0.0  | y          | y      |
| 1323 | Detmold                 | 2000      | 1.059           | 1.0       | 1.0       | 4         | 4         | 0.39      | 0:01:13  | 0.0  | y          | y      |
| 1324 | Bielefeld               | 2000      | 1.044           | 1.0       | 1.0       | 4         | 4         | 0.37      | 0:01:12  | 0.0  | y          | y      |
| 1325 | Gütersloh               | 2000      | 1.060           | 1.0       | 1.0       | 4         | 4         | 0.38      | 0:01:59  | 0.0  | y          | y      |
| 1326 | Soest                   | 2000      | 1.048           | 1.0       | 1.0       | 4         | 4         | 0.37      | 0:00:45  | 0.0  | y          | y      |
| 1327 | Dortmund                | 2000      | 1.067           | 1.0       | 1.0       | 4         | 4         | 0.41      | 0:04:26  | 0.0  | y          | y      |
| 1328 | Kassel                  | 2000      | 1.060           | 1.0       | 1.0       | 4         | 4         | 0.35      | 0:01:03  | 0.0  | y          | y      |
| 1329 | Hannover                | 2000      | 1.105           | 1.0       | 1.0       | 4         | 4         | 0.45      | 0:01:13  | 0.0  | y          | y      |
| 1330 | Krefeld                 | 2000      | 1.083           | 1.0       | 1.0       | 4         | 4         | 0.46      | 0:03:35  | 0.0  | y          | y      |
| 1331 | Münster                 | 2000      | 1.065           | 1.0       | 1.0       | 4         | 4         | 0.41      | 0:04:30  | 0.0  | y          | y      |
| 1332 | Paderborn               | 2000      | 1.049           | 1.0       | 1.0       | 4         | 4         | 0.38      | 5:40:49  | 0.0  | y          | y      |
| 1333 | Detmold                 | 2000      | 1.058           | 1.0       | 1.0       | 4         | 4         | 0.39      | 0:14:34  | 0.0  | y          | y      |
| 1334 | Bielefeld               | 2000      | 1.044           | 1.0       | 1.0       | 4         | 4         | 0.41      | 0:03:56  | 0.0  | y          | y      |
| 1335 | Gütersloh               | 2000      | 1.059           | 1.0       | 1.0       | 4         | 4         | 0.43      | 0:59:02  | 0.0  | y          | y      |
| 1336 | Soest                   | 2000      | 1.048           | 1.0       | 1.0       | 4         | 4         | 0.39      | 0:01:51  | 0.0  | y          | y      |
| 1337 | Dortmund                | 2000      | 1.067           | 1.0       | 1.0       | 4         | 4         | 0.34      | 4:07:27  | 0.0  | y          | y      |

| #    | Network characteristics |           |                  |           |           |           |           | Solution  |         | Simulation |      |        |
|------|-------------------------|-----------|------------------|-----------|-----------|-----------|-----------|-----------|---------|------------|------|--------|
|      | <i>cn</i>               | <i>bu</i> | $\frac{n_l}{bu}$ | <i>lf</i> | <i>tr</i> | <i>lt</i> | <i>tt</i> | <i>as</i> | Time    | Gap        | Volt | Ampere |
| 1338 | Kassel                  | 2000      | 1.059            | 1.0       | 1.0       | 4         | 4         | 0.47      | 0:01:30 | 0.0        | y    | y      |
| 1339 | Hannover                | 2000      | 1.105            | 1.0       | 1.0       | 4         | 4         | 0.37      | 0:05:22 | 0.0        | y    | y      |
| 1340 | Krefeld                 | 2000      | 1.083            | 1.0       | 1.0       | 4         | 4         | 0.43      | 0:02:45 | 0.0        | y    | y      |
| 1341 | Münster                 | 2000      | 1.065            | 1.0       | 1.0       | 4         | 4         | 0.48      | 0:20:32 | 0.0        | y    | y      |
| 1342 | Paderborn               | 2000      | 1.049            | 1.0       | 1.0       | 4         | 4         | 0.43      | 0:02:34 | 0.0        | y    | y      |
| 1343 | Detmold                 | 2000      | 1.058            | 1.0       | 1.0       | 4         | 4         | 0.46      | 0:40:56 | 0.15       | y    | y      |
| 1344 | Bielefeld               | 2000      | 1.044            | 1.0       | 1.0       | 4         | 4         | 0.44      | 0:04:50 | 0.0        | y    | y      |
| 1345 | Gütersloh               | 2000      | 1.060            | 1.0       | 1.0       | 4         | 4         | 0.44      | 0:01:38 | 0.0        | y    | y      |
| 1346 | Soest                   | 2000      | 1.048            | 1.0       | 1.0       | 4         | 4         | 0.49      | 0:09:17 | 0.0        | y    | y      |
| 1347 | Dortmund                | 2000      | 1.067            | 1.0       | 1.0       | 4         | 4         | 0.46      | 0:05:52 | 0.24       | y    | y      |
| 1348 | Kassel                  | 2000      | 1.059            | 1.0       | 1.0       | 4         | 4         | 0.51      | 0:02:35 | 0.0        | y    | y      |
| 1349 | Hannover                | 2000      | 1.105            | 1.0       | 1.0       | 4         | 4         | 0.47      | 0:05:32 | 0.0        | y    | y      |
| 1350 | Krefeld                 | 2000      | 1.082            | 1.0       | 1.0       | 4         | 4         | 0.45      | 0:05:38 | 0.0        | y    | y      |
| 1351 | Münster                 | 2000      | 1.066            | 0.83      | 1.25      | 2         | 2         | 0.31      | 0:01:16 | 0.0        | y    | y      |
| 1352 | Paderborn               | 2000      | 1.050            | 0.83      | 1.25      | 2         | 2         | 0.29      | 0:00:55 | 0.0        | y    | y      |
| 1353 | Detmold                 | 2000      | 1.060            | 0.83      | 1.25      | 2         | 2         | 0.63      | 0:02:27 | 0.0        | y    | y      |
| 1354 | Bielefeld               | 2000      | 1.047            | 0.83      | 1.25      | 2         | 2         | 0.3       | 0:00:54 | 0.0        | y    | y      |
| 1355 | Gütersloh               | 2000      | 1.060            | 0.83      | 1.25      | 2         | 2         | 0.26      | 0:01:03 | 0.0        | y    | y      |
| 1356 | Soest                   | 2000      | 1.050            | 0.83      | 1.25      | 2         | 2         | 0.27      | 0:01:15 | 0.0        | y    | y      |
| 1357 | Dortmund                | 2000      | 1.069            | 0.83      | 1.25      | 2         | 2         | 0.29      | 0:03:23 | 0.0        | y    | y      |
| 1358 | Kassel                  | 2000      | 1.062            | 0.83      | 1.25      | 2         | 2         | 0.27      | 0:01:01 | 0.0        | y    | y      |
| 1359 | Hannover                | 2000      | 1.107            | 0.83      | 1.25      | 2         | 2         | 0.24      | 0:06:08 | 0.0        | y    | y      |
| 1360 | Krefeld                 | 2000      | 1.084            | 0.83      | 1.25      | 2         | 2         | 0.37      | 0:05:18 | 0.0        | y    | y      |
| 1361 | Münster                 | 2000      | 1.066            | 0.83      | 1.25      | 2         | 2         | 0.32      | 0:05:33 | 0.0        | y    | y      |
| 1362 | Paderborn               | 2000      | 1.050            | 0.83      | 1.25      | 2         | 2         | 0.33      | 0:04:10 | 0.0        | y    | y      |
| 1363 | Detmold                 | 2000      | 1.060            | 0.83      | 1.25      | 2         | 2         | 0.33      | 0:01:52 | 0.0        | y    | y      |
| 1364 | Bielefeld               | 2000      | 1.047            | 0.83      | 1.25      | 2         | 2         | 0.3       | 0:01:54 | 0.0        | y    | y      |
| 1365 | Gütersloh               | 2000      | 1.060            | 0.83      | 1.25      | 2         | 2         | 0.3       | 0:06:44 | 0.0        | y    | y      |
| 1366 | Soest                   | 2000      | 1.050            | 0.83      | 1.25      | 2         | 2         | 0.32      | 0:01:02 | 0.0        | y    | y      |
| 1367 | Dortmund                | 2000      | 1.069            | 0.83      | 1.25      | 2         | 2         | 0.32      | 0:01:38 | 0.0        | y    | y      |
| 1368 | Kassel                  | 2000      | 1.062            | 0.83      | 1.25      | 2         | 2         | 0.35      | 0:02:14 | 0.0        | y    | y      |
| 1369 | Hannover                | 2000      | 1.107            | 0.83      | 1.25      | 2         | 2         | 0.34      | 0:05:07 | 0.0        | y    | y      |
| 1370 | Krefeld                 | 2000      | 1.083            | 0.83      | 1.25      | 2         | 2         | 0.32      | 0:09:42 | 0.0        | y    | y      |
| 1371 | Münster                 | 2000      | 1.066            | 0.83      | 1.25      | 2         | 2         | 0.39      | 0:07:43 | 0.0        | y    | y      |
| 1372 | Paderborn               | 2000      | 1.050            | 0.83      | 1.25      | 2         | 2         | 0.39      | 0:02:42 | 0.0        | y    | y      |
| 1373 | Detmold                 | 2000      | 1.060            | 0.83      | 1.25      | 2         | 2         | 0.39      | 0:05:11 | 0.0        | y    | y      |
| 1374 | Bielefeld               | 2000      | 1.046            | 0.83      | 1.25      | 2         | 2         | 0.42      | 0:06:16 | 0.0        | y    | y      |
| 1375 | Gütersloh               | 2000      | 1.061            | 0.83      | 1.25      | 2         | 2         | 0.39      | 0:07:44 | 0.0        | y    | y      |
| 1376 | Soest                   | 2000      | 1.050            | 0.83      | 1.25      | 2         | 2         | 0.39      | 0:01:52 | 0.0        | y    | y      |
| 1377 | Dortmund                | 2000      | 1.069            | 0.83      | 1.25      | 2         | 2         | 0.4       | 0:07:37 | 0.23       | y    | y      |
| 1378 | Kassel                  | 2000      | 1.061            | 0.83      | 1.25      | 2         | 2         | 0.39      | 0:01:31 | 0.0        | y    | y      |
| 1379 | Hannover                | 2000      | 1.107            | 0.83      | 1.25      | 2         | 2         | 0.36      | 0:12:36 | 0.0        | y    | y      |
| 1380 | Krefeld                 | 2000      | 1.083            | 0.83      | 1.25      | 2         | 2         | 0.39      | 0:06:41 | 0.0        | y    | y      |
| 1381 | Münster                 | 2000      | 1.066            | 0.83      | 1.25      | 3         | 3         | 0.43      | 0:01:03 | 0.0        | y    | y      |
| 1382 | Paderborn               | 2000      | 1.050            | 0.83      | 1.25      | 3         | 3         | 0.32      | 0:01:29 | 0.0        | y    | y      |
| 1383 | Detmold                 | 2000      | 1.062            | 0.83      | 1.25      | 3         | 3         | 0.37      | 0:06:34 | 0.0        | y    | y      |
| 1384 | Bielefeld               | 2000      | 1.047            | 0.83      | 1.25      | 3         | 3         | 0.33      | 0:01:55 | 0.0        | y    | y      |
| 1385 | Gütersloh               | 2000      | 1.061            | 0.83      | 1.25      | 3         | 3         | 0.29      | 0:01:27 | 0.0        | y    | y      |
| 1386 | Soest                   | 2000      | 1.050            | 0.83      | 1.25      | 3         | 3         | 0.3       | 0:00:51 | 0.0        | y    | y      |
| 1387 | Dortmund                | 2000      | 1.069            | 0.83      | 1.25      | 3         | 3         | 0.32      | 0:01:32 | 0.0        | y    | y      |
| 1388 | Kassel                  | 2000      | 1.062            | 0.83      | 1.25      | 3         | 3         | 0.3       | 0:01:09 | 0.0        | y    | y      |
| 1389 | Hannover                | 2000      | 1.107            | 0.83      | 1.25      | 3         | 3         | 0.27      | 0:03:58 | 0.0        | y    | y      |

| #    | Network characteristics |           |                 |           |           |           |           |           | Solution |      | Simulation |        |
|------|-------------------------|-----------|-----------------|-----------|-----------|-----------|-----------|-----------|----------|------|------------|--------|
|      | <i>cn</i>               | <i>bu</i> | $\frac{nl}{bu}$ | <i>lf</i> | <i>tr</i> | <i>lt</i> | <i>tt</i> | <i>as</i> | Time     | Gap  | Volt       | Ampere |
| 1390 | Krefeld                 | 2000      | 1.083           | 0.83      | 1.25      | 3         | 3         | 0.3       | 0:01:25  | 0.0  | y          | y      |
| 1391 | Münster                 | 2000      | 1.066           | 0.83      | 1.25      | 3         | 3         | 0.35      | 0:01:54  | 0.0  | y          | y      |
| 1392 | Paderborn               | 2000      | 1.050           | 0.83      | 1.25      | 3         | 3         | 0.38      | 0:03:25  | 0.0  | y          | y      |
| 1393 | Detmold                 | 2000      | 1.060           | 0.83      | 1.25      | 3         | 3         | 0.42      | 0:05:14  | 0.0  | y          | y      |
| 1394 | Bielefeld               | 2000      | 1.047           | 0.83      | 1.25      | 3         | 3         | 0.32      | 0:11:09  | 0.26 | y          | y      |
| 1395 | Gütersloh               | 2000      | 1.061           | 0.83      | 1.25      | 3         | 3         | 0.32      | 0:12:11  | 0.0  | y          | y      |
| 1396 | Soest                   | 2000      | 1.050           | 0.83      | 1.25      | 3         | 3         | 0.34      | 0:02:47  | 0.0  | y          | y      |
| 1397 | Dortmund                | 2000      | 1.069           | 0.83      | 1.25      | 3         | 3         | 0.35      | 0:07:24  | 0.0  | y          | y      |
| 1398 | Kassel                  | 2000      | 1.062           | 0.83      | 1.25      | 3         | 3         | 0.38      | 0:02:43  | 0.0  | y          | y      |
| 1399 | Hannover                | 2000      | 1.107           | 0.83      | 1.25      | 3         | 3         | 0.36      | 0:14:19  | 0.0  | y          | y      |
| 1400 | Krefeld                 | 2000      | 1.083           | 0.83      | 1.25      | 3         | 3         | 0.36      | 0:12:38  | 0.0  | y          | y      |
| 1401 | Münster                 | 2000      | 1.066           | 0.83      | 1.25      | 3         | 3         | 0.43      | 0:02:56  | 0.0  | y          | y      |
| 1402 | Paderborn               | 2000      | 1.050           | 0.83      | 1.25      | 3         | 3         | 0.43      | 0:08:23  | 0.0  | n          | y      |
| 1403 | Detmold                 | 2000      | 1.060           | 0.83      | 1.25      | 3         | 3         | 0.42      | 0:02:15  | 0.0  | y          | y      |
| 1404 | Bielefeld               | 2000      | 1.047           | 0.83      | 1.25      | 3         | 3         | 0.39      | 0:04:15  | 0.0  | y          | y      |
| 1405 | Gütersloh               | 2000      | 1.060           | 0.83      | 1.25      | 3         | 3         | 0.4       | 0:02:31  | 0.0  | y          | y      |
| 1406 | Soest                   | 2000      | 1.050           | 0.83      | 1.25      | 3         | 3         | 0.41      | 0:04:19  | 0.0  | y          | y      |
| 1407 | Dortmund                | 2000      | 1.069           | 0.83      | 1.25      | 3         | 3         | 0.42      | 0:17:35  | 0.0  | y          | y      |
| 1408 | Kassel                  | 2000      | 1.061           | 0.83      | 1.25      | 3         | 3         | 0.41      | 0:04:07  | 0.0  | y          | y      |
| 1409 | Hannover                | 2000      | 1.107           | 0.83      | 1.25      | 3         | 3         | 0.38      | 0:16:36  | 0.0  | y          | y      |
| 1410 | Krefeld                 | 2000      | 1.084           | 0.83      | 1.25      | 3         | 3         | 0.41      | 0:26:28  | 0.0  | y          | y      |
| 1411 | Münster                 | 2000      | 1.066           | 0.83      | 1.25      | 4         | 4         | 0.41      | 0:01:49  | 0.0  | y          | y      |
| 1412 | Paderborn               | 2000      | 1.050           | 0.83      | 1.25      | 4         | 4         | 0.35      | 0:01:11  | 0.0  | y          | y      |
| 1413 | Detmold                 | 2000      | 1.060           | 0.83      | 1.25      | 4         | 4         | 0.63      | 0:03:29  | 0.0  | y          | y      |
| 1414 | Bielefeld               | 2000      | 1.047           | 0.83      | 1.25      | 4         | 4         | 0.35      | 0:02:21  | 0.0  | y          | y      |
| 1415 | Gütersloh               | 2000      | 1.060           | 0.83      | 1.25      | 4         | 4         | 0.32      | 0:01:17  | 0.0  | y          | y      |
| 1416 | Soest                   | 2000      | 1.050           | 0.83      | 1.25      | 4         | 4         | 0.33      | 0:02:00  | 0.0  | y          | y      |
| 1417 | Dortmund                | 2000      | 1.069           | 0.83      | 1.25      | 4         | 4         | 0.34      | 0:01:37  | 0.0  | y          | y      |
| 1418 | Kassel                  | 2000      | 1.062           | 0.83      | 1.25      | 4         | 4         | 0.32      | 0:01:28  | 0.0  | y          | y      |
| 1419 | Hannover                | 2000      | 1.107           | 0.83      | 1.25      | 4         | 4         | 0.3       | 0:02:36  | 0.0  | y          | y      |
| 1420 | Krefeld                 | 2000      | 1.084           | 0.83      | 1.25      | 4         | 4         | 0.43      | 0:01:47  | 0.0  | y          | y      |
| 1421 | Münster                 | 2000      | 1.066           | 0.83      | 1.25      | 4         | 4         | 0.37      | 0:02:11  | 0.0  | y          | y      |
| 1422 | Paderborn               | 2000      | 1.050           | 0.83      | 1.25      | 4         | 4         | 0.4       | 0:02:40  | 0.0  | y          | y      |
| 1423 | Detmold                 | 2000      | 1.060           | 0.83      | 1.25      | 4         | 4         | 0.45      | 0:06:29  | 0.0  | y          | y      |
| 1424 | Bielefeld               | 2000      | 1.047           | 0.83      | 1.25      | 4         | 4         | 0.34      | 0:02:29  | 0.0  | y          | y      |
| 1425 | Gütersloh               | 2000      | 1.060           | 0.83      | 1.25      | 4         | 4         | 0.35      | 0:03:33  | 0.0  | y          | y      |
| 1426 | Soest                   | 2000      | 1.050           | 0.83      | 1.25      | 4         | 4         | 0.36      | 0:03:43  | 0.0  | y          | y      |
| 1427 | Dortmund                | 2000      | 1.069           | 0.83      | 1.25      | 4         | 4         | 0.37      | 0:10:51  | 0.0  | y          | y      |
| 1428 | Kassel                  | 2000      | 1.062           | 0.83      | 1.25      | 4         | 4         | 0.41      | 0:03:43  | 0.0  | y          | y      |
| 1429 | Hannover                | 2000      | 1.107           | 0.83      | 1.25      | 4         | 4         | 0.38      | 0:14:37  | 0.0  | y          | y      |
| 1430 | Krefeld                 | 2000      | 1.083           | 0.83      | 1.25      | 4         | 4         | 0.36      | 0:06:15  | 0.0  | y          | y      |
| 1431 | Münster                 | 2000      | 1.066           | 0.83      | 1.25      | 4         | 4         | 0.43      | 0:05:50  | 0.0  | y          | y      |
| 1432 | Paderborn               | 2000      | 1.050           | 0.83      | 1.25      | 4         | 4         | 0.45      | 0:06:11  | 0.15 | n          | y      |
| 1433 | Detmold                 | 2000      | 1.060           | 0.83      | 1.25      | 4         | 4         | 0.42      | 0:05:56  | 0.0  | y          | y      |
| 1434 | Bielefeld               | 2000      | 1.047           | 0.83      | 1.25      | 4         | 4         | 0.41      | 0:07:24  | 0.0  | y          | y      |
| 1435 | Gütersloh               | 2000      | 1.061           | 0.83      | 1.25      | 4         | 4         | 0.44      | 0:02:28  | 0.0  | y          | y      |
| 1436 | Soest                   | 2000      | 1.048           | 0.83      | 1.25      | 4         | 4         | 0.44      | 0:07:12  | 0.0  | y          | y      |
| 1437 | Dortmund                | 2000      | 1.069           | 0.83      | 1.25      | 4         | 4         | 0.44      | 0:06:18  | 0.0  | y          | y      |
| 1438 | Kassel                  | 2000      | 1.062           | 0.83      | 1.25      | 4         | 4         | 0.43      | 0:03:23  | 0.0  | y          | y      |
| 1439 | Hannover                | 2000      | 1.107           | 0.83      | 1.25      | 4         | 4         | 0.4       | 0:23:14  | 0.0  | y          | y      |
| 1440 | Krefeld                 | 2000      | 1.084           | 0.83      | 1.25      | 4         | 4         | 0.43      | 0:31:20  | 0.44 | y          | y      |
| 1441 | Münster                 | 2000      | 1.066           | 1.34      | 1.25      | 2         | 2         | 0.39      | 0:01:08  | 0.0  | y          | y      |

| #    | Network characteristics |           |                 |           |           |           |           | Solution  |         | Simulation |      |        |
|------|-------------------------|-----------|-----------------|-----------|-----------|-----------|-----------|-----------|---------|------------|------|--------|
|      | <i>cn</i>               | <i>bu</i> | $\frac{nI}{bu}$ | <i>lf</i> | <i>tr</i> | <i>lt</i> | <i>tt</i> | <i>as</i> | Time    | Gap        | Volt | Ampere |
| 1442 | Paderborn               | 2000      | 1.050           | 1.34      | 1.25      | 2         | 2         | 0.29      | 0:00:50 | 0.0        | y    | y      |
| 1443 | Detmold                 | 2000      | 1.060           | 1.34      | 1.25      | 2         | 2         | 0.63      | 0:02:30 | 0.0        | y    | y      |
| 1444 | Bielefeld               | 2000      | 1.047           | 1.34      | 1.25      | 2         | 2         | 0.3       | 0:01:27 | 0.0        | y    | y      |
| 1445 | Gütersloh               | 2000      | 1.061           | 1.34      | 1.25      | 2         | 2         | 0.27      | 0:02:26 | 0.0        | y    | y      |
| 1446 | Soest                   | 2000      | 1.050           | 1.34      | 1.25      | 2         | 2         | 0.27      | 0:01:03 | 0.0        | y    | y      |
| 1447 | Dortmund                | 2000      | 1.069           | 1.34      | 1.25      | 2         | 2         | 0.29      | 0:01:29 | 0.0        | y    | y      |
| 1448 | Kassel                  | 2000      | 1.062           | 1.34      | 1.25      | 2         | 2         | 0.36      | 0:01:02 | 0.0        | y    | y      |
| 1449 | Hannover                | 2000      | 1.107           | 1.34      | 1.25      | 2         | 2         | 0.24      | 0:01:56 | 0.0        | y    | y      |
| 1450 | Krefeld                 | 2000      | 1.083           | 1.34      | 1.25      | 2         | 2         | 0.28      | 0:01:23 | 0.0        | y    | y      |
| 1451 | Münster                 | 2000      | 1.066           | 1.34      | 1.25      | 2         | 2         | 0.32      | 0:01:11 | 0.0        | y    | y      |
| 1452 | Paderborn               | 2000      | 1.050           | 1.34      | 1.25      | 2         | 2         | 0.35      | 0:05:12 | 0.0        | y    | y      |
| 1453 | Detmold                 | 2000      | 1.060           | 1.34      | 1.25      | 2         | 2         | 0.39      | 0:02:19 | 0.0        | y    | y      |
| 1454 | Bielefeld               | 2000      | 1.047           | 1.34      | 1.25      | 2         | 2         | 0.3       | 0:01:48 | 0.26       | y    | y      |
| 1455 | Gütersloh               | 2000      | 1.060           | 1.34      | 1.25      | 2         | 2         | 0.3       | 0:02:36 | 0.0        | y    | y      |
| 1456 | Soest                   | 2000      | 1.050           | 1.34      | 1.25      | 2         | 2         | 0.32      | 0:01:32 | 0.0        | y    | y      |
| 1457 | Dortmund                | 2000      | 1.069           | 1.34      | 1.25      | 2         | 2         | 0.32      | 0:02:23 | 0.0        | y    | y      |
| 1458 | Kassel                  | 2000      | 1.062           | 1.34      | 1.25      | 2         | 2         | 0.35      | 0:02:37 | 0.0        | y    | y      |
| 1459 | Hannover                | 2000      | 1.107           | 1.34      | 1.25      | 2         | 2         | 0.34      | 0:06:32 | 0.0        | y    | y      |
| 1460 | Krefeld                 | 2000      | 1.083           | 1.34      | 1.25      | 2         | 2         | 0.32      | 0:02:38 | 0.0        | y    | y      |
| 1461 | Münster                 | 2000      | 1.066           | 1.34      | 1.25      | 2         | 2         | 0.4       | 0:08:07 | 0.0        | y    | y      |
| 1462 | Paderborn               | 2000      | 1.050           | 1.34      | 1.25      | 2         | 2         | 0.41      | 0:32:23 | 0.07       | n    | y      |
| 1463 | Detmold                 | 2000      | 1.060           | 1.34      | 1.25      | 2         | 2         | 0.4       | 0:04:23 | 0.43       | y    | y      |
| 1464 | Bielefeld               | 2000      | 1.047           | 1.34      | 1.25      | 2         | 2         | 0.37      | 0:03:33 | 0.0        | y    | y      |
| 1465 | Gütersloh               | 2000      | 1.060           | 1.34      | 1.25      | 2         | 2         | 0.38      | 0:04:29 | 0.0        | y    | y      |
| 1466 | Soest                   | 2000      | 1.050           | 1.34      | 1.25      | 2         | 2         | 0.39      | 0:03:44 | 0.0        | y    | y      |
| 1467 | Dortmund                | 2000      | 1.069           | 1.34      | 1.25      | 2         | 2         | 0.4       | 0:20:41 | 0.0        | y    | y      |
| 1468 | Kassel                  | 2000      | 1.062           | 1.34      | 1.25      | 2         | 2         | 0.39      | 0:03:48 | 0.0        | y    | y      |
| 1469 | Hannover                | 2000      | 1.107           | 1.34      | 1.25      | 2         | 2         | 0.36      | 0:13:31 | 0.0        | y    | y      |
| 1470 | Krefeld                 | 2000      | 1.083           | 1.34      | 1.25      | 2         | 2         | 0.39      | 0:05:01 | 0.0        | y    | y      |
| 1471 | Münster                 | 2000      | 1.066           | 1.34      | 1.25      | 3         | 3         | 0.35      | 0:01:25 | 0.0        | y    | y      |
| 1472 | Paderborn               | 2000      | 1.050           | 1.34      | 1.25      | 3         | 3         | 0.32      | 0:01:06 | 0.0        | y    | y      |
| 1473 | Detmold                 | 2000      | 1.060           | 1.34      | 1.25      | 3         | 3         | 0.63      | 0:02:29 | 0.0        | y    | y      |
| 1474 | Bielefeld               | 2000      | 1.046           | 1.34      | 1.25      | 3         | 3         | 0.39      | 0:01:42 | 0.0        | y    | y      |
| 1475 | Gütersloh               | 2000      | 1.061           | 1.34      | 1.25      | 3         | 3         | 0.29      | 0:06:23 | 0.0        | y    | y      |
| 1476 | Soest                   | 2000      | 1.050           | 1.34      | 1.25      | 3         | 3         | 0.3       | 0:01:08 | 0.0        | y    | y      |
| 1477 | Dortmund                | 2000      | 1.069           | 1.34      | 1.25      | 3         | 3         | 0.31      | 0:01:49 | 0.0        | y    | y      |
| 1478 | Kassel                  | 2000      | 1.062           | 1.34      | 1.25      | 3         | 3         | 0.3       | 0:03:54 | 0.0        | y    | y      |
| 1479 | Hannover                | 2000      | 1.107           | 1.34      | 1.25      | 3         | 3         | 0.27      | 0:07:01 | 0.0        | y    | y      |
| 1480 | Krefeld                 | 2000      | 1.083           | 1.34      | 1.25      | 3         | 3         | 0.31      | 0:06:36 | 0.0        | y    | y      |
| 1481 | Münster                 | 2000      | 1.066           | 1.34      | 1.25      | 3         | 3         | 0.4       | 0:02:59 | 0.0        | y    | y      |
| 1482 | Paderborn               | 2000      | 1.050           | 1.34      | 1.25      | 3         | 3         | 0.36      | 0:02:32 | 0.0        | y    | y      |
| 1483 | Detmold                 | 2000      | 1.060           | 1.34      | 1.25      | 3         | 3         | 0.42      | 0:04:15 | 0.23       | y    | y      |
| 1484 | Bielefeld               | 2000      | 1.046           | 1.34      | 1.25      | 3         | 3         | 0.38      | 0:02:31 | 0.0        | y    | y      |
| 1485 | Gütersloh               | 2000      | 1.060           | 1.34      | 1.25      | 3         | 3         | 0.33      | 0:05:56 | 0.0        | y    | y      |
| 1486 | Soest                   | 2000      | 1.050           | 1.34      | 1.25      | 3         | 3         | 0.34      | 0:03:33 | 0.0        | y    | y      |
| 1487 | Dortmund                | 2000      | 1.069           | 1.34      | 1.25      | 3         | 3         | 0.35      | 0:05:09 | 0.0        | y    | y      |
| 1488 | Kassel                  | 2000      | 1.062           | 1.34      | 1.25      | 3         | 3         | 0.38      | 0:03:05 | 0.0        | y    | y      |
| 1489 | Hannover                | 2000      | 1.107           | 1.34      | 1.25      | 3         | 3         | 0.36      | 0:06:36 | 0.0        | y    | y      |
| 1490 | Krefeld                 | 2000      | 1.083           | 1.34      | 1.25      | 3         | 3         | 0.34      | 0:23:09 | 0.0        | y    | y      |
| 1491 | Münster                 | 2000      | 1.066           | 1.34      | 1.25      | 3         | 3         | 0.41      | 0:10:35 | 0.0        | y    | y      |
| 1492 | Paderborn               | 2000      | 1.050           | 1.34      | 1.25      | 3         | 3         | 0.43      | 0:40:44 | 0.1        | n    | y      |
| 1493 | Detmold                 | 2000      | 1.060           | 1.34      | 1.25      | 3         | 3         | 0.43      | 1:02:19 | 0.0        | y    | y      |

| #    | <i>cn</i> | Network characteristics |                  |           |           |           |           |           | Solution |      | Simulation |        |
|------|-----------|-------------------------|------------------|-----------|-----------|-----------|-----------|-----------|----------|------|------------|--------|
|      |           | <i>bu</i>               | $\frac{n_l}{bu}$ | <i>lf</i> | <i>tr</i> | <i>lt</i> | <i>tt</i> | <i>as</i> | Time     | Gap  | Volt       | Ampere |
| 1494 | Bielefeld | 2000                    | 1.047            | 1.34      | 1.25      | 3         | 3         | 0.39      | 0:07:02  | 0.0  | y          | y      |
| 1495 | Gütersloh | 2000                    | 1.061            | 1.34      | 1.25      | 3         | 3         | 0.42      | 4:12:20  | 0.0  | y          | y      |
| 1496 | Soest     | 2000                    | 1.050            | 1.34      | 1.25      | 3         | 3         | 0.41      | 0:06:06  | 0.0  | y          | y      |
| 1497 | Dortmund  | 2000                    | 1.069            | 1.34      | 1.25      | 3         | 3         | 0.42      | 0:19:58  | 0.0  | y          | y      |
| 1498 | Kassel    | 2000                    | 1.062            | 1.34      | 1.25      | 3         | 3         | 0.41      | 0:06:31  | 0.0  | y          | y      |
| 1499 | Hannover  | 2000                    | 1.107            | 1.34      | 1.25      | 3         | 3         | 0.38      | 0:18:45  | 0.0  | y          | y      |
| 1500 | Krefeld   | 2000                    | 1.083            | 1.34      | 1.25      | 3         | 3         | 0.41      | 0:14:30  | 0.0  | y          | y      |
| 1501 | Münster   | 2000                    | 1.066            | 1.34      | 1.25      | 4         | 4         | 0.45      | 0:01:22  | 0.0  | y          | y      |
| 1502 | Paderborn | 2000                    | 1.050            | 1.34      | 1.25      | 4         | 4         | 0.35      | 0:01:42  | 0.0  | y          | y      |
| 1503 | Detmold   | 2000                    | 1.060            | 1.34      | 1.25      | 4         | 4         | 0.63      | 0:02:37  | 0.0  | y          | y      |
| 1504 | Bielefeld | 2000                    | 1.046            | 1.34      | 1.25      | 4         | 4         | 0.38      | 0:02:01  | 0.0  | y          | y      |
| 1505 | Gütersloh | 2000                    | 1.061            | 1.34      | 1.25      | 4         | 4         | 0.32      | 0:04:27  | 0.0  | y          | y      |
| 1506 | Soest     | 2000                    | 1.050            | 1.34      | 1.25      | 4         | 4         | 0.33      | 0:01:02  | 0.0  | y          | y      |
| 1507 | Dortmund  | 2000                    | 1.069            | 1.34      | 1.25      | 4         | 4         | 0.34      | 0:01:37  | 0.0  | y          | y      |
| 1508 | Kassel    | 2000                    | 1.062            | 1.34      | 1.25      | 4         | 4         | 0.32      | 0:01:10  | 0.0  | y          | y      |
| 1509 | Hannover  | 2000                    | 1.107            | 1.34      | 1.25      | 4         | 4         | 0.3       | 0:09:02  | 0.0  | y          | y      |
| 1510 | Krefeld   | 2000                    | 1.083            | 1.34      | 1.25      | 4         | 4         | 0.33      | 0:09:54  | 0.0  | y          | y      |
| 1511 | Münster   | 2000                    | 1.066            | 1.34      | 1.25      | 4         | 4         | 0.39      | 0:02:46  | 0.0  | y          | y      |
| 1512 | Paderborn | 2000                    | 1.050            | 1.34      | 1.25      | 4         | 4         | 0.4       | 0:02:17  | 0.0  | y          | y      |
| 1513 | Detmold   | 2000                    | 1.060            | 1.34      | 1.25      | 4         | 4         | 0.45      | 0:03:36  | 0.0  | y          | y      |
| 1514 | Bielefeld | 2000                    | 1.047            | 1.34      | 1.25      | 4         | 4         | 0.34      | 0:03:28  | 0.0  | y          | y      |
| 1515 | Gütersloh | 2000                    | 1.061            | 1.34      | 1.25      | 4         | 4         | 0.35      | 0:09:03  | 0.0  | y          | y      |
| 1516 | Soest     | 2000                    | 1.050            | 1.34      | 1.25      | 4         | 4         | 0.36      | 0:02:21  | 0.0  | y          | y      |
| 1517 | Dortmund  | 2000                    | 1.069            | 1.34      | 1.25      | 4         | 4         | 0.37      | 0:05:08  | 0.0  | y          | y      |
| 1518 | Kassel    | 2000                    | 1.062            | 1.34      | 1.25      | 4         | 4         | 0.41      | 0:04:22  | 0.0  | y          | y      |
| 1519 | Hannover  | 2000                    | 1.107            | 1.34      | 1.25      | 4         | 4         | 0.38      | 0:03:31  | 0.0  | y          | y      |
| 1520 | Krefeld   | 2000                    | 1.083            | 1.34      | 1.25      | 4         | 4         | 0.38      | 0:41:29  | 0.0  | y          | y      |
| 1521 | Münster   | 2000                    | 1.066            | 1.34      | 1.25      | 4         | 4         | 0.43      | 0:06:06  | 0.0  | y          | y      |
| 1522 | Paderborn | 2000                    | 1.050            | 1.34      | 1.25      | 4         | 4         | 0.43      | 0:06:20  | 0.0  | y          | y      |
| 1523 | Detmold   | 2000                    | 1.062            | 1.34      | 1.25      | 4         | 4         | 0.4       | 0:05:35  | 0.0  | y          | y      |
| 1524 | Bielefeld | 2000                    | 1.047            | 1.34      | 1.25      | 4         | 4         | 0.41      | 0:04:00  | 0.0  | y          | y      |
| 1525 | Gütersloh | 2000                    | 1.060            | 1.34      | 1.25      | 4         | 4         | 0.42      | 0:20:22  | 0.0  | y          | y      |
| 1526 | Soest     | 2000                    | 1.050            | 1.34      | 1.25      | 4         | 4         | 0.43      | 0:05:05  | 0.0  | y          | y      |
| 1527 | Dortmund  | 2000                    | 1.069            | 1.34      | 1.25      | 4         | 4         | 0.44      | 0:36:48  | 0.0  | y          | y      |
| 1528 | Kassel    | 2000                    | 1.062            | 1.34      | 1.25      | 4         | 4         | 0.43      | 0:04:32  | 0.0  | y          | y      |
| 1529 | Hannover  | 2000                    | 1.107            | 1.34      | 1.25      | 4         | 4         | 0.4       | 0:22:32  | 0.0  | y          | y      |
| 1530 | Krefeld   | 2000                    | 1.083            | 1.34      | 1.25      | 4         | 4         | 0.43      | 0:44:27  | 0.0  | y          | y      |
| 1531 | Münster   | 2000                    | 1.066            | 1.0       | 1.25      | 2         | 2         | 0.31      | 0:03:11  | 0.0  | y          | y      |
| 1532 | Paderborn | 2000                    | 1.050            | 1.0       | 1.25      | 2         | 2         | 0.29      | 0:01:19  | 0.0  | y          | y      |
| 1533 | Detmold   | 2000                    | 1.060            | 1.0       | 1.25      | 2         | 2         | 0.63      | 0:01:21  | 0.0  | y          | y      |
| 1534 | Bielefeld | 2000                    | 1.046            | 1.0       | 1.25      | 2         | 2         | 0.31      | 0:01:11  | 0.0  | y          | y      |
| 1535 | Gütersloh | 2000                    | 1.060            | 1.0       | 1.25      | 2         | 2         | 0.26      | 0:02:29  | 0.0  | y          | y      |
| 1536 | Soest     | 2000                    | 1.050            | 1.0       | 1.25      | 2         | 2         | 0.27      | 0:00:44  | 0.0  | y          | y      |
| 1537 | Dortmund  | 2000                    | 1.069            | 1.0       | 1.25      | 2         | 2         | 0.29      | 0:01:48  | 0.0  | y          | y      |
| 1538 | Kassel    | 2000                    | 1.062            | 1.0       | 1.25      | 2         | 2         | 0.27      | 0:01:05  | 0.0  | y          | y      |
| 1539 | Hannover  | 2000                    | 1.107            | 1.0       | 1.25      | 2         | 2         | 0.24      | 0:02:16  | 0.0  | y          | y      |
| 1540 | Krefeld   | 2000                    | 1.083            | 1.0       | 1.25      | 2         | 2         | 0.27      | 0:03:56  | 0.0  | y          | y      |
| 1541 | Münster   | 2000                    | 1.066            | 1.0       | 1.25      | 2         | 2         | 0.32      | 0:01:29  | 0.0  | y          | y      |
| 1542 | Paderborn | 2000                    | 1.050            | 1.0       | 1.25      | 2         | 2         | 0.35      | 0:03:10  | 0.0  | y          | y      |
| 1543 | Detmold   | 2000                    | 1.060            | 1.0       | 1.25      | 2         | 2         | 0.39      | 0:01:21  | 0.0  | y          | y      |
| 1544 | Bielefeld | 2000                    | 1.047            | 1.0       | 1.25      | 2         | 2         | 0.3       | 0:01:51  | 0.0  | y          | y      |
| 1545 | Gütersloh | 2000                    | 1.060            | 1.0       | 1.25      | 2         | 2         | 0.3       | 0:02:45  | 0.19 | y          | y      |

| #    | Network characteristics |           |                 |           |           |           |           |           | Solution |      | Simulation |        |
|------|-------------------------|-----------|-----------------|-----------|-----------|-----------|-----------|-----------|----------|------|------------|--------|
|      | <i>cn</i>               | <i>bu</i> | $\frac{nI}{bu}$ | <i>lf</i> | <i>tr</i> | <i>lt</i> | <i>tt</i> | <i>as</i> | Time     | Gap  | Volt       | Ampere |
| 1546 | Soest                   | 2000      | 1.050           | 1.0       | 1.25      | 2         | 2         | 0.32      | 0:01:32  | 0.0  | y          | y      |
| 1547 | Dortmund                | 2000      | 1.069           | 1.0       | 1.25      | 2         | 2         | 0.32      | 0:08:41  | 0.0  | y          | y      |
| 1548 | Kassel                  | 2000      | 1.062           | 1.0       | 1.25      | 2         | 2         | 0.35      | 0:04:23  | 0.0  | y          | y      |
| 1549 | Hannover                | 2000      | 1.107           | 1.0       | 1.25      | 2         | 2         | 0.34      | 0:03:05  | 0.0  | y          | y      |
| 1550 | Krefeld                 | 2000      | 1.083           | 1.0       | 1.25      | 2         | 2         | 0.32      | 0:03:43  | 0.0  | y          | y      |
| 1551 | Münster                 | 2000      | 1.066           | 1.0       | 1.25      | 2         | 2         | 0.41      | 0:01:59  | 0.0  | y          | y      |
| 1552 | Paderborn               | 2000      | 1.050           | 1.0       | 1.25      | 2         | 2         | 0.39      | 0:02:22  | 0.17 | y          | y      |
| 1553 | Detmold                 | 2000      | 1.060           | 1.0       | 1.25      | 2         | 2         | 0.39      | 0:01:38  | 0.0  | y          | y      |
| 1554 | Bielefeld               | 2000      | 1.046           | 1.0       | 1.25      | 2         | 2         | 0.43      | 0:02:38  | 0.0  | y          | y      |
| 1555 | Gütersloh               | 2000      | 1.060           | 1.0       | 1.25      | 2         | 2         | 0.38      | 0:14:24  | 0.0  | y          | y      |
| 1556 | Soest                   | 2000      | 1.050           | 1.0       | 1.25      | 2         | 2         | 0.4       | 0:02:23  | 0.0  | y          | y      |
| 1557 | Dortmund                | 2000      | 1.069           | 1.0       | 1.25      | 2         | 2         | 0.4       | 0:14:01  | 0.0  | y          | y      |
| 1558 | Kassel                  | 2000      | 1.062           | 1.0       | 1.25      | 2         | 2         | 0.39      | 0:02:52  | 0.0  | y          | y      |
| 1559 | Hannover                | 2000      | 1.107           | 1.0       | 1.25      | 2         | 2         | 0.36      | 0:08:38  | 0.01 | y          | y      |
| 1560 | Krefeld                 | 2000      | 1.083           | 1.0       | 1.25      | 2         | 2         | 0.39      | 0:10:57  | 0.0  | y          | y      |
| 1561 | Münster                 | 2000      | 1.066           | 1.0       | 1.25      | 3         | 3         | 0.35      | 0:01:49  | 0.0  | y          | y      |
| 1562 | Paderborn               | 2000      | 1.050           | 1.0       | 1.25      | 3         | 3         | 0.36      | 0:02:06  | 0.0  | y          | y      |
| 1563 | Detmold                 | 2000      | 1.060           | 1.0       | 1.25      | 3         | 3         | 0.63      | 0:02:38  | 0.0  | y          | y      |
| 1564 | Bielefeld               | 2000      | 1.046           | 1.0       | 1.25      | 3         | 3         | 0.39      | 0:01:21  | 0.0  | y          | y      |
| 1565 | Gütersloh               | 2000      | 1.060           | 1.0       | 1.25      | 3         | 3         | 0.29      | 0:01:12  | 0.0  | y          | y      |
| 1566 | Soest                   | 2000      | 1.050           | 1.0       | 1.25      | 3         | 3         | 0.3       | 0:01:19  | 0.0  | y          | y      |
| 1567 | Dortmund                | 2000      | 1.069           | 1.0       | 1.25      | 3         | 3         | 0.32      | 0:01:31  | 0.0  | y          | y      |
| 1568 | Kassel                  | 2000      | 1.062           | 1.0       | 1.25      | 3         | 3         | 0.3       | 0:01:28  | 0.0  | y          | y      |
| 1569 | Hannover                | 2000      | 1.107           | 1.0       | 1.25      | 3         | 3         | 0.27      | 0:04:17  | 0.0  | y          | y      |
| 1570 | Krefeld                 | 2000      | 1.083           | 1.0       | 1.25      | 3         | 3         | 0.3       | 0:12:53  | 0.0  | y          | y      |
| 1571 | Münster                 | 2000      | 1.066           | 1.0       | 1.25      | 3         | 3         | 0.35      | 0:02:02  | 0.0  | y          | y      |
| 1572 | Paderborn               | 2000      | 1.050           | 1.0       | 1.25      | 3         | 3         | 0.38      | 0:01:36  | 0.0  | y          | y      |
| 1573 | Detmold                 | 2000      | 1.060           | 1.0       | 1.25      | 3         | 3         | 0.42      | 0:01:38  | 0.0  | y          | y      |
| 1574 | Bielefeld               | 2000      | 1.047           | 1.0       | 1.25      | 3         | 3         | 0.32      | 0:02:09  | 0.0  | y          | y      |
| 1575 | Gütersloh               | 2000      | 1.060           | 1.0       | 1.25      | 3         | 3         | 0.33      | 0:11:52  | 0.0  | y          | y      |
| 1576 | Soest                   | 2000      | 1.050           | 1.0       | 1.25      | 3         | 3         | 0.34      | 0:02:29  | 0.0  | y          | y      |
| 1577 | Dortmund                | 2000      | 1.069           | 1.0       | 1.25      | 3         | 3         | 0.35      | 0:02:48  | 0.0  | y          | y      |
| 1578 | Kassel                  | 2000      | 1.062           | 1.0       | 1.25      | 3         | 3         | 0.38      | 0:05:13  | 0.0  | y          | y      |
| 1579 | Hannover                | 2000      | 1.107           | 1.0       | 1.25      | 3         | 3         | 0.36      | 0:10:59  | 0.0  | y          | y      |
| 1580 | Krefeld                 | 2000      | 1.083           | 1.0       | 1.25      | 3         | 3         | 0.34      | 0:04:29  | 0.0  | y          | y      |
| 1581 | Münster                 | 2000      | 1.065           | 1.0       | 1.25      | 3         | 3         | 0.39      | 0:04:42  | 0.0  | y          | y      |
| 1582 | Paderborn               | 2000      | 1.050           | 1.0       | 1.25      | 3         | 3         | 0.43      | 0:24:28  | 0.0  | n          | y      |
| 1583 | Detmold                 | 2000      | 1.062           | 1.0       | 1.25      | 3         | 3         | 0.38      | 0:04:17  | 0.0  | y          | y      |
| 1584 | Bielefeld               | 2000      | 1.046           | 1.0       | 1.25      | 3         | 3         | 0.45      | 0:08:53  | 0.0  | y          | y      |
| 1585 | Gütersloh               | 2000      | 1.060           | 1.0       | 1.25      | 3         | 3         | 0.4       | 0:05:20  | 0.0  | y          | y      |
| 1586 | Soest                   | 2000      | 1.050           | 1.0       | 1.25      | 3         | 3         | 0.41      | 0:05:25  | 0.0  | y          | y      |
| 1587 | Dortmund                | 2000      | 1.069           | 1.0       | 1.25      | 3         | 3         | 0.42      | 0:18:10  | 0.0  | y          | y      |
| 1588 | Kassel                  | 2000      | 1.062           | 1.0       | 1.25      | 3         | 3         | 0.41      | 0:07:09  | 0.0  | y          | y      |
| 1589 | Hannover                | 2000      | 1.107           | 1.0       | 1.25      | 3         | 3         | 0.38      | 0:18:01  | 0.0  | y          | y      |
| 1590 | Krefeld                 | 2000      | 1.084           | 1.0       | 1.25      | 3         | 3         | 0.41      | 0:18:41  | 0.0  | y          | y      |
| 1591 | Münster                 | 2000      | 1.065           | 1.0       | 1.25      | 4         | 4         | 0.29      | 0:02:00  | 0.0  | y          | y      |
| 1592 | Paderborn               | 2000      | 1.050           | 1.0       | 1.25      | 4         | 4         | 0.35      | 0:01:14  | 0.0  | y          | y      |
| 1593 | Detmold                 | 2000      | 1.060           | 1.0       | 1.25      | 4         | 4         | 0.63      | 0:02:17  | 0.0  | y          | y      |
| 1594 | Bielefeld               | 2000      | 1.046           | 1.0       | 1.25      | 4         | 4         | 0.42      | 0:01:22  | 0.0  | y          | y      |
| 1595 | Gütersloh               | 2000      | 1.060           | 1.0       | 1.25      | 4         | 4         | 0.32      | 0:01:53  | 0.0  | y          | y      |
| 1596 | Soest                   | 2000      | 1.050           | 1.0       | 1.25      | 4         | 4         | 0.33      | 0:03:16  | 0.0  | y          | y      |
| 1597 | Dortmund                | 2000      | 1.069           | 1.0       | 1.25      | 4         | 4         | 0.34      | 0:02:31  | 0.0  | y          | y      |

| #    | Network characteristics |           |                  |           |           |           |           |           | Solution |      | Simulation |        |
|------|-------------------------|-----------|------------------|-----------|-----------|-----------|-----------|-----------|----------|------|------------|--------|
|      | <i>cn</i>               | <i>bu</i> | $\frac{n_l}{bu}$ | <i>lf</i> | <i>tr</i> | <i>lt</i> | <i>tt</i> | <i>as</i> | Time     | Gap  | Volt       | Ampere |
| 1598 | Kassel                  | 2000      | 1.062            | 1.0       | 1.25      | 4         | 4         | 0.32      | 0:01:58  | 0.0  | y          | y      |
| 1599 | Hannover                | 2000      | 1.107            | 1.0       | 1.25      | 4         | 4         | 0.3       | 0:09:22  | 0.0  | y          | y      |
| 1600 | Krefeld                 | 2000      | 1.083            | 1.0       | 1.25      | 4         | 4         | 0.34      | 0:04:46  | 0.0  | y          | y      |
| 1601 | Münster                 | 2000      | 1.066            | 1.0       | 1.25      | 4         | 4         | 0.39      | 0:02:40  | 0.0  | y          | y      |
| 1602 | Paderborn               | 2000      | 1.050            | 1.0       | 1.25      | 4         | 4         | 0.4       | 0:05:38  | 0.0  | y          | y      |
| 1603 | Detmold                 | 2000      | 1.060            | 1.0       | 1.25      | 4         | 4         | 0.45      | 0:03:13  | 0.0  | y          | y      |
| 1604 | Bielefeld               | 2000      | 1.047            | 1.0       | 1.25      | 4         | 4         | 0.34      | 0:04:53  | 0.0  | y          | y      |
| 1605 | Gütersloh               | 2000      | 1.061            | 1.0       | 1.25      | 4         | 4         | 0.35      | 0:04:28  | 0.0  | y          | y      |
| 1606 | Soest                   | 2000      | 1.050            | 1.0       | 1.25      | 4         | 4         | 0.36      | 0:02:33  | 0.0  | y          | y      |
| 1607 | Dortmund                | 2000      | 1.069            | 1.0       | 1.25      | 4         | 4         | 0.37      | 0:26:29  | 0.24 | y          | y      |
| 1608 | Kassel                  | 2000      | 1.062            | 1.0       | 1.25      | 4         | 4         | 0.41      | 0:04:01  | 0.0  | y          | y      |
| 1609 | Hannover                | 2000      | 1.107            | 1.0       | 1.25      | 4         | 4         | 0.38      | 0:32:51  | 0.35 | y          | y      |
| 1610 | Krefeld                 | 2000      | 1.083            | 1.0       | 1.25      | 4         | 4         | 0.38      | 0:29:18  | 0.0  | y          | y      |
| 1611 | Münster                 | 2000      | 1.066            | 1.0       | 1.25      | 4         | 4         | 0.44      | 0:08:28  | 0.16 | y          | y      |
| 1612 | Paderborn               | 2000      | 1.050            | 1.0       | 1.25      | 4         | 4         | 0.45      | 0:06:02  | 0.15 | n          | y      |
| 1613 | Detmold                 | 2000      | 1.060            | 1.0       | 1.25      | 4         | 4         | 0.44      | 0:04:16  | 0.0  | y          | y      |
| 1614 | Bielefeld               | 2000      | 1.046            | 1.0       | 1.25      | 4         | 4         | 0.47      | 0:09:13  | 0.0  | y          | y      |
| 1615 | Gütersloh               | 2000      | 1.061            | 1.0       | 1.25      | 4         | 4         | 0.44      | 0:18:30  | 0.0  | y          | y      |
| 1616 | Soest                   | 2000      | 1.050            | 1.0       | 1.25      | 4         | 4         | 0.43      | 0:02:41  | 0.0  | y          | y      |
| 1617 | Dortmund                | 2000      | 1.069            | 1.0       | 1.25      | 4         | 4         | 0.44      | 0:29:54  | 0.0  | y          | y      |
| 1618 | Kassel                  | 2000      | 1.061            | 1.0       | 1.25      | 4         | 4         | 0.44      | 0:02:23  | 0.0  | y          | y      |
| 1619 | Hannover                | 2000      | 1.107            | 1.0       | 1.25      | 4         | 4         | 0.4       | 0:20:36  | 0.0  | y          | y      |
| 1620 | Krefeld                 | 2000      | 1.083            | 1.0       | 1.25      | 4         | 4         | 0.47      | 0:04:52  | 0.0  | y          | y      |
| 1621 | Münster                 | 3000      | 1.065            | 0.83      | 0.77      | 2         | 2         | 0.3       | 0:02:46  | 0.0  | y          | y      |
| 1622 | Paderborn               | 3000      | 1.047            | 0.83      | 0.77      | 2         | 2         | 0.32      | 0:01:46  | 0.0  | y          | y      |
| 1623 | Detmold                 | 3000      | 1.052            | 0.83      | 0.77      | 2         | 2         | 0.27      | 0:13:06  | 0.0  | y          | y      |
| 1624 | Bielefeld               | 3000      | 1.046            | 0.83      | 0.77      | 2         | 2         | 0.26      | 0:03:52  | 0.0  | y          | y      |
| 1625 | Gütersloh               | 3000      | 1.065            | 0.83      | 0.77      | 2         | 2         | 0.38      | 0:13:13  | 0.0  | y          | y      |
| 1626 | Soest                   | 3000      | 1.054            | 0.83      | 0.77      | 2         | 2         | 0.3       | 0:02:34  | 0.0  | y          | y      |
| 1627 | Dortmund                | 3000      | 1.068            | 0.83      | 0.77      | 2         | 2         | 0.25      | 0:03:11  | 0.0  | y          | y      |
| 1628 | Kassel                  | 3000      | 1.059            | 0.83      | 0.77      | 2         | 2         | 0.25      | 0:11:57  | 0.0  | y          | y      |
| 1629 | Hannover                | 3000      | 1.128            | 0.83      | 0.77      | 2         | 2         | 0.4       | 0:23:06  | 0.0  | y          | y      |
| 1630 | Krefeld                 | 3000      | 1.091            | 0.83      | 0.77      | 2         | 2         | 0.28      | 0:15:01  | 0.0  | y          | y      |
| 1631 | Münster                 | 3000      | 1.065            | 0.83      | 0.77      | 2         | 2         | 0.31      | 0:09:36  | 0.0  | y          | y      |
| 1632 | Paderborn               | 3000      | 1.047            | 0.83      | 0.77      | 2         | 2         | 0.31      | 6:16:30  | 0.0  | y          | y      |
| 1633 | Detmold                 | 3000      | 1.052            | 0.83      | 0.77      | 2         | 2         | 0.31      | 0:10:23  | 0.0  | y          | y      |
| 1634 | Bielefeld               | 3000      | 1.046            | 0.83      | 0.77      | 2         | 2         | 0.34      | 0:03:30  | 0.0  | y          | y      |
| 1635 | Gütersloh               | 3000      | 1.065            | 0.83      | 0.77      | 2         | 2         | 0.34      | 0:18:32  | 0.0  | y          | y      |
| 1636 | Soest                   | 3000      | 1.054            | 0.83      | 0.77      | 2         | 2         | 0.36      | 0:03:16  | 0.0  | y          | y      |
| 1637 | Dortmund                | 3000      | 1.068            | 0.83      | 0.77      | 2         | 2         | 0.37      | 1:12:43  | 0.26 | y          | y      |
| 1638 | Kassel                  | 3000      | 1.059            | 0.83      | 0.77      | 2         | 2         | 0.3       | 0:06:12  | 0.0  | y          | y      |
| 1639 | Hannover                | 3000      | 1.128            | 0.83      | 0.77      | 2         | 2         | 0.38      | 0:05:20  | 0.0  | y          | y      |
| 1640 | Krefeld                 | 3000      | 1.092            | 0.83      | 0.77      | 2         | 2         | 0.33      | 0:21:19  | 0.0  | y          | y      |
| 1641 | Münster                 | 3000      | 1.065            | 0.83      | 0.77      | 2         | 2         | 0.38      | 0:18:56  | 0.0  | y          | y      |
| 1642 | Paderborn               | 3000      | 1.047            | 0.83      | 0.77      | 2         | 2         | 0.4       | 1:01:28  | 0.0  | y          | y      |
| 1643 | Detmold                 | 3000      | 1.052            | 0.83      | 0.77      | 2         | 2         | 0.38      | 0:13:37  | 0.0  | y          | y      |
| 1644 | Bielefeld               | 3000      | 1.046            | 0.83      | 0.77      | 2         | 2         | 0.4       | 0:26:02  | 0.0  | y          | y      |
| 1645 | Gütersloh               | 3000      | 1.066            | 0.83      | 0.77      | 2         | 2         | 0.4       | 1:11:59  | 0.0  | y          | y      |
| 1646 | Soest                   | 3000      | 1.054            | 0.83      | 0.77      | 2         | 2         | 0.41      | 0:06:45  | 0.0  | y          | y      |
| 1647 | Dortmund                | 3000      | 1.068            | 0.83      | 0.77      | 2         | 2         | 0.4       | 0:12:18  | 0.0  | y          | y      |
| 1648 | Kassel                  | 3000      | 1.059            | 0.83      | 0.77      | 2         | 2         | 0.36      | 0:05:00  | 0.0  | y          | y      |
| 1649 | Hannover                | 3000      | 1.128            | 0.83      | 0.77      | 2         | 2         | 0.41      | 0:40:19  | 0.0  | y          | y      |

| #    | Network characteristics |           |                  |           |           |           |           | Solution  |          | Simulation |      |        |
|------|-------------------------|-----------|------------------|-----------|-----------|-----------|-----------|-----------|----------|------------|------|--------|
|      | <i>cn</i>               | <i>bu</i> | $\frac{n_l}{bu}$ | <i>lf</i> | <i>tr</i> | <i>lt</i> | <i>tt</i> | <i>as</i> | Time     | Gap        | Volt | Ampere |
| 1650 | Krefeld                 | 3000      | 1.091            | 0.83      | 0.77      | 2         | 2         | 0.43      | 0:22:34  | 0.0        | y    | y      |
| 1651 | Münster                 | 3000      | 1.065            | 0.83      | 0.77      | 3         | 3         | 0.28      | 0:06:05  | 0.0        | y    | y      |
| 1652 | Paderborn               | 3000      | 1.047            | 0.83      | 0.77      | 3         | 3         | 0.31      | 0:02:41  | 0.0        | y    | y      |
| 1653 | Detmold                 | 3000      | 1.052            | 0.83      | 0.77      | 3         | 3         | 0.3       | 5:45:21  | 0.0        | y    | y      |
| 1654 | Bielefeld               | 3000      | 1.046            | 0.83      | 0.77      | 3         | 3         | 0.29      | 0:11:27  | 0.0        | y    | y      |
| 1655 | Gütersloh               | 3000      | 1.065            | 0.83      | 0.77      | 3         | 3         | 0.34      | 0:10:53  | 0.0        | y    | y      |
| 1656 | Soest                   | 3000      | 1.054            | 0.83      | 0.77      | 3         | 3         | 0.29      | 0:02:41  | 0.0        | y    | y      |
| 1657 | Dortmund                | 3000      | 1.068            | 0.83      | 0.77      | 3         | 3         | 0.29      | 0:08:38  | 0.0        | y    | y      |
| 1658 | Kassel                  | 3000      | 1.059            | 0.83      | 0.77      | 3         | 3         | 0.28      | 0:05:10  | 0.0        | y    | y      |
| 1659 | Hannover                | 3000      | 1.128            | 0.83      | 0.77      | 3         | 3         | 0.44      | 0:31:15  | 0.0        | y    | y      |
| 1660 | Krefeld                 | 3000      | 1.092            | 0.83      | 0.77      | 3         | 3         | 0.33      | 1:16:19  | 0.0        | y    | y      |
| 1661 | Münster                 | 3000      | 1.065            | 0.83      | 0.77      | 3         | 3         | 0.33      | 0:04:34  | 0.0        | y    | y      |
| 1662 | Paderborn               | 3000      | 1.047            | 0.83      | 0.77      | 3         | 3         | 0.33      | 0:05:30  | 0.15       | y    | y      |
| 1663 | Detmold                 | 3000      | 1.052            | 0.83      | 0.77      | 3         | 3         | 0.33      | 0:13:31  | 0.0        | y    | y      |
| 1664 | Bielefeld               | 3000      | 1.046            | 0.83      | 0.77      | 3         | 3         | 0.36      | 0:13:24  | 0.0        | y    | y      |
| 1665 | Gütersloh               | 3000      | 1.066            | 0.83      | 0.77      | 3         | 3         | 0.41      | 1:54:19  | 0.0        | y    | y      |
| 1666 | Soest                   | 3000      | 1.054            | 0.83      | 0.77      | 3         | 3         | 0.39      | 0:05:47  | 0.0        | y    | y      |
| 1667 | Dortmund                | 3000      | 1.068            | 0.83      | 0.77      | 3         | 3         | 0.36      | 0:23:33  | 0.0        | y    | y      |
| 1668 | Kassel                  | 3000      | 1.059            | 0.83      | 0.77      | 3         | 3         | 0.33      | 0:03:08  | 0.19       | y    | y      |
| 1669 | Hannover                | 3000      | 1.128            | 0.83      | 0.77      | 3         | 3         | 0.42      | 0:06:33  | 0.0        | y    | y      |
| 1670 | Krefeld                 | 3000      | 1.091            | 0.83      | 0.77      | 3         | 3         | 0.36      | 0:44:19  | 0.0        | y    | y      |
| 1671 | Münster                 | 3000      | 1.065            | 0.83      | 0.77      | 3         | 3         | 0.4       | 2:57:34  | 0.0        | y    | y      |
| 1672 | Paderborn               | 3000      | 1.047            | 0.83      | 0.77      | 3         | 3         | 0.42      | 2:53:15  | 0.0        | y    | y      |
| 1673 | Detmold                 | 3000      | 1.052            | 0.83      | 0.77      | 3         | 3         | 0.4       | 0:36:12  | 0.0        | y    | y      |
| 1674 | Bielefeld               | 3000      | 1.046            | 0.83      | 0.77      | 3         | 3         | 0.42      | 2:41:41  | 0.0        | y    | y      |
| 1675 | Gütersloh               | 3000      | 1.065            | 0.83      | 0.77      | 3         | 3         | 0.42      | *        | *          | *    | *      |
| 1676 | Soest                   | 3000      | 1.054            | 0.83      | 0.77      | 3         | 3         | 0.4       | 0:38:39  | 0.0        | y    | y      |
| 1677 | Dortmund                | 3000      | 1.068            | 0.83      | 0.77      | 3         | 3         | 0.41      | 0:44:13  | 0.0        | y    | y      |
| 1678 | Kassel                  | 3000      | 1.059            | 0.83      | 0.77      | 3         | 3         | 0.38      | 0:06:41  | 0.0        | y    | y      |
| 1679 | Hannover                | 3000      | 1.128            | 0.83      | 0.77      | 3         | 3         | 0.44      | 1:29:52  | 0.11       | y    | y      |
| 1680 | Krefeld                 | 3000      | 1.091            | 0.83      | 0.77      | 3         | 3         | 0.46      | 1:04:07  | 0.0        | y    | y      |
| 1681 | Münster                 | 3000      | 1.065            | 0.83      | 0.77      | 4         | 4         | 0.36      | 0:03:17  | 0.0        | y    | y      |
| 1682 | Paderborn               | 3000      | 1.047            | 0.83      | 0.77      | 4         | 4         | 0.33      | 0:16:36  | 0.0        | y    | y      |
| 1683 | Detmold                 | 3000      | 1.052            | 0.83      | 0.77      | 4         | 4         | 0.32      | 0:17:16  | 0.0        | y    | y      |
| 1684 | Bielefeld               | 3000      | 1.046            | 0.83      | 0.77      | 4         | 4         | 0.39      | 0:07:28  | 0.0        | y    | y      |
| 1685 | Gütersloh               | 3000      | 1.066            | 0.83      | 0.77      | 4         | 4         | 0.35      | 0:20:13  | 0.0        | y    | y      |
| 1686 | Soest                   | 3000      | 1.054            | 0.83      | 0.77      | 4         | 4         | 0.36      | 0:02:44  | 0.0        | y    | y      |
| 1687 | Dortmund                | 3000      | 1.068            | 0.83      | 0.77      | 4         | 4         | 0.3       | 0:28:29  | 0.0        | y    | y      |
| 1688 | Kassel                  | 3000      | 1.059            | 0.83      | 0.77      | 4         | 4         | 0.3       | 0:12:29  | 0.0        | y    | y      |
| 1689 | Hannover                | 3000      | 1.128            | 0.83      | 0.77      | 4         | 4         | 0.46      | 1:17:04  | 0.0        | y    | y      |
| 1690 | Krefeld                 | 3000      | 1.092            | 0.83      | 0.77      | 4         | 4         | 0.36      | 0:08:03  | 0.0        | y    | y      |
| 1691 | Münster                 | 3000      | 1.065            | 0.83      | 0.77      | 4         | 4         | 0.36      | 0:15:07  | 0.0        | y    | y      |
| 1692 | Paderborn               | 3000      | 1.047            | 0.83      | 0.77      | 4         | 4         | 0.35      | 0:30:27  | 0.29       | y    | y      |
| 1693 | Detmold                 | 3000      | 1.052            | 0.83      | 0.77      | 4         | 4         | 0.35      | 0:16:00  | 0.0        | y    | y      |
| 1694 | Bielefeld               | 3000      | 1.046            | 0.83      | 0.77      | 4         | 4         | 0.39      | 0:20:20  | 0.0        | y    | y      |
| 1695 | Gütersloh               | 3000      | 1.066            | 0.83      | 0.77      | 4         | 4         | 0.44      | 1:55:09  | 0.0        | y    | y      |
| 1696 | Soest                   | 3000      | 1.054            | 0.83      | 0.77      | 4         | 4         | 0.36      | 0:07:25  | 0.0        | y    | y      |
| 1697 | Dortmund                | 3000      | 1.068            | 0.83      | 0.77      | 4         | 4         | 0.38      | 2:41:17  | 0.0        | y    | y      |
| 1698 | Kassel                  | 3000      | 1.059            | 0.83      | 0.77      | 4         | 4         | 0.35      | 0:04:53  | 0.0        | y    | y      |
| 1699 | Hannover                | 3000      | 1.128            | 0.83      | 0.77      | 4         | 4         | 0.44      | 12:13:20 | 0.14       | y    | y      |
| 1700 | Krefeld                 | 3000      | 1.092            | 0.83      | 0.77      | 4         | 4         | 0.38      | 0:28:19  | 0.0        | y    | y      |
| 1701 | Münster                 | 3000      | 1.065            | 0.83      | 0.77      | 4         | 4         | 0.42      | 5:28:47  | 0.0        | y    | y      |

| #    | <i>cn</i> | Network characteristics |                 |           |           |           |           |           | Solution |      | Simulation |        |
|------|-----------|-------------------------|-----------------|-----------|-----------|-----------|-----------|-----------|----------|------|------------|--------|
|      |           | <i>bu</i>               | $\frac{nl}{bu}$ | <i>lf</i> | <i>tr</i> | <i>lt</i> | <i>tt</i> | <i>as</i> | Time     | Gap  | Volt       | Ampere |
| 1702 | Paderborn | 3000                    | 1.047           | 0.83      | 0.77      | 4         | 4         | 0.44      | 3:39:50  | 0.0  | y          | y      |
| 1703 | Detmold   | 3000                    | 1.052           | 0.83      | 0.77      | 4         | 4         | 0.42      | 1:02:32  | 0.0  | y          | y      |
| 1704 | Bielefeld | 3000                    | 1.046           | 0.83      | 0.77      | 4         | 4         | 0.44      | 2:01:05  | 0.0  | y          | y      |
| 1705 | Gütersloh | 3000                    | 1.065           | 0.83      | 0.77      | 4         | 4         | 0.44      | *        | *    | *          | *      |
| 1706 | Soest     | 3000                    | 1.054           | 0.83      | 0.77      | 4         | 4         | 0.46      | 0:32:29  | 0.0  | y          | y      |
| 1707 | Dortmund  | 3000                    | 1.068           | 0.83      | 0.77      | 4         | 4         | 0.43      | 9:03:01  | 0.0  | y          | y      |
| 1708 | Kassel    | 3000                    | 1.059           | 0.83      | 0.77      | 4         | 4         | 0.4       | 0:20:32  | 0.0  | y          | y      |
| 1709 | Hannover  | 3000                    | 1.128           | 0.83      | 0.77      | 4         | 4         | 0.46      | 0:36:27  | 0.0  | y          | y      |
| 1710 | Krefeld   | 3000                    | 1.092           | 0.83      | 0.77      | 4         | 4         | 0.44      | *        | *    | *          | *      |
| 1711 | Münster   | 3000                    | 1.065           | 1.34      | 0.77      | 2         | 2         | 0.3       | 0:02:38  | 0.0  | y          | y      |
| 1712 | Paderborn | 3000                    | 1.047           | 1.34      | 0.77      | 2         | 2         | 0.28      | 0:02:41  | 0.0  | y          | y      |
| 1713 | Detmold   | 3000                    | 1.052           | 1.34      | 0.77      | 2         | 2         | 0.27      | 0:12:15  | 0.0  | y          | y      |
| 1714 | Bielefeld | 3000                    | 1.046           | 1.34      | 0.77      | 2         | 2         | 0.26      | 0:10:43  | 0.0  | y          | y      |
| 1715 | Gütersloh | 3000                    | 1.065           | 1.34      | 0.77      | 2         | 2         | 0.31      | 0:03:15  | 0.0  | y          | y      |
| 1716 | Soest     | 3000                    | 1.054           | 1.34      | 0.77      | 2         | 2         | 0.26      | 0:03:58  | 0.0  | y          | y      |
| 1717 | Dortmund  | 3000                    | 1.068           | 1.34      | 0.77      | 2         | 2         | 0.41      | 0:02:59  | 0.0  | y          | y      |
| 1718 | Kassel    | 3000                    | 1.059           | 1.34      | 0.77      | 2         | 2         | 0.25      | 0:02:45  | 0.0  | y          | y      |
| 1719 | Hannover  | 3000                    | 1.128           | 1.34      | 0.77      | 2         | 2         | 0.4       | 0:51:58  | 0.0  | y          | y      |
| 1720 | Krefeld   | 3000                    | 1.091           | 1.34      | 0.77      | 2         | 2         | 0.28      | 3:07:40  | 0.0  | y          | y      |
| 1721 | Münster   | 3000                    | 1.065           | 1.34      | 0.77      | 2         | 2         | 0.31      | 0:06:41  | 0.0  | y          | y      |
| 1722 | Paderborn | 3000                    | 1.047           | 1.34      | 0.77      | 2         | 2         | 0.31      | 0:06:24  | 0.0  | y          | y      |
| 1723 | Detmold   | 3000                    | 1.052           | 1.34      | 0.77      | 2         | 2         | 0.35      | 2:47:34  | 0.26 | y          | y      |
| 1724 | Bielefeld | 3000                    | 1.046           | 1.34      | 0.77      | 2         | 2         | 0.34      | 0:06:08  | 0.0  | y          | y      |
| 1725 | Gütersloh | 3000                    | 1.065           | 1.34      | 0.77      | 2         | 2         | 0.34      | 0:18:31  | 0.0  | y          | y      |
| 1726 | Soest     | 3000                    | 1.054           | 1.34      | 0.77      | 2         | 2         | 0.34      | *        | *    | *          | *      |
| 1727 | Dortmund  | 3000                    | 1.068           | 1.34      | 0.77      | 2         | 2         | 0.33      | 0:30:34  | 0.0  | y          | y      |
| 1728 | Kassel    | 3000                    | 1.059           | 1.34      | 0.77      | 2         | 2         | 0.3       | 0:09:56  | 0.0  | y          | y      |
| 1729 | Hannover  | 3000                    | 1.128           | 1.34      | 0.77      | 2         | 2         | 0.38      | 0:52:36  | 0.0  | y          | y      |
| 1730 | Krefeld   | 3000                    | 1.091           | 1.34      | 0.77      | 2         | 2         | 0.34      | 7:51:16  | 0.0  | y          | y      |
| 1731 | Münster   | 3000                    | 1.065           | 1.34      | 0.77      | 2         | 2         | 0.38      | 3:02:01  | 0.0  | y          | y      |
| 1732 | Paderborn | 3000                    | 1.047           | 1.34      | 0.77      | 2         | 2         | 0.39      | 0:11:45  | 0.0  | y          | y      |
| 1733 | Detmold   | 3000                    | 1.052           | 1.34      | 0.77      | 2         | 2         | 0.38      | 4:32:13  | 0.36 | y          | y      |
| 1734 | Bielefeld | 3000                    | 1.046           | 1.34      | 0.77      | 2         | 2         | 0.4       | 0:10:19  | 0.0  | y          | y      |
| 1735 | Gütersloh | 3000                    | 1.066           | 1.34      | 0.77      | 2         | 2         | 0.4       | 1:56:49  | 0.0  | y          | y      |
| 1736 | Soest     | 3000                    | 1.054           | 1.34      | 0.77      | 2         | 2         | 0.39      | 3:19:19  | 0.0  | y          | y      |
| 1737 | Dortmund  | 3000                    | 1.068           | 1.34      | 0.77      | 2         | 2         | 0.38      | 12:59:07 | 0.1  | y          | y      |
| 1738 | Kassel    | 3000                    | 1.059           | 1.34      | 0.77      | 2         | 2         | 0.36      | 0:08:06  | 0.0  | y          | y      |
| 1739 | Hannover  | 3000                    | 1.128           | 1.34      | 0.77      | 2         | 2         | 0.41      | 0:36:39  | 0.0  | y          | y      |
| 1740 | Krefeld   | 3000                    | 1.091           | 1.34      | 0.77      | 2         | 2         | 0.43      | 1:19:01  | 0.28 | y          | y      |
| 1741 | Münster   | 3000                    | 1.065           | 1.34      | 0.77      | 3         | 3         | 0.33      | 0:12:01  | 0.0  | y          | y      |
| 1742 | Paderborn | 3000                    | 1.047           | 1.34      | 0.77      | 3         | 3         | 0.31      | 0:06:02  | 0.0  | y          | y      |
| 1743 | Detmold   | 3000                    | 1.052           | 1.34      | 0.77      | 3         | 3         | 0.3       | 7:50:04  | 0.0  | y          | y      |
| 1744 | Bielefeld | 3000                    | 1.046           | 1.34      | 0.77      | 3         | 3         | 0.29      | 0:22:07  | 0.0  | n          | y      |
| 1745 | Gütersloh | 3000                    | 1.066           | 1.34      | 0.77      | 3         | 3         | 0.33      | 0:07:40  | 0.0  | y          | y      |
| 1746 | Soest     | 3000                    | 1.054           | 1.34      | 0.77      | 3         | 3         | 0.33      | 0:05:32  | 0.0  | y          | y      |
| 1747 | Dortmund  | 3000                    | 1.068           | 1.34      | 0.77      | 3         | 3         | 0.27      | 1:03:01  | 0.0  | y          | y      |
| 1748 | Kassel    | 3000                    | 1.059           | 1.34      | 0.77      | 3         | 3         | 0.28      | 0:05:39  | 0.2  | y          | y      |
| 1749 | Hannover  | 3000                    | 1.128           | 1.34      | 0.77      | 3         | 3         | 0.44      | 0:30:22  | 0.0  | y          | y      |
| 1750 | Krefeld   | 3000                    | 1.091           | 1.34      | 0.77      | 3         | 3         | 0.3       | 8:39:19  | 0.0  | y          | y      |
| 1751 | Münster   | 3000                    | 1.064           | 1.34      | 0.77      | 3         | 3         | 0.4       | *        | *    | *          | *      |
| 1752 | Paderborn | 3000                    | 1.047           | 1.34      | 0.77      | 3         | 3         | 0.33      | 0:21:45  | 0.0  | y          | y      |
| 1753 | Detmold   | 3000                    | 1.052           | 1.34      | 0.77      | 3         | 3         | 0.34      | 0:25:45  | 0.0  | y          | y      |

| #    | <i>cn</i> | Network characteristics |                 |           |           |           |           |           | Solution |      | Simulation |        |
|------|-----------|-------------------------|-----------------|-----------|-----------|-----------|-----------|-----------|----------|------|------------|--------|
|      |           | <i>bu</i>               | $\frac{nl}{bu}$ | <i>lf</i> | <i>tr</i> | <i>lt</i> | <i>tt</i> | <i>as</i> | Time     | Gap  | Volt       | Ampere |
| 1754 | Bielefeld | 3000                    | 1.046           | 1.34      | 0.77      | 3         | 3         | 0.36      | 0:08:02  | 0.0  | n          | y      |
| 1755 | Gütersloh | 3000                    | 1.066           | 1.34      | 0.77      | 3         | 3         | 0.41      | 0:26:12  | 0.0  | y          | y      |
| 1756 | Soest     | 3000                    | 1.054           | 1.34      | 0.77      | 3         | 3         | 0.39      | 0:26:47  | 0.0  | y          | y      |
| 1757 | Dortmund  | 3000                    | 1.068           | 1.34      | 0.77      | 3         | 3         | 0.39      | 0:05:35  | 0.0  | y          | y      |
| 1758 | Kassel    | 3000                    | 1.059           | 1.34      | 0.77      | 3         | 3         | 0.33      | 0:06:56  | 0.0  | y          | y      |
| 1759 | Hannover  | 3000                    | 1.128           | 1.34      | 0.77      | 3         | 3         | 0.42      | 0:45:12  | 0.0  | y          | y      |
| 1760 | Krefeld   | 3000                    | 1.092           | 1.34      | 0.77      | 3         | 3         | 0.36      | 3:41:55  | 0.0  | y          | y      |
| 1761 | Münster   | 3000                    | 1.065           | 1.34      | 0.77      | 3         | 3         | 0.4       | *        | *    | *          | *      |
| 1762 | Paderborn | 3000                    | 1.047           | 1.34      | 0.77      | 3         | 3         | 0.42      | 7:46:48  | 0.49 | n          | y      |
| 1763 | Detmold   | 3000                    | 1.052           | 1.34      | 0.77      | 3         | 3         | 0.4       | *        | *    | *          | *      |
| 1764 | Bielefeld | 3000                    | 1.046           | 1.34      | 0.77      | 3         | 3         | 0.42      | 1:09:10  | 0.0  | n          | y      |
| 1765 | Gütersloh | 3000                    | 1.065           | 1.34      | 0.77      | 3         | 3         | 0.42      | *        | *    | *          | *      |
| 1766 | Soest     | 3000                    | 1.054           | 1.34      | 0.77      | 3         | 3         | 0.4       | 12:14:58 | 0.32 | y          | y      |
| 1767 | Dortmund  | 3000                    | 1.068           | 1.34      | 0.77      | 3         | 3         | 0.43      | 0:40:09  | 0.1  | y          | y      |
| 1768 | Kassel    | 3000                    | 1.059           | 1.34      | 0.77      | 3         | 3         | 0.38      | 0:08:07  | 0.0  | y          | y      |
| 1769 | Hannover  | 3000                    | 1.128           | 1.34      | 0.77      | 3         | 3         | 0.44      | *        | *    | *          | *      |
| 1770 | Krefeld   | 3000                    | 1.091           | 1.34      | 0.77      | 3         | 3         | 0.42      | *        | *    | *          | *      |
| 1771 | Münster   | 3000                    | 1.065           | 1.34      | 0.77      | 4         | 4         | 0.36      | 0:34:27  | 0.0  | y          | y      |
| 1772 | Paderborn | 3000                    | 1.047           | 1.34      | 0.77      | 4         | 4         | 0.33      | 0:30:27  | 0.0  | y          | y      |
| 1773 | Detmold   | 3000                    | 1.052           | 1.34      | 0.77      | 4         | 4         | 0.32      | 0:11:01  | 0.0  | y          | y      |
| 1774 | Bielefeld | 3000                    | 1.046           | 1.34      | 0.77      | 4         | 4         | 0.31      | 0:07:24  | 0.0  | n          | y      |
| 1775 | Gütersloh | 3000                    | 1.065           | 1.34      | 0.77      | 4         | 4         | 0.37      | 0:21:46  | 0.0  | y          | y      |
| 1776 | Soest     | 3000                    | 1.054           | 1.34      | 0.77      | 4         | 4         | 0.32      | 0:19:57  | 0.0  | y          | y      |
| 1777 | Dortmund  | 3000                    | 1.068           | 1.34      | 0.77      | 4         | 4         | 0.3       | 0:07:28  | 0.0  | y          | y      |
| 1778 | Kassel    | 3000                    | 1.059           | 1.34      | 0.77      | 4         | 4         | 0.3       | 0:19:53  | 0.0  | y          | y      |
| 1779 | Hannover  | 3000                    | 1.128           | 1.34      | 0.77      | 4         | 4         | 0.46      | 1:03:55  | 0.0  | y          | y      |
| 1780 | Krefeld   | 3000                    | 1.091           | 1.34      | 0.77      | 4         | 4         | 0.43      | 2:18:10  | 0.0  | y          | y      |
| 1781 | Münster   | 3000                    | 1.065           | 1.34      | 0.77      | 4         | 4         | 0.36      | 0:18:00  | 0.0  | y          | y      |
| 1782 | Paderborn | 3000                    | 1.047           | 1.34      | 0.77      | 4         | 4         | 0.35      | 0:06:14  | 0.0  | n          | y      |
| 1783 | Detmold   | 3000                    | 1.052           | 1.34      | 0.77      | 4         | 4         | 0.35      | 0:20:09  | 0.0  | y          | y      |
| 1784 | Bielefeld | 3000                    | 1.046           | 1.34      | 0.77      | 4         | 4         | 0.4       | 16:27:46 | 0.0  | y          | y      |
| 1785 | Gütersloh | 3000                    | 1.065           | 1.34      | 0.77      | 4         | 4         | 0.41      | 3:18:40  | 0.0  | y          | y      |
| 1786 | Soest     | 3000                    | 1.054           | 1.34      | 0.77      | 4         | 4         | 0.38      | 1:40:40  | 0.0  | y          | y      |
| 1787 | Dortmund  | 3000                    | 1.068           | 1.34      | 0.77      | 4         | 4         | 0.38      | *        | *    | *          | *      |
| 1788 | Kassel    | 3000                    | 1.059           | 1.34      | 0.77      | 4         | 4         | 0.35      | 0:08:10  | 0.0  | y          | y      |
| 1789 | Hannover  | 3000                    | 1.128           | 1.34      | 0.77      | 4         | 4         | 0.44      | *        | *    | *          | *      |
| 1790 | Krefeld   | 3000                    | 1.091           | 1.34      | 0.77      | 4         | 4         | 0.38      | *        | *    | *          | *      |
| 1791 | Münster   | 3000                    | 1.065           | 1.34      | 0.77      | 4         | 4         | 0.42      | 16:48:17 | 0.32 | y          | y      |
| 1792 | Paderborn | 3000                    | 1.047           | 1.34      | 0.77      | 4         | 4         | 0.44      | 9:34:55  | 0.0  | y          | y      |
| 1793 | Detmold   | 3000                    | 1.052           | 1.34      | 0.77      | 4         | 4         | 0.42      | *        | *    | *          | *      |
| 1794 | Bielefeld | 3000                    | 1.046           | 1.34      | 0.77      | 4         | 4         | 0.46      | *        | *    | *          | *      |
| 1795 | Gütersloh | 3000                    | 1.066           | 1.34      | 0.77      | 4         | 4         | 0.45      | *        | *    | *          | *      |
| 1796 | Soest     | 3000                    | 1.054           | 1.34      | 0.77      | 4         | 4         | 0.42      | 10:58:43 | 0.0  | y          | y      |
| 1797 | Dortmund  | 3000                    | 1.068           | 1.34      | 0.77      | 4         | 4         | 0.43      | *        | *    | *          | *      |
| 1798 | Kassel    | 3000                    | 1.059           | 1.34      | 0.77      | 4         | 4         | 0.4       | 0:19:58  | 0.0  | y          | y      |
| 1799 | Hannover  | 3000                    | 1.128           | 1.34      | 0.77      | 4         | 4         | 0.46      | *        | *    | *          | *      |
| 1800 | Krefeld   | 3000                    | 1.091           | 1.34      | 0.77      | 4         | 4         | 0.48      | *        | *    | *          | *      |
| 1801 | Münster   | 3000                    | 1.065           | 1.0       | 0.77      | 2         | 2         | 0.26      | 0:03:46  | 0.0  | y          | y      |
| 1802 | Paderborn | 3000                    | 1.047           | 1.0       | 0.77      | 2         | 2         | 0.28      | 0:03:26  | 0.0  | y          | y      |
| 1803 | Detmold   | 3000                    | 1.052           | 1.0       | 0.77      | 2         | 2         | 0.27      | 0:04:45  | 0.0  | y          | y      |
| 1804 | Bielefeld | 3000                    | 1.046           | 1.0       | 0.77      | 2         | 2         | 0.26      | 0:04:16  | 0.0  | y          | y      |
| 1805 | Gütersloh | 3000                    | 1.065           | 1.0       | 0.77      | 2         | 2         | 0.31      | 0:06:32  | 0.0  | y          | y      |

| #    | Network characteristics |           |                  |           |           |           |           |           | Solution |      | Simulation |        |
|------|-------------------------|-----------|------------------|-----------|-----------|-----------|-----------|-----------|----------|------|------------|--------|
|      | <i>cn</i>               | <i>bu</i> | $\frac{n_l}{bu}$ | <i>lf</i> | <i>tr</i> | <i>lt</i> | <i>tt</i> | <i>as</i> | Time     | Gap  | Volt       | Ampere |
| 1806 | Soest                   | 3000      | 1.054            | 1.0       | 0.77      | 2         | 2         | 0.26      | 0:03:04  | 0.0  | y          | y      |
| 1807 | Dortmund                | 3000      | 1.068            | 1.0       | 0.77      | 2         | 2         | 0.26      | 0:04:38  | 0.0  | y          | y      |
| 1808 | Kassel                  | 3000      | 1.059            | 1.0       | 0.77      | 2         | 2         | 0.25      | 0:02:35  | 0.0  | y          | y      |
| 1809 | Hannover                | 3000      | 1.128            | 1.0       | 0.77      | 2         | 2         | 0.4       | 0:14:19  | 0.0  | y          | y      |
| 1810 | Krefeld                 | 3000      | 1.091            | 1.0       | 0.77      | 2         | 2         | 0.37      | 0:12:44  | 0.0  | y          | y      |
| 1811 | Münster                 | 3000      | 1.065            | 1.0       | 0.77      | 2         | 2         | 0.31      | 0:03:12  | 0.0  | y          | y      |
| 1812 | Paderborn               | 3000      | 1.047            | 1.0       | 0.77      | 2         | 2         | 0.31      | 0:05:19  | 0.15 | y          | y      |
| 1813 | Detmold                 | 3000      | 1.051            | 1.0       | 0.77      | 2         | 2         | 0.32      | 0:22:39  | 0.0  | y          | y      |
| 1814 | Bielefeld               | 3000      | 1.046            | 1.0       | 0.77      | 2         | 2         | 0.34      | 0:06:31  | 0.0  | y          | y      |
| 1815 | Gütersloh               | 3000      | 1.066            | 1.0       | 0.77      | 2         | 2         | 0.38      | 0:10:19  | 0.0  | y          | y      |
| 1816 | Soest                   | 3000      | 1.054            | 1.0       | 0.77      | 2         | 2         | 0.34      | 1:03:53  | 0.42 | y          | y      |
| 1817 | Dortmund                | 3000      | 1.068            | 1.0       | 0.77      | 2         | 2         | 0.36      | 0:02:55  | 0.0  | y          | y      |
| 1818 | Kassel                  | 3000      | 1.059            | 1.0       | 0.77      | 2         | 2         | 0.3       | 0:02:56  | 0.0  | y          | y      |
| 1819 | Hannover                | 3000      | 1.128            | 1.0       | 0.77      | 2         | 2         | 0.38      | 0:17:11  | 0.0  | y          | y      |
| 1820 | Krefeld                 | 3000      | 1.091            | 1.0       | 0.77      | 2         | 2         | 0.34      | 0:32:53  | 0.0  | y          | y      |
| 1821 | Münster                 | 3000      | 1.065            | 1.0       | 0.77      | 2         | 2         | 0.38      | 0:27:12  | 0.0  | y          | y      |
| 1822 | Paderborn               | 3000      | 1.047            | 1.0       | 0.77      | 2         | 2         | 0.4       | 1:04:26  | 0.0  | y          | y      |
| 1823 | Detmold                 | 3000      | 1.052            | 1.0       | 0.77      | 2         | 2         | 0.38      | 0:30:36  | 0.2  | y          | y      |
| 1824 | Bielefeld               | 3000      | 1.046            | 1.0       | 0.77      | 2         | 2         | 0.4       | 0:34:58  | 0.0  | y          | y      |
| 1825 | Gütersloh               | 3000      | 1.065            | 1.0       | 0.77      | 2         | 2         | 0.39      | 10:23:48 | 0.39 | y          | y      |
| 1826 | Soest                   | 3000      | 1.054            | 1.0       | 0.77      | 2         | 2         | 0.41      | 0:06:44  | 0.0  | y          | y      |
| 1827 | Dortmund                | 3000      | 1.068            | 1.0       | 0.77      | 2         | 2         | 0.38      | 0:07:40  | 0.35 | y          | y      |
| 1828 | Kassel                  | 3000      | 1.059            | 1.0       | 0.77      | 2         | 2         | 0.36      | 0:07:26  | 0.0  | y          | y      |
| 1829 | Hannover                | 3000      | 1.129            | 1.0       | 0.77      | 2         | 2         | 0.38      | 0:23:02  | 0.0  | y          | y      |
| 1830 | Krefeld                 | 3000      | 1.092            | 1.0       | 0.77      | 2         | 2         | 0.39      | 0:32:27  | 0.0  | y          | y      |
| 1831 | Münster                 | 3000      | 1.065            | 1.0       | 0.77      | 3         | 3         | 0.33      | 0:05:23  | 0.0  | y          | y      |
| 1832 | Paderborn               | 3000      | 1.047            | 1.0       | 0.77      | 3         | 3         | 0.31      | 0:19:34  | 0.0  | y          | y      |
| 1833 | Detmold                 | 3000      | 1.052            | 1.0       | 0.77      | 3         | 3         | 0.3       | 0:24:50  | 0.0  | y          | y      |
| 1834 | Bielefeld               | 3000      | 1.046            | 1.0       | 0.77      | 3         | 3         | 0.29      | 0:24:10  | 0.0  | y          | y      |
| 1835 | Gütersloh               | 3000      | 1.065            | 1.0       | 0.77      | 3         | 3         | 0.34      | 0:10:21  | 0.0  | y          | y      |
| 1836 | Soest                   | 3000      | 1.054            | 1.0       | 0.77      | 3         | 3         | 0.27      | 0:05:18  | 0.0  | y          | y      |
| 1837 | Dortmund                | 3000      | 1.068            | 1.0       | 0.77      | 3         | 3         | 0.29      | 0:10:00  | 0.0  | y          | y      |
| 1838 | Kassel                  | 3000      | 1.059            | 1.0       | 0.77      | 3         | 3         | 0.28      | 0:05:25  | 0.0  | y          | y      |
| 1839 | Hannover                | 3000      | 1.128            | 1.0       | 0.77      | 3         | 3         | 0.44      | 0:57:39  | 0.0  | y          | y      |
| 1840 | Krefeld                 | 3000      | 1.091            | 1.0       | 0.77      | 3         | 3         | 0.3       | *        | *    | *          | *      |
| 1841 | Münster                 | 3000      | 1.065            | 1.0       | 0.77      | 3         | 3         | 0.33      | 0:12:40  | 0.0  | y          | y      |
| 1842 | Paderborn               | 3000      | 1.047            | 1.0       | 0.77      | 3         | 3         | 0.33      | 1:39:51  | 0.34 | y          | y      |
| 1843 | Detmold                 | 3000      | 1.052            | 1.0       | 0.77      | 3         | 3         | 0.33      | 0:06:27  | 0.0  | y          | y      |
| 1844 | Bielefeld               | 3000      | 1.046            | 1.0       | 0.77      | 3         | 3         | 0.36      | 0:16:21  | 0.0  | y          | y      |
| 1845 | Gütersloh               | 3000      | 1.065            | 1.0       | 0.77      | 3         | 3         | 0.37      | 0:45:42  | 0.0  | y          | y      |
| 1846 | Soest                   | 3000      | 1.054            | 1.0       | 0.77      | 3         | 3         | 0.37      | 5:46:33  | 0.26 | y          | y      |
| 1847 | Dortmund                | 3000      | 1.068            | 1.0       | 0.77      | 3         | 3         | 0.36      | 0:40:46  | 0.0  | y          | y      |
| 1848 | Kassel                  | 3000      | 1.059            | 1.0       | 0.77      | 3         | 3         | 0.33      | 0:21:23  | 0.0  | y          | y      |
| 1849 | Hannover                | 3000      | 1.128            | 1.0       | 0.77      | 3         | 3         | 0.42      | 0:09:22  | 0.0  | y          | y      |
| 1850 | Krefeld                 | 3000      | 1.091            | 1.0       | 0.77      | 3         | 3         | 0.36      | *        | *    | *          | *      |
| 1851 | Münster                 | 3000      | 1.065            | 1.0       | 0.77      | 3         | 3         | 0.4       | 3:45:14  | 0.0  | y          | y      |
| 1852 | Paderborn               | 3000      | 1.047            | 1.0       | 0.77      | 3         | 3         | 0.42      | 3:46:59  | 0.0  | y          | y      |
| 1853 | Detmold                 | 3000      | 1.052            | 1.0       | 0.77      | 3         | 3         | 0.4       | 6:54:20  | 0.0  | y          | y      |
| 1854 | Bielefeld               | 3000      | 1.046            | 1.0       | 0.77      | 3         | 3         | 0.42      | 0:13:01  | 0.0  | y          | y      |
| 1855 | Gütersloh               | 3000      | 1.065            | 1.0       | 0.77      | 3         | 3         | 0.42      | *        | *    | *          | *      |
| 1856 | Soest                   | 3000      | 1.054            | 1.0       | 0.77      | 3         | 3         | 0.4       | 3:35:15  | 0.24 | y          | y      |
| 1857 | Dortmund                | 3000      | 1.068            | 1.0       | 0.77      | 3         | 3         | 0.42      | 10:54:20 | 0.0  | y          | y      |

| #    | Network characteristics |           |                 |           |           |           |           | Solution  |          | Simulation |      |        |
|------|-------------------------|-----------|-----------------|-----------|-----------|-----------|-----------|-----------|----------|------------|------|--------|
|      | <i>cn</i>               | <i>bu</i> | $\frac{nl}{bu}$ | <i>lf</i> | <i>tr</i> | <i>lt</i> | <i>tt</i> | <i>as</i> | Time     | Gap        | Volt | Ampere |
| 1858 | Kassel                  | 3000      | 1.059           | 1.0       | 0.77      | 3         | 3         | 0.38      | 0:09:30  | 0.0        | y    | y      |
| 1859 | Hannover                | 3000      | 1.128           | 1.0       | 0.77      | 3         | 3         | 0.44      | 1:26:39  | 0.0        | y    | y      |
| 1860 | Krefeld                 | 3000      | 1.091           | 1.0       | 0.77      | 3         | 3         | 0.46      | 0:16:29  | 0.0        | y    | y      |
| 1861 | Münster                 | 3000      | 1.065           | 1.0       | 0.77      | 4         | 4         | 0.31      | 0:07:32  | 0.0        | y    | y      |
| 1862 | Paderborn               | 3000      | 1.047           | 1.0       | 0.77      | 4         | 4         | 0.33      | 0:05:31  | 0.0        | y    | y      |
| 1863 | Detmold                 | 3000      | 1.052           | 1.0       | 0.77      | 4         | 4         | 0.32      | 0:25:23  | 0.0        | y    | y      |
| 1864 | Bielefeld               | 3000      | 1.046           | 1.0       | 0.77      | 4         | 4         | 0.31      | 0:07:39  | 0.0        | y    | y      |
| 1865 | Gütersloh               | 3000      | 1.066           | 1.0       | 0.77      | 4         | 4         | 0.35      | 0:24:28  | 0.0        | y    | y      |
| 1866 | Soest                   | 3000      | 1.054           | 1.0       | 0.77      | 4         | 4         | 0.36      | 0:03:36  | 0.0        | y    | y      |
| 1867 | Dortmund                | 3000      | 1.068           | 1.0       | 0.77      | 4         | 4         | 0.3       | 0:31:51  | 0.0        | y    | y      |
| 1868 | Kassel                  | 3000      | 1.059           | 1.0       | 0.77      | 4         | 4         | 0.3       | 0:03:32  | 0.0        | y    | y      |
| 1869 | Hannover                | 3000      | 1.129           | 1.0       | 0.77      | 4         | 4         | 0.34      | 0:23:18  | 0.0        | y    | y      |
| 1870 | Krefeld                 | 3000      | 1.091           | 1.0       | 0.77      | 4         | 4         | 0.43      | 0:37:45  | 0.0        | y    | y      |
| 1871 | Münster                 | 3000      | 1.065           | 1.0       | 0.77      | 4         | 4         | 0.36      | 0:08:21  | 0.0        | y    | y      |
| 1872 | Paderborn               | 3000      | 1.047           | 1.0       | 0.77      | 4         | 4         | 0.35      | 1:33:49  | 0.15       | y    | y      |
| 1873 | Detmold                 | 3000      | 1.052           | 1.0       | 0.77      | 4         | 4         | 0.35      | 0:28:29  | 0.15       | y    | y      |
| 1874 | Bielefeld               | 3000      | 1.046           | 1.0       | 0.77      | 4         | 4         | 0.39      | 0:18:52  | 0.0        | y    | y      |
| 1875 | Gütersloh               | 3000      | 1.065           | 1.0       | 0.77      | 4         | 4         | 0.41      | 4:16:28  | 0.0        | y    | y      |
| 1876 | Soest                   | 3000      | 1.054           | 1.0       | 0.77      | 4         | 4         | 0.39      | 9:06:30  | 0.04       | y    | y      |
| 1877 | Dortmund                | 3000      | 1.068           | 1.0       | 0.77      | 4         | 4         | 0.38      | 4:40:35  | 0.0        | y    | y      |
| 1878 | Kassel                  | 3000      | 1.059           | 1.0       | 0.77      | 4         | 4         | 0.35      | 0:30:46  | 0.0        | y    | y      |
| 1879 | Hannover                | 3000      | 1.128           | 1.0       | 0.77      | 4         | 4         | 0.44      | 0:50:10  | 0.0        | y    | y      |
| 1880 | Krefeld                 | 3000      | 1.092           | 1.0       | 0.77      | 4         | 4         | 0.38      | 9:15:16  | 0.0        | y    | y      |
| 1881 | Münster                 | 3000      | 1.065           | 1.0       | 0.77      | 4         | 4         | 0.42      | 2:54:12  | 0.0        | y    | y      |
| 1882 | Paderborn               | 3000      | 1.047           | 1.0       | 0.77      | 4         | 4         | 0.44      | 3:56:08  | 0.23       | y    | y      |
| 1883 | Detmold                 | 3000      | 1.051           | 1.0       | 0.77      | 4         | 4         | 0.43      | 0:30:57  | 0.0        | y    | y      |
| 1884 | Bielefeld               | 3000      | 1.046           | 1.0       | 0.77      | 4         | 4         | 0.44      | 3:26:07  | 0.0        | y    | y      |
| 1885 | Gütersloh               | 3000      | 1.065           | 1.0       | 0.77      | 4         | 4         | 0.44      | *        | *          | *    | *      |
| 1886 | Soest                   | 3000      | 1.054           | 1.0       | 0.77      | 4         | 4         | 0.46      | 0:53:54  | 0.0        | y    | y      |
| 1887 | Dortmund                | 3000      | 1.068           | 1.0       | 0.77      | 4         | 4         | 0.43      | 16:44:12 | 0.0        | y    | y      |
| 1888 | Kassel                  | 3000      | 1.059           | 1.0       | 0.77      | 4         | 4         | 0.4       | 0:10:33  | 0.13       | y    | y      |
| 1889 | Hannover                | 3000      | 1.128           | 1.0       | 0.77      | 4         | 4         | 0.46      | 6:14:26  | 0.0        | y    | y      |
| 1890 | Krefeld                 | 3000      | 1.092           | 1.0       | 0.77      | 4         | 4         | 0.44      | *        | *          | *    | *      |
| 1891 | Münster                 | 3000      | 1.067           | 0.83      | 1.0       | 2         | 2         | 0.31      | 0:02:55  | 0.0        | y    | y      |
| 1892 | Paderborn               | 3000      | 1.049           | 0.83      | 1.0       | 2         | 2         | 0.22      | 0:12:37  | 0.0        | y    | y      |
| 1893 | Detmold                 | 3000      | 1.054           | 0.83      | 1.0       | 2         | 2         | 0.31      | 0:09:44  | 0.0        | y    | y      |
| 1894 | Bielefeld               | 3000      | 1.047           | 0.83      | 1.0       | 2         | 2         | 0.25      | 0:06:28  | 0.0        | y    | y      |
| 1895 | Gütersloh               | 3000      | 1.066           | 0.83      | 1.0       | 2         | 2         | 0.26      | 0:13:43  | 0.0        | y    | y      |
| 1896 | Soest                   | 3000      | 1.056           | 0.83      | 1.0       | 2         | 2         | 0.25      | 0:02:34  | 0.0        | y    | y      |
| 1897 | Dortmund                | 3000      | 1.068           | 0.83      | 1.0       | 2         | 2         | 0.32      | 0:03:43  | 0.0        | y    | y      |
| 1898 | Kassel                  | 3000      | 1.061           | 0.83      | 1.0       | 2         | 2         | 0.25      | 0:03:20  | 0.0        | y    | y      |
| 1899 | Hannover                | 3000      | 1.129           | 0.83      | 1.0       | 2         | 2         | 0.29      | 0:26:33  | 0.0        | y    | y      |
| 1900 | Krefeld                 | 3000      | 1.093           | 0.83      | 1.0       | 2         | 2         | 0.32      | 0:16:46  | 0.0        | y    | y      |
| 1901 | Münster                 | 3000      | 1.067           | 0.83      | 1.0       | 2         | 2         | 0.33      | 0:05:02  | 0.0        | y    | y      |
| 1902 | Paderborn               | 3000      | 1.049           | 0.83      | 1.0       | 2         | 2         | 0.3       | 0:14:10  | 0.0        | y    | y      |
| 1903 | Detmold                 | 3000      | 1.054           | 0.83      | 1.0       | 2         | 2         | 0.34      | 0:19:07  | 0.0        | y    | y      |
| 1904 | Bielefeld               | 3000      | 1.047           | 0.83      | 1.0       | 2         | 2         | 0.29      | 0:09:25  | 0.18       | y    | y      |
| 1905 | Gütersloh               | 3000      | 1.066           | 0.83      | 1.0       | 2         | 2         | 0.29      | 0:22:21  | 0.0        | y    | y      |
| 1906 | Soest                   | 3000      | 1.056           | 0.83      | 1.0       | 2         | 2         | 0.32      | 0:11:30  | 0.0        | y    | y      |
| 1907 | Dortmund                | 3000      | 1.069           | 0.83      | 1.0       | 2         | 2         | 0.31      | 0:05:34  | 0.0        | y    | y      |
| 1908 | Kassel                  | 3000      | 1.061           | 0.83      | 1.0       | 2         | 2         | 0.33      | 0:16:55  | 0.0        | y    | y      |
| 1909 | Hannover                | 3000      | 1.129           | 0.83      | 1.0       | 2         | 2         | 0.35      | 0:34:51  | 0.0        | y    | y      |

| #    | Network characteristics |           |                  |           |           |           |           |           | Solution |      | Simulation |        |
|------|-------------------------|-----------|------------------|-----------|-----------|-----------|-----------|-----------|----------|------|------------|--------|
|      | <i>cn</i>               | <i>bu</i> | $\frac{n_l}{bu}$ | <i>lf</i> | <i>tr</i> | <i>lt</i> | <i>tt</i> | <i>as</i> | Time     | Gap  | Volt       | Ampere |
| 1910 | Krefeld                 | 3000      | 1.093            | 0.83      | 1.0       | 2         | 2         | 0.34      | 0:24:39  | 0.0  | y          | y      |
| 1911 | Münster                 | 3000      | 1.067            | 0.83      | 1.0       | 2         | 2         | 0.38      | 0:17:34  | 0.0  | y          | y      |
| 1912 | Paderborn               | 3000      | 1.049            | 0.83      | 1.0       | 2         | 2         | 0.37      | 0:53:00  | 0.0  | y          | y      |
| 1913 | Detmold                 | 3000      | 1.054            | 0.83      | 1.0       | 2         | 2         | 0.42      | 0:16:40  | 0.1  | y          | y      |
| 1914 | Bielefeld               | 3000      | 1.047            | 0.83      | 1.0       | 2         | 2         | 0.35      | *        | *    | *          | *      |
| 1915 | Gütersloh               | 3000      | 1.066            | 0.83      | 1.0       | 2         | 2         | 0.38      | 14:18:18 | 0.23 | y          | y      |
| 1916 | Soest                   | 3000      | 1.056            | 0.83      | 1.0       | 2         | 2         | 0.39      | 0:17:36  | 0.0  | y          | y      |
| 1917 | Dortmund                | 3000      | 1.069            | 0.83      | 1.0       | 2         | 2         | 0.37      | 0:06:30  | 0.0  | y          | y      |
| 1918 | Kassel                  | 3000      | 1.061            | 0.83      | 1.0       | 2         | 2         | 0.37      | 0:09:44  | 0.0  | y          | y      |
| 1919 | Hannover                | 3000      | 1.129            | 0.83      | 1.0       | 2         | 2         | 0.37      | 1:53:04  | 0.0  | y          | y      |
| 1920 | Krefeld                 | 3000      | 1.092            | 0.83      | 1.0       | 2         | 2         | 0.37      | 2:09:09  | 0.0  | y          | y      |
| 1921 | Münster                 | 3000      | 1.067            | 0.83      | 1.0       | 3         | 3         | 0.35      | 0:03:48  | 0.0  | y          | y      |
| 1922 | Paderborn               | 3000      | 1.050            | 0.83      | 1.0       | 3         | 3         | 0.25      | 0:03:08  | 0.0  | y          | y      |
| 1923 | Detmold                 | 3000      | 1.054            | 0.83      | 1.0       | 3         | 3         | 0.34      | 0:06:41  | 0.0  | y          | y      |
| 1924 | Bielefeld               | 3000      | 1.047            | 0.83      | 1.0       | 3         | 3         | 0.27      | 0:04:45  | 0.0  | y          | y      |
| 1925 | Gütersloh               | 3000      | 1.067            | 0.83      | 1.0       | 3         | 3         | 0.29      | 0:47:42  | 0.0  | y          | y      |
| 1926 | Soest                   | 3000      | 1.056            | 0.83      | 1.0       | 3         | 3         | 0.27      | 0:04:10  | 0.0  | y          | y      |
| 1927 | Dortmund                | 3000      | 1.069            | 0.83      | 1.0       | 3         | 3         | 0.4       | 0:06:44  | 0.0  | y          | y      |
| 1928 | Kassel                  | 3000      | 1.061            | 0.83      | 1.0       | 3         | 3         | 0.28      | 0:04:18  | 0.0  | y          | y      |
| 1929 | Hannover                | 3000      | 1.129            | 0.83      | 1.0       | 3         | 3         | 0.28      | 0:06:23  | 0.0  | y          | y      |
| 1930 | Krefeld                 | 3000      | 1.092            | 0.83      | 1.0       | 3         | 3         | 0.3       | 4:15:47  | 0.0  | y          | y      |
| 1931 | Münster                 | 3000      | 1.067            | 0.83      | 1.0       | 3         | 3         | 0.33      | 0:12:58  | 0.0  | y          | y      |
| 1932 | Paderborn               | 3000      | 1.050            | 0.83      | 1.0       | 3         | 3         | 0.33      | 0:09:01  | 0.0  | y          | y      |
| 1933 | Detmold                 | 3000      | 1.054            | 0.83      | 1.0       | 3         | 3         | 0.37      | 0:51:01  | 0.0  | y          | y      |
| 1934 | Bielefeld               | 3000      | 1.048            | 0.83      | 1.0       | 3         | 3         | 0.35      | 0:05:52  | 0.0  | y          | y      |
| 1935 | Gütersloh               | 3000      | 1.066            | 0.83      | 1.0       | 3         | 3         | 0.35      | *        | *    | *          | *      |
| 1936 | Soest                   | 3000      | 1.056            | 0.83      | 1.0       | 3         | 3         | 0.33      | 0:53:22  | 0.0  | y          | y      |
| 1937 | Dortmund                | 3000      | 1.069            | 0.83      | 1.0       | 3         | 3         | 0.34      | 1:08:37  | 0.0  | y          | y      |
| 1938 | Kassel                  | 3000      | 1.061            | 0.83      | 1.0       | 3         | 3         | 0.35      | 0:10:08  | 0.0  | y          | y      |
| 1939 | Hannover                | 3000      | 1.129            | 0.83      | 1.0       | 3         | 3         | 0.38      | 0:36:15  | 0.0  | y          | y      |
| 1940 | Krefeld                 | 3000      | 1.092            | 0.83      | 1.0       | 3         | 3         | 0.39      | 6:22:21  | 0.32 | y          | y      |
| 1941 | Münster                 | 3000      | 1.067            | 0.83      | 1.0       | 3         | 3         | 0.4       | 0:14:49  | 0.0  | y          | y      |
| 1942 | Paderborn               | 3000      | 1.049            | 0.83      | 1.0       | 3         | 3         | 0.39      | 3:23:18  | 0.0  | n          | y      |
| 1943 | Detmold                 | 3000      | 1.054            | 0.83      | 1.0       | 3         | 3         | 0.44      | 1:23:40  | 0.0  | y          | y      |
| 1944 | Bielefeld               | 3000      | 1.048            | 0.83      | 1.0       | 3         | 3         | 0.41      | 1:19:28  | 0.0  | y          | y      |
| 1945 | Gütersloh               | 3000      | 1.066            | 0.83      | 1.0       | 3         | 3         | 0.39      | *        | *    | *          | *      |
| 1946 | Soest                   | 3000      | 1.056            | 0.83      | 1.0       | 3         | 3         | 0.39      | 2:50:13  | 0.0  | y          | y      |
| 1947 | Dortmund                | 3000      | 1.069            | 0.83      | 1.0       | 3         | 3         | 0.39      | 1:13:20  | 0.0  | y          | y      |
| 1948 | Kassel                  | 3000      | 1.061            | 0.83      | 1.0       | 3         | 3         | 0.39      | 0:12:06  | 0.0  | y          | y      |
| 1949 | Hannover                | 3000      | 1.129            | 0.83      | 1.0       | 3         | 3         | 0.41      | 0:43:54  | 0.0  | y          | y      |
| 1950 | Krefeld                 | 3000      | 1.092            | 0.83      | 1.0       | 3         | 3         | 0.41      | *        | *    | *          | *      |
| 1951 | Münster                 | 3000      | 1.067            | 0.83      | 1.0       | 4         | 4         | 0.37      | 0:03:12  | 0.0  | y          | y      |
| 1952 | Paderborn               | 3000      | 1.049            | 0.83      | 1.0       | 4         | 4         | 0.27      | 0:07:38  | 0.0  | y          | y      |
| 1953 | Detmold                 | 3000      | 1.054            | 0.83      | 1.0       | 4         | 4         | 0.33      | 0:07:39  | 0.0  | y          | y      |
| 1954 | Bielefeld               | 3000      | 1.047            | 0.83      | 1.0       | 4         | 4         | 0.29      | 0:03:43  | 0.0  | y          | y      |
| 1955 | Gütersloh               | 3000      | 1.066            | 0.83      | 1.0       | 4         | 4         | 0.32      | 0:47:42  | 0.0  | y          | y      |
| 1956 | Soest                   | 3000      | 1.056            | 0.83      | 1.0       | 4         | 4         | 0.33      | 0:03:07  | 0.44 | y          | y      |
| 1957 | Dortmund                | 3000      | 1.068            | 0.83      | 1.0       | 4         | 4         | 0.38      | 0:14:46  | 0.0  | y          | y      |
| 1958 | Kassel                  | 3000      | 1.061            | 0.83      | 1.0       | 4         | 4         | 0.31      | 0:03:46  | 0.0  | y          | y      |
| 1959 | Hannover                | 3000      | 1.129            | 0.83      | 1.0       | 4         | 4         | 0.35      | 0:31:42  | 0.0  | y          | y      |
| 1960 | Krefeld                 | 3000      | 1.092            | 0.83      | 1.0       | 4         | 4         | 0.32      | 1:13:19  | 0.36 | y          | y      |
| 1961 | Münster                 | 3000      | 1.067            | 0.83      | 1.0       | 4         | 4         | 0.38      | 0:07:17  | 0.0  | y          | y      |

| #    | Network characteristics |           |                 |           |           |           |           |           | Solution |      | Simulation |        |
|------|-------------------------|-----------|-----------------|-----------|-----------|-----------|-----------|-----------|----------|------|------------|--------|
|      | <i>cn</i>               | <i>bu</i> | $\frac{nl}{bu}$ | <i>lf</i> | <i>tr</i> | <i>lt</i> | <i>tt</i> | <i>as</i> | Time     | Gap  | Volt       | Ampere |
| 1962 | Paderborn               | 3000      | 1.049           | 0.83      | 1.0       | 4         | 4         | 0.39      | 0:05:43  | 0.0  | y          | y      |
| 1963 | Detmold                 | 3000      | 1.054           | 0.83      | 1.0       | 4         | 4         | 0.39      | 0:15:26  | 0.0  | y          | y      |
| 1964 | Bielefeld               | 3000      | 1.047           | 0.83      | 1.0       | 4         | 4         | 0.32      | 0:18:45  | 0.0  | y          | y      |
| 1965 | Gütersloh               | 3000      | 1.066           | 0.83      | 1.0       | 4         | 4         | 0.33      | 0:37:55  | 0.0  | y          | y      |
| 1966 | Soest                   | 3000      | 1.056           | 0.83      | 1.0       | 4         | 4         | 0.36      | 0:25:39  | 0.0  | y          | y      |
| 1967 | Dortmund                | 3000      | 1.069           | 0.83      | 1.0       | 4         | 4         | 0.36      | 0:10:44  | 0.0  | y          | y      |
| 1968 | Kassel                  | 3000      | 1.061           | 0.83      | 1.0       | 4         | 4         | 0.38      | 1:51:01  | 0.0  | y          | y      |
| 1969 | Hannover                | 3000      | 1.129           | 0.83      | 1.0       | 4         | 4         | 0.4       | 0:31:15  | 0.0  | y          | y      |
| 1970 | Krefeld                 | 3000      | 1.092           | 0.83      | 1.0       | 4         | 4         | 0.33      | 4:03:43  | 0.0  | y          | y      |
| 1971 | Münster                 | 3000      | 1.067           | 0.83      | 1.0       | 4         | 4         | 0.42      | 0:14:34  | 0.0  | y          | y      |
| 1972 | Paderborn               | 3000      | 1.049           | 0.83      | 1.0       | 4         | 4         | 0.4       | 4:28:58  | 0.0  | y          | y      |
| 1973 | Detmold                 | 3000      | 1.054           | 0.83      | 1.0       | 4         | 4         | 0.46      | 3:18:32  | 0.0  | y          | y      |
| 1974 | Bielefeld               | 3000      | 1.047           | 0.83      | 1.0       | 4         | 4         | 0.38      | *        | *    | *          | *      |
| 1975 | Gütersloh               | 3000      | 1.066           | 0.83      | 1.0       | 4         | 4         | 0.4       | 16:26:11 | 0.0  | y          | y      |
| 1976 | Soest                   | 3000      | 1.056           | 0.83      | 1.0       | 4         | 4         | 0.42      | 1:12:12  | 0.0  | y          | y      |
| 1977 | Dortmund                | 3000      | 1.068           | 0.83      | 1.0       | 4         | 4         | 0.44      | 0:56:03  | 0.0  | y          | y      |
| 1978 | Kassel                  | 3000      | 1.061           | 0.83      | 1.0       | 4         | 4         | 0.41      | 0:32:21  | 0.0  | y          | y      |
| 1979 | Hannover                | 3000      | 1.129           | 0.83      | 1.0       | 4         | 4         | 0.43      | 1:14:31  | 0.2  | y          | y      |
| 1980 | Krefeld                 | 3000      | 1.093           | 0.83      | 1.0       | 4         | 4         | 0.41      | 0:21:25  | 0.0  | y          | y      |
| 1981 | Münster                 | 3000      | 1.067           | 1.34      | 1.0       | 2         | 2         | 0.31      | 0:03:41  | 0.0  | y          | y      |
| 1982 | Paderborn               | 3000      | 1.049           | 1.34      | 1.0       | 2         | 2         | 0.22      | 0:06:30  | 0.0  | y          | y      |
| 1983 | Detmold                 | 3000      | 1.054           | 1.34      | 1.0       | 2         | 2         | 0.31      | 0:07:01  | 0.0  | y          | y      |
| 1984 | Bielefeld               | 3000      | 1.047           | 1.34      | 1.0       | 2         | 2         | 0.25      | 0:14:58  | 0.0  | y          | y      |
| 1985 | Gütersloh               | 3000      | 1.066           | 1.34      | 1.0       | 2         | 2         | 0.27      | 0:12:46  | 0.0  | y          | y      |
| 1986 | Soest                   | 3000      | 1.056           | 1.34      | 1.0       | 2         | 2         | 0.33      | 0:02:11  | 0.0  | y          | y      |
| 1987 | Dortmund                | 3000      | 1.068           | 1.34      | 1.0       | 2         | 2         | 0.32      | 0:13:44  | 0.0  | y          | y      |
| 1988 | Kassel                  | 3000      | 1.061           | 1.34      | 1.0       | 2         | 2         | 0.25      | 0:34:20  | 0.0  | y          | y      |
| 1989 | Hannover                | 3000      | 1.129           | 1.34      | 1.0       | 2         | 2         | 0.29      | 0:20:19  | 0.0  | y          | y      |
| 1990 | Krefeld                 | 3000      | 1.092           | 1.34      | 1.0       | 2         | 2         | 0.27      | 3:20:14  | 0.0  | y          | y      |
| 1991 | Münster                 | 3000      | 1.067           | 1.34      | 1.0       | 2         | 2         | 0.33      | 0:14:54  | 0.0  | y          | y      |
| 1992 | Paderborn               | 3000      | 1.049           | 1.34      | 1.0       | 2         | 2         | 0.3       | 0:31:39  | 0.0  | y          | y      |
| 1993 | Detmold                 | 3000      | 1.054           | 1.34      | 1.0       | 2         | 2         | 0.34      | 1:18:35  | 0.47 | y          | y      |
| 1994 | Bielefeld               | 3000      | 1.047           | 1.34      | 1.0       | 2         | 2         | 0.29      | 0:20:29  | 0.0  | y          | y      |
| 1995 | Gütersloh               | 3000      | 1.066           | 1.34      | 1.0       | 2         | 2         | 0.29      | 0:08:42  | 0.32 | y          | y      |
| 1996 | Soest                   | 3000      | 1.056           | 1.34      | 1.0       | 2         | 2         | 0.32      | 0:14:09  | 0.29 | y          | y      |
| 1997 | Dortmund                | 3000      | 1.069           | 1.34      | 1.0       | 2         | 2         | 0.31      | 0:09:41  | 0.0  | y          | y      |
| 1998 | Kassel                  | 3000      | 1.061           | 1.34      | 1.0       | 2         | 2         | 0.33      | 0:09:28  | 0.0  | y          | y      |
| 1999 | Hannover                | 3000      | 1.129           | 1.34      | 1.0       | 2         | 2         | 0.35      | 0:33:18  | 0.0  | y          | y      |
| 2000 | Krefeld                 | 3000      | 1.092           | 1.34      | 1.0       | 2         | 2         | 0.29      | 0:24:51  | 0.0  | y          | y      |
| 2001 | Münster                 | 3000      | 1.067           | 1.34      | 1.0       | 2         | 2         | 0.38      | 0:59:54  | 0.02 | y          | y      |
| 2002 | Paderborn               | 3000      | 1.049           | 1.34      | 1.0       | 2         | 2         | 0.37      | 1:01:23  | 0.0  | n          | y      |
| 2003 | Detmold                 | 3000      | 1.054           | 1.34      | 1.0       | 2         | 2         | 0.42      | 0:31:00  | 0.0  | y          | y      |
| 2004 | Bielefeld               | 3000      | 1.048           | 1.34      | 1.0       | 2         | 2         | 0.38      | 0:11:47  | 0.0  | y          | y      |
| 2005 | Gütersloh               | 3000      | 1.066           | 1.34      | 1.0       | 2         | 2         | 0.37      | 13:12:48 | 0.0  | y          | y      |
| 2006 | Soest                   | 3000      | 1.056           | 1.34      | 1.0       | 2         | 2         | 0.41      | 0:21:30  | 0.0  | y          | y      |
| 2007 | Dortmund                | 3000      | 1.069           | 1.34      | 1.0       | 2         | 2         | 0.37      | 0:08:57  | 0.0  | y          | y      |
| 2008 | Kassel                  | 3000      | 1.061           | 1.34      | 1.0       | 2         | 2         | 0.37      | 1:31:03  | 0.0  | y          | y      |
| 2009 | Hannover                | 3000      | 1.129           | 1.34      | 1.0       | 2         | 2         | 0.4       | 0:45:50  | 0.0  | y          | y      |
| 2010 | Krefeld                 | 3000      | 1.092           | 1.34      | 1.0       | 2         | 2         | 0.39      | *        | *    | *          | *      |
| 2011 | Münster                 | 3000      | 1.067           | 1.34      | 1.0       | 3         | 3         | 0.35      | 0:04:31  | 0.0  | y          | y      |
| 2012 | Paderborn               | 3000      | 1.049           | 1.34      | 1.0       | 3         | 3         | 0.25      | 0:07:02  | 0.0  | y          | y      |
| 2013 | Detmold                 | 3000      | 1.054           | 1.34      | 1.0       | 3         | 3         | 0.34      | 1:32:51  | 0.0  | y          | y      |

| #    | Network characteristics |           |                 |           |           |           |           |           | Solution |      | Simulation |        |
|------|-------------------------|-----------|-----------------|-----------|-----------|-----------|-----------|-----------|----------|------|------------|--------|
|      | <i>cn</i>               | <i>bu</i> | $\frac{nl}{bu}$ | <i>lf</i> | <i>tr</i> | <i>lt</i> | <i>tt</i> | <i>as</i> | Time     | Gap  | Volt       | Ampere |
| 2014 | Bielefeld               | 3000      | 1.047           | 1.34      | 1.0       | 3         | 3         | 0.27      | 0:28:02  | 0.0  | y          | y      |
| 2015 | Gütersloh               | 3000      | 1.066           | 1.34      | 1.0       | 3         | 3         | 0.3       | 0:14:21  | 0.0  | y          | y      |
| 2016 | Soest                   | 3000      | 1.056           | 1.34      | 1.0       | 3         | 3         | 0.28      | 0:03:52  | 0.0  | y          | y      |
| 2017 | Dortmund                | 3000      | 1.069           | 1.34      | 1.0       | 3         | 3         | 0.4       | 0:11:45  | 0.0  | y          | y      |
| 2018 | Kassel                  | 3000      | 1.061           | 1.34      | 1.0       | 3         | 3         | 0.28      | 0:04:16  | 0.0  | y          | y      |
| 2019 | Hannover                | 3000      | 1.129           | 1.34      | 1.0       | 3         | 3         | 0.32      | 1:08:24  | 0.0  | y          | y      |
| 2020 | Krefeld                 | 3000      | 1.093           | 1.34      | 1.0       | 3         | 3         | 0.35      | 0:29:07  | 0.0  | y          | y      |
| 2021 | Münster                 | 3000      | 1.067           | 1.34      | 1.0       | 3         | 3         | 0.33      | 0:09:08  | 0.0  | y          | y      |
| 2022 | Paderborn               | 3000      | 1.049           | 1.34      | 1.0       | 3         | 3         | 0.32      | 2:14:54  | 0.04 | n          | y      |
| 2023 | Detmold                 | 3000      | 1.054           | 1.34      | 1.0       | 3         | 3         | 0.37      | 12:31:02 | 0.49 | n          | y      |
| 2024 | Bielefeld               | 3000      | 1.047           | 1.34      | 1.0       | 3         | 3         | 0.3       | 3:13:02  | 0.0  | y          | y      |
| 2025 | Gütersloh               | 3000      | 1.066           | 1.34      | 1.0       | 3         | 3         | 0.31      | 0:42:15  | 0.0  | y          | y      |
| 2026 | Soest                   | 3000      | 1.056           | 1.34      | 1.0       | 3         | 3         | 0.34      | 0:39:37  | 0.0  | y          | y      |
| 2027 | Dortmund                | 3000      | 1.069           | 1.34      | 1.0       | 3         | 3         | 0.32      | 0:32:44  | 0.0  | y          | y      |
| 2028 | Kassel                  | 3000      | 1.061           | 1.34      | 1.0       | 3         | 3         | 0.35      | 0:12:31  | 0.0  | y          | y      |
| 2029 | Hannover                | 3000      | 1.129           | 1.34      | 1.0       | 3         | 3         | 0.38      | 0:08:10  | 0.0  | y          | y      |
| 2030 | Krefeld                 | 3000      | 1.092           | 1.34      | 1.0       | 3         | 3         | 0.31      | 15:34:52 | 0.0  | y          | y      |
| 2031 | Münster                 | 3000      | 1.067           | 1.34      | 1.0       | 3         | 3         | 0.4       | 1:21:14  | 0.0  | y          | y      |
| 2032 | Paderborn               | 3000      | 1.049           | 1.34      | 1.0       | 3         | 3         | 0.39      | 3:36:01  | 0.0  | n          | y      |
| 2033 | Detmold                 | 3000      | 1.054           | 1.34      | 1.0       | 3         | 3         | 0.4       | *        | *    | *          | *      |
| 2034 | Bielefeld               | 3000      | 1.047           | 1.34      | 1.0       | 3         | 3         | 0.36      | *        | *    | *          | *      |
| 2035 | Gütersloh               | 3000      | 1.066           | 1.34      | 1.0       | 3         | 3         | 0.39      | *        | *    | *          | *      |
| 2036 | Soest                   | 3000      | 1.056           | 1.34      | 1.0       | 3         | 3         | 0.39      | 3:44:39  | 0.0  | y          | y      |
| 2037 | Dortmund                | 3000      | 1.069           | 1.34      | 1.0       | 3         | 3         | 0.39      | 0:10:28  | 0.0  | y          | y      |
| 2038 | Kassel                  | 3000      | 1.061           | 1.34      | 1.0       | 3         | 3         | 0.39      | 0:18:49  | 0.0  | y          | y      |
| 2039 | Hannover                | 3000      | 1.129           | 1.34      | 1.0       | 3         | 3         | 0.41      | *        | *    | *          | *      |
| 2040 | Krefeld                 | 3000      | 1.093           | 1.34      | 1.0       | 3         | 3         | 0.39      | 1:07:44  | 0.0  | y          | y      |
| 2041 | Münster                 | 3000      | 1.067           | 1.34      | 1.0       | 4         | 4         | 0.37      | 0:07:28  | 0.0  | y          | y      |
| 2042 | Paderborn               | 3000      | 1.049           | 1.34      | 1.0       | 4         | 4         | 0.27      | 0:31:30  | 0.0  | y          | y      |
| 2043 | Detmold                 | 3000      | 1.054           | 1.34      | 1.0       | 4         | 4         | 0.37      | 0:15:55  | 0.0  | y          | y      |
| 2044 | Bielefeld               | 3000      | 1.047           | 1.34      | 1.0       | 4         | 4         | 0.29      | 0:08:52  | 0.0  | y          | y      |
| 2045 | Gütersloh               | 3000      | 1.066           | 1.34      | 1.0       | 4         | 4         | 0.32      | 0:29:17  | 0.0  | y          | y      |
| 2046 | Soest                   | 3000      | 1.056           | 1.34      | 1.0       | 4         | 4         | 0.3       | 0:07:56  | 0.0  | y          | y      |
| 2047 | Dortmund                | 3000      | 1.069           | 1.34      | 1.0       | 4         | 4         | 0.42      | 0:04:57  | 0.0  | y          | y      |
| 2048 | Kassel                  | 3000      | 1.061           | 1.34      | 1.0       | 4         | 4         | 0.31      | 0:06:55  | 0.0  | y          | y      |
| 2049 | Hannover                | 3000      | 1.129           | 1.34      | 1.0       | 4         | 4         | 0.35      | 0:36:25  | 0.0  | y          | y      |
| 2050 | Krefeld                 | 3000      | 1.093           | 1.34      | 1.0       | 4         | 4         | 0.38      | 2:05:34  | 0.0  | y          | y      |
| 2051 | Münster                 | 3000      | 1.067           | 1.34      | 1.0       | 4         | 4         | 0.35      | 0:14:22  | 0.0  | y          | y      |
| 2052 | Paderborn               | 3000      | 1.049           | 1.34      | 1.0       | 4         | 4         | 0.34      | 10:49:23 | 0.0  | n          | y      |
| 2053 | Detmold                 | 3000      | 1.054           | 1.34      | 1.0       | 4         | 4         | 0.39      | 48:00:01 | 2.4  | y          | y      |
| 2054 | Bielefeld               | 3000      | 1.048           | 1.34      | 1.0       | 4         | 4         | 0.37      | 0:49:55  | 0.04 | y          | y      |
| 2055 | Gütersloh               | 3000      | 1.066           | 1.34      | 1.0       | 4         | 4         | 0.38      | *        | *    | *          | *      |
| 2056 | Soest                   | 3000      | 1.056           | 1.34      | 1.0       | 4         | 4         | 0.36      | 0:35:13  | 0.0  | y          | y      |
| 2057 | Dortmund                | 3000      | 1.068           | 1.34      | 1.0       | 4         | 4         | 0.39      | 0:06:34  | 0.0  | y          | y      |
| 2058 | Kassel                  | 3000      | 1.061           | 1.34      | 1.0       | 4         | 4         | 0.38      | 0:37:05  | 0.0  | y          | y      |
| 2059 | Hannover                | 3000      | 1.129           | 1.34      | 1.0       | 4         | 4         | 0.4       | 0:39:16  | 0.0  | y          | y      |
| 2060 | Krefeld                 | 3000      | 1.092           | 1.34      | 1.0       | 4         | 4         | 0.33      | *        | *    | *          | *      |
| 2061 | Münster                 | 3000      | 1.067           | 1.34      | 1.0       | 4         | 4         | 0.42      | 8:19:01  | 0.5  | y          | y      |
| 2062 | Paderborn               | 3000      | 1.049           | 1.34      | 1.0       | 4         | 4         | 0.4       | *        | *    | *          | *      |
| 2063 | Detmold                 | 3000      | 1.054           | 1.34      | 1.0       | 4         | 4         | 0.46      | 12:37:04 | 0.31 | y          | y      |
| 2064 | Bielefeld               | 3000      | 1.048           | 1.34      | 1.0       | 4         | 4         | 0.41      | 5:04:09  | 0.0  | y          | y      |
| 2065 | Gütersloh               | 3000      | 1.066           | 1.34      | 1.0       | 4         | 4         | 0.4       | *        | *    | *          | *      |

| #    | Network characteristics |           |                 |           |           |           |           |           | Solution |      | Simulation |        |
|------|-------------------------|-----------|-----------------|-----------|-----------|-----------|-----------|-----------|----------|------|------------|--------|
|      | <i>cn</i>               | <i>bu</i> | $\frac{nI}{bu}$ | <i>lf</i> | <i>tr</i> | <i>lt</i> | <i>tt</i> | <i>as</i> | Time     | Gap  | Volt       | Ampere |
| 2066 | Soest                   | 3000      | 1.056           | 1.34      | 1.0       | 4         | 4         | 0.42      | *        | *    | *          | *      |
| 2067 | Dortmund                | 3000      | 1.069           | 1.34      | 1.0       | 4         | 4         | 0.41      | 0:31:26  | 0.0  | y          | y      |
| 2068 | Kassel                  | 3000      | 1.061           | 1.34      | 1.0       | 4         | 4         | 0.41      | 0:15:46  | 0.28 | y          | y      |
| 2069 | Hannover                | 3000      | 1.129           | 1.34      | 1.0       | 4         | 4         | 0.43      | *        | *    | *          | *      |
| 2070 | Krefeld                 | 3000      | 1.092           | 1.34      | 1.0       | 4         | 4         | 0.43      | *        | *    | *          | *      |
| 2071 | Münster                 | 3000      | 1.067           | 1.0       | 1.0       | 2         | 2         | 0.31      | 0:05:41  | 0.0  | y          | y      |
| 2072 | Paderborn               | 3000      | 1.049           | 1.0       | 1.0       | 2         | 2         | 0.22      | 0:03:04  | 0.0  | y          | y      |
| 2073 | Detmold                 | 3000      | 1.054           | 1.0       | 1.0       | 2         | 2         | 0.27      | 0:03:03  | 0.0  | y          | y      |
| 2074 | Bielefeld               | 3000      | 1.047           | 1.0       | 1.0       | 2         | 2         | 0.25      | 0:03:29  | 0.0  | y          | y      |
| 2075 | Gütersloh               | 3000      | 1.066           | 1.0       | 1.0       | 2         | 2         | 0.27      | 0:06:31  | 0.0  | y          | y      |
| 2076 | Soest                   | 3000      | 1.056           | 1.0       | 1.0       | 2         | 2         | 0.25      | 0:02:59  | 0.0  | y          | y      |
| 2077 | Dortmund                | 3000      | 1.069           | 1.0       | 1.0       | 2         | 2         | 0.36      | 0:03:44  | 0.0  | y          | y      |
| 2078 | Kassel                  | 3000      | 1.061           | 1.0       | 1.0       | 2         | 2         | 0.25      | 0:05:07  | 0.0  | y          | y      |
| 2079 | Hannover                | 3000      | 1.129           | 1.0       | 1.0       | 2         | 2         | 0.29      | 0:22:51  | 0.0  | y          | y      |
| 2080 | Krefeld                 | 3000      | 1.093           | 1.0       | 1.0       | 2         | 2         | 0.3       | 0:21:37  | 0.0  | y          | y      |
| 2081 | Münster                 | 3000      | 1.067           | 1.0       | 1.0       | 2         | 2         | 0.33      | 0:04:49  | 0.0  | y          | y      |
| 2082 | Paderborn               | 3000      | 1.049           | 1.0       | 1.0       | 2         | 2         | 0.3       | 0:13:19  | 0.0  | y          | y      |
| 2083 | Detmold                 | 3000      | 1.054           | 1.0       | 1.0       | 2         | 2         | 0.34      | 0:17:29  | 0.0  | y          | y      |
| 2084 | Bielefeld               | 3000      | 1.047           | 1.0       | 1.0       | 2         | 2         | 0.29      | 0:10:04  | 0.0  | y          | y      |
| 2085 | Gütersloh               | 3000      | 1.066           | 1.0       | 1.0       | 2         | 2         | 0.29      | 0:09:01  | 0.0  | y          | y      |
| 2086 | Soest                   | 3000      | 1.056           | 1.0       | 1.0       | 2         | 2         | 0.32      | 0:07:58  | 0.0  | y          | y      |
| 2087 | Dortmund                | 3000      | 1.069           | 1.0       | 1.0       | 2         | 2         | 0.31      | 0:05:50  | 0.0  | y          | y      |
| 2088 | Kassel                  | 3000      | 1.061           | 1.0       | 1.0       | 2         | 2         | 0.33      | 0:05:50  | 0.0  | y          | y      |
| 2089 | Hannover                | 3000      | 1.129           | 1.0       | 1.0       | 2         | 2         | 0.35      | 0:19:40  | 0.0  | y          | y      |
| 2090 | Krefeld                 | 3000      | 1.092           | 1.0       | 1.0       | 2         | 2         | 0.29      | 0:11:42  | 0.0  | y          | y      |
| 2091 | Münster                 | 3000      | 1.067           | 1.0       | 1.0       | 2         | 2         | 0.38      | 1:58:35  | 0.44 | y          | y      |
| 2092 | Paderborn               | 3000      | 1.050           | 1.0       | 1.0       | 2         | 2         | 0.37      | 0:11:54  | 0.0  | y          | y      |
| 2093 | Detmold                 | 3000      | 1.054           | 1.0       | 1.0       | 2         | 2         | 0.42      | 0:13:01  | 0.07 | y          | y      |
| 2094 | Bielefeld               | 3000      | 1.047           | 1.0       | 1.0       | 2         | 2         | 0.35      | *        | *    | *          | *      |
| 2095 | Gütersloh               | 3000      | 1.066           | 1.0       | 1.0       | 2         | 2         | 0.37      | 10:06:48 | 0.0  | y          | y      |
| 2096 | Soest                   | 3000      | 1.056           | 1.0       | 1.0       | 2         | 2         | 0.37      | 0:08:12  | 0.0  | y          | y      |
| 2097 | Dortmund                | 3000      | 1.069           | 1.0       | 1.0       | 2         | 2         | 0.37      | 0:18:48  | 0.0  | y          | y      |
| 2098 | Kassel                  | 3000      | 1.061           | 1.0       | 1.0       | 2         | 2         | 0.37      | 0:43:26  | 0.0  | y          | y      |
| 2099 | Hannover                | 3000      | 1.129           | 1.0       | 1.0       | 2         | 2         | 0.37      | 0:47:52  | 0.0  | y          | y      |
| 2100 | Krefeld                 | 3000      | 1.093           | 1.0       | 1.0       | 2         | 2         | 0.37      | 0:08:22  | 0.0  | y          | y      |
| 2101 | Münster                 | 3000      | 1.067           | 1.0       | 1.0       | 3         | 3         | 0.28      | 0:26:56  | 0.0  | y          | y      |
| 2102 | Paderborn               | 3000      | 1.050           | 1.0       | 1.0       | 3         | 3         | 0.25      | 0:03:07  | 0.0  | y          | y      |
| 2103 | Detmold                 | 3000      | 1.054           | 1.0       | 1.0       | 3         | 3         | 0.34      | 0:22:44  | 0.0  | y          | y      |
| 2104 | Bielefeld               | 3000      | 1.047           | 1.0       | 1.0       | 3         | 3         | 0.27      | 0:08:38  | 0.0  | y          | y      |
| 2105 | Gütersloh               | 3000      | 1.066           | 1.0       | 1.0       | 3         | 3         | 0.3       | 0:15:53  | 0.0  | y          | y      |
| 2106 | Soest                   | 3000      | 1.056           | 1.0       | 1.0       | 3         | 3         | 0.28      | 0:02:37  | 0.0  | y          | y      |
| 2107 | Dortmund                | 3000      | 1.069           | 1.0       | 1.0       | 3         | 3         | 0.4       | 0:03:29  | 0.0  | y          | y      |
| 2108 | Kassel                  | 3000      | 1.061           | 1.0       | 1.0       | 3         | 3         | 0.28      | 0:04:09  | 0.0  | y          | y      |
| 2109 | Hannover                | 3000      | 1.130           | 1.0       | 1.0       | 3         | 3         | 0.34      | 0:26:37  | 0.0  | y          | y      |
| 2110 | Krefeld                 | 3000      | 1.092           | 1.0       | 1.0       | 3         | 3         | 0.31      | 0:30:43  | 0.0  | y          | y      |
| 2111 | Münster                 | 3000      | 1.067           | 1.0       | 1.0       | 3         | 3         | 0.33      | 0:09:41  | 0.19 | y          | y      |
| 2112 | Paderborn               | 3000      | 1.049           | 1.0       | 1.0       | 3         | 3         | 0.32      | 2:47:12  | 0.0  | y          | y      |
| 2113 | Detmold                 | 3000      | 1.054           | 1.0       | 1.0       | 3         | 3         | 0.37      | 0:33:50  | 0.0  | y          | y      |
| 2114 | Bielefeld               | 3000      | 1.047           | 1.0       | 1.0       | 3         | 3         | 0.3       | 1:46:02  | 0.19 | y          | y      |
| 2115 | Gütersloh               | 3000      | 1.066           | 1.0       | 1.0       | 3         | 3         | 0.35      | 11:08:28 | 0.0  | y          | y      |
| 2116 | Soest                   | 3000      | 1.056           | 1.0       | 1.0       | 3         | 3         | 0.33      | 0:10:39  | 0.0  | y          | y      |
| 2117 | Dortmund                | 3000      | 1.069           | 1.0       | 1.0       | 3         | 3         | 0.34      | 0:21:18  | 0.0  | y          | y      |

| #    | Network characteristics |           |                  |           |           |           |           |           | Solution |      | Simulation |        |
|------|-------------------------|-----------|------------------|-----------|-----------|-----------|-----------|-----------|----------|------|------------|--------|
|      | <i>cn</i>               | <i>bu</i> | $\frac{n_l}{bu}$ | <i>lf</i> | <i>tr</i> | <i>lt</i> | <i>tt</i> | <i>as</i> | Time     | Gap  | Volt       | Ampere |
| 2118 | Kassel                  | 3000      | 1.061            | 1.0       | 1.0       | 3         | 3         | 0.35      | 0:07:18  | 0.0  | y          | y      |
| 2119 | Hannover                | 3000      | 1.129            | 1.0       | 1.0       | 3         | 3         | 0.38      | 0:06:36  | 0.0  | y          | y      |
| 2120 | Krefeld                 | 3000      | 1.092            | 1.0       | 1.0       | 3         | 3         | 0.31      | 1:27:00  | 0.0  | y          | y      |
| 2121 | Münster                 | 3000      | 1.067            | 1.0       | 1.0       | 3         | 3         | 0.4       | 0:16:46  | 0.0  | y          | y      |
| 2122 | Paderborn               | 3000      | 1.049            | 1.0       | 1.0       | 3         | 3         | 0.39      | 1:39:32  | 0.0  | n          | y      |
| 2123 | Detmold                 | 3000      | 1.054            | 1.0       | 1.0       | 3         | 3         | 0.44      | 1:15:12  | 0.0  | y          | y      |
| 2124 | Bielefeld               | 3000      | 1.047            | 1.0       | 1.0       | 3         | 3         | 0.36      | *        | *    | *          | *      |
| 2125 | Gütersloh               | 3000      | 1.066            | 1.0       | 1.0       | 3         | 3         | 0.39      | 20:24:28 | 0.0  | y          | y      |
| 2126 | Soest                   | 3000      | 1.056            | 1.0       | 1.0       | 3         | 3         | 0.4       | 2:59:19  | 0.0  | y          | y      |
| 2127 | Dortmund                | 3000      | 1.069            | 1.0       | 1.0       | 3         | 3         | 0.39      | 1:06:51  | 0.0  | y          | y      |
| 2128 | Kassel                  | 3000      | 1.061            | 1.0       | 1.0       | 3         | 3         | 0.39      | 0:13:43  | 0.0  | y          | y      |
| 2129 | Hannover                | 3000      | 1.129            | 1.0       | 1.0       | 3         | 3         | 0.41      | 1:03:54  | 0.22 | y          | y      |
| 2130 | Krefeld                 | 3000      | 1.092            | 1.0       | 1.0       | 3         | 3         | 0.41      | *        | *    | *          | *      |
| 2131 | Münster                 | 3000      | 1.067            | 1.0       | 1.0       | 4         | 4         | 0.37      | 0:05:58  | 0.0  | y          | y      |
| 2132 | Paderborn               | 3000      | 1.049            | 1.0       | 1.0       | 4         | 4         | 0.27      | 0:25:06  | 0.0  | y          | y      |
| 2133 | Detmold                 | 3000      | 1.054            | 1.0       | 1.0       | 4         | 4         | 0.37      | 0:22:30  | 0.0  | y          | y      |
| 2134 | Bielefeld               | 3000      | 1.047            | 1.0       | 1.0       | 4         | 4         | 0.29      | 0:06:06  | 0.0  | y          | y      |
| 2135 | Gütersloh               | 3000      | 1.066            | 1.0       | 1.0       | 4         | 4         | 0.32      | 0:22:02  | 0.0  | y          | y      |
| 2136 | Soest                   | 3000      | 1.056            | 1.0       | 1.0       | 4         | 4         | 0.3       | 0:23:04  | 0.0  | y          | y      |
| 2137 | Dortmund                | 3000      | 1.069            | 1.0       | 1.0       | 4         | 4         | 0.42      | 0:15:38  | 0.0  | y          | y      |
| 2138 | Kassel                  | 3000      | 1.061            | 1.0       | 1.0       | 4         | 4         | 0.31      | 0:06:44  | 0.0  | y          | y      |
| 2139 | Hannover                | 3000      | 1.129            | 1.0       | 1.0       | 4         | 4         | 0.35      | 0:24:54  | 0.0  | y          | y      |
| 2140 | Krefeld                 | 3000      | 1.092            | 1.0       | 1.0       | 4         | 4         | 0.32      | *        | *    | *          | *      |
| 2141 | Münster                 | 3000      | 1.067            | 1.0       | 1.0       | 4         | 4         | 0.38      | 0:12:05  | 0.0  | y          | y      |
| 2142 | Paderborn               | 3000      | 1.049            | 1.0       | 1.0       | 4         | 4         | 0.34      | 1:43:38  | 0.0  | y          | y      |
| 2143 | Detmold                 | 3000      | 1.054            | 1.0       | 1.0       | 4         | 4         | 0.39      | 1:26:17  | 0.33 | y          | y      |
| 2144 | Bielefeld               | 3000      | 1.047            | 1.0       | 1.0       | 4         | 4         | 0.32      | 0:45:39  | 0.0  | y          | y      |
| 2145 | Gütersloh               | 3000      | 1.066            | 1.0       | 1.0       | 4         | 4         | 0.33      | 1:24:23  | 0.32 | y          | y      |
| 2146 | Soest                   | 3000      | 1.056            | 1.0       | 1.0       | 4         | 4         | 0.34      | 0:12:25  | 0.0  | y          | y      |
| 2147 | Dortmund                | 3000      | 1.069            | 1.0       | 1.0       | 4         | 4         | 0.36      | 0:08:42  | 0.0  | y          | y      |
| 2148 | Kassel                  | 3000      | 1.061            | 1.0       | 1.0       | 4         | 4         | 0.38      | 0:09:01  | 0.0  | y          | y      |
| 2149 | Hannover                | 3000      | 1.129            | 1.0       | 1.0       | 4         | 4         | 0.4       | 0:26:09  | 0.0  | y          | y      |
| 2150 | Krefeld                 | 3000      | 1.092            | 1.0       | 1.0       | 4         | 4         | 0.38      | 0:47:16  | 0.0  | y          | y      |
| 2151 | Münster                 | 3000      | 1.067            | 1.0       | 1.0       | 4         | 4         | 0.42      | 0:08:24  | 0.0  | y          | y      |
| 2152 | Paderborn               | 3000      | 1.049            | 1.0       | 1.0       | 4         | 4         | 0.4       | *        | *    | *          | *      |
| 2153 | Detmold                 | 3000      | 1.054            | 1.0       | 1.0       | 4         | 4         | 0.46      | 4:00:14  | 0.31 | y          | y      |
| 2154 | Bielefeld               | 3000      | 1.048            | 1.0       | 1.0       | 4         | 4         | 0.41      | 1:00:51  | 0.0  | y          | y      |
| 2155 | Gütersloh               | 3000      | 1.066            | 1.0       | 1.0       | 4         | 4         | 0.4       | *        | *    | *          | *      |
| 2156 | Soest                   | 3000      | 1.056            | 1.0       | 1.0       | 4         | 4         | 0.42      | 2:18:06  | 0.0  | y          | y      |
| 2157 | Dortmund                | 3000      | 1.069            | 1.0       | 1.0       | 4         | 4         | 0.41      | 0:30:23  | 0.0  | y          | y      |
| 2158 | Kassel                  | 3000      | 1.061            | 1.0       | 1.0       | 4         | 4         | 0.41      | 2:54:52  | 0.11 | y          | y      |
| 2159 | Hannover                | 3000      | 1.129            | 1.0       | 1.0       | 4         | 4         | 0.43      | 1:19:28  | 0.39 | y          | y      |
| 2160 | Krefeld                 | 3000      | 1.092            | 1.0       | 1.0       | 4         | 4         | 0.4       | *        | *    | *          | *      |
| 2161 | Münster                 | 3000      | 1.068            | 0.83      | 1.27      | 2         | 2         | 0.27      | 0:06:22  | 0.0  | y          | y      |
| 2162 | Paderborn               | 3000      | 1.050            | 0.83      | 1.27      | 2         | 2         | 0.25      | 0:03:46  | 0.0  | y          | y      |
| 2163 | Detmold                 | 3000      | 1.055            | 0.83      | 1.27      | 2         | 2         | 0.25      | 0:04:45  | 0.0  | y          | y      |
| 2164 | Bielefeld               | 3000      | 1.049            | 0.83      | 1.27      | 2         | 2         | 0.23      | 0:03:23  | 0.0  | y          | y      |
| 2165 | Gütersloh               | 3000      | 1.068            | 0.83      | 1.27      | 2         | 2         | 0.27      | 0:15:42  | 0.0  | y          | y      |
| 2166 | Soest                   | 3000      | 1.058            | 0.83      | 1.27      | 2         | 2         | 0.27      | 0:04:17  | 0.0  | y          | y      |
| 2167 | Dortmund                | 3000      | 1.071            | 0.83      | 1.27      | 2         | 2         | 0.34      | 0:05:11  | 0.0  | y          | y      |
| 2168 | Kassel                  | 3000      | 1.062            | 0.83      | 1.27      | 2         | 2         | 0.27      | 0:09:31  | 0.0  | y          | y      |
| 2169 | Hannover                | 3000      | 1.131            | 0.83      | 1.27      | 2         | 2         | 0.3       | 0:38:26  | 0.0  | y          | y      |







| #    | Network characteristics |           |                  |           |           |           |           |           | Solution |      | Simulation |        |
|------|-------------------------|-----------|------------------|-----------|-----------|-----------|-----------|-----------|----------|------|------------|--------|
|      | <i>cn</i>               | <i>bu</i> | $\frac{n_l}{bu}$ | <i>lf</i> | <i>tr</i> | <i>lt</i> | <i>tt</i> | <i>as</i> | Time     | Gap  | Volt       | Ampere |
| 2326 | Soest                   | 3000      | 1.057            | 1.34      | 1.27      | 4         | 4         | 0.33      | 0:19:59  | 0.0  | y          | y      |
| 2327 | Dortmund                | 3000      | 1.071            | 1.34      | 1.27      | 4         | 4         | 0.38      | 0:31:23  | 0.0  | y          | y      |
| 2328 | Kassel                  | 3000      | 1.062            | 1.34      | 1.27      | 4         | 4         | 0.32      | 0:11:12  | 0.0  | y          | y      |
| 2329 | Hannover                | 3000      | 1.131            | 1.34      | 1.27      | 4         | 4         | 0.36      | 3:32:15  | 0.0  | y          | y      |
| 2330 | Krefeld                 | 3000      | 1.094            | 1.34      | 1.27      | 4         | 4         | 0.35      | 0:48:46  | 0.0  | y          | y      |
| 2331 | Münster                 | 3000      | 1.068            | 1.34      | 1.27      | 4         | 4         | 0.39      | *        | *    | *          | *      |
| 2332 | Paderborn               | 3000      | 1.051            | 1.34      | 1.27      | 4         | 4         | 0.39      | 0:18:01  | 0.0  | y          | y      |
| 2333 | Detmold                 | 3000      | 1.055            | 1.34      | 1.27      | 4         | 4         | 0.41      | 12:28:13 | 0.15 | y          | y      |
| 2334 | Bielefeld               | 3000      | 1.049            | 1.34      | 1.27      | 4         | 4         | 0.41      | 7:05:20  | 0.0  | y          | y      |
| 2335 | Gütersloh               | 3000      | 1.068            | 1.34      | 1.27      | 4         | 4         | 0.39      | 0:11:02  | 0.0  | y          | y      |
| 2336 | Soest                   | 3000      | 1.057            | 1.34      | 1.27      | 4         | 4         | 0.39      | 0:19:24  | 0.0  | y          | y      |
| 2337 | Dortmund                | 3000      | 1.071            | 1.34      | 1.27      | 4         | 4         | 0.4       | *        | *    | *          | *      |
| 2338 | Kassel                  | 3000      | 1.062            | 1.34      | 1.27      | 4         | 4         | 0.4       | 2:09:02  | 0.0  | y          | y      |
| 2339 | Hannover                | 3000      | 1.131            | 1.34      | 1.27      | 4         | 4         | 0.39      | 2:50:09  | 0.0  | y          | y      |
| 2340 | Krefeld                 | 3000      | 1.094            | 1.34      | 1.27      | 4         | 4         | 0.41      | *        | *    | *          | *      |
| 2341 | Münster                 | 3000      | 1.068            | 1.0       | 1.27      | 2         | 2         | 0.27      | 0:06:05  | 0.0  | y          | y      |
| 2342 | Paderborn               | 3000      | 1.051            | 1.0       | 1.27      | 2         | 2         | 0.21      | 0:04:38  | 0.0  | y          | y      |
| 2343 | Detmold                 | 3000      | 1.055            | 1.0       | 1.27      | 2         | 2         | 0.25      | 0:13:36  | 0.0  | y          | y      |
| 2344 | Bielefeld               | 3000      | 1.049            | 1.0       | 1.27      | 2         | 2         | 0.29      | 0:04:39  | 0.0  | y          | y      |
| 2345 | Gütersloh               | 3000      | 1.068            | 1.0       | 1.27      | 2         | 2         | 0.27      | 0:17:41  | 0.0  | y          | y      |
| 2346 | Soest                   | 3000      | 1.057            | 1.0       | 1.27      | 2         | 2         | 0.25      | 0:04:25  | 0.0  | y          | y      |
| 2347 | Dortmund                | 3000      | 1.071            | 1.0       | 1.27      | 2         | 2         | 0.34      | 0:03:41  | 0.0  | y          | y      |
| 2348 | Kassel                  | 3000      | 1.062            | 1.0       | 1.27      | 2         | 2         | 0.27      | 0:08:34  | 0.0  | y          | y      |
| 2349 | Hannover                | 3000      | 1.131            | 1.0       | 1.27      | 2         | 2         | 0.23      | 0:22:22  | 0.0  | y          | y      |
| 2350 | Krefeld                 | 3000      | 1.094            | 1.0       | 1.27      | 2         | 2         | 0.25      | 0:23:59  | 0.0  | y          | y      |
| 2351 | Münster                 | 3000      | 1.068            | 1.0       | 1.27      | 2         | 2         | 0.31      | 0:06:42  | 0.0  | y          | y      |
| 2352 | Paderborn               | 3000      | 1.051            | 1.0       | 1.27      | 2         | 2         | 0.29      | 0:15:03  | 0.0  | y          | y      |
| 2353 | Detmold                 | 3000      | 1.055            | 1.0       | 1.27      | 2         | 2         | 0.34      | 0:18:27  | 0.0  | y          | y      |
| 2354 | Bielefeld               | 3000      | 1.049            | 1.0       | 1.27      | 2         | 2         | 0.32      | 0:05:03  | 0.0  | y          | y      |
| 2355 | Gütersloh               | 3000      | 1.068            | 1.0       | 1.27      | 2         | 2         | 0.32      | 0:32:57  | 0.0  | y          | y      |
| 2356 | Soest                   | 3000      | 1.057            | 1.0       | 1.27      | 2         | 2         | 0.29      | 0:15:18  | 0.0  | y          | y      |
| 2357 | Dortmund                | 3000      | 1.071            | 1.0       | 1.27      | 2         | 2         | 0.29      | 0:12:47  | 0.18 | y          | y      |
| 2358 | Kassel                  | 3000      | 1.062            | 1.0       | 1.27      | 2         | 2         | 0.28      | 0:11:44  | 0.0  | y          | y      |
| 2359 | Hannover                | 3000      | 1.131            | 1.0       | 1.27      | 2         | 2         | 0.32      | 1:10:48  | 0.0  | y          | y      |
| 2360 | Krefeld                 | 3000      | 1.094            | 1.0       | 1.27      | 2         | 2         | 0.31      | 1:18:26  | 0.0  | y          | y      |
| 2361 | Münster                 | 3000      | 1.068            | 1.0       | 1.27      | 2         | 2         | 0.36      | 2:43:08  | 0.0  | y          | y      |
| 2362 | Paderborn               | 3000      | 1.051            | 1.0       | 1.27      | 2         | 2         | 0.37      | 0:12:10  | 0.0  | y          | y      |
| 2363 | Detmold                 | 3000      | 1.055            | 1.0       | 1.27      | 2         | 2         | 0.41      | 0:19:12  | 0.0  | y          | y      |
| 2364 | Bielefeld               | 3000      | 1.049            | 1.0       | 1.27      | 2         | 2         | 0.37      | 0:17:08  | 0.0  | y          | y      |
| 2365 | Gütersloh               | 3000      | 1.069            | 1.0       | 1.27      | 2         | 2         | 0.37      | 2:59:53  | 0.0  | y          | y      |
| 2366 | Soest                   | 3000      | 1.057            | 1.0       | 1.27      | 2         | 2         | 0.36      | 0:15:36  | 0.0  | y          | y      |
| 2367 | Dortmund                | 3000      | 1.071            | 1.0       | 1.27      | 2         | 2         | 0.37      | 1:01:10  | 0.0  | y          | y      |
| 2368 | Kassel                  | 3000      | 1.062            | 1.0       | 1.27      | 2         | 2         | 0.38      | 0:10:56  | 0.0  | y          | y      |
| 2369 | Hannover                | 3000      | 1.131            | 1.0       | 1.27      | 2         | 2         | 0.36      | 2:40:06  | 0.0  | y          | y      |
| 2370 | Krefeld                 | 3000      | 1.094            | 1.0       | 1.27      | 2         | 2         | 0.38      | 1:05:33  | 0.0  | y          | y      |
| 2371 | Münster                 | 3000      | 1.068            | 1.0       | 1.27      | 3         | 3         | 0.29      | 0:05:58  | 0.0  | y          | y      |
| 2372 | Paderborn               | 3000      | 1.051            | 1.0       | 1.27      | 3         | 3         | 0.24      | 0:15:42  | 0.0  | y          | y      |
| 2373 | Detmold                 | 3000      | 1.055            | 1.0       | 1.27      | 3         | 3         | 0.28      | 0:21:19  | 0.0  | y          | y      |
| 2374 | Bielefeld               | 3000      | 1.049            | 1.0       | 1.27      | 3         | 3         | 0.32      | 0:09:21  | 0.0  | y          | y      |
| 2375 | Gütersloh               | 3000      | 1.068            | 1.0       | 1.27      | 3         | 3         | 0.3       | 10:02:41 | 0.0  | y          | y      |
| 2376 | Soest                   | 3000      | 1.057            | 1.0       | 1.27      | 3         | 3         | 0.28      | 0:05:06  | 0.0  | y          | y      |
| 2377 | Dortmund                | 3000      | 1.070            | 1.0       | 1.27      | 3         | 3         | 0.36      | 0:05:38  | 0.0  | y          | y      |

| #    | Network characteristics |           |                  |           |           |           |           |           | Solution |      | Simulation |        |
|------|-------------------------|-----------|------------------|-----------|-----------|-----------|-----------|-----------|----------|------|------------|--------|
|      | <i>cn</i>               | <i>bu</i> | $\frac{n_l}{bu}$ | <i>lf</i> | <i>tr</i> | <i>lt</i> | <i>tt</i> | <i>as</i> | Time     | Gap  | Volt       | Ampere |
| 2378 | Kassel                  | 3000      | 1.062            | 1.0       | 1.27      | 3         | 3         | 0.3       | 0:39:35  | 0.0  | y          | y      |
| 2379 | Hannover                | 3000      | 1.131            | 1.0       | 1.27      | 3         | 3         | 0.26      | 0:24:16  | 0.0  | y          | y      |
| 2380 | Krefeld                 | 3000      | 1.094            | 1.0       | 1.27      | 3         | 3         | 0.28      | 0:29:07  | 0.0  | y          | y      |
| 2381 | Münster                 | 3000      | 1.068            | 1.0       | 1.27      | 3         | 3         | 0.33      | 0:11:10  | 0.0  | y          | y      |
| 2382 | Paderborn               | 3000      | 1.051            | 1.0       | 1.27      | 3         | 3         | 0.31      | 0:13:27  | 0.0  | y          | y      |
| 2383 | Detmold                 | 3000      | 1.055            | 1.0       | 1.27      | 3         | 3         | 0.32      | 1:55:43  | 0.32 | y          | y      |
| 2384 | Bielefeld               | 3000      | 1.049            | 1.0       | 1.27      | 3         | 3         | 0.34      | 0:07:35  | 0.0  | y          | y      |
| 2385 | Gütersloh               | 3000      | 1.068            | 1.0       | 1.27      | 3         | 3         | 0.34      | 0:49:03  | 0.0  | y          | y      |
| 2386 | Soest                   | 3000      | 1.057            | 1.0       | 1.27      | 3         | 3         | 0.31      | 0:17:39  | 0.42 | y          | y      |
| 2387 | Dortmund                | 3000      | 1.070            | 1.0       | 1.27      | 3         | 3         | 0.32      | 0:12:02  | 0.0  | y          | y      |
| 2388 | Kassel                  | 3000      | 1.062            | 1.0       | 1.27      | 3         | 3         | 0.3       | 2:41:38  | 0.0  | y          | y      |
| 2389 | Hannover                | 3000      | 1.131            | 1.0       | 1.27      | 3         | 3         | 0.33      | 1:26:19  | 0.0  | y          | y      |
| 2390 | Krefeld                 | 3000      | 1.094            | 1.0       | 1.27      | 3         | 3         | 0.33      | 0:43:27  | 0.0  | y          | y      |
| 2391 | Münster                 | 3000      | 1.068            | 1.0       | 1.27      | 3         | 3         | 0.38      | 23:53:33 | 0.35 | y          | y      |
| 2392 | Paderborn               | 3000      | 1.051            | 1.0       | 1.27      | 3         | 3         | 0.38      | 1:45:21  | 0.0  | y          | y      |
| 2393 | Detmold                 | 3000      | 1.055            | 1.0       | 1.27      | 3         | 3         | 0.43      | 0:58:33  | 0.0  | y          | y      |
| 2394 | Bielefeld               | 3000      | 1.049            | 1.0       | 1.27      | 3         | 3         | 0.39      | 0:59:43  | 0.0  | y          | y      |
| 2395 | Gütersloh               | 3000      | 1.068            | 1.0       | 1.27      | 3         | 3         | 0.38      | 0:27:38  | 0.0  | y          | y      |
| 2396 | Soest                   | 3000      | 1.057            | 1.0       | 1.27      | 3         | 3         | 0.38      | 0:08:54  | 0.0  | y          | y      |
| 2397 | Dortmund                | 3000      | 1.071            | 1.0       | 1.27      | 3         | 3         | 0.39      | 5:18:01  | 0.0  | y          | y      |
| 2398 | Kassel                  | 3000      | 1.062            | 1.0       | 1.27      | 3         | 3         | 0.39      | 0:34:12  | 0.0  | y          | y      |
| 2399 | Hannover                | 3000      | 1.131            | 1.0       | 1.27      | 3         | 3         | 0.38      | 1:10:05  | 0.2  | y          | y      |
| 2400 | Krefeld                 | 3000      | 1.094            | 1.0       | 1.27      | 3         | 3         | 0.39      | *        | *    | y          | *      |
| 2401 | Münster                 | 3000      | 1.068            | 1.0       | 1.27      | 4         | 4         | 0.31      | 0:06:54  | 0.0  | y          | y      |
| 2402 | Paderborn               | 3000      | 1.051            | 1.0       | 1.27      | 4         | 4         | 0.26      | 0:26:31  | 0.0  | y          | y      |
| 2403 | Detmold                 | 3000      | 1.055            | 1.0       | 1.27      | 4         | 4         | 0.3       | 0:12:44  | 0.0  | y          | y      |
| 2404 | Bielefeld               | 3000      | 1.049            | 1.0       | 1.27      | 4         | 4         | 0.28      | 0:05:40  | 0.0  | y          | y      |
| 2405 | Gütersloh               | 3000      | 1.068            | 1.0       | 1.27      | 4         | 4         | 0.32      | 1:24:38  | 0.0  | y          | y      |
| 2406 | Soest                   | 3000      | 1.058            | 1.0       | 1.27      | 4         | 4         | 0.3       | 0:10:40  | 0.0  | y          | y      |
| 2407 | Dortmund                | 3000      | 1.071            | 1.0       | 1.27      | 4         | 4         | 0.32      | 0:07:50  | 0.0  | y          | y      |
| 2408 | Kassel                  | 3000      | 1.062            | 1.0       | 1.27      | 4         | 4         | 0.32      | 0:17:45  | 0.0  | y          | y      |
| 2409 | Hannover                | 3000      | 1.131            | 1.0       | 1.27      | 4         | 4         | 0.36      | 0:31:55  | 0.0  | y          | y      |
| 2410 | Krefeld                 | 3000      | 1.094            | 1.0       | 1.27      | 4         | 4         | 0.31      | 0:30:39  | 0.0  | y          | y      |
| 2411 | Münster                 | 3000      | 1.068            | 1.0       | 1.27      | 4         | 4         | 0.34      | 0:17:24  | 0.0  | y          | y      |
| 2412 | Paderborn               | 3000      | 1.051            | 1.0       | 1.27      | 4         | 4         | 0.32      | 0:13:02  | 0.0  | y          | y      |
| 2413 | Detmold                 | 3000      | 1.055            | 1.0       | 1.27      | 4         | 4         | 0.38      | 0:47:59  | 0.0  | y          | y      |
| 2414 | Bielefeld               | 3000      | 1.049            | 1.0       | 1.27      | 4         | 4         | 0.36      | 0:08:21  | 0.0  | y          | y      |
| 2415 | Gütersloh               | 3000      | 1.068            | 1.0       | 1.27      | 4         | 4         | 0.36      | 0:15:28  | 0.0  | y          | y      |
| 2416 | Soest                   | 3000      | 1.058            | 1.0       | 1.27      | 4         | 4         | 0.35      | 0:14:24  | 0.0  | y          | y      |
| 2417 | Dortmund                | 3000      | 1.071            | 1.0       | 1.27      | 4         | 4         | 0.38      | 2:43:24  | 0.0  | y          | y      |
| 2418 | Kassel                  | 3000      | 1.062            | 1.0       | 1.27      | 4         | 4         | 0.32      | 0:34:20  | 0.0  | y          | y      |
| 2419 | Hannover                | 3000      | 1.131            | 1.0       | 1.27      | 4         | 4         | 0.36      | 0:47:49  | 0.0  | y          | y      |
| 2420 | Krefeld                 | 3000      | 1.094            | 1.0       | 1.27      | 4         | 4         | 0.35      | 1:05:13  | 0.0  | y          | y      |
| 2421 | Münster                 | 3000      | 1.068            | 1.0       | 1.27      | 4         | 4         | 0.39      | *        | *    | y          | *      |
| 2422 | Paderborn               | 3000      | 1.051            | 1.0       | 1.27      | 4         | 4         | 0.4       | 0:34:59  | 0.0  | y          | y      |
| 2423 | Detmold                 | 3000      | 1.055            | 1.0       | 1.27      | 4         | 4         | 0.45      | 1:36:52  | 0.0  | y          | y      |
| 2424 | Bielefeld               | 3000      | 1.049            | 1.0       | 1.27      | 4         | 4         | 0.41      | 1:00:56  | 0.0  | y          | y      |
| 2425 | Gütersloh               | 3000      | 1.068            | 1.0       | 1.27      | 4         | 4         | 0.39      | 2:35:21  | 0.0  | y          | y      |
| 2426 | Soest                   | 3000      | 1.057            | 1.0       | 1.27      | 4         | 4         | 0.42      | 12:32:58 | 0.14 | y          | y      |
| 2427 | Dortmund                | 3000      | 1.071            | 1.0       | 1.27      | 4         | 4         | 0.4       | 0:37:54  | 0.0  | y          | y      |
| 2428 | Kassel                  | 3000      | 1.062            | 1.0       | 1.27      | 4         | 4         | 0.4       | 0:23:44  | 0.0  | y          | y      |
| 2429 | Hannover                | 3000      | 1.131            | 1.0       | 1.27      | 4         | 4         | 0.41      | 3:36:38  | 0.42 | y          | y      |

| #    | Network characteristics |           |                  |           |           |           |           |           | Solution |      | Simulation |        |
|------|-------------------------|-----------|------------------|-----------|-----------|-----------|-----------|-----------|----------|------|------------|--------|
|      | <i>cn</i>               | <i>bu</i> | $\frac{n_l}{bu}$ | <i>lf</i> | <i>tr</i> | <i>lt</i> | <i>tt</i> | <i>as</i> | Time     | Gap  | Volt       | Ampere |
| 2430 | Krefeld                 | 3000      | 1.094            | 1.0       | 1.27      | 4         | 4         | 0.41      | *        | *    | *          | *      |
| 2431 | Münster                 | 4000      | 1.063            | 0.83      | 0.75      | 2         | 2         | 0.39      | 0:27:55  | 0.0  | y          | y      |
| 2432 | Paderborn               | 4000      | 1.046            | 0.83      | 0.75      | 2         | 2         | 0.28      | 0:04:42  | 0.0  | y          | y      |
| 2433 | Detmold                 | 4000      | 1.050            | 0.83      | 0.75      | 2         | 2         | 0.25      | 0:21:14  | 0.0  | y          | y      |
| 2434 | Bielefeld               | 4000      | 1.048            | 0.83      | 0.75      | 2         | 2         | 0.22      | 0:20:43  | 0.0  | y          | y      |
| 2435 | Gütersloh               | 4000      | 1.062            | 0.83      | 0.75      | 2         | 2         | 0.33      | 0:25:33  | 0.0  | y          | y      |
| 2436 | Soest                   | 4000      | 1.056            | 0.83      | 0.75      | 2         | 2         | 0.26      | 0:10:12  | 0.0  | y          | y      |
| 2437 | Dortmund                | 4000      | 1.069            | 0.83      | 0.75      | 2         | 2         | 0.27      | 0:31:22  | 0.0  | y          | y      |
| 2438 | Kassel                  | 4000      | 1.070            | 0.83      | 0.75      | 2         | 2         | 0.26      | 0:11:58  | 0.0  | y          | y      |
| 2439 | Hannover                | 4000      | 1.146            | 0.83      | 0.75      | 2         | 2         | 0.3       | 2:36:11  | 0.0  | y          | y      |
| 2440 | Krefeld                 | 4000      | 1.099            | 0.83      | 0.75      | 2         | 2         | 0.27      | 0:46:25  | 0.0  | y          | y      |
| 2441 | Münster                 | 4000      | 1.063            | 0.83      | 0.75      | 2         | 2         | 0.32      | 1:38:59  | 0.0  | y          | y      |
| 2442 | Paderborn               | 4000      | 1.046            | 0.83      | 0.75      | 2         | 2         | 0.36      | 0:17:32  | 0.0  | y          | y      |
| 2443 | Detmold                 | 4000      | 1.050            | 0.83      | 0.75      | 2         | 2         | 0.3       | 9:27:00  | 0.33 | y          | y      |
| 2444 | Bielefeld               | 4000      | 1.048            | 0.83      | 0.75      | 2         | 2         | 0.33      | 0:38:32  | 0.0  | y          | y      |
| 2445 | Gütersloh               | 4000      | 1.062            | 0.83      | 0.75      | 2         | 2         | 0.31      | 0:35:30  | 0.0  | y          | y      |
| 2446 | Soest                   | 4000      | 1.056            | 0.83      | 0.75      | 2         | 2         | 0.3       | 1:40:56  | 0.0  | y          | y      |
| 2447 | Dortmund                | 4000      | 1.069            | 0.83      | 0.75      | 2         | 2         | 0.34      | 0:25:39  | 0.0  | y          | y      |
| 2448 | Kassel                  | 4000      | 1.070            | 0.83      | 0.75      | 2         | 2         | 0.31      | 0:41:54  | 0.0  | y          | y      |
| 2449 | Hannover                | 4000      | 1.146            | 0.83      | 0.75      | 2         | 2         | 0.32      | 0:34:21  | 0.0  | y          | y      |
| 2450 | Krefeld                 | 4000      | 1.099            | 0.83      | 0.75      | 2         | 2         | 0.34      | *        | *    | *          | *      |
| 2451 | Münster                 | 4000      | 1.063            | 0.83      | 0.75      | 2         | 2         | 0.4       | 0:52:14  | 0.0  | y          | y      |
| 2452 | Paderborn               | 4000      | 1.046            | 0.83      | 0.75      | 2         | 2         | 0.39      | *        | *    | *          | *      |
| 2453 | Detmold                 | 4000      | 1.050            | 0.83      | 0.75      | 2         | 2         | 0.38      | *        | *    | *          | *      |
| 2454 | Bielefeld               | 4000      | 1.048            | 0.83      | 0.75      | 2         | 2         | 0.38      | 0:35:11  | 0.0  | y          | y      |
| 2455 | Gütersloh               | 4000      | 1.062            | 0.83      | 0.75      | 2         | 2         | 0.4       | 0:40:27  | 0.16 | y          | y      |
| 2456 | Soest                   | 4000      | 1.056            | 0.83      | 0.75      | 2         | 2         | 0.37      | 0:40:24  | 0.0  | y          | y      |
| 2457 | Dortmund                | 4000      | 1.069            | 0.83      | 0.75      | 2         | 2         | 0.38      | 1:13:29  | 0.0  | y          | y      |
| 2458 | Kassel                  | 4000      | 1.070            | 0.83      | 0.75      | 2         | 2         | 0.37      | *        | *    | *          | *      |
| 2459 | Hannover                | 4000      | 1.146            | 0.83      | 0.75      | 2         | 2         | 0.39      | 1:01:02  | 0.0  | y          | y      |
| 2460 | Krefeld                 | 4000      | 1.099            | 0.83      | 0.75      | 2         | 2         | 0.39      | 1:14:45  | 0.15 | y          | y      |
| 2461 | Münster                 | 4000      | 1.063            | 0.83      | 0.75      | 3         | 3         | 0.31      | 0:31:28  | 0.0  | y          | y      |
| 2462 | Paderborn               | 4000      | 1.046            | 0.83      | 0.75      | 3         | 3         | 0.31      | 0:06:02  | 0.0  | y          | y      |
| 2463 | Detmold                 | 4000      | 1.050            | 0.83      | 0.75      | 3         | 3         | 0.28      | 0:22:51  | 0.0  | y          | y      |
| 2464 | Bielefeld               | 4000      | 1.048            | 0.83      | 0.75      | 3         | 3         | 0.25      | 1:39:40  | 0.0  | y          | y      |
| 2465 | Gütersloh               | 4000      | 1.062            | 0.83      | 0.75      | 3         | 3         | 0.29      | 0:23:35  | 0.0  | y          | y      |
| 2466 | Soest                   | 4000      | 1.056            | 0.83      | 0.75      | 3         | 3         | 0.29      | 0:34:07  | 0.0  | y          | y      |
| 2467 | Dortmund                | 4000      | 1.069            | 0.83      | 0.75      | 3         | 3         | 0.37      | 0:40:44  | 0.0  | y          | y      |
| 2468 | Kassel                  | 4000      | 1.070            | 0.83      | 0.75      | 3         | 3         | 0.27      | 0:33:59  | 0.0  | y          | y      |
| 2469 | Hannover                | 4000      | 1.146            | 0.83      | 0.75      | 3         | 3         | 0.28      | 1:48:43  | 0.0  | y          | y      |
| 2470 | Krefeld                 | 4000      | 1.099            | 0.83      | 0.75      | 3         | 3         | 0.34      | 11:02:43 | 0.0  | y          | y      |
| 2471 | Münster                 | 4000      | 1.063            | 0.83      | 0.75      | 3         | 3         | 0.33      | 7:46:10  | 0.15 | y          | y      |
| 2472 | Paderborn               | 4000      | 1.046            | 0.83      | 0.75      | 3         | 3         | 0.38      | 0:12:04  | 0.0  | y          | y      |
| 2473 | Detmold                 | 4000      | 1.050            | 0.83      | 0.75      | 3         | 3         | 0.36      | *        | *    | *          | *      |
| 2474 | Bielefeld               | 4000      | 1.048            | 0.83      | 0.75      | 3         | 3         | 0.35      | 23:35:25 | 0.0  | y          | y      |
| 2475 | Gütersloh               | 4000      | 1.062            | 0.83      | 0.75      | 3         | 3         | 0.32      | 8:23:51  | 0.2  | y          | y      |
| 2476 | Soest                   | 4000      | 1.056            | 0.83      | 0.75      | 3         | 3         | 0.32      | 1:37:02  | 0.0  | y          | y      |
| 2477 | Dortmund                | 4000      | 1.069            | 0.83      | 0.75      | 3         | 3         | 0.36      | 0:50:21  | 0.0  | y          | y      |
| 2478 | Kassel                  | 4000      | 1.070            | 0.83      | 0.75      | 3         | 3         | 0.33      | 1:08:23  | 0.0  | y          | y      |
| 2479 | Hannover                | 4000      | 1.146            | 0.83      | 0.75      | 3         | 3         | 0.34      | 1:47:55  | 0.0  | y          | y      |
| 2480 | Krefeld                 | 4000      | 1.099            | 0.83      | 0.75      | 3         | 3         | 0.37      | *        | *    | *          | *      |
| 2481 | Münster                 | 4000      | 1.063            | 0.83      | 0.75      | 3         | 3         | 0.42      | 2:59:57  | 0.0  | y          | y      |

| #    | Network characteristics |           |                  |           |           |           |           | Solution  |          | Simulation |      |        |
|------|-------------------------|-----------|------------------|-----------|-----------|-----------|-----------|-----------|----------|------------|------|--------|
|      | <i>cn</i>               | <i>bu</i> | $\frac{n_l}{bu}$ | <i>lf</i> | <i>tr</i> | <i>lt</i> | <i>tt</i> | <i>as</i> | Time     | Gap        | Volt | Ampere |
| 2482 | Paderborn               | 4000      | 1.046            | 0.83      | 0.75      | 3         | 3         | 0.39      | 3:40:00  | 0.09       | y    | y      |
| 2483 | Detmold                 | 4000      | 1.050            | 0.83      | 0.75      | 3         | 3         | 0.4       | *        | *          | *    | *      |
| 2484 | Bielefeld               | 4000      | 1.048            | 0.83      | 0.75      | 3         | 3         | 0.4       | *        | *          | *    | *      |
| 2485 | Gütersloh               | 4000      | 1.062            | 0.83      | 0.75      | 3         | 3         | 0.42      | *        | *          | *    | *      |
| 2486 | Soest                   | 4000      | 1.056            | 0.83      | 0.75      | 3         | 3         | 0.4       | 9:49:54  | 0.0        | y    | y      |
| 2487 | Dortmund                | 4000      | 1.069            | 0.83      | 0.75      | 3         | 3         | 0.41      | *        | *          | *    | *      |
| 2488 | Kassel                  | 4000      | 1.071            | 0.83      | 0.75      | 3         | 3         | 0.41      | *        | *          | *    | *      |
| 2489 | Hannover                | 4000      | 1.146            | 0.83      | 0.75      | 3         | 3         | 0.41      | *        | *          | *    | *      |
| 2490 | Krefeld                 | 4000      | 1.099            | 0.83      | 0.75      | 3         | 3         | 0.41      | *        | *          | *    | *      |
| 2491 | Münster                 | 4000      | 1.063            | 0.83      | 0.75      | 4         | 4         | 0.45      | 0:21:59  | 0.0        | y    | y      |
| 2492 | Paderborn               | 4000      | 1.046            | 0.83      | 0.75      | 4         | 4         | 0.36      | 0:21:51  | 0.0        | y    | y      |
| 2493 | Detmold                 | 4000      | 1.050            | 0.83      | 0.75      | 4         | 4         | 0.29      | 0:32:11  | 0.0        | y    | y      |
| 2494 | Bielefeld               | 4000      | 1.048            | 0.83      | 0.75      | 4         | 4         | 0.27      | 1:30:28  | 0.0        | y    | y      |
| 2495 | Gütersloh               | 4000      | 1.062            | 0.83      | 0.75      | 4         | 4         | 0.39      | 3:53:24  | 0.0        | y    | y      |
| 2496 | Soest                   | 4000      | 1.056            | 0.83      | 0.75      | 4         | 4         | 0.31      | 0:22:30  | 0.0        | y    | y      |
| 2497 | Dortmund                | 4000      | 1.069            | 0.83      | 0.75      | 4         | 4         | 0.33      | 2:20:58  | 0.0        | y    | y      |
| 2498 | Kassel                  | 4000      | 1.070            | 0.83      | 0.75      | 4         | 4         | 0.3       | 0:40:57  | 0.0        | y    | y      |
| 2499 | Hannover                | 4000      | 1.146            | 0.83      | 0.75      | 4         | 4         | 0.31      | 1:07:29  | 0.0        | y    | y      |
| 2500 | Krefeld                 | 4000      | 1.099            | 0.83      | 0.75      | 4         | 4         | 0.37      | 14:12:45 | 0.0        | y    | y      |
| 2501 | Münster                 | 4000      | 1.063            | 0.83      | 0.75      | 4         | 4         | 0.35      | *        | *          | *    | *      |
| 2502 | Paderborn               | 4000      | 1.046            | 0.83      | 0.75      | 4         | 4         | 0.35      | 6:45:12  | 0.36       | y    | y      |
| 2503 | Detmold                 | 4000      | 1.050            | 0.83      | 0.75      | 4         | 4         | 0.34      | *        | *          | *    | *      |
| 2504 | Bielefeld               | 4000      | 1.048            | 0.83      | 0.75      | 4         | 4         | 0.37      | 26:30:33 | 0.0        | y    | y      |
| 2505 | Gütersloh               | 4000      | 1.062            | 0.83      | 0.75      | 4         | 4         | 0.34      | 4:44:05  | 0.0        | y    | y      |
| 2506 | Soest                   | 4000      | 1.056            | 0.83      | 0.75      | 4         | 4         | 0.35      | 4:29:45  | 0.0        | y    | y      |
| 2507 | Dortmund                | 4000      | 1.069            | 0.83      | 0.75      | 4         | 4         | 0.39      | 13:48:16 | 0.0        | y    | y      |
| 2508 | Kassel                  | 4000      | 1.070            | 0.83      | 0.75      | 4         | 4         | 0.35      | *        | *          | *    | *      |
| 2509 | Hannover                | 4000      | 1.146            | 0.83      | 0.75      | 4         | 4         | 0.35      | 1:58:07  | 0.44       | y    | y      |
| 2510 | Krefeld                 | 4000      | 1.099            | 0.83      | 0.75      | 4         | 4         | 0.39      | *        | *          | *    | *      |
| 2511 | Münster                 | 4000      | 1.063            | 0.83      | 0.75      | 4         | 4         | 0.42      | *        | *          | *    | *      |
| 2512 | Paderborn               | 4000      | 1.046            | 0.83      | 0.75      | 4         | 4         | 0.43      | *        | *          | *    | *      |
| 2513 | Detmold                 | 4000      | 1.050            | 0.83      | 0.75      | 4         | 4         | 0.41      | *        | *          | *    | *      |
| 2514 | Bielefeld               | 4000      | 1.048            | 0.83      | 0.75      | 4         | 4         | 0.42      | 9:05:30  | 0.0        | y    | y      |
| 2515 | Gütersloh               | 4000      | 1.062            | 0.83      | 0.75      | 4         | 4         | 0.43      | *        | *          | *    | *      |
| 2516 | Soest                   | 4000      | 1.056            | 0.83      | 0.75      | 4         | 4         | 0.41      | *        | *          | *    | *      |
| 2517 | Dortmund                | 4000      | 1.069            | 0.83      | 0.75      | 4         | 4         | 0.42      | *        | *          | *    | *      |
| 2518 | Kassel                  | 4000      | 1.071            | 0.83      | 0.75      | 4         | 4         | 0.4       | *        | *          | *    | *      |
| 2519 | Hannover                | 4000      | 1.146            | 0.83      | 0.75      | 4         | 4         | 0.4       | *        | *          | *    | *      |
| 2520 | Krefeld                 | 4000      | 1.099            | 0.83      | 0.75      | 4         | 4         | 0.4       | *        | *          | *    | *      |
| 2521 | Münster                 | 4000      | 1.063            | 1.34      | 0.75      | 2         | 2         | 0.26      | 0:55:17  | 0.0        | y    | y      |
| 2522 | Paderborn               | 4000      | 1.046            | 1.34      | 0.75      | 2         | 2         | 0.28      | 0:04:33  | 0.0        | y    | y      |
| 2523 | Detmold                 | 4000      | 1.050            | 1.34      | 0.75      | 2         | 2         | 0.25      | 0:25:19  | 0.0        | y    | y      |
| 2524 | Bielefeld               | 4000      | 1.047            | 1.34      | 0.75      | 2         | 2         | 0.27      | 0:09:52  | 0.0        | y    | y      |
| 2525 | Gütersloh               | 4000      | 1.062            | 1.34      | 0.75      | 2         | 2         | 0.26      | 0:33:48  | 0.0        | y    | y      |
| 2526 | Soest                   | 4000      | 1.056            | 1.34      | 0.75      | 2         | 2         | 0.26      | 0:17:43  | 0.0        | y    | y      |
| 2527 | Dortmund                | 4000      | 1.069            | 1.34      | 0.75      | 2         | 2         | 0.33      | 0:32:51  | 0.0        | y    | y      |
| 2528 | Kassel                  | 4000      | 1.070            | 1.34      | 0.75      | 2         | 2         | 0.25      | 0:06:58  | 0.0        | y    | y      |
| 2529 | Hannover                | 4000      | 1.146            | 1.34      | 0.75      | 2         | 2         | 0.25      | 0:42:15  | 0.0        | y    | y      |
| 2530 | Krefeld                 | 4000      | 1.099            | 1.34      | 0.75      | 2         | 2         | 0.31      | 0:43:06  | 0.0        | y    | y      |
| 2531 | Münster                 | 4000      | 1.063            | 1.34      | 0.75      | 2         | 2         | 0.31      | 0:32:15  | 0.0        | y    | y      |
| 2532 | Paderborn               | 4000      | 1.046            | 1.34      | 0.75      | 2         | 2         | 0.31      | 0:12:04  | 0.0        | y    | y      |
| 2533 | Detmold                 | 4000      | 1.050            | 1.34      | 0.75      | 2         | 2         | 0.3       | *        | *          | *    | *      |

| #    | <i>cn</i> | Network characteristics |                 |           |           |           |           |           | Solution |      | Simulation |        |
|------|-----------|-------------------------|-----------------|-----------|-----------|-----------|-----------|-----------|----------|------|------------|--------|
|      |           | <i>bu</i>               | $\frac{nI}{bu}$ | <i>lf</i> | <i>tr</i> | <i>lt</i> | <i>tt</i> | <i>as</i> | Time     | Gap  | Volt       | Ampere |
| 2534 | Bielefeld | 4000                    | 1.048           | 1.34      | 0.75      | 2         | 2         | 0.33      | 1:24:16  | 0.0  | y          | y      |
| 2535 | Gütersloh | 4000                    | 1.062           | 1.34      | 0.75      | 2         | 2         | 0.3       | 3:33:48  | 0.11 | y          | y      |
| 2536 | Soest     | 4000                    | 1.056           | 1.34      | 0.75      | 2         | 2         | 0.3       | *        | *    | *          | *      |
| 2537 | Dortmund  | 4000                    | 1.069           | 1.34      | 0.75      | 2         | 2         | 0.31      | 0:13:30  | 0.0  | y          | y      |
| 2538 | Kassel    | 4000                    | 1.070           | 1.34      | 0.75      | 2         | 2         | 0.31      | 0:14:43  | 0.0  | y          | y      |
| 2539 | Hannover  | 4000                    | 1.146           | 1.34      | 0.75      | 2         | 2         | 0.31      | *        | *    | *          | *      |
| 2540 | Krefeld   | 4000                    | 1.099           | 1.34      | 0.75      | 2         | 2         | 0.34      | *        | *    | *          | *      |
| 2541 | Münster   | 4000                    | 1.063           | 1.34      | 0.75      | 2         | 2         | 0.39      | *        | *    | *          | *      |
| 2542 | Paderborn | 4000                    | 1.046           | 1.34      | 0.75      | 2         | 2         | 0.38      | 16:13:26 | 0.2  | n          | y      |
| 2543 | Detmold   | 4000                    | 1.050           | 1.34      | 0.75      | 2         | 2         | 0.38      | *        | *    | *          | *      |
| 2544 | Bielefeld | 4000                    | 1.048           | 1.34      | 0.75      | 2         | 2         | 0.38      | 2:50:54  | 0.0  | y          | y      |
| 2545 | Gütersloh | 4000                    | 1.062           | 1.34      | 0.75      | 2         | 2         | 0.36      | *        | *    | *          | *      |
| 2546 | Soest     | 4000                    | 1.056           | 1.34      | 0.75      | 2         | 2         | 0.37      | 17:08:27 | 0.04 | y          | y      |
| 2547 | Dortmund  | 4000                    | 1.069           | 1.34      | 0.75      | 2         | 2         | 0.39      | *        | *    | *          | *      |
| 2548 | Kassel    | 4000                    | 1.070           | 1.34      | 0.75      | 2         | 2         | 0.37      | *        | *    | *          | *      |
| 2549 | Hannover  | 4000                    | 1.146           | 1.34      | 0.75      | 2         | 2         | 0.39      | 4:21:48  | 0.0  | y          | y      |
| 2550 | Krefeld   | 4000                    | 1.099           | 1.34      | 0.75      | 2         | 2         | 0.39      | *        | *    | *          | *      |
| 2551 | Münster   | 4000                    | 1.063           | 1.34      | 0.75      | 3         | 3         | 0.31      | 0:40:25  | 0.0  | y          | y      |
| 2552 | Paderborn | 4000                    | 1.046           | 1.34      | 0.75      | 3         | 3         | 0.31      | 0:06:50  | 0.0  | y          | y      |
| 2553 | Detmold   | 4000                    | 1.050           | 1.34      | 0.75      | 3         | 3         | 0.27      | 0:23:24  | 0.0  | y          | y      |
| 2554 | Bielefeld | 4000                    | 1.048           | 1.34      | 0.75      | 3         | 3         | 0.25      | 0:56:36  | 0.0  | y          | y      |
| 2555 | Gütersloh | 4000                    | 1.062           | 1.34      | 0.75      | 3         | 3         | 0.29      | 3:49:53  | 0.0  | y          | y      |
| 2556 | Soest     | 4000                    | 1.056           | 1.34      | 0.75      | 3         | 3         | 0.29      | 0:12:59  | 0.0  | y          | y      |
| 2557 | Dortmund  | 4000                    | 1.069           | 1.34      | 0.75      | 3         | 3         | 0.32      | 6:39:05  | 0.0  | y          | y      |
| 2558 | Kassel    | 4000                    | 1.070           | 1.34      | 0.75      | 3         | 3         | 0.27      | 0:54:52  | 0.0  | y          | y      |
| 2559 | Hannover  | 4000                    | 1.146           | 1.34      | 0.75      | 3         | 3         | 0.28      | 0:38:16  | 0.0  | y          | y      |
| 2560 | Krefeld   | 4000                    | 1.099           | 1.34      | 0.75      | 3         | 3         | 0.33      | 2:41:14  | 0.21 | y          | y      |
| 2561 | Münster   | 4000                    | 1.063           | 1.34      | 0.75      | 3         | 3         | 0.35      | *        | *    | *          | *      |
| 2562 | Paderborn | 4000                    | 1.046           | 1.34      | 0.75      | 3         | 3         | 0.38      | 0:51:17  | 0.0  | y          | y      |
| 2563 | Detmold   | 4000                    | 1.050           | 1.34      | 0.75      | 3         | 3         | 0.32      | *        | *    | *          | *      |
| 2564 | Bielefeld | 4000                    | 1.048           | 1.34      | 0.75      | 3         | 3         | 0.35      | 18:04:36 | 0.14 | y          | y      |
| 2565 | Gütersloh | 4000                    | 1.062           | 1.34      | 0.75      | 3         | 3         | 0.33      | 6:35:30  | 0.2  | y          | y      |
| 2566 | Soest     | 4000                    | 1.056           | 1.34      | 0.75      | 3         | 3         | 0.34      | 1:51:18  | 0.0  | y          | y      |
| 2567 | Dortmund  | 4000                    | 1.069           | 1.34      | 0.75      | 3         | 3         | 0.36      | 1:55:32  | 0.0  | y          | y      |
| 2568 | Kassel    | 4000                    | 1.070           | 1.34      | 0.75      | 3         | 3         | 0.33      | 1:09:50  | 0.0  | y          | y      |
| 2569 | Hannover  | 4000                    | 1.146           | 1.34      | 0.75      | 3         | 3         | 0.33      | 1:59:31  | 0.0  | y          | y      |
| 2570 | Krefeld   | 4000                    | 1.099           | 1.34      | 0.75      | 3         | 3         | 0.31      | *        | *    | *          | *      |
| 2571 | Münster   | 4000                    | 1.063           | 1.34      | 0.75      | 3         | 3         | 0.42      | 1:21:26  | 0.0  | y          | y      |
| 2572 | Paderborn | 4000                    | 1.046           | 1.34      | 0.75      | 3         | 3         | 0.4       | *        | *    | *          | *      |
| 2573 | Detmold   | 4000                    | 1.050           | 1.34      | 0.75      | 3         | 3         | 0.4       | *        | *    | *          | *      |
| 2574 | Bielefeld | 4000                    | 1.048           | 1.34      | 0.75      | 3         | 3         | 0.4       | *        | *    | *          | *      |
| 2575 | Gütersloh | 4000                    | 1.062           | 1.34      | 0.75      | 3         | 3         | 0.38      | *        | *    | *          | *      |
| 2576 | Soest     | 4000                    | 1.056           | 1.34      | 0.75      | 3         | 3         | 0.39      | *        | *    | *          | *      |
| 2577 | Dortmund  | 4000                    | 1.069           | 1.34      | 0.75      | 3         | 3         | 0.4       | *        | *    | *          | *      |
| 2578 | Kassel    | 4000                    | 1.070           | 1.34      | 0.75      | 3         | 3         | 0.39      | *        | *    | *          | *      |
| 2579 | Hannover  | 4000                    | 1.146           | 1.34      | 0.75      | 3         | 3         | 0.41      | *        | *    | *          | *      |
| 2580 | Krefeld   | 4000                    | 1.099           | 1.34      | 0.75      | 3         | 3         | 0.38      | *        | *    | *          | *      |
| 2581 | Münster   | 4000                    | 1.063           | 1.34      | 0.75      | 4         | 4         | 0.31      | 2:23:38  | 0.0  | y          | y      |
| 2582 | Paderborn | 4000                    | 1.046           | 1.34      | 0.75      | 4         | 4         | 0.36      | 0:11:11  | 0.0  | y          | y      |
| 2583 | Detmold   | 4000                    | 1.050           | 1.34      | 0.75      | 4         | 4         | 0.31      | 2:10:23  | 0.0  | y          | y      |
| 2584 | Bielefeld | 4000                    | 1.048           | 1.34      | 0.75      | 4         | 4         | 0.27      | 1:24:34  | 0.0  | y          | y      |
| 2585 | Gütersloh | 4000                    | 1.062           | 1.34      | 0.75      | 4         | 4         | 0.31      | 9:22:54  | 0.0  | y          | y      |

| #    | Network characteristics |           |                  |           |           |           |           | Solution  |          | Simulation |      |        |
|------|-------------------------|-----------|------------------|-----------|-----------|-----------|-----------|-----------|----------|------------|------|--------|
|      | <i>cn</i>               | <i>bu</i> | $\frac{n_l}{bu}$ | <i>lf</i> | <i>tr</i> | <i>lt</i> | <i>tt</i> | <i>as</i> | Time     | Gap        | Volt | Ampere |
| 2586 | Soest                   | 4000      | 1.056            | 1.34      | 0.75      | 4         | 4         | 0.31      | 0:46:45  | 0.0        | y    | y      |
| 2587 | Dortmund                | 4000      | 1.069            | 1.34      | 0.75      | 4         | 4         | 0.39      | 0:48:31  | 0.0        | y    | y      |
| 2588 | Kassel                  | 4000      | 1.070            | 1.34      | 0.75      | 4         | 4         | 0.3       | 1:13:10  | 0.0        | y    | y      |
| 2589 | Hannover                | 4000      | 1.146            | 1.34      | 0.75      | 4         | 4         | 0.31      | 1:45:54  | 0.0        | y    | y      |
| 2590 | Krefeld                 | 4000      | 1.099            | 1.34      | 0.75      | 4         | 4         | 0.37      | *        | *          | *    | *      |
| 2591 | Münster                 | 4000      | 1.063            | 1.34      | 0.75      | 4         | 4         | 0.34      | *        | *          | *    | *      |
| 2592 | Paderborn               | 4000      | 1.046            | 1.34      | 0.75      | 4         | 4         | 0.35      | 3:10:18  | 0.0        | y    | y      |
| 2593 | Detmold                 | 4000      | 1.050            | 1.34      | 0.75      | 4         | 4         | 0.34      | *        | *          | *    | *      |
| 2594 | Bielefeld               | 4000      | 1.048            | 1.34      | 0.75      | 4         | 4         | 0.37      | *        | *          | *    | *      |
| 2595 | Gütersloh               | 4000      | 1.062            | 1.34      | 0.75      | 4         | 4         | 0.34      | *        | *          | *    | *      |
| 2596 | Soest                   | 4000      | 1.056            | 1.34      | 0.75      | 4         | 4         | 0.37      | 1:26:25  | 0.0        | y    | y      |
| 2597 | Dortmund                | 4000      | 1.069            | 1.34      | 0.75      | 4         | 4         | 0.35      | 9:17:41  | 0.14       | y    | y      |
| 2598 | Kassel                  | 4000      | 1.070            | 1.34      | 0.75      | 4         | 4         | 0.35      | 1:33:26  | 0.0        | y    | y      |
| 2599 | Hannover                | 4000      | 1.146            | 1.34      | 0.75      | 4         | 4         | 0.37      | *        | *          | *    | *      |
| 2600 | Krefeld                 | 4000      | 1.099            | 1.34      | 0.75      | 4         | 4         | 0.35      | *        | *          | *    | *      |
| 2601 | Münster                 | 4000      | 1.063            | 1.34      | 0.75      | 4         | 4         | 0.42      | *        | *          | *    | *      |
| 2602 | Paderborn               | 4000      | 1.046            | 1.34      | 0.75      | 4         | 4         | 0.43      | *        | *          | *    | *      |
| 2603 | Detmold                 | 4000      | 1.050            | 1.34      | 0.75      | 4         | 4         | 0.42      | *        | *          | *    | *      |
| 2604 | Bielefeld               | 4000      | 1.048            | 1.34      | 0.75      | 4         | 4         | 0.42      | *        | *          | *    | *      |
| 2605 | Gütersloh               | 4000      | 1.062            | 1.34      | 0.75      | 4         | 4         | 0.43      | *        | *          | *    | *      |
| 2606 | Soest                   | 4000      | 1.056            | 1.34      | 0.75      | 4         | 4         | 0.41      | *        | *          | *    | *      |
| 2607 | Dortmund                | 4000      | 1.069            | 1.34      | 0.75      | 4         | 4         | 0.42      | *        | *          | *    | *      |
| 2608 | Kassel                  | 4000      | 1.070            | 1.34      | 0.75      | 4         | 4         | 0.4       | *        | *          | *    | *      |
| 2609 | Hannover                | 4000      | 1.146            | 1.34      | 0.75      | 4         | 4         | 0.43      | *        | *          | *    | *      |
| 2610 | Krefeld                 | 4000      | 1.099            | 1.34      | 0.75      | 4         | 4         | 0.42      | *        | *          | *    | *      |
| 2611 | Münster                 | 4000      | 1.063            | 1.0       | 0.75      | 2         | 2         | 0.28      | 0:18:22  | 0.0        | y    | y      |
| 2612 | Paderborn               | 4000      | 1.046            | 1.0       | 0.75      | 2         | 2         | 0.28      | 0:14:02  | 0.0        | y    | y      |
| 2613 | Detmold                 | 4000      | 1.050            | 1.0       | 0.75      | 2         | 2         | 0.25      | 0:21:50  | 0.0        | y    | y      |
| 2614 | Bielefeld               | 4000      | 1.048            | 1.0       | 0.75      | 2         | 2         | 0.22      | 0:18:47  | 0.0        | y    | y      |
| 2615 | Gütersloh               | 4000      | 1.062            | 1.0       | 0.75      | 2         | 2         | 0.26      | 0:45:07  | 0.4        | y    | y      |
| 2616 | Soest                   | 4000      | 1.056            | 1.0       | 0.75      | 2         | 2         | 0.26      | 0:25:47  | 0.0        | y    | y      |
| 2617 | Dortmund                | 4000      | 1.069            | 1.0       | 0.75      | 2         | 2         | 0.27      | 0:23:29  | 0.0        | y    | y      |
| 2618 | Kassel                  | 4000      | 1.070            | 1.0       | 0.75      | 2         | 2         | 0.25      | 0:31:16  | 0.0        | y    | y      |
| 2619 | Hannover                | 4000      | 1.146            | 1.0       | 0.75      | 2         | 2         | 0.29      | 2:28:14  | 0.0        | y    | y      |
| 2620 | Krefeld                 | 4000      | 1.099            | 1.0       | 0.75      | 2         | 2         | 0.31      | 4:15:07  | 0.18       | y    | y      |
| 2621 | Münster                 | 4000      | 1.063            | 1.0       | 0.75      | 2         | 2         | 0.31      | 3:17:57  | 0.0        | y    | y      |
| 2622 | Paderborn               | 4000      | 1.046            | 1.0       | 0.75      | 2         | 2         | 0.31      | 0:09:22  | 0.0        | y    | y      |
| 2623 | Detmold                 | 4000      | 1.050            | 1.0       | 0.75      | 2         | 2         | 0.3       | 0:55:07  | 0.22       | y    | y      |
| 2624 | Bielefeld               | 4000      | 1.047            | 1.0       | 0.75      | 2         | 2         | 0.34      | 0:08:30  | 0.0        | y    | y      |
| 2625 | Gütersloh               | 4000      | 1.062            | 1.0       | 0.75      | 2         | 2         | 0.31      | 0:21:07  | 0.0        | y    | y      |
| 2626 | Soest                   | 4000      | 1.056            | 1.0       | 0.75      | 2         | 2         | 0.3       | 14:54:01 | 0.0        | y    | y      |
| 2627 | Dortmund                | 4000      | 1.069            | 1.0       | 0.75      | 2         | 2         | 0.34      | 0:08:19  | 0.0        | y    | y      |
| 2628 | Kassel                  | 4000      | 1.070            | 1.0       | 0.75      | 2         | 2         | 0.32      | 4:05:34  | 0.0        | y    | y      |
| 2629 | Hannover                | 4000      | 1.146            | 1.0       | 0.75      | 2         | 2         | 0.31      | 1:40:44  | 0.0        | y    | y      |
| 2630 | Krefeld                 | 4000      | 1.099            | 1.0       | 0.75      | 2         | 2         | 0.34      | *        | *          | *    | *      |
| 2631 | Münster                 | 4000      | 1.063            | 1.0       | 0.75      | 2         | 2         | 0.4       | 0:22:34  | 0.0        | y    | y      |
| 2632 | Paderborn               | 4000      | 1.046            | 1.0       | 0.75      | 2         | 2         | 0.39      | *        | *          | *    | *      |
| 2633 | Detmold                 | 4000      | 1.050            | 1.0       | 0.75      | 2         | 2         | 0.38      | *        | *          | *    | *      |
| 2634 | Bielefeld               | 4000      | 1.048            | 1.0       | 0.75      | 2         | 2         | 0.38      | 2:18:44  | 0.0        | y    | y      |
| 2635 | Gütersloh               | 4000      | 1.062            | 1.0       | 0.75      | 2         | 2         | 0.39      | *        | *          | *    | *      |
| 2636 | Soest                   | 4000      | 1.056            | 1.0       | 0.75      | 2         | 2         | 0.39      | 0:35:28  | 0.0        | y    | y      |
| 2637 | Dortmund                | 4000      | 1.069            | 1.0       | 0.75      | 2         | 2         | 0.39      | *        | *          | *    | *      |

| #    | Network characteristics |           |                  |           |           |           |           |           | Solution |      | Simulation |        |
|------|-------------------------|-----------|------------------|-----------|-----------|-----------|-----------|-----------|----------|------|------------|--------|
|      | <i>cn</i>               | <i>bu</i> | $\frac{n_l}{bu}$ | <i>lf</i> | <i>tr</i> | <i>lt</i> | <i>tt</i> | <i>as</i> | Time     | Gap  | Volt       | Ampere |
| 2638 | Kassel                  | 4000      | 1.070            | 1.0       | 0.75      | 2         | 2         | 0.37      | 13:43:39 | 0.0  | y          | y      |
| 2639 | Hannover                | 4000      | 1.146            | 1.0       | 0.75      | 2         | 2         | 0.37      | 3:45:44  | 0.0  | y          | y      |
| 2640 | Krefeld                 | 4000      | 1.099            | 1.0       | 0.75      | 2         | 2         | 0.36      | *        | *    | *          | *      |
| 2641 | Münster                 | 4000      | 1.063            | 1.0       | 0.75      | 3         | 3         | 0.42      | 0:11:23  | 0.0  | y          | y      |
| 2642 | Paderborn               | 4000      | 1.046            | 1.0       | 0.75      | 3         | 3         | 0.31      | 0:09:26  | 0.28 | y          | y      |
| 2643 | Detmold                 | 4000      | 1.050            | 1.0       | 0.75      | 3         | 3         | 0.27      | 0:27:50  | 0.0  | y          | y      |
| 2644 | Bielefeld               | 4000      | 1.048            | 1.0       | 0.75      | 3         | 3         | 0.25      | 0:14:34  | 0.0  | y          | y      |
| 2645 | Gütersloh               | 4000      | 1.062            | 1.0       | 0.75      | 3         | 3         | 0.29      | 0:50:09  | 0.0  | y          | y      |
| 2646 | Soest                   | 4000      | 1.056            | 1.0       | 0.75      | 3         | 3         | 0.29      | 0:37:27  | 0.0  | y          | y      |
| 2647 | Dortmund                | 4000      | 1.069            | 1.0       | 0.75      | 3         | 3         | 0.32      | 3:07:00  | 0.0  | y          | y      |
| 2648 | Kassel                  | 4000      | 1.070            | 1.0       | 0.75      | 3         | 3         | 0.27      | 0:24:55  | 0.0  | y          | y      |
| 2649 | Hannover                | 4000      | 1.146            | 1.0       | 0.75      | 3         | 3         | 0.28      | 0:10:10  | 0.0  | y          | y      |
| 2650 | Krefeld                 | 4000      | 1.099            | 1.0       | 0.75      | 3         | 3         | 0.34      | 6:22:50  | 0.0  | y          | y      |
| 2651 | Münster                 | 4000      | 1.063            | 1.0       | 0.75      | 3         | 3         | 0.33      | 11:40:26 | 0.4  | y          | y      |
| 2652 | Paderborn               | 4000      | 1.046            | 1.0       | 0.75      | 3         | 3         | 0.38      | 0:15:54  | 0.0  | y          | y      |
| 2653 | Detmold                 | 4000      | 1.050            | 1.0       | 0.75      | 3         | 3         | 0.32      | *        | *    | *          | *      |
| 2654 | Bielefeld               | 4000      | 1.047            | 1.0       | 0.75      | 3         | 3         | 0.37      | 0:15:32  | 0.0  | y          | y      |
| 2655 | Gütersloh               | 4000      | 1.062            | 1.0       | 0.75      | 3         | 3         | 0.32      | 5:10:28  | 0.0  | y          | y      |
| 2656 | Soest                   | 4000      | 1.056            | 1.0       | 0.75      | 3         | 3         | 0.32      | *        | *    | *          | *      |
| 2657 | Dortmund                | 4000      | 1.069            | 1.0       | 0.75      | 3         | 3         | 0.36      | 9:51:11  | 0.0  | y          | y      |
| 2658 | Kassel                  | 4000      | 1.070            | 1.0       | 0.75      | 3         | 3         | 0.33      | 1:01:35  | 0.0  | y          | y      |
| 2659 | Hannover                | 4000      | 1.146            | 1.0       | 0.75      | 3         | 3         | 0.34      | 1:08:43  | 0.0  | y          | y      |
| 2660 | Krefeld                 | 4000      | 1.099            | 1.0       | 0.75      | 3         | 3         | 0.33      | *        | *    | *          | *      |
| 2661 | Münster                 | 4000      | 1.063            | 1.0       | 0.75      | 3         | 3         | 0.42      | 39:13:57 | 0.0  | y          | y      |
| 2662 | Paderborn               | 4000      | 1.046            | 1.0       | 0.75      | 3         | 3         | 0.41      | *        | *    | *          | *      |
| 2663 | Detmold                 | 4000      | 1.050            | 1.0       | 0.75      | 3         | 3         | 0.4       | *        | *    | *          | *      |
| 2664 | Bielefeld               | 4000      | 1.048            | 1.0       | 0.75      | 3         | 3         | 0.4       | *        | *    | *          | *      |
| 2665 | Gütersloh               | 4000      | 1.062            | 1.0       | 0.75      | 3         | 3         | 0.38      | *        | *    | *          | *      |
| 2666 | Soest                   | 4000      | 1.056            | 1.0       | 0.75      | 3         | 3         | 0.39      | 2:15:42  | 0.0  | y          | y      |
| 2667 | Dortmund                | 4000      | 1.069            | 1.0       | 0.75      | 3         | 3         | 0.41      | *        | *    | *          | *      |
| 2668 | Kassel                  | 4000      | 1.070            | 1.0       | 0.75      | 3         | 3         | 0.39      | *        | *    | *          | *      |
| 2669 | Hannover                | 4000      | 1.146            | 1.0       | 0.75      | 3         | 3         | 0.41      | *        | *    | *          | *      |
| 2670 | Krefeld                 | 4000      | 1.099            | 1.0       | 0.75      | 3         | 3         | 0.38      | *        | *    | *          | *      |
| 2671 | Münster                 | 4000      | 1.063            | 1.0       | 0.75      | 4         | 4         | 0.31      | 4:18:39  | 0.29 | y          | y      |
| 2672 | Paderborn               | 4000      | 1.046            | 1.0       | 0.75      | 4         | 4         | 0.36      | 0:23:30  | 0.0  | y          | y      |
| 2673 | Detmold                 | 4000      | 1.050            | 1.0       | 0.75      | 4         | 4         | 0.29      | 1:39:02  | 0.0  | y          | y      |
| 2674 | Bielefeld               | 4000      | 1.048            | 1.0       | 0.75      | 4         | 4         | 0.27      | 1:49:55  | 0.0  | y          | y      |
| 2675 | Gütersloh               | 4000      | 1.062            | 1.0       | 0.75      | 4         | 4         | 0.31      | 5:45:59  | 0.23 | y          | y      |
| 2676 | Soest                   | 4000      | 1.056            | 1.0       | 0.75      | 4         | 4         | 0.31      | 0:23:44  | 0.0  | y          | y      |
| 2677 | Dortmund                | 4000      | 1.069            | 1.0       | 0.75      | 4         | 4         | 0.33      | 0:44:00  | 0.0  | y          | y      |
| 2678 | Kassel                  | 4000      | 1.070            | 1.0       | 0.75      | 4         | 4         | 0.3       | 3:16:27  | 0.0  | y          | y      |
| 2679 | Hannover                | 4000      | 1.146            | 1.0       | 0.75      | 4         | 4         | 0.31      | 0:41:49  | 0.0  | y          | y      |
| 2680 | Krefeld                 | 4000      | 1.099            | 1.0       | 0.75      | 4         | 4         | 0.37      | 1:08:58  | 0.03 | y          | y      |
| 2681 | Münster                 | 4000      | 1.063            | 1.0       | 0.75      | 4         | 4         | 0.34      | *        | *    | *          | *      |
| 2682 | Paderborn               | 4000      | 1.046            | 1.0       | 0.75      | 4         | 4         | 0.41      | 0:42:59  | 0.0  | y          | y      |
| 2683 | Detmold                 | 4000      | 1.050            | 1.0       | 0.75      | 4         | 4         | 0.39      | *        | *    | *          | *      |
| 2684 | Bielefeld               | 4000      | 1.047            | 1.0       | 0.75      | 4         | 4         | 0.39      | 1:30:42  | 0.0  | y          | y      |
| 2685 | Gütersloh               | 4000      | 1.062            | 1.0       | 0.75      | 4         | 4         | 0.35      | 0:52:30  | 0.0  | y          | y      |
| 2686 | Soest                   | 4000      | 1.056            | 1.0       | 0.75      | 4         | 4         | 0.34      | *        | *    | *          | *      |
| 2687 | Dortmund                | 4000      | 1.069            | 1.0       | 0.75      | 4         | 4         | 0.39      | 0:35:30  | 0.0  | y          | y      |
| 2688 | Kassel                  | 4000      | 1.070            | 1.0       | 0.75      | 4         | 4         | 0.35      | 8:06:57  | 0.0  | y          | y      |
| 2689 | Hannover                | 4000      | 1.146            | 1.0       | 0.75      | 4         | 4         | 0.35      | *        | *    | *          | *      |

| #    | Network characteristics |           |                 |           |           |           |           | Solution  |          | Simulation |      |        |
|------|-------------------------|-----------|-----------------|-----------|-----------|-----------|-----------|-----------|----------|------------|------|--------|
|      | <i>cn</i>               | <i>bu</i> | $\frac{nl}{bu}$ | <i>lf</i> | <i>tr</i> | <i>lt</i> | <i>tt</i> | <i>as</i> | Time     | Gap        | Volt | Ampere |
| 2690 | Krefeld                 | 4000      | 1.099           | 1.0       | 0.75      | 4         | 4         | 0.35      | 11:56:18 | 0.0        | y    | y      |
| 2691 | Münster                 | 4000      | 1.063           | 1.0       | 0.75      | 4         | 4         | 0.42      | *        | *          | *    | *      |
| 2692 | Paderborn               | 4000      | 1.046           | 1.0       | 0.75      | 4         | 4         | 0.42      | 3:41:05  | 0.08       | y    | y      |
| 2693 | Detmold                 | 4000      | 1.050           | 1.0       | 0.75      | 4         | 4         | 0.42      | *        | *          | *    | *      |
| 2694 | Bielefeld               | 4000      | 1.048           | 1.0       | 0.75      | 4         | 4         | 0.42      | *        | *          | *    | *      |
| 2695 | Gütersloh               | 4000      | 1.062           | 1.0       | 0.75      | 4         | 4         | 0.42      | *        | *          | *    | *      |
| 2696 | Soest                   | 4000      | 1.056           | 1.0       | 0.75      | 4         | 4         | 0.41      | *        | *          | *    | *      |
| 2697 | Dortmund                | 4000      | 1.069           | 1.0       | 0.75      | 4         | 4         | 0.42      | *        | *          | *    | *      |
| 2698 | Kassel                  | 4000      | 1.070           | 1.0       | 0.75      | 4         | 4         | 0.4       | *        | *          | *    | *      |
| 2699 | Hannover                | 4000      | 1.146           | 1.0       | 0.75      | 4         | 4         | 0.43      | 4:32:43  | 0.0        | y    | y      |
| 2700 | Krefeld                 | 4000      | 1.099           | 1.0       | 0.75      | 4         | 4         | 0.42      | *        | *          | *    | *      |
| 2701 | Münster                 | 4000      | 1.065           | 0.83      | 1.0       | 2         | 2         | 0.28      | 0:28:00  | 0.0        | y    | y      |
| 2702 | Paderborn               | 4000      | 1.047           | 0.83      | 1.0       | 2         | 2         | 0.31      | 0:39:46  | 0.0        | y    | y      |
| 2703 | Detmold                 | 4000      | 1.051           | 0.83      | 1.0       | 2         | 2         | 0.27      | 0:12:12  | 0.0        | y    | y      |
| 2704 | Bielefeld               | 4000      | 1.050           | 0.83      | 1.0       | 2         | 2         | 0.23      | 0:09:16  | 0.0        | y    | y      |
| 2705 | Gütersloh               | 4000      | 1.063           | 0.83      | 1.0       | 2         | 2         | 0.23      | 0:40:44  | 0.0        | y    | y      |
| 2706 | Soest                   | 4000      | 1.058           | 0.83      | 1.0       | 2         | 2         | 0.27      | 0:08:13  | 0.0        | y    | y      |
| 2707 | Dortmund                | 4000      | 1.071           | 0.83      | 1.0       | 2         | 2         | 0.25      | 25:32:37 | 0.0        | y    | y      |
| 2708 | Kassel                  | 4000      | 1.071           | 0.83      | 1.0       | 2         | 2         | 0.24      | 0:17:54  | 0.0        | y    | y      |
| 2709 | Hannover                | 4000      | 1.147           | 0.83      | 1.0       | 2         | 2         | 0.22      | 1:22:02  | 0.0        | y    | y      |
| 2710 | Krefeld                 | 4000      | 1.102           | 0.83      | 1.0       | 2         | 2         | 0.21      | 1:09:49  | 0.0        | y    | y      |
| 2711 | Münster                 | 4000      | 1.065           | 0.83      | 1.0       | 2         | 2         | 0.28      | 0:15:59  | 0.0        | y    | y      |
| 2712 | Paderborn               | 4000      | 1.047           | 0.83      | 1.0       | 2         | 2         | 0.31      | 0:30:37  | 0.0        | y    | y      |
| 2713 | Detmold                 | 4000      | 1.051           | 0.83      | 1.0       | 2         | 2         | 0.29      | 0:33:47  | 0.0        | y    | y      |
| 2714 | Bielefeld               | 4000      | 1.050           | 0.83      | 1.0       | 2         | 2         | 0.29      | 0:17:33  | 0.0        | y    | y      |
| 2715 | Gütersloh               | 4000      | 1.063           | 0.83      | 1.0       | 2         | 2         | 0.3       | 6:18:51  | 0.0        | y    | y      |
| 2716 | Soest                   | 4000      | 1.058           | 0.83      | 1.0       | 2         | 2         | 0.33      | 0:14:51  | 0.0        | y    | y      |
| 2717 | Dortmund                | 4000      | 1.071           | 0.83      | 1.0       | 2         | 2         | 0.32      | 0:59:23  | 0.0        | y    | y      |
| 2718 | Kassel                  | 4000      | 1.071           | 0.83      | 1.0       | 2         | 2         | 0.31      | 11:32:07 | 0.0        | y    | y      |
| 2719 | Hannover                | 4000      | 1.148           | 0.83      | 1.0       | 2         | 2         | 0.27      | *        | *          | *    | *      |
| 2720 | Krefeld                 | 4000      | 1.101           | 0.83      | 1.0       | 2         | 2         | 0.31      | 2:33:42  | 0.27       | y    | y      |
| 2721 | Münster                 | 4000      | 1.065           | 0.83      | 1.0       | 2         | 2         | 0.37      | 0:41:43  | 0.0        | y    | y      |
| 2722 | Paderborn               | 4000      | 1.047           | 0.83      | 1.0       | 2         | 2         | 0.37      | 0:27:44  | 0.0        | y    | y      |
| 2723 | Detmold                 | 4000      | 1.051           | 0.83      | 1.0       | 2         | 2         | 0.36      | 0:52:12  | 0.0        | y    | y      |
| 2724 | Bielefeld               | 4000      | 1.049           | 0.83      | 1.0       | 2         | 2         | 0.37      | 0:17:16  | 0.0        | y    | y      |
| 2725 | Gütersloh               | 4000      | 1.063           | 0.83      | 1.0       | 2         | 2         | 0.37      | 7:15:16  | 0.15       | y    | y      |
| 2726 | Soest                   | 4000      | 1.058           | 0.83      | 1.0       | 2         | 2         | 0.36      | 1:17:28  | 0.0        | y    | y      |
| 2727 | Dortmund                | 4000      | 1.071           | 0.83      | 1.0       | 2         | 2         | 0.38      | *        | *          | *    | *      |
| 2728 | Kassel                  | 4000      | 1.071           | 0.83      | 1.0       | 2         | 2         | 0.38      | 44:35:31 | 0.5        | y    | y      |
| 2729 | Hannover                | 4000      | 1.147           | 0.83      | 1.0       | 2         | 2         | 0.37      | 1:24:27  | 0.0        | y    | y      |
| 2730 | Krefeld                 | 4000      | 1.101           | 0.83      | 1.0       | 2         | 2         | 0.36      | 1:22:14  | 0.0        | y    | y      |
| 2731 | Münster                 | 4000      | 1.065           | 0.83      | 1.0       | 3         | 3         | 0.34      | 0:31:07  | 0.0        | y    | y      |
| 2732 | Paderborn               | 4000      | 1.047           | 0.83      | 1.0       | 3         | 3         | 0.34      | 0:19:15  | 0.0        | y    | y      |
| 2733 | Detmold                 | 4000      | 1.052           | 0.83      | 1.0       | 3         | 3         | 0.27      | 0:09:57  | 0.0        | y    | y      |
| 2734 | Bielefeld               | 4000      | 1.050           | 0.83      | 1.0       | 3         | 3         | 0.26      | 0:15:22  | 0.0        | y    | y      |
| 2735 | Gütersloh               | 4000      | 1.063           | 0.83      | 1.0       | 3         | 3         | 0.31      | 0:28:12  | 0.0        | y    | y      |
| 2736 | Soest                   | 4000      | 1.058           | 0.83      | 1.0       | 3         | 3         | 0.26      | 0:08:59  | 0.0        | y    | y      |
| 2737 | Dortmund                | 4000      | 1.071           | 0.83      | 1.0       | 3         | 3         | 0.25      | 0:53:31  | 0.0        | y    | y      |
| 2738 | Kassel                  | 4000      | 1.071           | 0.83      | 1.0       | 3         | 3         | 0.27      | 0:20:35  | 0.0        | y    | y      |
| 2739 | Hannover                | 4000      | 1.147           | 0.83      | 1.0       | 3         | 3         | 0.25      | 1:12:23  | 0.0        | y    | y      |
| 2740 | Krefeld                 | 4000      | 1.101           | 0.83      | 1.0       | 3         | 3         | 0.34      | 0:51:51  | 0.0        | y    | y      |
| 2741 | Münster                 | 4000      | 1.065           | 0.83      | 1.0       | 3         | 3         | 0.35      | 1:56:05  | 0.0        | y    | y      |

| #    | Network characteristics |           |                  |           |           |           |           |           | Solution |      | Simulation |        |
|------|-------------------------|-----------|------------------|-----------|-----------|-----------|-----------|-----------|----------|------|------------|--------|
|      | <i>cn</i>               | <i>bu</i> | $\frac{n_l}{bu}$ | <i>lf</i> | <i>tr</i> | <i>lt</i> | <i>tt</i> | <i>as</i> | Time     | Gap  | Volt       | Ampere |
| 2742 | Paderborn               | 4000      | 1.047            | 0.83      | 1.0       | 3         | 3         | 0.33      | 3:10:53  | 0.0  | y          | y      |
| 2743 | Detmold                 | 4000      | 1.051            | 0.83      | 1.0       | 3         | 3         | 0.31      | 1:52:21  | 0.0  | y          | y      |
| 2744 | Bielefeld               | 4000      | 1.050            | 0.83      | 1.0       | 3         | 3         | 0.31      | 0:26:28  | 0.0  | y          | y      |
| 2745 | Gütersloh               | 4000      | 1.063            | 0.83      | 1.0       | 3         | 3         | 0.32      | 6:52:09  | 0.0  | y          | y      |
| 2746 | Soest                   | 4000      | 1.058            | 0.83      | 1.0       | 3         | 3         | 0.3       | 5:59:31  | 0.0  | y          | y      |
| 2747 | Dortmund                | 4000      | 1.071            | 0.83      | 1.0       | 3         | 3         | 0.31      | *        | *    | *          | *      |
| 2748 | Kassel                  | 4000      | 1.071            | 0.83      | 1.0       | 3         | 3         | 0.32      | *        | *    | *          | *      |
| 2749 | Hannover                | 4000      | 1.147            | 0.83      | 1.0       | 3         | 3         | 0.28      | 5:05:54  | 0.0  | y          | y      |
| 2750 | Krefeld                 | 4000      | 1.102            | 0.83      | 1.0       | 3         | 3         | 0.3       | *        | *    | *          | *      |
| 2751 | Münster                 | 4000      | 1.065            | 0.83      | 1.0       | 3         | 3         | 0.39      | 12:25:00 | 0.22 | y          | y      |
| 2752 | Paderborn               | 4000      | 1.047            | 0.83      | 1.0       | 3         | 3         | 0.39      | 8:42:16  | 0.0  | n          | y      |
| 2753 | Detmold                 | 4000      | 1.051            | 0.83      | 1.0       | 3         | 3         | 0.37      | 2:54:39  | 0.32 | y          | y      |
| 2754 | Bielefeld               | 4000      | 1.050            | 0.83      | 1.0       | 3         | 3         | 0.37      | 7:19:17  | 0.0  | y          | y      |
| 2755 | Gütersloh               | 4000      | 1.063            | 0.83      | 1.0       | 3         | 3         | 0.39      | 1:11:57  | 0.0  | y          | y      |
| 2756 | Soest                   | 4000      | 1.058            | 0.83      | 1.0       | 3         | 3         | 0.37      | 1:32:58  | 0.0  | y          | y      |
| 2757 | Dortmund                | 4000      | 1.071            | 0.83      | 1.0       | 3         | 3         | 0.39      | 8:56:49  | 0.0  | y          | y      |
| 2758 | Kassel                  | 4000      | 1.071            | 0.83      | 1.0       | 3         | 3         | 0.4       | 2:40:32  | 0.0  | y          | y      |
| 2759 | Hannover                | 4000      | 1.147            | 0.83      | 1.0       | 3         | 3         | 0.38      | 2:56:57  | 0.0  | y          | y      |
| 2760 | Krefeld                 | 4000      | 1.101            | 0.83      | 1.0       | 3         | 3         | 0.39      | *        | *    | *          | *      |
| 2761 | Münster                 | 4000      | 1.065            | 0.83      | 1.0       | 4         | 4         | 0.37      | 0:50:24  | 0.0  | y          | y      |
| 2762 | Paderborn               | 4000      | 1.047            | 0.83      | 1.0       | 4         | 4         | 0.37      | 0:53:55  | 0.0  | y          | y      |
| 2763 | Detmold                 | 4000      | 1.051            | 0.83      | 1.0       | 4         | 4         | 0.32      | 0:16:12  | 0.0  | y          | y      |
| 2764 | Bielefeld               | 4000      | 1.050            | 0.83      | 1.0       | 4         | 4         | 0.28      | 0:16:03  | 0.0  | y          | y      |
| 2765 | Gütersloh               | 4000      | 1.063            | 0.83      | 1.0       | 4         | 4         | 0.34      | 0:43:09  | 0.0  | y          | y      |
| 2766 | Soest                   | 4000      | 1.058            | 0.83      | 1.0       | 4         | 4         | 0.31      | 0:09:24  | 0.32 | y          | y      |
| 2767 | Dortmund                | 4000      | 1.071            | 0.83      | 1.0       | 4         | 4         | 0.27      | 0:19:29  | 0.0  | y          | y      |
| 2768 | Kassel                  | 4000      | 1.071            | 0.83      | 1.0       | 4         | 4         | 0.29      | 1:02:53  | 0.0  | y          | y      |
| 2769 | Hannover                | 4000      | 1.147            | 0.83      | 1.0       | 4         | 4         | 0.27      | 2:05:33  | 0.0  | y          | y      |
| 2770 | Krefeld                 | 4000      | 1.101            | 0.83      | 1.0       | 4         | 4         | 0.36      | 0:30:26  | 0.0  | y          | y      |
| 2771 | Münster                 | 4000      | 1.065            | 0.83      | 1.0       | 4         | 4         | 0.32      | 7:59:51  | 0.12 | y          | y      |
| 2772 | Paderborn               | 4000      | 1.047            | 0.83      | 1.0       | 4         | 4         | 0.34      | 0:55:36  | 0.0  | y          | y      |
| 2773 | Detmold                 | 4000      | 1.051            | 0.83      | 1.0       | 4         | 4         | 0.33      | *        | *    | *          | *      |
| 2774 | Bielefeld               | 4000      | 1.050            | 0.83      | 1.0       | 4         | 4         | 0.33      | 7:36:55  | 0.0  | y          | y      |
| 2775 | Gütersloh               | 4000      | 1.063            | 0.83      | 1.0       | 4         | 4         | 0.34      | 17:24:34 | 0.0  | y          | y      |
| 2776 | Soest                   | 4000      | 1.058            | 0.83      | 1.0       | 4         | 4         | 0.32      | 6:29:52  | 0.0  | y          | y      |
| 2777 | Dortmund                | 4000      | 1.071            | 0.83      | 1.0       | 4         | 4         | 0.35      | 8:31:37  | 0.0  | y          | y      |
| 2778 | Kassel                  | 4000      | 1.071            | 0.83      | 1.0       | 4         | 4         | 0.34      | *        | *    | *          | *      |
| 2779 | Hannover                | 4000      | 1.147            | 0.83      | 1.0       | 4         | 4         | 0.29      | 2:00:39  | 0.0  | y          | y      |
| 2780 | Krefeld                 | 4000      | 1.101            | 0.83      | 1.0       | 4         | 4         | 0.35      | *        | *    | *          | *      |
| 2781 | Münster                 | 4000      | 1.065            | 0.83      | 1.0       | 4         | 4         | 0.4       | *        | *    | *          | *      |
| 2782 | Paderborn               | 4000      | 1.047            | 0.83      | 1.0       | 4         | 4         | 0.41      | *        | *    | *          | *      |
| 2783 | Detmold                 | 4000      | 1.051            | 0.83      | 1.0       | 4         | 4         | 0.39      | 3:36:18  | 0.0  | y          | y      |
| 2784 | Bielefeld               | 4000      | 1.050            | 0.83      | 1.0       | 4         | 4         | 0.38      | 1:01:08  | 0.0  | y          | y      |
| 2785 | Gütersloh               | 4000      | 1.063            | 0.83      | 1.0       | 4         | 4         | 0.4       | *        | *    | *          | *      |
| 2786 | Soest                   | 4000      | 1.058            | 0.83      | 1.0       | 4         | 4         | 0.39      | 2:55:41  | 0.0  | y          | y      |
| 2787 | Dortmund                | 4000      | 1.071            | 0.83      | 1.0       | 4         | 4         | 0.4       | *        | *    | *          | *      |
| 2788 | Kassel                  | 4000      | 1.071            | 0.83      | 1.0       | 4         | 4         | 0.41      | *        | *    | *          | *      |
| 2789 | Hannover                | 4000      | 1.147            | 0.83      | 1.0       | 4         | 4         | 0.4       | *        | *    | *          | *      |
| 2790 | Krefeld                 | 4000      | 1.101            | 0.83      | 1.0       | 4         | 4         | 0.39      | *        | *    | *          | *      |
| 2791 | Münster                 | 4000      | 1.065            | 1.34      | 1.0       | 2         | 2         | 0.22      | 0:17:38  | 0.0  | y          | y      |
| 2792 | Paderborn               | 4000      | 1.047            | 1.34      | 1.0       | 2         | 2         | 0.31      | 0:16:50  | 0.0  | y          | y      |
| 2793 | Detmold                 | 4000      | 1.051            | 1.34      | 1.0       | 2         | 2         | 0.27      | 0:08:52  | 0.0  | y          | y      |

| #    | Network characteristics |           |                  |           |           |           |           |           | Solution |      | Simulation |        |
|------|-------------------------|-----------|------------------|-----------|-----------|-----------|-----------|-----------|----------|------|------------|--------|
|      | <i>cn</i>               | <i>bu</i> | $\frac{n_l}{bu}$ | <i>lf</i> | <i>tr</i> | <i>lt</i> | <i>tt</i> | <i>as</i> | Time     | Gap  | Volt       | Ampere |
| 2794 | Bielefeld               | 4000      | 1.049            | 1.34      | 1.0       | 2         | 2         | 0.28      | 0:14:40  | 0.0  | y          | y      |
| 2795 | Gütersloh               | 4000      | 1.063            | 1.34      | 1.0       | 2         | 2         | 0.28      | 0:35:11  | 0.0  | y          | y      |
| 2796 | Soest                   | 4000      | 1.058            | 1.34      | 1.0       | 2         | 2         | 0.26      | 0:26:09  | 0.0  | y          | y      |
| 2797 | Dortmund                | 4000      | 1.071            | 1.34      | 1.0       | 2         | 2         | 0.25      | 38:31:28 | 0.0  | y          | y      |
| 2798 | Kassel                  | 4000      | 1.071            | 1.34      | 1.0       | 2         | 2         | 0.24      | 1:07:12  | 0.07 | n          | y      |
| 2799 | Hannover                | 4000      | 1.147            | 1.34      | 1.0       | 2         | 2         | 0.22      | 5:22:07  | 0.0  | y          | y      |
| 2800 | Krefeld                 | 4000      | 1.101            | 1.34      | 1.0       | 2         | 2         | 0.3       | 1:12:18  | 0.16 | y          | y      |
| 2801 | Münster                 | 4000      | 1.065            | 1.34      | 1.0       | 2         | 2         | 0.33      | 1:05:50  | 0.0  | y          | y      |
| 2802 | Paderborn               | 4000      | 1.047            | 1.34      | 1.0       | 2         | 2         | 0.31      | 2:22:50  | 0.0  | y          | y      |
| 2803 | Detmold                 | 4000      | 1.051            | 1.34      | 1.0       | 2         | 2         | 0.29      | 2:00:26  | 0.0  | y          | y      |
| 2804 | Bielefeld               | 4000      | 1.050            | 1.34      | 1.0       | 2         | 2         | 0.29      | 1:25:58  | 0.36 | y          | y      |
| 2805 | Gütersloh               | 4000      | 1.063            | 1.34      | 1.0       | 2         | 2         | 0.3       | 10:17:47 | 0.39 | y          | y      |
| 2806 | Soest                   | 4000      | 1.058            | 1.34      | 1.0       | 2         | 2         | 0.28      | 1:22:28  | 0.0  | y          | y      |
| 2807 | Dortmund                | 4000      | 1.071            | 1.34      | 1.0       | 2         | 2         | 0.32      | 2:33:33  | 0.0  | y          | y      |
| 2808 | Kassel                  | 4000      | 1.071            | 1.34      | 1.0       | 2         | 2         | 0.31      | *        | *    | *          | *      |
| 2809 | Hannover                | 4000      | 1.147            | 1.34      | 1.0       | 2         | 2         | 0.26      | 2:16:48  | 0.14 | y          | y      |
| 2810 | Krefeld                 | 4000      | 1.102            | 1.34      | 1.0       | 2         | 2         | 0.28      | *        | *    | *          | *      |
| 2811 | Münster                 | 4000      | 1.065            | 1.34      | 1.0       | 2         | 2         | 0.37      | 2:42:57  | 0.0  | y          | y      |
| 2812 | Paderborn               | 4000      | 1.047            | 1.34      | 1.0       | 2         | 2         | 0.38      | 7:00:31  | 0.43 | n          | y      |
| 2813 | Detmold                 | 4000      | 1.051            | 1.34      | 1.0       | 2         | 2         | 0.36      | 1:15:11  | 0.0  | y          | y      |
| 2814 | Bielefeld               | 4000      | 1.050            | 1.34      | 1.0       | 2         | 2         | 0.35      | 0:25:05  | 0.0  | y          | y      |
| 2815 | Gütersloh               | 4000      | 1.063            | 1.34      | 1.0       | 2         | 2         | 0.37      | 11:48:09 | 0.13 | y          | y      |
| 2816 | Soest                   | 4000      | 1.058            | 1.34      | 1.0       | 2         | 2         | 0.36      | *        | *    | *          | *      |
| 2817 | Dortmund                | 4000      | 1.071            | 1.34      | 1.0       | 2         | 2         | 0.37      | *        | *    | *          | *      |
| 2818 | Kassel                  | 4000      | 1.071            | 1.34      | 1.0       | 2         | 2         | 0.38      | 2:30:31  | 0.0  | y          | y      |
| 2819 | Hannover                | 4000      | 1.147            | 1.34      | 1.0       | 2         | 2         | 0.37      | *        | *    | *          | *      |
| 2820 | Krefeld                 | 4000      | 1.102            | 1.34      | 1.0       | 2         | 2         | 0.37      | *        | *    | *          | *      |
| 2821 | Münster                 | 4000      | 1.065            | 1.34      | 1.0       | 3         | 3         | 0.28      | 1:28:58  | 0.0  | y          | y      |
| 2822 | Paderborn               | 4000      | 1.047            | 1.34      | 1.0       | 3         | 3         | 0.28      | 0:20:01  | 0.0  | y          | y      |
| 2823 | Detmold                 | 4000      | 1.051            | 1.34      | 1.0       | 3         | 3         | 0.3       | 0:29:31  | 0.0  | y          | y      |
| 2824 | Bielefeld               | 4000      | 1.050            | 1.34      | 1.0       | 3         | 3         | 0.26      | 0:15:43  | 0.0  | y          | y      |
| 2825 | Gütersloh               | 4000      | 1.063            | 1.34      | 1.0       | 3         | 3         | 0.31      | 0:28:14  | 0.0  | y          | y      |
| 2826 | Soest                   | 4000      | 1.058            | 1.34      | 1.0       | 3         | 3         | 0.3       | 0:08:49  | 0.0  | y          | y      |
| 2827 | Dortmund                | 4000      | 1.071            | 1.34      | 1.0       | 3         | 3         | 0.25      | 0:44:49  | 0.0  | y          | y      |
| 2828 | Kassel                  | 4000      | 1.071            | 1.34      | 1.0       | 3         | 3         | 0.27      | 43:47:43 | 0.44 | y          | y      |
| 2829 | Hannover                | 4000      | 1.147            | 1.34      | 1.0       | 3         | 3         | 0.25      | 1:56:03  | 0.0  | y          | y      |
| 2830 | Krefeld                 | 4000      | 1.101            | 1.34      | 1.0       | 3         | 3         | 0.34      | *        | *    | *          | *      |
| 2831 | Münster                 | 4000      | 1.065            | 1.34      | 1.0       | 3         | 3         | 0.35      | 5:14:37  | 0.0  | y          | y      |
| 2832 | Paderborn               | 4000      | 1.047            | 1.34      | 1.0       | 3         | 3         | 0.32      | 0:26:16  | 0.13 | y          | y      |
| 2833 | Detmold                 | 4000      | 1.052            | 1.34      | 1.0       | 3         | 3         | 0.33      | 3:02:41  | 0.09 | y          | y      |
| 2834 | Bielefeld               | 4000      | 1.050            | 1.34      | 1.0       | 3         | 3         | 0.31      | 8:54:40  | 0.0  | y          | y      |
| 2835 | Gütersloh               | 4000      | 1.063            | 1.34      | 1.0       | 3         | 3         | 0.32      | *        | *    | *          | *      |
| 2836 | Soest                   | 4000      | 1.058            | 1.34      | 1.0       | 3         | 3         | 0.36      | 6:00:10  | 0.0  | y          | y      |
| 2837 | Dortmund                | 4000      | 1.071            | 1.34      | 1.0       | 3         | 3         | 0.31      | 0:27:50  | 0.0  | y          | y      |
| 2838 | Kassel                  | 4000      | 1.071            | 1.34      | 1.0       | 3         | 3         | 0.32      | *        | *    | *          | *      |
| 2839 | Hannover                | 4000      | 1.148            | 1.34      | 1.0       | 3         | 3         | 0.31      | 8:18:00  | 0.0  | y          | y      |
| 2840 | Krefeld                 | 4000      | 1.101            | 1.34      | 1.0       | 3         | 3         | 0.33      | 5:20:44  | 0.0  | y          | y      |
| 2841 | Münster                 | 4000      | 1.065            | 1.34      | 1.0       | 3         | 3         | 0.39      | 2:04:01  | 0.0  | y          | y      |
| 2842 | Paderborn               | 4000      | 1.047            | 1.34      | 1.0       | 3         | 3         | 0.39      | *        | *    | *          | *      |
| 2843 | Detmold                 | 4000      | 1.052            | 1.34      | 1.0       | 3         | 3         | 0.37      | *        | *    | *          | *      |
| 2844 | Bielefeld               | 4000      | 1.050            | 1.34      | 1.0       | 3         | 3         | 0.37      | 0:36:29  | 0.0  | y          | y      |
| 2845 | Gütersloh               | 4000      | 1.064            | 1.34      | 1.0       | 3         | 3         | 0.39      | *        | *    | *          | *      |

| #    | Network characteristics |           |                 |           |           |           |           |           | Solution |      | Simulation |        |
|------|-------------------------|-----------|-----------------|-----------|-----------|-----------|-----------|-----------|----------|------|------------|--------|
|      | <i>cn</i>               | <i>bu</i> | $\frac{nl}{bu}$ | <i>lf</i> | <i>tr</i> | <i>lt</i> | <i>tt</i> | <i>as</i> | Time     | Gap  | Volt       | Ampere |
| 2846 | Soest                   | 4000      | 1.058           | 1.34      | 1.0       | 3         | 3         | 0.37      | *        | *    | *          | *      |
| 2847 | Dortmund                | 4000      | 1.071           | 1.34      | 1.0       | 3         | 3         | 0.39      | *        | *    | *          | *      |
| 2848 | Kassel                  | 4000      | 1.071           | 1.34      | 1.0       | 3         | 3         | 0.41      | 2:07:53  | 0.0  | y          | y      |
| 2849 | Hannover                | 4000      | 1.148           | 1.34      | 1.0       | 3         | 3         | 0.37      | *        | *    | *          | *      |
| 2850 | Krefeld                 | 4000      | 1.101           | 1.34      | 1.0       | 3         | 3         | 0.38      | *        | *    | *          | *      |
| 2851 | Münster                 | 4000      | 1.065           | 1.34      | 1.0       | 4         | 4         | 0.37      | 0:18:58  | 0.0  | y          | y      |
| 2852 | Paderborn               | 4000      | 1.047           | 1.34      | 1.0       | 4         | 4         | 0.37      | 0:44:39  | 0.0  | y          | y      |
| 2853 | Detmold                 | 4000      | 1.051           | 1.34      | 1.0       | 4         | 4         | 0.32      | 0:31:19  | 0.0  | y          | y      |
| 2854 | Bielefeld               | 4000      | 1.049           | 1.34      | 1.0       | 4         | 4         | 0.29      | 0:19:47  | 0.0  | y          | y      |
| 2855 | Gütersloh               | 4000      | 1.063           | 1.34      | 1.0       | 4         | 4         | 0.34      | 0:30:28  | 0.0  | y          | y      |
| 2856 | Soest                   | 4000      | 1.058           | 1.34      | 1.0       | 4         | 4         | 0.31      | 0:16:15  | 0.0  | y          | y      |
| 2857 | Dortmund                | 4000      | 1.071           | 1.34      | 1.0       | 4         | 4         | 0.3       | 0:59:48  | 0.0  | y          | y      |
| 2858 | Kassel                  | 4000      | 1.071           | 1.34      | 1.0       | 4         | 4         | 0.29      | *        | *    | *          | *      |
| 2859 | Hannover                | 4000      | 1.148           | 1.34      | 1.0       | 4         | 4         | 0.27      | 4:35:05  | 0.0  | y          | y      |
| 2860 | Krefeld                 | 4000      | 1.101           | 1.34      | 1.0       | 4         | 4         | 0.36      | 1:45:36  | 0.0  | y          | y      |
| 2861 | Münster                 | 4000      | 1.065           | 1.34      | 1.0       | 4         | 4         | 0.39      | 2:33:07  | 0.0  | y          | y      |
| 2862 | Paderborn               | 4000      | 1.047           | 1.34      | 1.0       | 4         | 4         | 0.34      | 1:50:09  | 0.0  | y          | y      |
| 2863 | Detmold                 | 4000      | 1.051           | 1.34      | 1.0       | 4         | 4         | 0.33      | *        | *    | *          | *      |
| 2864 | Bielefeld               | 4000      | 1.049           | 1.34      | 1.0       | 4         | 4         | 0.36      | 1:29:03  | 0.0  | y          | y      |
| 2865 | Gütersloh               | 4000      | 1.063           | 1.34      | 1.0       | 4         | 4         | 0.37      | 5:06:28  | 0.27 | y          | y      |
| 2866 | Soest                   | 4000      | 1.058           | 1.34      | 1.0       | 4         | 4         | 0.32      | 6:47:20  | 0.0  | y          | y      |
| 2867 | Dortmund                | 4000      | 1.071           | 1.34      | 1.0       | 4         | 4         | 0.33      | 11:52:59 | 0.0  | y          | y      |
| 2868 | Kassel                  | 4000      | 1.071           | 1.34      | 1.0       | 4         | 4         | 0.38      | 1:35:04  | 0.0  | y          | y      |
| 2869 | Hannover                | 4000      | 1.147           | 1.34      | 1.0       | 4         | 4         | 0.29      | *        | *    | *          | *      |
| 2870 | Krefeld                 | 4000      | 1.102           | 1.34      | 1.0       | 4         | 4         | 0.31      | *        | *    | *          | *      |
| 2871 | Münster                 | 4000      | 1.065           | 1.34      | 1.0       | 4         | 4         | 0.4       | *        | *    | *          | *      |
| 2872 | Paderborn               | 4000      | 1.047           | 1.34      | 1.0       | 4         | 4         | 0.41      | *        | *    | *          | *      |
| 2873 | Detmold                 | 4000      | 1.052           | 1.34      | 1.0       | 4         | 4         | 0.41      | *        | *    | *          | *      |
| 2874 | Bielefeld               | 4000      | 1.050           | 1.34      | 1.0       | 4         | 4         | 0.38      | 1:38:47  | 0.0  | y          | y      |
| 2875 | Gütersloh               | 4000      | 1.063           | 1.34      | 1.0       | 4         | 4         | 0.4       | *        | *    | *          | *      |
| 2876 | Soest                   | 4000      | 1.058           | 1.34      | 1.0       | 4         | 4         | 0.38      | 0:33:35  | 0.0  | y          | y      |
| 2877 | Dortmund                | 4000      | 1.071           | 1.34      | 1.0       | 4         | 4         | 0.4       | *        | *    | *          | *      |
| 2878 | Kassel                  | 4000      | 1.071           | 1.34      | 1.0       | 4         | 4         | 0.38      | *        | *    | *          | *      |
| 2879 | Hannover                | 4000      | 1.148           | 1.34      | 1.0       | 4         | 4         | 0.39      | *        | *    | *          | *      |
| 2880 | Krefeld                 | 4000      | 1.102           | 1.34      | 1.0       | 4         | 4         | 0.39      | *        | *    | *          | *      |
| 2881 | Münster                 | 4000      | 1.065           | 1.0       | 1.0       | 2         | 2         | 0.26      | 0:12:27  | 0.0  | y          | y      |
| 2882 | Paderborn               | 4000      | 1.047           | 1.0       | 1.0       | 2         | 2         | 0.31      | 0:44:27  | 0.0  | y          | y      |
| 2883 | Detmold                 | 4000      | 1.052           | 1.0       | 1.0       | 2         | 2         | 0.24      | 0:18:56  | 0.0  | y          | y      |
| 2884 | Bielefeld               | 4000      | 1.050           | 1.0       | 1.0       | 2         | 2         | 0.23      | 0:11:40  | 0.0  | y          | y      |
| 2885 | Gütersloh               | 4000      | 1.063           | 1.0       | 1.0       | 2         | 2         | 0.23      | 0:45:50  | 0.0  | y          | y      |
| 2886 | Soest                   | 4000      | 1.058           | 1.0       | 1.0       | 2         | 2         | 0.27      | 0:07:13  | 0.0  | y          | y      |
| 2887 | Dortmund                | 4000      | 1.071           | 1.0       | 1.0       | 2         | 2         | 0.25      | 0:49:40  | 0.0  | y          | y      |
| 2888 | Kassel                  | 4000      | 1.071           | 1.0       | 1.0       | 2         | 2         | 0.24      | 0:48:19  | 0.0  | y          | y      |
| 2889 | Hannover                | 4000      | 1.148           | 1.0       | 1.0       | 2         | 2         | 0.26      | 0:53:49  | 0.0  | y          | y      |
| 2890 | Krefeld                 | 4000      | 1.102           | 1.0       | 1.0       | 2         | 2         | 0.21      | 0:38:56  | 0.0  | y          | y      |
| 2891 | Münster                 | 4000      | 1.065           | 1.0       | 1.0       | 2         | 2         | 0.33      | 0:48:25  | 0.0  | y          | y      |
| 2892 | Paderborn               | 4000      | 1.047           | 1.0       | 1.0       | 2         | 2         | 0.31      | 0:33:28  | 0.0  | y          | y      |
| 2893 | Detmold                 | 4000      | 1.052           | 1.0       | 1.0       | 2         | 2         | 0.31      | 0:27:28  | 0.1  | y          | y      |
| 2894 | Bielefeld               | 4000      | 1.050           | 1.0       | 1.0       | 2         | 2         | 0.29      | 0:36:26  | 0.0  | y          | y      |
| 2895 | Gütersloh               | 4000      | 1.063           | 1.0       | 1.0       | 2         | 2         | 0.3       | 5:18:41  | 0.0  | y          | y      |
| 2896 | Soest                   | 4000      | 1.058           | 1.0       | 1.0       | 2         | 2         | 0.28      | 1:08:02  | 0.0  | y          | y      |
| 2897 | Dortmund                | 4000      | 1.071           | 1.0       | 1.0       | 2         | 2         | 0.32      | 0:43:39  | 0.0  | y          | y      |

| #    | Network characteristics |           |                 |           |           |           |           |           | Solution |      | Simulation |        |
|------|-------------------------|-----------|-----------------|-----------|-----------|-----------|-----------|-----------|----------|------|------------|--------|
|      | <i>cn</i>               | <i>bu</i> | $\frac{nI}{bu}$ | <i>lf</i> | <i>tr</i> | <i>lt</i> | <i>tt</i> | <i>as</i> | Time     | Gap  | Volt       | Ampere |
| 2898 | Kassel                  | 4000      | 1.071           | 1.0       | 1.0       | 2         | 2         | 0.33      | 0:20:52  | 0.33 | y          | y      |
| 2899 | Hannover                | 4000      | 1.147           | 1.0       | 1.0       | 2         | 2         | 0.26      | 1:19:39  | 0.0  | y          | y      |
| 2900 | Krefeld                 | 4000      | 1.101           | 1.0       | 1.0       | 2         | 2         | 0.31      | *        | *    | *          | *      |
| 2901 | Münster                 | 4000      | 1.065           | 1.0       | 1.0       | 2         | 2         | 0.37      | 0:32:45  | 0.0  | y          | y      |
| 2902 | Paderborn               | 4000      | 1.047           | 1.0       | 1.0       | 2         | 2         | 0.38      | 1:09:57  | 0.0  | n          | y      |
| 2903 | Detmold                 | 4000      | 1.051           | 1.0       | 1.0       | 2         | 2         | 0.36      | 1:25:52  | 0.0  | y          | y      |
| 2904 | Bielefeld               | 4000      | 1.049           | 1.0       | 1.0       | 2         | 2         | 0.37      | 0:17:27  | 0.0  | y          | y      |
| 2905 | Gütersloh               | 4000      | 1.063           | 1.0       | 1.0       | 2         | 2         | 0.38      | 0:41:16  | 0.0  | y          | y      |
| 2906 | Soest                   | 4000      | 1.058           | 1.0       | 1.0       | 2         | 2         | 0.36      | 1:32:36  | 0.0  | y          | y      |
| 2907 | Dortmund                | 4000      | 1.071           | 1.0       | 1.0       | 2         | 2         | 0.37      | *        | *    | *          | *      |
| 2908 | Kassel                  | 4000      | 1.071           | 1.0       | 1.0       | 2         | 2         | 0.35      | 12:58:52 | 0.0  | y          | y      |
| 2909 | Hannover                | 4000      | 1.147           | 1.0       | 1.0       | 2         | 2         | 0.37      | 6:07:20  | 0.0  | y          | y      |
| 2910 | Krefeld                 | 4000      | 1.101           | 1.0       | 1.0       | 2         | 2         | 0.36      | 4:39:10  | 0.0  | y          | y      |
| 2911 | Münster                 | 4000      | 1.065           | 1.0       | 1.0       | 3         | 3         | 0.3       | 0:48:50  | 0.0  | y          | y      |
| 2912 | Paderborn               | 4000      | 1.047           | 1.0       | 1.0       | 3         | 3         | 0.34      | 0:52:06  | 0.0  | y          | y      |
| 2913 | Detmold                 | 4000      | 1.052           | 1.0       | 1.0       | 3         | 3         | 0.27      | 0:09:17  | 0.0  | y          | y      |
| 2914 | Bielefeld               | 4000      | 1.050           | 1.0       | 1.0       | 3         | 3         | 0.26      | 0:15:40  | 0.0  | y          | y      |
| 2915 | Gütersloh               | 4000      | 1.063           | 1.0       | 1.0       | 3         | 3         | 0.26      | 0:27:32  | 0.0  | y          | y      |
| 2916 | Soest                   | 4000      | 1.058           | 1.0       | 1.0       | 3         | 3         | 0.29      | 0:15:43  | 0.0  | y          | y      |
| 2917 | Dortmund                | 4000      | 1.071           | 1.0       | 1.0       | 3         | 3         | 0.28      | 1:05:11  | 0.0  | y          | y      |
| 2918 | Kassel                  | 4000      | 1.071           | 1.0       | 1.0       | 3         | 3         | 0.25      | 1:16:04  | 0.0  | y          | y      |
| 2919 | Hannover                | 4000      | 1.147           | 1.0       | 1.0       | 3         | 3         | 0.25      | 4:49:03  | 0.0  | y          | y      |
| 2920 | Krefeld                 | 4000      | 1.101           | 1.0       | 1.0       | 3         | 3         | 0.34      | 4:01:50  | 0.0  | y          | y      |
| 2921 | Münster                 | 4000      | 1.065           | 1.0       | 1.0       | 3         | 3         | 0.32      | 2:15:08  | 0.12 | y          | y      |
| 2922 | Paderborn               | 4000      | 1.047           | 1.0       | 1.0       | 3         | 3         | 0.32      | 5:25:58  | 0.0  | y          | y      |
| 2923 | Detmold                 | 4000      | 1.052           | 1.0       | 1.0       | 3         | 3         | 0.33      | 1:12:03  | 0.0  | y          | y      |
| 2924 | Bielefeld               | 4000      | 1.050           | 1.0       | 1.0       | 3         | 3         | 0.31      | 2:10:06  | 0.0  | y          | y      |
| 2925 | Gütersloh               | 4000      | 1.063           | 1.0       | 1.0       | 3         | 3         | 0.32      | 13:36:41 | 0.0  | y          | y      |
| 2926 | Soest                   | 4000      | 1.058           | 1.0       | 1.0       | 3         | 3         | 0.36      | 0:54:18  | 0.0  | y          | y      |
| 2927 | Dortmund                | 4000      | 1.071           | 1.0       | 1.0       | 3         | 3         | 0.31      | 1:58:33  | 0.0  | y          | y      |
| 2928 | Kassel                  | 4000      | 1.071           | 1.0       | 1.0       | 3         | 3         | 0.32      | *        | *    | *          | *      |
| 2929 | Hannover                | 4000      | 1.147           | 1.0       | 1.0       | 3         | 3         | 0.28      | 2:04:41  | 0.0  | y          | y      |
| 2930 | Krefeld                 | 4000      | 1.101           | 1.0       | 1.0       | 3         | 3         | 0.33      | 14:28:42 | 0.0  | y          | y      |
| 2931 | Münster                 | 4000      | 1.065           | 1.0       | 1.0       | 3         | 3         | 0.39      | 1:36:15  | 0.0  | y          | y      |
| 2932 | Paderborn               | 4000      | 1.047           | 1.0       | 1.0       | 3         | 3         | 0.39      | 10:34:23 | 0.0  | n          | y      |
| 2933 | Detmold                 | 4000      | 1.051           | 1.0       | 1.0       | 3         | 3         | 0.37      | 1:48:48  | 0.0  | y          | y      |
| 2934 | Bielefeld               | 4000      | 1.049           | 1.0       | 1.0       | 3         | 3         | 0.39      | 2:17:04  | 0.3  | y          | y      |
| 2935 | Gütersloh               | 4000      | 1.063           | 1.0       | 1.0       | 3         | 3         | 0.39      | 8:23:58  | 0.0  | y          | y      |
| 2936 | Soest                   | 4000      | 1.058           | 1.0       | 1.0       | 3         | 3         | 0.37      | *        | *    | *          | *      |
| 2937 | Dortmund                | 4000      | 1.071           | 1.0       | 1.0       | 3         | 3         | 0.4       | 2:13:22  | 0.0  | y          | y      |
| 2938 | Kassel                  | 4000      | 1.071           | 1.0       | 1.0       | 3         | 3         | 0.4       | 12:35:22 | 0.0  | y          | y      |
| 2939 | Hannover                | 4000      | 1.147           | 1.0       | 1.0       | 3         | 3         | 0.38      | *        | *    | *          | *      |
| 2940 | Krefeld                 | 4000      | 1.102           | 1.0       | 1.0       | 3         | 3         | 0.38      | *        | *    | *          | *      |
| 2941 | Münster                 | 4000      | 1.065           | 1.0       | 1.0       | 4         | 4         | 0.33      | 0:22:07  | 0.0  | y          | y      |
| 2942 | Paderborn               | 4000      | 1.047           | 1.0       | 1.0       | 4         | 4         | 0.37      | 0:29:27  | 0.0  | y          | y      |
| 2943 | Detmold                 | 4000      | 1.051           | 1.0       | 1.0       | 4         | 4         | 0.32      | 0:53:17  | 0.0  | y          | y      |
| 2944 | Bielefeld               | 4000      | 1.050           | 1.0       | 1.0       | 4         | 4         | 0.28      | 0:19:03  | 0.0  | y          | y      |
| 2945 | Gütersloh               | 4000      | 1.063           | 1.0       | 1.0       | 4         | 4         | 0.34      | 0:54:13  | 0.0  | y          | y      |
| 2946 | Soest                   | 4000      | 1.058           | 1.0       | 1.0       | 4         | 4         | 0.33      | 0:26:42  | 0.0  | y          | y      |
| 2947 | Dortmund                | 4000      | 1.071           | 1.0       | 1.0       | 4         | 4         | 0.31      | 0:34:40  | 0.0  | y          | y      |
| 2948 | Kassel                  | 4000      | 1.071           | 1.0       | 1.0       | 4         | 4         | 0.35      | 1:10:05  | 0.0  | y          | y      |
| 2949 | Hannover                | 4000      | 1.148           | 1.0       | 1.0       | 4         | 4         | 0.31      | 1:18:38  | 0.0  | y          | y      |

| #    | Network characteristics |           |                 |           |           |           |           |           | Solution |      | Simulation |        |
|------|-------------------------|-----------|-----------------|-----------|-----------|-----------|-----------|-----------|----------|------|------------|--------|
|      | <i>cn</i>               | <i>bu</i> | $\frac{nl}{bu}$ | <i>lf</i> | <i>tr</i> | <i>lt</i> | <i>tt</i> | <i>as</i> | Time     | Gap  | Volt       | Ampere |
| 2950 | Krefeld                 | 4000      | 1.102           | 1.0       | 1.0       | 4         | 4         | 0.25      | 0:58:36  | 0.0  | y          | y      |
| 2951 | Münster                 | 4000      | 1.065           | 1.0       | 1.0       | 4         | 4         | 0.37      | 5:34:27  | 0.0  | y          | y      |
| 2952 | Paderborn               | 4000      | 1.047           | 1.0       | 1.0       | 4         | 4         | 0.34      | 1:02:43  | 0.0  | y          | y      |
| 2953 | Detmold                 | 4000      | 1.051           | 1.0       | 1.0       | 4         | 4         | 0.33      | 11:37:50 | 0.0  | y          | y      |
| 2954 | Bielefeld               | 4000      | 1.050           | 1.0       | 1.0       | 4         | 4         | 0.33      | 2:55:47  | 0.0  | y          | y      |
| 2955 | Gütersloh               | 4000      | 1.063           | 1.0       | 1.0       | 4         | 4         | 0.34      | *        | *    | *          | *      |
| 2956 | Soest                   | 4000      | 1.058           | 1.0       | 1.0       | 4         | 4         | 0.38      | 1:02:43  | 0.0  | y          | y      |
| 2957 | Dortmund                | 4000      | 1.071           | 1.0       | 1.0       | 4         | 4         | 0.33      | *        | *    | *          | *      |
| 2958 | Kassel                  | 4000      | 1.071           | 1.0       | 1.0       | 4         | 4         | 0.31      | *        | *    | *          | *      |
| 2959 | Hannover                | 4000      | 1.148           | 1.0       | 1.0       | 4         | 4         | 0.33      | 4:26:18  | 0.0  | y          | y      |
| 2960 | Krefeld                 | 4000      | 1.102           | 1.0       | 1.0       | 4         | 4         | 0.31      | *        | *    | *          | *      |
| 2961 | Münster                 | 4000      | 1.065           | 1.0       | 1.0       | 4         | 4         | 0.4       | 3:37:32  | 0.0  | y          | y      |
| 2962 | Paderborn               | 4000      | 1.047           | 1.0       | 1.0       | 4         | 4         | 0.41      | *        | *    | *          | *      |
| 2963 | Detmold                 | 4000      | 1.052           | 1.0       | 1.0       | 4         | 4         | 0.41      | *        | *    | *          | *      |
| 2964 | Bielefeld               | 4000      | 1.050           | 1.0       | 1.0       | 4         | 4         | 0.38      | 0:19:55  | 0.0  | y          | y      |
| 2965 | Gütersloh               | 4000      | 1.063           | 1.0       | 1.0       | 4         | 4         | 0.4       | *        | *    | *          | *      |
| 2966 | Soest                   | 4000      | 1.058           | 1.0       | 1.0       | 4         | 4         | 0.39      | 5:41:01  | 0.08 | y          | y      |
| 2967 | Dortmund                | 4000      | 1.071           | 1.0       | 1.0       | 4         | 4         | 0.41      | *        | *    | *          | *      |
| 2968 | Kassel                  | 4000      | 1.071           | 1.0       | 1.0       | 4         | 4         | 0.41      | 7:12:30  | 0.03 | y          | y      |
| 2969 | Hannover                | 4000      | 1.147           | 1.0       | 1.0       | 4         | 4         | 0.4       | *        | *    | *          | *      |
| 2970 | Krefeld                 | 4000      | 1.101           | 1.0       | 1.0       | 4         | 4         | 0.4       | *        | *    | *          | *      |
| 2971 | Münster                 | 4000      | 1.067           | 0.83      | 1.25      | 2         | 2         | 0.23      | 0:08:03  | 0.0  | y          | y      |
| 2972 | Paderborn               | 4000      | 1.049           | 0.83      | 1.25      | 2         | 2         | 0.28      | 0:17:23  | 0.0  | y          | y      |
| 2973 | Detmold                 | 4000      | 1.054           | 0.83      | 1.25      | 2         | 2         | 0.21      | 0:39:03  | 0.0  | y          | y      |
| 2974 | Bielefeld               | 4000      | 1.051           | 0.83      | 1.25      | 2         | 2         | 0.21      | 0:34:24  | 0.0  | y          | y      |
| 2975 | Gütersloh               | 4000      | 1.065           | 0.83      | 1.25      | 2         | 2         | 0.2       | 0:13:18  | 0.0  | y          | y      |
| 2976 | Soest                   | 4000      | 1.060           | 0.83      | 1.25      | 2         | 2         | 0.22      | 0:19:44  | 0.0  | y          | y      |
| 2977 | Dortmund                | 4000      | 1.073           | 0.83      | 1.25      | 2         | 2         | 0.25      | 0:39:13  | 0.0  | y          | y      |
| 2978 | Kassel                  | 4000      | 1.073           | 0.83      | 1.25      | 2         | 2         | 0.23      | 0:25:24  | 0.0  | y          | y      |
| 2979 | Hannover                | 4000      | 1.149           | 0.83      | 1.25      | 2         | 2         | 0.22      | 0:57:00  | 0.0  | y          | y      |
| 2980 | Krefeld                 | 4000      | 1.103           | 0.83      | 1.25      | 2         | 2         | 0.27      | 0:39:04  | 0.43 | y          | y      |
| 2981 | Münster                 | 4000      | 1.067           | 0.83      | 1.25      | 2         | 2         | 0.33      | 0:21:18  | 0.0  | y          | y      |
| 2982 | Paderborn               | 4000      | 1.049           | 0.83      | 1.25      | 2         | 2         | 0.31      | 0:48:58  | 0.0  | y          | y      |
| 2983 | Detmold                 | 4000      | 1.053           | 0.83      | 1.25      | 2         | 2         | 0.3       | 0:48:25  | 0.0  | y          | y      |
| 2984 | Bielefeld               | 4000      | 1.051           | 0.83      | 1.25      | 2         | 2         | 0.3       | 0:34:08  | 0.0  | y          | y      |
| 2985 | Gütersloh               | 4000      | 1.065           | 0.83      | 1.25      | 2         | 2         | 0.29      | 1:23:11  | 0.0  | y          | y      |
| 2986 | Soest                   | 4000      | 1.060           | 0.83      | 1.25      | 2         | 2         | 0.3       | 0:21:28  | 0.0  | y          | y      |
| 2987 | Dortmund                | 4000      | 1.073           | 0.83      | 1.25      | 2         | 2         | 0.29      | 1:19:17  | 0.0  | y          | y      |
| 2988 | Kassel                  | 4000      | 1.073           | 0.83      | 1.25      | 2         | 2         | 0.29      | 0:19:11  | 0.0  | y          | y      |
| 2989 | Hannover                | 4000      | 1.149           | 0.83      | 1.25      | 2         | 2         | 0.3       | 1:18:38  | 0.0  | y          | y      |
| 2990 | Krefeld                 | 4000      | 1.103           | 0.83      | 1.25      | 2         | 2         | 0.27      | 2:18:39  | 0.0  | y          | y      |
| 2991 | Münster                 | 4000      | 1.067           | 0.83      | 1.25      | 2         | 2         | 0.36      | 0:35:56  | 0.0  | y          | y      |
| 2992 | Paderborn               | 4000      | 1.049           | 0.83      | 1.25      | 2         | 2         | 0.36      | 3:07:55  | 0.0  | y          | y      |
| 2993 | Detmold                 | 4000      | 1.053           | 0.83      | 1.25      | 2         | 2         | 0.36      | 0:40:33  | 0.0  | y          | y      |
| 2994 | Bielefeld               | 4000      | 1.051           | 0.83      | 1.25      | 2         | 2         | 0.36      | 2:11:32  | 0.0  | y          | y      |
| 2995 | Gütersloh               | 4000      | 1.066           | 0.83      | 1.25      | 2         | 2         | 0.38      | 9:08:53  | 0.0  | y          | y      |
| 2996 | Soest                   | 4000      | 1.060           | 0.83      | 1.25      | 2         | 2         | 0.37      | 0:43:08  | 0.08 | y          | y      |
| 2997 | Dortmund                | 4000      | 1.073           | 0.83      | 1.25      | 2         | 2         | 0.37      | 2:22:34  | 0.0  | y          | y      |
| 2998 | Kassel                  | 4000      | 1.073           | 0.83      | 1.25      | 2         | 2         | 0.36      | 1:46:13  | 0.0  | y          | y      |
| 2999 | Hannover                | 4000      | 1.149           | 0.83      | 1.25      | 2         | 2         | 0.36      | 2:35:22  | 0.0  | y          | y      |
| 3000 | Krefeld                 | 4000      | 1.103           | 0.83      | 1.25      | 2         | 2         | 0.36      | 2:25:37  | 0.0  | y          | y      |
| 3001 | Münster                 | 4000      | 1.067           | 0.83      | 1.25      | 3         | 3         | 0.31      | 0:26:19  | 0.0  | y          | y      |



| #    | <i>cn</i> | Network characteristics |                  |           |           |           |           |           | Solution |      | Simulation |        |
|------|-----------|-------------------------|------------------|-----------|-----------|-----------|-----------|-----------|----------|------|------------|--------|
|      |           | <i>bu</i>               | $\frac{n_l}{bu}$ | <i>lf</i> | <i>tr</i> | <i>lt</i> | <i>tt</i> | <i>as</i> | Time     | Gap  | Volt       | Ampere |
| 3054 | Bielefeld | 4000                    | 1.051            | 0.83      | 1.25      | 4         | 4         | 0.38      | 9:51:28  | 0.0  | y          | y      |
| 3055 | Gütersloh | 4000                    | 1.066            | 0.83      | 1.25      | 4         | 4         | 0.4       | *        | *    | *          | *      |
| 3056 | Soest     | 4000                    | 1.060            | 0.83      | 1.25      | 4         | 4         | 0.4       | 0:39:38  | 0.0  | y          | y      |
| 3057 | Dortmund  | 4000                    | 1.073            | 0.83      | 1.25      | 4         | 4         | 0.38      | *        | *    | *          | *      |
| 3058 | Kassel    | 4000                    | 1.073            | 0.83      | 1.25      | 4         | 4         | 0.38      | 7:20:17  | 0.0  | y          | y      |
| 3059 | Hannover  | 4000                    | 1.149            | 0.83      | 1.25      | 4         | 4         | 0.38      | 5:48:46  | 0.0  | y          | y      |
| 3060 | Krefeld   | 4000                    | 1.103            | 0.83      | 1.25      | 4         | 4         | 0.37      | *        | *    | *          | *      |
| 3061 | Münster   | 4000                    | 1.067            | 1.34      | 1.25      | 2         | 2         | 0.23      | 0:09:48  | 0.0  | y          | y      |
| 3062 | Paderborn | 4000                    | 1.049            | 1.34      | 1.25      | 2         | 2         | 0.28      | 0:26:00  | 0.0  | y          | y      |
| 3063 | Detmold   | 4000                    | 1.053            | 1.34      | 1.25      | 2         | 2         | 0.25      | 0:52:04  | 0.0  | y          | y      |
| 3064 | Bielefeld | 4000                    | 1.051            | 1.34      | 1.25      | 2         | 2         | 0.21      | 11:52:59 | 0.0  | y          | y      |
| 3065 | Gütersloh | 4000                    | 1.066            | 1.34      | 1.25      | 2         | 2         | 0.24      | 0:56:37  | 0.0  | y          | y      |
| 3066 | Soest     | 4000                    | 1.060            | 1.34      | 1.25      | 2         | 2         | 0.22      | 0:16:04  | 0.0  | y          | y      |
| 3067 | Dortmund  | 4000                    | 1.073            | 1.34      | 1.25      | 2         | 2         | 0.25      | 0:35:32  | 0.0  | y          | y      |
| 3068 | Kassel    | 4000                    | 1.073            | 1.34      | 1.25      | 2         | 2         | 0.23      | 0:15:58  | 0.0  | y          | y      |
| 3069 | Hannover  | 4000                    | 1.149            | 1.34      | 1.25      | 2         | 2         | 0.23      | 1:01:42  | 0.0  | y          | y      |
| 3070 | Krefeld   | 4000                    | 1.103            | 1.34      | 1.25      | 2         | 2         | 0.2       | 0:17:36  | 0.0  | y          | y      |
| 3071 | Münster   | 4000                    | 1.067            | 1.34      | 1.25      | 2         | 2         | 0.3       | 0:28:17  | 0.0  | y          | y      |
| 3072 | Paderborn | 4000                    | 1.049            | 1.34      | 1.25      | 2         | 2         | 0.31      | 0:23:17  | 0.0  | y          | y      |
| 3073 | Detmold   | 4000                    | 1.053            | 1.34      | 1.25      | 2         | 2         | 0.31      | 0:58:23  | 0.07 | y          | y      |
| 3074 | Bielefeld | 4000                    | 1.051            | 1.34      | 1.25      | 2         | 2         | 0.3       | 0:19:31  | 0.0  | y          | y      |
| 3075 | Gütersloh | 4000                    | 1.066            | 1.34      | 1.25      | 2         | 2         | 0.3       | 1:05:38  | 0.29 | y          | y      |
| 3076 | Soest     | 4000                    | 1.060            | 1.34      | 1.25      | 2         | 2         | 0.3       | 0:46:02  | 0.0  | y          | y      |
| 3077 | Dortmund  | 4000                    | 1.073            | 1.34      | 1.25      | 2         | 2         | 0.28      | 0:55:09  | 0.0  | y          | y      |
| 3078 | Kassel    | 4000                    | 1.073            | 1.34      | 1.25      | 2         | 2         | 0.31      | 1:18:08  | 0.0  | y          | y      |
| 3079 | Hannover  | 4000                    | 1.149            | 1.34      | 1.25      | 2         | 2         | 0.27      | 1:54:41  | 0.0  | y          | y      |
| 3080 | Krefeld   | 4000                    | 1.103            | 1.34      | 1.25      | 2         | 2         | 0.27      | 2:25:12  | 0.0  | y          | y      |
| 3081 | Münster   | 4000                    | 1.067            | 1.34      | 1.25      | 2         | 2         | 0.36      | 0:46:07  | 0.0  | y          | y      |
| 3082 | Paderborn | 4000                    | 1.049            | 1.34      | 1.25      | 2         | 2         | 0.36      | 0:51:49  | 0.0  | y          | y      |
| 3083 | Detmold   | 4000                    | 1.053            | 1.34      | 1.25      | 2         | 2         | 0.36      | 1:43:52  | 0.0  | y          | y      |
| 3084 | Bielefeld | 4000                    | 1.051            | 1.34      | 1.25      | 2         | 2         | 0.36      | 3:29:38  | 0.0  | y          | y      |
| 3085 | Gütersloh | 4000                    | 1.066            | 1.34      | 1.25      | 2         | 2         | 0.38      | *        | *    | *          | *      |
| 3086 | Soest     | 4000                    | 1.060            | 1.34      | 1.25      | 2         | 2         | 0.37      | 0:39:01  | 0.0  | y          | y      |
| 3087 | Dortmund  | 4000                    | 1.073            | 1.34      | 1.25      | 2         | 2         | 0.36      | 9:41:25  | 0.4  | y          | y      |
| 3088 | Kassel    | 4000                    | 1.073            | 1.34      | 1.25      | 2         | 2         | 0.36      | 1:37:09  | 0.0  | y          | y      |
| 3089 | Hannover  | 4000                    | 1.149            | 1.34      | 1.25      | 2         | 2         | 0.36      | 4:13:46  | 0.0  | y          | y      |
| 3090 | Krefeld   | 4000                    | 1.103            | 1.34      | 1.25      | 2         | 2         | 0.36      | 2:51:48  | 0.0  | y          | y      |
| 3091 | Münster   | 4000                    | 1.067            | 1.34      | 1.25      | 3         | 3         | 0.24      | 0:47:14  | 0.0  | y          | y      |
| 3092 | Paderborn | 4000                    | 1.049            | 1.34      | 1.25      | 3         | 3         | 0.3       | 0:13:31  | 0.0  | y          | y      |
| 3093 | Detmold   | 4000                    | 1.053            | 1.34      | 1.25      | 3         | 3         | 0.29      | 0:40:42  | 0.0  | y          | y      |
| 3094 | Bielefeld | 4000                    | 1.051            | 1.34      | 1.25      | 3         | 3         | 0.23      | 1:49:18  | 0.0  | y          | y      |
| 3095 | Gütersloh | 4000                    | 1.066            | 1.34      | 1.25      | 3         | 3         | 0.26      | 3:16:55  | 0.0  | y          | y      |
| 3096 | Soest     | 4000                    | 1.060            | 1.34      | 1.25      | 3         | 3         | 0.24      | 0:11:44  | 0.0  | y          | y      |
| 3097 | Dortmund  | 4000                    | 1.073            | 1.34      | 1.25      | 3         | 3         | 0.28      | 0:52:42  | 0.0  | y          | y      |
| 3098 | Kassel    | 4000                    | 1.073            | 1.34      | 1.25      | 3         | 3         | 0.24      | 0:21:38  | 0.0  | y          | y      |
| 3099 | Hannover  | 4000                    | 1.149            | 1.34      | 1.25      | 3         | 3         | 0.28      | 2:56:18  | 0.0  | y          | y      |
| 3100 | Krefeld   | 4000                    | 1.103            | 1.34      | 1.25      | 3         | 3         | 0.26      | 1:52:05  | 0.36 | y          | y      |
| 3101 | Münster   | 4000                    | 1.067            | 1.34      | 1.25      | 3         | 3         | 0.35      | 0:40:04  | 0.0  | y          | y      |
| 3102 | Paderborn | 4000                    | 1.049            | 1.34      | 1.25      | 3         | 3         | 0.32      | 0:36:48  | 0.0  | y          | y      |
| 3103 | Detmold   | 4000                    | 1.053            | 1.34      | 1.25      | 3         | 3         | 0.33      | 0:52:37  | 0.0  | y          | y      |
| 3104 | Bielefeld | 4000                    | 1.051            | 1.34      | 1.25      | 3         | 3         | 0.32      | 0:16:52  | 0.0  | y          | y      |
| 3105 | Gütersloh | 4000                    | 1.065            | 1.34      | 1.25      | 3         | 3         | 0.3       | *        | *    | *          | *      |

| #    | Network characteristics |           |                 |           |           |           |           | Solution  |          | Simulation |      |        |
|------|-------------------------|-----------|-----------------|-----------|-----------|-----------|-----------|-----------|----------|------------|------|--------|
|      | <i>cn</i>               | <i>bu</i> | $\frac{nl}{bu}$ | <i>lf</i> | <i>tr</i> | <i>lt</i> | <i>tt</i> | <i>as</i> | Time     | Gap        | Volt | Ampere |
| 3106 | Soest                   | 4000      | 1.060           | 1.34      | 1.25      | 3         | 3         | 0.32      | 0:30:01  | 0.0        | y    | y      |
| 3107 | Dortmund                | 4000      | 1.073           | 1.34      | 1.25      | 3         | 3         | 0.3       | 1:20:54  | 0.0        | y    | y      |
| 3108 | Kassel                  | 4000      | 1.073           | 1.34      | 1.25      | 3         | 3         | 0.31      | 0:28:34  | 0.0        | y    | y      |
| 3109 | Hannover                | 4000      | 1.149           | 1.34      | 1.25      | 3         | 3         | 0.29      | 12:58:34 | 0.2        | y    | y      |
| 3110 | Krefeld                 | 4000      | 1.103           | 1.34      | 1.25      | 3         | 3         | 0.32      | 1:36:32  | 0.01       | y    | y      |
| 3111 | Münster                 | 4000      | 1.067           | 1.34      | 1.25      | 3         | 3         | 0.37      | 0:46:44  | 0.0        | y    | y      |
| 3112 | Paderborn               | 4000      | 1.049           | 1.34      | 1.25      | 3         | 3         | 0.37      | 2:58:35  | 0.2        | y    | y      |
| 3113 | Detmold                 | 4000      | 1.053           | 1.34      | 1.25      | 3         | 3         | 0.36      | 3:56:38  | 0.0        | y    | y      |
| 3114 | Bielefeld               | 4000      | 1.051           | 1.34      | 1.25      | 3         | 3         | 0.37      | *        | *          | *    | *      |
| 3115 | Gütersloh               | 4000      | 1.065           | 1.34      | 1.25      | 3         | 3         | 0.35      | *        | *          | *    | *      |
| 3116 | Soest                   | 4000      | 1.060           | 1.34      | 1.25      | 3         | 3         | 0.39      | 1:09:46  | 0.0        | y    | y      |
| 3117 | Dortmund                | 4000      | 1.073           | 1.34      | 1.25      | 3         | 3         | 0.37      | *        | *          | *    | *      |
| 3118 | Kassel                  | 4000      | 1.073           | 1.34      | 1.25      | 3         | 3         | 0.37      | 3:07:54  | 0.0        | y    | y      |
| 3119 | Hannover                | 4000      | 1.149           | 1.34      | 1.25      | 3         | 3         | 0.36      | *        | *          | *    | *      |
| 3120 | Krefeld                 | 4000      | 1.103           | 1.34      | 1.25      | 3         | 3         | 0.38      | 14:15:37 | 0.0        | y    | y      |
| 3121 | Münster                 | 4000      | 1.067           | 1.34      | 1.25      | 4         | 4         | 0.26      | 0:30:49  | 0.0        | y    | y      |
| 3122 | Paderborn               | 4000      | 1.049           | 1.34      | 1.25      | 4         | 4         | 0.33      | 0:16:15  | 0.0        | y    | y      |
| 3123 | Detmold                 | 4000      | 1.053           | 1.34      | 1.25      | 4         | 4         | 0.3       | 0:46:36  | 0.0        | y    | y      |
| 3124 | Bielefeld               | 4000      | 1.051           | 1.34      | 1.25      | 4         | 4         | 0.25      | 1:46:54  | 0.0        | y    | y      |
| 3125 | Gütersloh               | 4000      | 1.066           | 1.34      | 1.25      | 4         | 4         | 0.28      | 1:38:53  | 0.0        | y    | y      |
| 3126 | Soest                   | 4000      | 1.060           | 1.34      | 1.25      | 4         | 4         | 0.27      | 1:43:07  | 0.0        | y    | y      |
| 3127 | Dortmund                | 4000      | 1.073           | 1.34      | 1.25      | 4         | 4         | 0.31      | 0:26:55  | 0.0        | y    | y      |
| 3128 | Kassel                  | 4000      | 1.073           | 1.34      | 1.25      | 4         | 4         | 0.26      | 1:10:58  | 0.0        | y    | y      |
| 3129 | Hannover                | 4000      | 1.149           | 1.34      | 1.25      | 4         | 4         | 0.3       | 7:21:26  | 0.0        | y    | y      |
| 3130 | Krefeld                 | 4000      | 1.103           | 1.34      | 1.25      | 4         | 4         | 0.24      | 2:07:16  | 0.0        | y    | y      |
| 3131 | Münster                 | 4000      | 1.067           | 1.34      | 1.25      | 4         | 4         | 0.34      | 0:48:55  | 0.0        | y    | y      |
| 3132 | Paderborn               | 4000      | 1.049           | 1.34      | 1.25      | 4         | 4         | 0.34      | 3:53:07  | 0.0        | y    | y      |
| 3133 | Detmold                 | 4000      | 1.053           | 1.34      | 1.25      | 4         | 4         | 0.34      | 2:14:24  | 0.32       | y    | y      |
| 3134 | Bielefeld               | 4000      | 1.051           | 1.34      | 1.25      | 4         | 4         | 0.33      | 0:34:11  | 0.0        | y    | y      |
| 3135 | Gütersloh               | 4000      | 1.066           | 1.34      | 1.25      | 4         | 4         | 0.33      | 2:53:05  | 0.0        | y    | y      |
| 3136 | Soest                   | 4000      | 1.060           | 1.34      | 1.25      | 4         | 4         | 0.33      | 0:42:45  | 0.0        | y    | y      |
| 3137 | Dortmund                | 4000      | 1.073           | 1.34      | 1.25      | 4         | 4         | 0.31      | 0:54:30  | 0.0        | y    | y      |
| 3138 | Kassel                  | 4000      | 1.073           | 1.34      | 1.25      | 4         | 4         | 0.32      | 2:47:11  | 0.0        | y    | y      |
| 3139 | Hannover                | 4000      | 1.149           | 1.34      | 1.25      | 4         | 4         | 0.32      | 1:03:51  | 0.0        | y    | y      |
| 3140 | Krefeld                 | 4000      | 1.103           | 1.34      | 1.25      | 4         | 4         | 0.3       | 3:06:49  | 0.0        | y    | y      |
| 3141 | Münster                 | 4000      | 1.067           | 1.34      | 1.25      | 4         | 4         | 0.38      | 23:24:28 | 0.0        | y    | y      |
| 3142 | Paderborn               | 4000      | 1.049           | 1.34      | 1.25      | 4         | 4         | 0.39      | 7:02:18  | 0.46       | y    | y      |
| 3143 | Detmold                 | 4000      | 1.053           | 1.34      | 1.25      | 4         | 4         | 0.39      | *        | *          | *    | *      |
| 3144 | Bielefeld               | 4000      | 1.051           | 1.34      | 1.25      | 4         | 4         | 0.38      | *        | *          | *    | *      |
| 3145 | Gütersloh               | 4000      | 1.066           | 1.34      | 1.25      | 4         | 4         | 0.4       | *        | *          | *    | *      |
| 3146 | Soest                   | 4000      | 1.060           | 1.34      | 1.25      | 4         | 4         | 0.4       | 0:40:12  | 0.0        | y    | y      |
| 3147 | Dortmund                | 4000      | 1.073           | 1.34      | 1.25      | 4         | 4         | 0.4       | 2:36:16  | 0.0        | y    | y      |
| 3148 | Kassel                  | 4000      | 1.073           | 1.34      | 1.25      | 4         | 4         | 0.38      | *        | *          | *    | *      |
| 3149 | Hannover                | 4000      | 1.149           | 1.34      | 1.25      | 4         | 4         | 0.39      | *        | *          | *    | *      |
| 3150 | Krefeld                 | 4000      | 1.103           | 1.34      | 1.25      | 4         | 4         | 0.37      | *        | *          | *    | *      |
| 3151 | Münster                 | 4000      | 1.067           | 1.0       | 1.25      | 2         | 2         | 0.23      | 0:20:08  | 0.0        | y    | y      |
| 3152 | Paderborn               | 4000      | 1.049           | 1.0       | 1.25      | 2         | 2         | 0.28      | 0:14:53  | 0.0        | y    | y      |
| 3153 | Detmold                 | 4000      | 1.053           | 1.0       | 1.25      | 2         | 2         | 0.25      | 0:31:45  | 0.0        | y    | y      |
| 3154 | Bielefeld               | 4000      | 1.051           | 1.0       | 1.25      | 2         | 2         | 0.21      | 0:17:32  | 0.0        | y    | y      |
| 3155 | Gütersloh               | 4000      | 1.065           | 1.0       | 1.25      | 2         | 2         | 0.2       | 1:02:35  | 0.0        | y    | y      |
| 3156 | Soest                   | 4000      | 1.060           | 1.0       | 1.25      | 2         | 2         | 0.22      | 0:10:18  | 0.0        | y    | y      |
| 3157 | Dortmund                | 4000      | 1.073           | 1.0       | 1.25      | 2         | 2         | 0.21      | 0:18:13  | 0.0        | y    | y      |

| #    | Network characteristics |           |                  |           |           |           |           |           | Solution |      | Simulation |        |
|------|-------------------------|-----------|------------------|-----------|-----------|-----------|-----------|-----------|----------|------|------------|--------|
|      | <i>cn</i>               | <i>bu</i> | $\frac{n_l}{bu}$ | <i>lf</i> | <i>tr</i> | <i>lt</i> | <i>tt</i> | <i>as</i> | Time     | Gap  | Volt       | Ampere |
| 3158 | Kassel                  | 4000      | 1.073            | 1.0       | 1.25      | 2         | 2         | 0.23      | 0:45:39  | 0.0  | y          | y      |
| 3159 | Hannover                | 4000      | 1.149            | 1.0       | 1.25      | 2         | 2         | 0.23      | 1:14:34  | 0.0  | y          | y      |
| 3160 | Krefeld                 | 4000      | 1.103            | 1.0       | 1.25      | 2         | 2         | 0.2       | 0:48:13  | 0.0  | y          | y      |
| 3161 | Münster                 | 4000      | 1.067            | 1.0       | 1.25      | 2         | 2         | 0.3       | 0:25:45  | 0.0  | y          | y      |
| 3162 | Paderborn               | 4000      | 1.049            | 1.0       | 1.25      | 2         | 2         | 0.31      | 0:50:22  | 0.0  | y          | y      |
| 3163 | Detmold                 | 4000      | 1.053            | 1.0       | 1.25      | 2         | 2         | 0.31      | 0:37:47  | 0.0  | y          | y      |
| 3164 | Bielefeld               | 4000      | 1.051            | 1.0       | 1.25      | 2         | 2         | 0.3       | 0:15:28  | 0.0  | y          | y      |
| 3165 | Gütersloh               | 4000      | 1.065            | 1.0       | 1.25      | 2         | 2         | 0.29      | 2:08:46  | 0.0  | y          | y      |
| 3166 | Soest                   | 4000      | 1.060            | 1.0       | 1.25      | 2         | 2         | 0.3       | 0:22:33  | 0.0  | y          | y      |
| 3167 | Dortmund                | 4000      | 1.073            | 1.0       | 1.25      | 2         | 2         | 0.29      | 0:31:40  | 0.0  | y          | y      |
| 3168 | Kassel                  | 4000      | 1.073            | 1.0       | 1.25      | 2         | 2         | 0.29      | 0:30:58  | 0.0  | y          | y      |
| 3169 | Hannover                | 4000      | 1.149            | 1.0       | 1.25      | 2         | 2         | 0.29      | 2:57:28  | 0.0  | y          | y      |
| 3170 | Krefeld                 | 4000      | 1.103            | 1.0       | 1.25      | 2         | 2         | 0.3       | 1:02:32  | 0.11 | y          | y      |
| 3171 | Münster                 | 4000      | 1.067            | 1.0       | 1.25      | 2         | 2         | 0.36      | 0:35:04  | 0.0  | y          | y      |
| 3172 | Paderborn               | 4000      | 1.049            | 1.0       | 1.25      | 2         | 2         | 0.36      | 2:20:38  | 0.0  | y          | y      |
| 3173 | Detmold                 | 4000      | 1.054            | 1.0       | 1.25      | 2         | 2         | 0.36      | 1:55:53  | 0.0  | y          | y      |
| 3174 | Bielefeld               | 4000      | 1.051            | 1.0       | 1.25      | 2         | 2         | 0.36      | 1:52:57  | 0.0  | y          | y      |
| 3175 | Gütersloh               | 4000      | 1.066            | 1.0       | 1.25      | 2         | 2         | 0.38      | *        | *    | *          | *      |
| 3176 | Soest                   | 4000      | 1.060            | 1.0       | 1.25      | 2         | 2         | 0.37      | 0:43:40  | 0.0  | y          | y      |
| 3177 | Dortmund                | 4000      | 1.073            | 1.0       | 1.25      | 2         | 2         | 0.37      | 2:25:57  | 0.0  | y          | y      |
| 3178 | Kassel                  | 4000      | 1.073            | 1.0       | 1.25      | 2         | 2         | 0.36      | 1:58:06  | 0.0  | y          | y      |
| 3179 | Hannover                | 4000      | 1.149            | 1.0       | 1.25      | 2         | 2         | 0.37      | 1:53:49  | 0.0  | y          | y      |
| 3180 | Krefeld                 | 4000      | 1.103            | 1.0       | 1.25      | 2         | 2         | 0.36      | 1:30:47  | 0.0  | y          | y      |
| 3181 | Münster                 | 4000      | 1.067            | 1.0       | 1.25      | 3         | 3         | 0.25      | 0:24:40  | 0.0  | y          | y      |
| 3182 | Paderborn               | 4000      | 1.049            | 1.0       | 1.25      | 3         | 3         | 0.3       | 0:15:11  | 0.0  | y          | y      |
| 3183 | Detmold                 | 4000      | 1.053            | 1.0       | 1.25      | 3         | 3         | 0.28      | 0:38:02  | 0.0  | y          | y      |
| 3184 | Bielefeld               | 4000      | 1.051            | 1.0       | 1.25      | 3         | 3         | 0.23      | 1:28:10  | 0.0  | y          | y      |
| 3185 | Gütersloh               | 4000      | 1.066            | 1.0       | 1.25      | 3         | 3         | 0.26      | 0:24:34  | 0.0  | y          | y      |
| 3186 | Soest                   | 4000      | 1.060            | 1.0       | 1.25      | 3         | 3         | 0.25      | 0:42:37  | 0.0  | y          | y      |
| 3187 | Dortmund                | 4000      | 1.073            | 1.0       | 1.25      | 3         | 3         | 0.28      | 0:15:50  | 0.0  | y          | y      |
| 3188 | Kassel                  | 4000      | 1.073            | 1.0       | 1.25      | 3         | 3         | 0.24      | 0:30:58  | 0.0  | y          | y      |
| 3189 | Hannover                | 4000      | 1.149            | 1.0       | 1.25      | 3         | 3         | 0.28      | *        | *    | *          | *      |
| 3190 | Krefeld                 | 4000      | 1.103            | 1.0       | 1.25      | 3         | 3         | 0.3       | 0:58:32  | 0.0  | y          | y      |
| 3191 | Münster                 | 4000      | 1.067            | 1.0       | 1.25      | 3         | 3         | 0.32      | 0:42:09  | 0.0  | y          | y      |
| 3192 | Paderborn               | 4000      | 1.049            | 1.0       | 1.25      | 3         | 3         | 0.32      | 0:25:46  | 0.0  | y          | y      |
| 3193 | Detmold                 | 4000      | 1.053            | 1.0       | 1.25      | 3         | 3         | 0.33      | 0:48:45  | 0.0  | y          | y      |
| 3194 | Bielefeld               | 4000      | 1.051            | 1.0       | 1.25      | 3         | 3         | 0.32      | 0:19:47  | 0.0  | y          | y      |
| 3195 | Gütersloh               | 4000      | 1.065            | 1.0       | 1.25      | 3         | 3         | 0.3       | 22:30:11 | 0.0  | y          | y      |
| 3196 | Soest                   | 4000      | 1.060            | 1.0       | 1.25      | 3         | 3         | 0.32      | 0:24:12  | 0.0  | y          | y      |
| 3197 | Dortmund                | 4000      | 1.073            | 1.0       | 1.25      | 3         | 3         | 0.3       | 1:30:54  | 0.0  | y          | y      |
| 3198 | Kassel                  | 4000      | 1.073            | 1.0       | 1.25      | 3         | 3         | 0.31      | 1:46:40  | 0.0  | y          | y      |
| 3199 | Hannover                | 4000      | 1.149            | 1.0       | 1.25      | 3         | 3         | 0.29      | 2:16:24  | 0.0  | y          | y      |
| 3200 | Krefeld                 | 4000      | 1.103            | 1.0       | 1.25      | 3         | 3         | 0.29      | 15:37:00 | 0.0  | y          | y      |
| 3201 | Münster                 | 4000      | 1.067            | 1.0       | 1.25      | 3         | 3         | 0.37      | 1:46:50  | 0.0  | y          | y      |
| 3202 | Paderborn               | 4000      | 1.049            | 1.0       | 1.25      | 3         | 3         | 0.37      | 1:53:51  | 0.0  | y          | y      |
| 3203 | Detmold                 | 4000      | 1.053            | 1.0       | 1.25      | 3         | 3         | 0.37      | 5:30:16  | 0.18 | y          | y      |
| 3204 | Bielefeld               | 4000      | 1.051            | 1.0       | 1.25      | 3         | 3         | 0.37      | 24:28:33 | 0.0  | y          | y      |
| 3205 | Gütersloh               | 4000      | 1.066            | 1.0       | 1.25      | 3         | 3         | 0.39      | *        | *    | *          | *      |
| 3206 | Soest                   | 4000      | 1.060            | 1.0       | 1.25      | 3         | 3         | 0.39      | 1:37:20  | 0.0  | y          | y      |
| 3207 | Dortmund                | 4000      | 1.073            | 1.0       | 1.25      | 3         | 3         | 0.37      | *        | *    | *          | *      |
| 3208 | Kassel                  | 4000      | 1.073            | 1.0       | 1.25      | 3         | 3         | 0.37      | *        | *    | *          | *      |
| 3209 | Hannover                | 4000      | 1.149            | 1.0       | 1.25      | 3         | 3         | 0.38      | 5:01:28  | 0.18 | y          | y      |

| #    | Network characteristics |           |                 |           |           |           |           | Solution  |          | Simulation |      |        |
|------|-------------------------|-----------|-----------------|-----------|-----------|-----------|-----------|-----------|----------|------------|------|--------|
|      | <i>cn</i>               | <i>bu</i> | $\frac{nl}{bu}$ | <i>lf</i> | <i>tr</i> | <i>lt</i> | <i>tt</i> | <i>as</i> | Time     | Gap        | Volt | Ampere |
| 3210 | Krefeld                 | 4000      | 1.103           | 1.0       | 1.25      | 3         | 3         | 0.38      | 24:50:38 | 0.0        | y    | y      |
| 3211 | Münster                 | 4000      | 1.067           | 1.0       | 1.25      | 4         | 4         | 0.27      | 0:29:07  | 0.0        | y    | y      |
| 3212 | Paderborn               | 4000      | 1.049           | 1.0       | 1.25      | 4         | 4         | 0.33      | 0:38:33  | 0.0        | y    | y      |
| 3213 | Detmold                 | 4000      | 1.053           | 1.0       | 1.25      | 4         | 4         | 0.3       | 3:09:41  | 0.0        | y    | y      |
| 3214 | Bielefeld               | 4000      | 1.051           | 1.0       | 1.25      | 4         | 4         | 0.25      | 1:53:45  | 0.0        | y    | y      |
| 3215 | Gütersloh               | 4000      | 1.065           | 1.0       | 1.25      | 4         | 4         | 0.24      | 0:21:29  | 0.0        | y    | y      |
| 3216 | Soest                   | 4000      | 1.060           | 1.0       | 1.25      | 4         | 4         | 0.27      | 0:22:48  | 0.0        | y    | y      |
| 3217 | Dortmund                | 4000      | 1.073           | 1.0       | 1.25      | 4         | 4         | 0.31      | 0:24:07  | 0.0        | y    | y      |
| 3218 | Kassel                  | 4000      | 1.073           | 1.0       | 1.25      | 4         | 4         | 0.29      | 1:25:01  | 0.0        | y    | y      |
| 3219 | Hannover                | 4000      | 1.149           | 1.0       | 1.25      | 4         | 4         | 0.27      | 1:26:09  | 0.0        | y    | y      |
| 3220 | Krefeld                 | 4000      | 1.103           | 1.0       | 1.25      | 4         | 4         | 0.33      | 0:55:56  | 0.0        | y    | y      |
| 3221 | Münster                 | 4000      | 1.067           | 1.0       | 1.25      | 4         | 4         | 0.34      | 2:50:11  | 0.0        | y    | y      |
| 3222 | Paderborn               | 4000      | 1.049           | 1.0       | 1.25      | 4         | 4         | 0.34      | 0:50:13  | 0.0        | y    | y      |
| 3223 | Detmold                 | 4000      | 1.054           | 1.0       | 1.25      | 4         | 4         | 0.34      | 1:04:25  | 0.0        | y    | y      |
| 3224 | Bielefeld               | 4000      | 1.051           | 1.0       | 1.25      | 4         | 4         | 0.33      | 0:36:37  | 0.0        | y    | y      |
| 3225 | Gütersloh               | 4000      | 1.066           | 1.0       | 1.25      | 4         | 4         | 0.33      | 2:19:21  | 0.0        | y    | y      |
| 3226 | Soest                   | 4000      | 1.060           | 1.0       | 1.25      | 4         | 4         | 0.33      | 0:25:44  | 0.0        | y    | y      |
| 3227 | Dortmund                | 4000      | 1.073           | 1.0       | 1.25      | 4         | 4         | 0.32      | 1:48:56  | 0.1        | y    | y      |
| 3228 | Kassel                  | 4000      | 1.073           | 1.0       | 1.25      | 4         | 4         | 0.31      | 2:56:10  | 0.0        | y    | y      |
| 3229 | Hannover                | 4000      | 1.149           | 1.0       | 1.25      | 4         | 4         | 0.31      | 2:20:47  | 0.0        | y    | y      |
| 3230 | Krefeld                 | 4000      | 1.103           | 1.0       | 1.25      | 4         | 4         | 0.33      | 1:35:56  | 0.1        | y    | y      |
| 3231 | Münster                 | 4000      | 1.067           | 1.0       | 1.25      | 4         | 4         | 0.39      | 12:00:30 | 0.0        | y    | y      |
| 3232 | Paderborn               | 4000      | 1.049           | 1.0       | 1.25      | 4         | 4         | 0.39      | 10:07:54 | 0.0        | y    | y      |
| 3233 | Detmold                 | 4000      | 1.053           | 1.0       | 1.25      | 4         | 4         | 0.39      | *        | *          | *    | *      |
| 3234 | Bielefeld               | 4000      | 1.051           | 1.0       | 1.25      | 4         | 4         | 0.38      | *        | *          | *    | *      |
| 3235 | Gütersloh               | 4000      | 1.066           | 1.0       | 1.25      | 4         | 4         | 0.4       | *        | *          | *    | *      |
| 3236 | Soest                   | 4000      | 1.060           | 1.0       | 1.25      | 4         | 4         | 0.4       | 0:53:23  | 0.0        | y    | y      |
| 3237 | Dortmund                | 4000      | 1.073           | 1.0       | 1.25      | 4         | 4         | 0.4       | 3:26:23  | 0.44       | y    | y      |
| 3238 | Kassel                  | 4000      | 1.073           | 1.0       | 1.25      | 4         | 4         | 0.39      | *        | *          | *    | *      |
| 3239 | Hannover                | 4000      | 1.149           | 1.0       | 1.25      | 4         | 4         | 0.39      | *        | *          | *    | *      |
| 3240 | Krefeld                 | 4000      | 1.103           | 1.0       | 1.25      | 4         | 4         | 0.39      | 3:06:53  | 0.0        | y    | y      |
| 3241 | Münster                 | 5000      | 1.062           | 0.83      | 0.76      | 2         | 2         | 0.24      | 1:24:24  | 0.0        | y    | y      |
| 3242 | Paderborn               | 5000      | 1.048           | 0.83      | 0.76      | 2         | 2         | 0.26      | 0:33:49  | 0.0        | y    | y      |
| 3243 | Detmold                 | 5000      | 1.049           | 0.83      | 0.76      | 2         | 2         | 0.24      | 0:53:14  | 0.0        | y    | y      |
| 3244 | Bielefeld               | 5000      | 1.051           | 0.83      | 0.76      | 2         | 2         | 0.3       | 0:10:47  | 0.0        | y    | y      |
| 3245 | Gütersloh               | 5000      | 1.062           | 0.83      | 0.76      | 2         | 2         | 0.24      | 24:33:50 | 0.0        | y    | y      |
| 3246 | Soest                   | 5000      | 1.054           | 0.83      | 0.76      | 2         | 2         | 0.31      | 0:17:53  | 0.0        | y    | y      |
| 3247 | Dortmund                | 5000      | 1.074           | 0.83      | 0.76      | 2         | 2         | 0.23      | 0:48:12  | 0.0        | y    | y      |
| 3248 | Kassel                  | 5000      | 1.073           | 0.83      | 0.76      | 2         | 2         | 0.25      | 1:45:44  | 0.0        | y    | y      |
| 3249 | Hannover                | 5000      | 1.150           | 0.83      | 0.76      | 2         | 2         | 0.23      | 1:08:37  | 0.0        | y    | y      |
| 3250 | Krefeld                 | 5000      | 1.100           | 0.83      | 0.76      | 2         | 2         | 0.26      | 2:45:27  | 0.0        | y    | y      |
| 3251 | Münster                 | 5000      | 1.062           | 0.83      | 0.76      | 2         | 2         | 0.29      | 1:17:55  | 0.0        | y    | y      |
| 3252 | Paderborn               | 5000      | 1.048           | 0.83      | 0.76      | 2         | 2         | 0.31      | 0:37:46  | 0.16       | y    | y      |
| 3253 | Detmold                 | 5000      | 1.049           | 0.83      | 0.76      | 2         | 2         | 0.29      | 0:26:57  | 0.0        | y    | y      |
| 3254 | Bielefeld               | 5000      | 1.051           | 0.83      | 0.76      | 2         | 2         | 0.34      | 0:24:57  | 0.0        | y    | y      |
| 3255 | Gütersloh               | 5000      | 1.062           | 0.83      | 0.76      | 2         | 2         | 0.3       | *        | *          | *    | *      |
| 3256 | Soest                   | 5000      | 1.054           | 0.83      | 0.76      | 2         | 2         | 0.31      | 0:37:51  | 0.0        | y    | y      |
| 3257 | Dortmund                | 5000      | 1.074           | 0.83      | 0.76      | 2         | 2         | 0.3       | 2:08:35  | 0.0        | y    | y      |
| 3258 | Kassel                  | 5000      | 1.072           | 0.83      | 0.76      | 2         | 2         | 0.29      | 2:08:47  | 0.09       | y    | y      |
| 3259 | Hannover                | 5000      | 1.150           | 0.83      | 0.76      | 2         | 2         | 0.31      | 2:18:21  | 0.0        | y    | y      |
| 3260 | Krefeld                 | 5000      | 1.100           | 0.83      | 0.76      | 2         | 2         | 0.33      | *        | *          | *    | *      |
| 3261 | Münster                 | 5000      | 1.062           | 0.83      | 0.76      | 2         | 2         | 0.37      | 1:43:31  | 0.0        | y    | y      |

| #    | Network characteristics |           |                  |           |           |           |           | Solution  |          | Simulation |      |        |
|------|-------------------------|-----------|------------------|-----------|-----------|-----------|-----------|-----------|----------|------------|------|--------|
|      | <i>cn</i>               | <i>bu</i> | $\frac{n_l}{bu}$ | <i>lf</i> | <i>tr</i> | <i>lt</i> | <i>tt</i> | <i>as</i> | Time     | Gap        | Volt | Ampere |
| 3262 | Paderborn               | 5000      | 1.048            | 0.83      | 0.76      | 2         | 2         | 0.39      | 4:53:22  | 0.0        | y    | y      |
| 3263 | Detmold                 | 5000      | 1.049            | 0.83      | 0.76      | 2         | 2         | 0.35      | *        | *          | *    | *      |
| 3264 | Bielefeld               | 5000      | 1.051            | 0.83      | 0.76      | 2         | 2         | 0.4       | *        | *          | *    | *      |
| 3265 | Gütersloh               | 5000      | 1.062            | 0.83      | 0.76      | 2         | 2         | 0.38      | *        | *          | *    | *      |
| 3266 | Soest                   | 5000      | 1.054            | 0.83      | 0.76      | 2         | 2         | 0.38      | 4:56:32  | 0.07       | y    | y      |
| 3267 | Dortmund                | 5000      | 1.074            | 0.83      | 0.76      | 2         | 2         | 0.36      | *        | *          | *    | *      |
| 3268 | Kassel                  | 5000      | 1.073            | 0.83      | 0.76      | 2         | 2         | 0.37      | 18:51:41 | 0.0        | y    | y      |
| 3269 | Hannover                | 5000      | 1.150            | 0.83      | 0.76      | 2         | 2         | 0.38      | *        | *          | *    | *      |
| 3270 | Krefeld                 | 5000      | 1.100            | 0.83      | 0.76      | 2         | 2         | 0.36      | 6:36:41  | 0.0        | y    | y      |
| 3271 | Münster                 | 5000      | 1.062            | 0.83      | 0.76      | 3         | 3         | 0.27      | 3:40:41  | 0.0        | y    | y      |
| 3272 | Paderborn               | 5000      | 1.048            | 0.83      | 0.76      | 3         | 3         | 0.29      | 1:35:09  | 0.0        | y    | y      |
| 3273 | Detmold                 | 5000      | 1.050            | 0.83      | 0.76      | 3         | 3         | 0.24      | *        | *          | *    | *      |
| 3274 | Bielefeld               | 5000      | 1.050            | 0.83      | 0.76      | 3         | 3         | 0.27      | 0:56:39  | 0.0        | y    | y      |
| 3275 | Gütersloh               | 5000      | 1.062            | 0.83      | 0.76      | 3         | 3         | 0.27      | 16:04:05 | 0.0        | y    | y      |
| 3276 | Soest                   | 5000      | 1.054            | 0.83      | 0.76      | 3         | 3         | 0.28      | 0:24:34  | 0.0        | y    | y      |
| 3277 | Dortmund                | 5000      | 1.074            | 0.83      | 0.76      | 3         | 3         | 0.27      | 1:01:20  | 0.0        | y    | y      |
| 3278 | Kassel                  | 5000      | 1.073            | 0.83      | 0.76      | 3         | 3         | 0.25      | 3:22:54  | 0.0        | y    | y      |
| 3279 | Hannover                | 5000      | 1.150            | 0.83      | 0.76      | 3         | 3         | 0.25      | *        | *          | *    | *      |
| 3280 | Krefeld                 | 5000      | 1.100            | 0.83      | 0.76      | 3         | 3         | 0.24      | 10:17:16 | 0.38       | y    | y      |
| 3281 | Münster                 | 5000      | 1.062            | 0.83      | 0.76      | 3         | 3         | 0.33      | 1:56:57  | 0.0        | y    | y      |
| 3282 | Paderborn               | 5000      | 1.048            | 0.83      | 0.76      | 3         | 3         | 0.33      | *        | *          | *    | *      |
| 3283 | Detmold                 | 5000      | 1.049            | 0.83      | 0.76      | 3         | 3         | 0.3       | *        | *          | *    | *      |
| 3284 | Bielefeld               | 5000      | 1.051            | 0.83      | 0.76      | 3         | 3         | 0.36      | 2:53:29  | 0.28       | y    | y      |
| 3285 | Gütersloh               | 5000      | 1.062            | 0.83      | 0.76      | 3         | 3         | 0.29      | *        | *          | *    | *      |
| 3286 | Soest                   | 5000      | 1.054            | 0.83      | 0.76      | 3         | 3         | 0.34      | 2:46:28  | 0.0        | y    | y      |
| 3287 | Dortmund                | 5000      | 1.074            | 0.83      | 0.76      | 3         | 3         | 0.31      | *        | *          | *    | *      |
| 3288 | Kassel                  | 5000      | 1.073            | 0.83      | 0.76      | 3         | 3         | 0.3       | *        | *          | *    | *      |
| 3289 | Hannover                | 5000      | 1.150            | 0.83      | 0.76      | 3         | 3         | 0.33      | 4:11:31  | 0.0        | y    | y      |
| 3290 | Krefeld                 | 5000      | 1.100            | 0.83      | 0.76      | 3         | 3         | 0.31      | *        | *          | *    | *      |
| 3291 | Münster                 | 5000      | 1.062            | 0.83      | 0.76      | 3         | 3         | 0.37      | *        | *          | *    | *      |
| 3292 | Paderborn               | 5000      | 1.049            | 0.83      | 0.76      | 3         | 3         | 0.38      | *        | *          | *    | *      |
| 3293 | Detmold                 | 5000      | 1.050            | 0.83      | 0.76      | 3         | 3         | 0.37      | *        | *          | *    | *      |
| 3294 | Bielefeld               | 5000      | 1.051            | 0.83      | 0.76      | 3         | 3         | 0.41      | *        | *          | *    | *      |
| 3295 | Gütersloh               | 5000      | 1.062            | 0.83      | 0.76      | 3         | 3         | 0.38      | *        | *          | *    | *      |
| 3296 | Soest                   | 5000      | 1.055            | 0.83      | 0.76      | 3         | 3         | 0.4       | *        | *          | *    | *      |
| 3297 | Dortmund                | 5000      | 1.074            | 0.83      | 0.76      | 3         | 3         | 0.38      | *        | *          | *    | *      |
| 3298 | Kassel                  | 5000      | 1.073            | 0.83      | 0.76      | 3         | 3         | 0.37      | *        | *          | *    | *      |
| 3299 | Hannover                | 5000      | 1.150            | 0.83      | 0.76      | 3         | 3         | 0.4       | *        | *          | *    | *      |
| 3300 | Krefeld                 | 5000      | 1.100            | 0.83      | 0.76      | 3         | 3         | 0.4       | *        | *          | *    | *      |
| 3301 | Münster                 | 5000      | 1.062            | 0.83      | 0.76      | 4         | 4         | 0.31      | 0:32:25  | 0.0        | y    | y      |
| 3302 | Paderborn               | 5000      | 1.048            | 0.83      | 0.76      | 4         | 4         | 0.32      | 5:45:41  | 0.0        | y    | y      |
| 3303 | Detmold                 | 5000      | 1.050            | 0.83      | 0.76      | 4         | 4         | 0.3       | 6:18:53  | 0.42       | y    | y      |
| 3304 | Bielefeld               | 5000      | 1.051            | 0.83      | 0.76      | 4         | 4         | 0.36      | 0:16:36  | 0.0        | y    | y      |
| 3305 | Gütersloh               | 5000      | 1.062            | 0.83      | 0.76      | 4         | 4         | 0.28      | 11:49:43 | 0.0        | y    | y      |
| 3306 | Soest                   | 5000      | 1.054            | 0.83      | 0.76      | 4         | 4         | 0.3       | 0:45:05  | 0.0        | y    | y      |
| 3307 | Dortmund                | 5000      | 1.074            | 0.83      | 0.76      | 4         | 4         | 0.27      | 3:12:42  | 0.0        | y    | y      |
| 3308 | Kassel                  | 5000      | 1.073            | 0.83      | 0.76      | 4         | 4         | 0.3       | 4:38:43  | 0.0        | y    | y      |
| 3309 | Hannover                | 5000      | 1.150            | 0.83      | 0.76      | 4         | 4         | 0.34      | *        | *          | *    | *      |
| 3310 | Krefeld                 | 5000      | 1.100            | 0.83      | 0.76      | 4         | 4         | 0.37      | 1:36:20  | 0.0        | y    | y      |
| 3311 | Münster                 | 5000      | 1.062            | 0.83      | 0.76      | 4         | 4         | 0.33      | 12:57:19 | 0.0        | y    | y      |
| 3312 | Paderborn               | 5000      | 1.048            | 0.83      | 0.76      | 4         | 4         | 0.35      | *        | *          | *    | *      |
| 3313 | Detmold                 | 5000      | 1.050            | 0.83      | 0.76      | 4         | 4         | 0.32      | *        | *          | *    | *      |

| #    | Network characteristics |           |                 |           |           |           |           | Solution  |          | Simulation |      |        |
|------|-------------------------|-----------|-----------------|-----------|-----------|-----------|-----------|-----------|----------|------------|------|--------|
|      | <i>cn</i>               | <i>bu</i> | $\frac{nl}{bu}$ | <i>lf</i> | <i>tr</i> | <i>lt</i> | <i>tt</i> | <i>as</i> | Time     | Gap        | Volt | Ampere |
| 3314 | Bielefeld               | 5000      | 1.051           | 0.83      | 0.76      | 4         | 4         | 0.38      | 7:07:09  | 0.0        | y    | y      |
| 3315 | Gütersloh               | 5000      | 1.062           | 0.83      | 0.76      | 4         | 4         | 0.31      | *        | *          | *    | *      |
| 3316 | Soest                   | 5000      | 1.054           | 0.83      | 0.76      | 4         | 4         | 0.36      | 8:16:24  | 0.0        | y    | y      |
| 3317 | Dortmund                | 5000      | 1.074           | 0.83      | 0.76      | 4         | 4         | 0.33      | *        | *          | *    | *      |
| 3318 | Kassel                  | 5000      | 1.073           | 0.83      | 0.76      | 4         | 4         | 0.32      | *        | *          | *    | *      |
| 3319 | Hannover                | 5000      | 1.150           | 0.83      | 0.76      | 4         | 4         | 0.35      | *        | *          | *    | *      |
| 3320 | Krefeld                 | 5000      | 1.100           | 0.83      | 0.76      | 4         | 4         | 0.33      | *        | *          | *    | *      |
| 3321 | Münster                 | 5000      | 1.062           | 0.83      | 0.76      | 4         | 4         | 0.38      | *        | *          | *    | *      |
| 3322 | Paderborn               | 5000      | 1.049           | 0.83      | 0.76      | 4         | 4         | 0.39      | *        | *          | *    | *      |
| 3323 | Detmold                 | 5000      | 1.049           | 0.83      | 0.76      | 4         | 4         | 0.38      | *        | *          | *    | *      |
| 3324 | Bielefeld               | 5000      | 1.050           | 0.83      | 0.76      | 4         | 4         | 0.41      | *        | *          | *    | *      |
| 3325 | Gütersloh               | 5000      | 1.062           | 0.83      | 0.76      | 4         | 4         | 0.41      | *        | *          | *    | *      |
| 3326 | Soest                   | 5000      | 1.054           | 0.83      | 0.76      | 4         | 4         | 0.41      | *        | *          | *    | *      |
| 3327 | Dortmund                | 5000      | 1.074           | 0.83      | 0.76      | 4         | 4         | 0.39      | *        | *          | *    | *      |
| 3328 | Kassel                  | 5000      | 1.073           | 0.83      | 0.76      | 4         | 4         | 0.4       | *        | *          | *    | *      |
| 3329 | Hannover                | 5000      | 1.150           | 0.83      | 0.76      | 4         | 4         | 0.41      | *        | *          | *    | *      |
| 3330 | Krefeld                 | 5000      | 1.100           | 0.83      | 0.76      | 4         | 4         | 0.41      | *        | *          | *    | *      |
| 3331 | Münster                 | 5000      | 1.062           | 1.34      | 0.76      | 2         | 2         | 0.24      | 5:31:06  | 0.0        | y    | y      |
| 3332 | Paderborn               | 5000      | 1.048           | 1.34      | 0.76      | 2         | 2         | 0.26      | 1:06:46  | 0.0        | y    | y      |
| 3333 | Detmold                 | 5000      | 1.050           | 1.34      | 0.76      | 2         | 2         | 0.22      | *        | *          | *    | *      |
| 3334 | Bielefeld               | 5000      | 1.050           | 1.34      | 0.76      | 2         | 2         | 0.24      | 1:22:07  | 0.0        | y    | y      |
| 3335 | Gütersloh               | 5000      | 1.062           | 1.34      | 0.76      | 2         | 2         | 0.24      | 4:19:21  | 0.0        | y    | y      |
| 3336 | Soest                   | 5000      | 1.054           | 1.34      | 0.76      | 2         | 2         | 0.31      | 0:17:52  | 0.0        | y    | y      |
| 3337 | Dortmund                | 5000      | 1.074           | 1.34      | 0.76      | 2         | 2         | 0.28      | 0:22:01  | 0.0        | y    | y      |
| 3338 | Kassel                  | 5000      | 1.073           | 1.34      | 0.76      | 2         | 2         | 0.21      | 1:31:45  | 0.0        | y    | y      |
| 3339 | Hannover                | 5000      | 1.150           | 1.34      | 0.76      | 2         | 2         | 0.23      | *        | *          | *    | *      |
| 3340 | Krefeld                 | 5000      | 1.100           | 1.34      | 0.76      | 2         | 2         | 0.25      | 2:46:20  | 0.0        | y    | y      |
| 3341 | Münster                 | 5000      | 1.062           | 1.34      | 0.76      | 2         | 2         | 0.29      | 2:19:49  | 0.0        | y    | y      |
| 3342 | Paderborn               | 5000      | 1.048           | 1.34      | 0.76      | 2         | 2         | 0.31      | 2:05:50  | 0.0        | y    | y      |
| 3343 | Detmold                 | 5000      | 1.049           | 1.34      | 0.76      | 2         | 2         | 0.29      | 2:11:58  | 0.1        | y    | y      |
| 3344 | Bielefeld               | 5000      | 1.050           | 1.34      | 0.76      | 2         | 2         | 0.33      | *        | *          | *    | *      |
| 3345 | Gütersloh               | 5000      | 1.062           | 1.34      | 0.76      | 2         | 2         | 0.27      | *        | *          | *    | *      |
| 3346 | Soest                   | 5000      | 1.054           | 1.34      | 0.76      | 2         | 2         | 0.31      | 2:52:06  | 0.0        | y    | y      |
| 3347 | Dortmund                | 5000      | 1.074           | 1.34      | 0.76      | 2         | 2         | 0.29      | 5:28:04  | 0.0        | y    | y      |
| 3348 | Kassel                  | 5000      | 1.073           | 1.34      | 0.76      | 2         | 2         | 0.29      | 2:12:25  | 0.0        | y    | y      |
| 3349 | Hannover                | 5000      | 1.150           | 1.34      | 0.76      | 2         | 2         | 0.31      | *        | *          | *    | *      |
| 3350 | Krefeld                 | 5000      | 1.100           | 1.34      | 0.76      | 2         | 2         | 0.33      | *        | *          | *    | *      |
| 3351 | Münster                 | 5000      | 1.062           | 1.34      | 0.76      | 2         | 2         | 0.37      | 13:05:51 | 0.07       | y    | y      |
| 3352 | Paderborn               | 5000      | 1.048           | 1.34      | 0.76      | 2         | 2         | 0.39      | 2:46:33  | 0.0        | n    | y      |
| 3353 | Detmold                 | 5000      | 1.049           | 1.34      | 0.76      | 2         | 2         | 0.35      | *        | *          | *    | *      |
| 3354 | Bielefeld               | 5000      | 1.051           | 1.34      | 0.76      | 2         | 2         | 0.4       | *        | *          | *    | *      |
| 3355 | Gütersloh               | 5000      | 1.062           | 1.34      | 0.76      | 2         | 2         | 0.38      | *        | *          | *    | *      |
| 3356 | Soest                   | 5000      | 1.054           | 1.34      | 0.76      | 2         | 2         | 0.35      | 15:09:43 | 0.0        | y    | y      |
| 3357 | Dortmund                | 5000      | 1.074           | 1.34      | 0.76      | 2         | 2         | 0.36      | *        | *          | *    | *      |
| 3358 | Kassel                  | 5000      | 1.073           | 1.34      | 0.76      | 2         | 2         | 0.37      | 4:15:49  | 0.0        | y    | y      |
| 3359 | Hannover                | 5000      | 1.150           | 1.34      | 0.76      | 2         | 2         | 0.37      | *        | *          | *    | *      |
| 3360 | Krefeld                 | 5000      | 1.100           | 1.34      | 0.76      | 2         | 2         | 0.36      | *        | *          | *    | *      |
| 3361 | Münster                 | 5000      | 1.062           | 1.34      | 0.76      | 3         | 3         | 0.29      | 1:43:42  | 0.0        | y    | y      |
| 3362 | Paderborn               | 5000      | 1.048           | 1.34      | 0.76      | 3         | 3         | 0.29      | 1:25:07  | 0.0        | y    | y      |
| 3363 | Detmold                 | 5000      | 1.050           | 1.34      | 0.76      | 3         | 3         | 0.29      | 3:28:30  | 0.0        | y    | y      |
| 3364 | Bielefeld               | 5000      | 1.050           | 1.34      | 0.76      | 3         | 3         | 0.27      | *        | *          | *    | *      |
| 3365 | Gütersloh               | 5000      | 1.062           | 1.34      | 0.76      | 3         | 3         | 0.27      | 6:48:39  | 0.0        | y    | y      |

| #    | Network characteristics |           |                  |           |           |           |           | Solution  |          | Simulation |      |        |
|------|-------------------------|-----------|------------------|-----------|-----------|-----------|-----------|-----------|----------|------------|------|--------|
|      | <i>cn</i>               | <i>bu</i> | $\frac{n_l}{bu}$ | <i>lf</i> | <i>tr</i> | <i>lt</i> | <i>tt</i> | <i>as</i> | Time     | Gap        | Volt | Ampere |
| 3366 | Soest                   | 5000      | 1.054            | 1.34      | 0.76      | 3         | 3         | 0.3       | 1:32:05  | 0.0        | y    | y      |
| 3367 | Dortmund                | 5000      | 1.074            | 1.34      | 0.76      | 3         | 3         | 0.27      | 1:17:05  | 0.0        | y    | y      |
| 3368 | Kassel                  | 5000      | 1.073            | 1.34      | 0.76      | 3         | 3         | 0.28      | *        | *          | *    | *      |
| 3369 | Hannover                | 5000      | 1.150            | 1.34      | 0.76      | 3         | 3         | 0.25      | *        | *          | *    | *      |
| 3370 | Krefeld                 | 5000      | 1.100            | 1.34      | 0.76      | 3         | 3         | 0.28      | *        | *          | *    | *      |
| 3371 | Münster                 | 5000      | 1.062            | 1.34      | 0.76      | 3         | 3         | 0.31      | 10:19:36 | 0.0        | y    | y      |
| 3372 | Paderborn               | 5000      | 1.048            | 1.34      | 0.76      | 3         | 3         | 0.32      | 5:02:18  | 0.0        | n    | y      |
| 3373 | Detmold                 | 5000      | 1.050            | 1.34      | 0.76      | 3         | 3         | 0.29      | *        | *          | *    | *      |
| 3374 | Bielefeld               | 5000      | 1.051            | 1.34      | 0.76      | 3         | 3         | 0.36      | *        | *          | *    | *      |
| 3375 | Gütersloh               | 5000      | 1.062            | 1.34      | 0.76      | 3         | 3         | 0.31      | *        | *          | *    | *      |
| 3376 | Soest                   | 5000      | 1.054            | 1.34      | 0.76      | 3         | 3         | 0.33      | *        | *          | *    | *      |
| 3377 | Dortmund                | 5000      | 1.074            | 1.34      | 0.76      | 3         | 3         | 0.31      | *        | *          | *    | *      |
| 3378 | Kassel                  | 5000      | 1.073            | 1.34      | 0.76      | 3         | 3         | 0.28      | *        | *          | *    | *      |
| 3379 | Hannover                | 5000      | 1.150            | 1.34      | 0.76      | 3         | 3         | 0.33      | *        | *          | *    | *      |
| 3380 | Krefeld                 | 5000      | 1.100            | 1.34      | 0.76      | 3         | 3         | 0.31      | *        | *          | *    | *      |
| 3381 | Münster                 | 5000      | 1.062            | 1.34      | 0.76      | 3         | 3         | 0.39      | *        | *          | *    | *      |
| 3382 | Paderborn               | 5000      | 1.048            | 1.34      | 0.76      | 3         | 3         | 0.41      | 10:54:55 | 0.0        | n    | y      |
| 3383 | Detmold                 | 5000      | 1.049            | 1.34      | 0.76      | 3         | 3         | 0.37      | *        | *          | *    | *      |
| 3384 | Bielefeld               | 5000      | 1.051            | 1.34      | 0.76      | 3         | 3         | 0.41      | *        | *          | *    | *      |
| 3385 | Gütersloh               | 5000      | 1.062            | 1.34      | 0.76      | 3         | 3         | 0.4       | *        | *          | *    | *      |
| 3386 | Soest                   | 5000      | 1.054            | 1.34      | 0.76      | 3         | 3         | 0.37      | *        | *          | *    | *      |
| 3387 | Dortmund                | 5000      | 1.074            | 1.34      | 0.76      | 3         | 3         | 0.38      | *        | *          | *    | *      |
| 3388 | Kassel                  | 5000      | 1.073            | 1.34      | 0.76      | 3         | 3         | 0.36      | *        | *          | *    | *      |
| 3389 | Hannover                | 5000      | 1.150            | 1.34      | 0.76      | 3         | 3         | 0.4       | *        | *          | *    | *      |
| 3390 | Krefeld                 | 5000      | 1.100            | 1.34      | 0.76      | 3         | 3         | 0.4       | *        | *          | *    | *      |
| 3391 | Münster                 | 5000      | 1.062            | 1.34      | 0.76      | 4         | 4         | 0.3       | *        | *          | *    | *      |
| 3392 | Paderborn               | 5000      | 1.049            | 1.34      | 0.76      | 4         | 4         | 0.26      | 2:24:37  | 0.0        | y    | y      |
| 3393 | Detmold                 | 5000      | 1.049            | 1.34      | 0.76      | 4         | 4         | 0.29      | 2:41:02  | 0.0        | y    | y      |
| 3394 | Bielefeld               | 5000      | 1.051            | 1.34      | 0.76      | 4         | 4         | 0.36      | 1:30:09  | 0.0        | y    | y      |
| 3395 | Gütersloh               | 5000      | 1.062            | 1.34      | 0.76      | 4         | 4         | 0.3       | *        | *          | *    | *      |
| 3396 | Soest                   | 5000      | 1.054            | 1.34      | 0.76      | 4         | 4         | 0.32      | 9:31:04  | 0.0        | y    | y      |
| 3397 | Dortmund                | 5000      | 1.074            | 1.34      | 0.76      | 4         | 4         | 0.27      | 2:11:55  | 0.0        | y    | y      |
| 3398 | Kassel                  | 5000      | 1.073            | 1.34      | 0.76      | 4         | 4         | 0.27      | *        | *          | *    | *      |
| 3399 | Hannover                | 5000      | 1.150            | 1.34      | 0.76      | 4         | 4         | 0.27      | *        | *          | *    | *      |
| 3400 | Krefeld                 | 5000      | 1.100            | 1.34      | 0.76      | 4         | 4         | 0.26      | *        | *          | *    | *      |
| 3401 | Münster                 | 5000      | 1.062            | 1.34      | 0.76      | 4         | 4         | 0.33      | *        | *          | *    | *      |
| 3402 | Paderborn               | 5000      | 1.048            | 1.34      | 0.76      | 4         | 4         | 0.34      | *        | *          | *    | *      |
| 3403 | Detmold                 | 5000      | 1.049            | 1.34      | 0.76      | 4         | 4         | 0.32      | *        | *          | *    | *      |
| 3404 | Bielefeld               | 5000      | 1.051            | 1.34      | 0.76      | 4         | 4         | 0.38      | *        | *          | *    | *      |
| 3405 | Gütersloh               | 5000      | 1.062            | 1.34      | 0.76      | 4         | 4         | 0.33      | *        | *          | *    | *      |
| 3406 | Soest                   | 5000      | 1.055            | 1.34      | 0.76      | 4         | 4         | 0.32      | *        | *          | *    | *      |
| 3407 | Dortmund                | 5000      | 1.074            | 1.34      | 0.76      | 4         | 4         | 0.33      | *        | *          | *    | *      |
| 3408 | Kassel                  | 5000      | 1.073            | 1.34      | 0.76      | 4         | 4         | 0.32      | *        | *          | *    | *      |
| 3409 | Hannover                | 5000      | 1.150            | 1.34      | 0.76      | 4         | 4         | 0.35      | *        | *          | *    | *      |
| 3410 | Krefeld                 | 5000      | 1.100            | 1.34      | 0.76      | 4         | 4         | 0.38      | *        | *          | *    | *      |
| 3411 | Münster                 | 5000      | 1.062            | 1.34      | 0.76      | 4         | 4         | 0.41      | *        | *          | *    | *      |
| 3412 | Paderborn               | 5000      | 1.048            | 1.34      | 0.76      | 4         | 4         | 0.36      | *        | *          | *    | *      |
| 3413 | Detmold                 | 5000      | 1.049            | 1.34      | 0.76      | 4         | 4         | 0.38      | *        | *          | *    | *      |
| 3414 | Bielefeld               | 5000      | 1.050            | 1.34      | 0.76      | 4         | 4         | 0.41      | *        | *          | *    | *      |
| 3415 | Gütersloh               | 5000      | 1.062            | 1.34      | 0.76      | 4         | 4         | 0.4       | *        | *          | *    | *      |
| 3416 | Soest                   | 5000      | 1.054            | 1.34      | 0.76      | 4         | 4         | 0.38      | *        | *          | *    | *      |
| 3417 | Dortmund                | 5000      | 1.074            | 1.34      | 0.76      | 4         | 4         | 0.39      | *        | *          | *    | *      |

| #    | Network characteristics |           |                  |           |           |           |           | Solution  |          | Simulation |      |        |
|------|-------------------------|-----------|------------------|-----------|-----------|-----------|-----------|-----------|----------|------------|------|--------|
|      | <i>cn</i>               | <i>bu</i> | $\frac{n_l}{bu}$ | <i>lf</i> | <i>tr</i> | <i>lt</i> | <i>tt</i> | <i>as</i> | Time     | Gap        | Volt | Ampere |
| 3418 | Kassel                  | 5000      | 1.073            | 1.34      | 0.76      | 4         | 4         | 0.37      | *        | *          | *    | *      |
| 3419 | Hannover                | 5000      | 1.150            | 1.34      | 0.76      | 4         | 4         | 0.41      | *        | *          | *    | *      |
| 3420 | Krefeld                 | 5000      | 1.100            | 1.34      | 0.76      | 4         | 4         | 0.41      | *        | *          | *    | *      |
| 3421 | Münster                 | 5000      | 1.062            | 1.0       | 0.76      | 2         | 2         | 0.26      | 0:24:33  | 0.0        | y    | y      |
| 3422 | Paderborn               | 5000      | 1.048            | 1.0       | 0.76      | 2         | 2         | 0.26      | 0:43:19  | 0.0        | y    | y      |
| 3423 | Detmold                 | 5000      | 1.049            | 1.0       | 0.76      | 2         | 2         | 0.24      | 1:04:00  | 0.0        | y    | y      |
| 3424 | Bielefeld               | 5000      | 1.050            | 1.0       | 0.76      | 2         | 2         | 0.24      | 1:01:03  | 0.0        | y    | y      |
| 3425 | Gütersloh               | 5000      | 1.062            | 1.0       | 0.76      | 2         | 2         | 0.24      | 1:07:19  | 0.0        | y    | y      |
| 3426 | Soest                   | 5000      | 1.054            | 1.0       | 0.76      | 2         | 2         | 0.25      | 44:11:45 | 0.0        | y    | y      |
| 3427 | Dortmund                | 5000      | 1.074            | 1.0       | 0.76      | 2         | 2         | 0.24      | 0:54:08  | 0.0        | y    | y      |
| 3428 | Kassel                  | 5000      | 1.073            | 1.0       | 0.76      | 2         | 2         | 0.22      | 1:56:03  | 0.0        | y    | y      |
| 3429 | Hannover                | 5000      | 1.150            | 1.0       | 0.76      | 2         | 2         | 0.23      | *        | *          | *    | *      |
| 3430 | Krefeld                 | 5000      | 1.100            | 1.0       | 0.76      | 2         | 2         | 0.31      | 1:16:50  | 0.0        | y    | y      |
| 3431 | Münster                 | 5000      | 1.062            | 1.0       | 0.76      | 2         | 2         | 0.31      | 2:42:47  | 0.0        | y    | y      |
| 3432 | Paderborn               | 5000      | 1.048            | 1.0       | 0.76      | 2         | 2         | 0.31      | 1:04:37  | 0.0        | y    | y      |
| 3433 | Detmold                 | 5000      | 1.049            | 1.0       | 0.76      | 2         | 2         | 0.29      | 1:57:31  | 0.0        | y    | y      |
| 3434 | Bielefeld               | 5000      | 1.050            | 1.0       | 0.76      | 2         | 2         | 0.33      | *        | *          | *    | *      |
| 3435 | Gütersloh               | 5000      | 1.062            | 1.0       | 0.76      | 2         | 2         | 0.3       | 4:52:02  | 0.0        | y    | y      |
| 3436 | Soest                   | 5000      | 1.054            | 1.0       | 0.76      | 2         | 2         | 0.31      | 1:20:23  | 0.0        | y    | y      |
| 3437 | Dortmund                | 5000      | 1.074            | 1.0       | 0.76      | 2         | 2         | 0.29      | *        | *          | *    | *      |
| 3438 | Kassel                  | 5000      | 1.073            | 1.0       | 0.76      | 2         | 2         | 0.29      | 2:19:28  | 0.0        | y    | y      |
| 3439 | Hannover                | 5000      | 1.150            | 1.0       | 0.76      | 2         | 2         | 0.31      | 2:25:09  | 0.0        | y    | y      |
| 3440 | Krefeld                 | 5000      | 1.100            | 1.0       | 0.76      | 2         | 2         | 0.33      | *        | *          | *    | *      |
| 3441 | Münster                 | 5000      | 1.062            | 1.0       | 0.76      | 2         | 2         | 0.36      | *        | *          | *    | *      |
| 3442 | Paderborn               | 5000      | 1.048            | 1.0       | 0.76      | 2         | 2         | 0.39      | *        | *          | *    | *      |
| 3443 | Detmold                 | 5000      | 1.050            | 1.0       | 0.76      | 2         | 2         | 0.39      | *        | *          | *    | *      |
| 3444 | Bielefeld               | 5000      | 1.050            | 1.0       | 0.76      | 2         | 2         | 0.38      | *        | *          | *    | *      |
| 3445 | Gütersloh               | 5000      | 1.062            | 1.0       | 0.76      | 2         | 2         | 0.37      | *        | *          | *    | *      |
| 3446 | Soest                   | 5000      | 1.054            | 1.0       | 0.76      | 2         | 2         | 0.38      | *        | *          | *    | *      |
| 3447 | Dortmund                | 5000      | 1.074            | 1.0       | 0.76      | 2         | 2         | 0.36      | *        | *          | *    | *      |
| 3448 | Kassel                  | 5000      | 1.073            | 1.0       | 0.76      | 2         | 2         | 0.34      | *        | *          | *    | *      |
| 3449 | Hannover                | 5000      | 1.150            | 1.0       | 0.76      | 2         | 2         | 0.37      | 5:43:37  | 0.28       | y    | y      |
| 3450 | Krefeld                 | 5000      | 1.100            | 1.0       | 0.76      | 2         | 2         | 0.38      | *        | *          | *    | *      |
| 3451 | Münster                 | 5000      | 1.062            | 1.0       | 0.76      | 3         | 3         | 0.27      | 3:25:34  | 0.0        | y    | y      |
| 3452 | Paderborn               | 5000      | 1.048            | 1.0       | 0.76      | 3         | 3         | 0.29      | 1:15:57  | 0.0        | y    | y      |
| 3453 | Detmold                 | 5000      | 1.050            | 1.0       | 0.76      | 3         | 3         | 0.24      | *        | *          | *    | *      |
| 3454 | Bielefeld               | 5000      | 1.051            | 1.0       | 0.76      | 3         | 3         | 0.33      | 0:42:55  | 0.0        | y    | y      |
| 3455 | Gütersloh               | 5000      | 1.062            | 1.0       | 0.76      | 3         | 3         | 0.24      | *        | *          | *    | *      |
| 3456 | Soest                   | 5000      | 1.054            | 1.0       | 0.76      | 3         | 3         | 0.28      | 0:26:50  | 0.0        | y    | y      |
| 3457 | Dortmund                | 5000      | 1.074            | 1.0       | 0.76      | 3         | 3         | 0.25      | 0:48:23  | 0.0        | y    | y      |
| 3458 | Kassel                  | 5000      | 1.073            | 1.0       | 0.76      | 3         | 3         | 0.28      | 3:18:26  | 0.0        | y    | y      |
| 3459 | Hannover                | 5000      | 1.150            | 1.0       | 0.76      | 3         | 3         | 0.25      | 5:33:15  | 0.2        | y    | y      |
| 3460 | Krefeld                 | 5000      | 1.100            | 1.0       | 0.76      | 3         | 3         | 0.28      | 5:25:51  | 0.13       | y    | y      |
| 3461 | Münster                 | 5000      | 1.062            | 1.0       | 0.76      | 3         | 3         | 0.31      | 5:17:53  | 0.0        | y    | y      |
| 3462 | Paderborn               | 5000      | 1.048            | 1.0       | 0.76      | 3         | 3         | 0.3       | 11:02:51 | 0.0        | n    | y      |
| 3463 | Detmold                 | 5000      | 1.049            | 1.0       | 0.76      | 3         | 3         | 0.36      | 2:38:18  | 0.0        | y    | y      |
| 3464 | Bielefeld               | 5000      | 1.051            | 1.0       | 0.76      | 3         | 3         | 0.36      | 6:22:30  | 0.18       | y    | y      |
| 3465 | Gütersloh               | 5000      | 1.062            | 1.0       | 0.76      | 3         | 3         | 0.29      | *        | *          | *    | *      |
| 3466 | Soest                   | 5000      | 1.054            | 1.0       | 0.76      | 3         | 3         | 0.34      | *        | *          | *    | *      |
| 3467 | Dortmund                | 5000      | 1.074            | 1.0       | 0.76      | 3         | 3         | 0.31      | *        | *          | *    | *      |
| 3468 | Kassel                  | 5000      | 1.073            | 1.0       | 0.76      | 3         | 3         | 0.31      | *        | *          | *    | *      |
| 3469 | Hannover                | 5000      | 1.150            | 1.0       | 0.76      | 3         | 3         | 0.33      | *        | *          | *    | *      |

| #    | Network characteristics |           |                  |           |           |           |           | Solution  |          | Simulation |      |        |
|------|-------------------------|-----------|------------------|-----------|-----------|-----------|-----------|-----------|----------|------------|------|--------|
|      | <i>cn</i>               | <i>bu</i> | $\frac{n_l}{bu}$ | <i>lf</i> | <i>tr</i> | <i>lt</i> | <i>tt</i> | <i>as</i> | Time     | Gap        | Volt | Ampere |
| 3470 | Krefeld                 | 5000      | 1.100            | 1.0       | 0.76      | 3         | 3         | 0.31      | 3:26:19  | 0.09       | y    | y      |
| 3471 | Münster                 | 5000      | 1.062            | 1.0       | 0.76      | 3         | 3         | 0.37      | *        | *          | *    | *      |
| 3472 | Paderborn               | 5000      | 1.048            | 1.0       | 0.76      | 3         | 3         | 0.41      | 14:43:40 | 0.46       | y    | y      |
| 3473 | Detmold                 | 5000      | 1.049            | 1.0       | 0.76      | 3         | 3         | 0.37      | *        | *          | *    | *      |
| 3474 | Bielefeld               | 5000      | 1.050            | 1.0       | 0.76      | 3         | 3         | 0.37      | *        | *          | *    | *      |
| 3475 | Gütersloh               | 5000      | 1.062            | 1.0       | 0.76      | 3         | 3         | 0.38      | *        | *          | *    | *      |
| 3476 | Soest                   | 5000      | 1.054            | 1.0       | 0.76      | 3         | 3         | 0.4       | *        | *          | *    | *      |
| 3477 | Dortmund                | 5000      | 1.074            | 1.0       | 0.76      | 3         | 3         | 0.38      | *        | *          | *    | *      |
| 3478 | Kassel                  | 5000      | 1.073            | 1.0       | 0.76      | 3         | 3         | 0.39      | *        | *          | *    | *      |
| 3479 | Hannover                | 5000      | 1.150            | 1.0       | 0.76      | 3         | 3         | 0.4       | *        | *          | *    | *      |
| 3480 | Krefeld                 | 5000      | 1.100            | 1.0       | 0.76      | 3         | 3         | 0.4       | *        | *          | *    | *      |
| 3481 | Münster                 | 5000      | 1.062            | 1.0       | 0.76      | 4         | 4         | 0.31      | 2:05:29  | 0.0        | y    | y      |
| 3482 | Paderborn               | 5000      | 1.048            | 1.0       | 0.76      | 4         | 4         | 0.32      | 1:47:44  | 0.0        | y    | y      |
| 3483 | Detmold                 | 5000      | 1.049            | 1.0       | 0.76      | 4         | 4         | 0.29      | 6:27:01  | 0.0        | y    | y      |
| 3484 | Bielefeld               | 5000      | 1.051            | 1.0       | 0.76      | 4         | 4         | 0.36      | 1:48:00  | 0.03       | y    | y      |
| 3485 | Gütersloh               | 5000      | 1.062            | 1.0       | 0.76      | 4         | 4         | 0.3       | *        | *          | *    | *      |
| 3486 | Soest                   | 5000      | 1.054            | 1.0       | 0.76      | 4         | 4         | 0.32      | 0:24:47  | 0.0        | y    | y      |
| 3487 | Dortmund                | 5000      | 1.074            | 1.0       | 0.76      | 4         | 4         | 0.27      | 1:40:36  | 0.0        | y    | y      |
| 3488 | Kassel                  | 5000      | 1.073            | 1.0       | 0.76      | 4         | 4         | 0.27      | *        | *          | *    | *      |
| 3489 | Hannover                | 5000      | 1.149            | 1.0       | 0.76      | 4         | 4         | 0.3       | *        | *          | *    | *      |
| 3490 | Krefeld                 | 5000      | 1.100            | 1.0       | 0.76      | 4         | 4         | 0.37      | 1:57:01  | 0.0        | y    | y      |
| 3491 | Münster                 | 5000      | 1.062            | 1.0       | 0.76      | 4         | 4         | 0.35      | 2:53:38  | 0.0        | y    | y      |
| 3492 | Paderborn               | 5000      | 1.048            | 1.0       | 0.76      | 4         | 4         | 0.35      | *        | *          | *    | *      |
| 3493 | Detmold                 | 5000      | 1.049            | 1.0       | 0.76      | 4         | 4         | 0.32      | *        | *          | *    | *      |
| 3494 | Bielefeld               | 5000      | 1.050            | 1.0       | 0.76      | 4         | 4         | 0.37      | *        | *          | *    | *      |
| 3495 | Gütersloh               | 5000      | 1.062            | 1.0       | 0.76      | 4         | 4         | 0.31      | *        | *          | *    | *      |
| 3496 | Soest                   | 5000      | 1.054            | 1.0       | 0.76      | 4         | 4         | 0.36      | *        | *          | *    | *      |
| 3497 | Dortmund                | 5000      | 1.074            | 1.0       | 0.76      | 4         | 4         | 0.33      | *        | *          | *    | *      |
| 3498 | Kassel                  | 5000      | 1.073            | 1.0       | 0.76      | 4         | 4         | 0.32      | 3:26:31  | 0.0        | y    | y      |
| 3499 | Hannover                | 5000      | 1.150            | 1.0       | 0.76      | 4         | 4         | 0.35      | 37:29:00 | 0.49       | y    | y      |
| 3500 | Krefeld                 | 5000      | 1.100            | 1.0       | 0.76      | 4         | 4         | 0.33      | *        | *          | *    | *      |
| 3501 | Münster                 | 5000      | 1.062            | 1.0       | 0.76      | 4         | 4         | 0.39      | *        | *          | *    | *      |
| 3502 | Paderborn               | 5000      | 1.048            | 1.0       | 0.76      | 4         | 4         | 0.43      | *        | *          | *    | *      |
| 3503 | Detmold                 | 5000      | 1.049            | 1.0       | 0.76      | 4         | 4         | 0.38      | *        | *          | *    | *      |
| 3504 | Bielefeld               | 5000      | 1.050            | 1.0       | 0.76      | 4         | 4         | 0.41      | *        | *          | *    | *      |
| 3505 | Gütersloh               | 5000      | 1.062            | 1.0       | 0.76      | 4         | 4         | 0.41      | *        | *          | *    | *      |
| 3506 | Soest                   | 5000      | 1.054            | 1.0       | 0.76      | 4         | 4         | 0.41      | *        | *          | *    | *      |
| 3507 | Dortmund                | 5000      | 1.074            | 1.0       | 0.76      | 4         | 4         | 0.39      | *        | *          | *    | *      |
| 3508 | Kassel                  | 5000      | 1.073            | 1.0       | 0.76      | 4         | 4         | 0.4       | *        | *          | *    | *      |
| 3509 | Hannover                | 5000      | 1.149            | 1.0       | 0.76      | 4         | 4         | 0.41      | *        | *          | *    | *      |
| 3510 | Krefeld                 | 5000      | 1.100            | 1.0       | 0.76      | 4         | 4         | 0.41      | *        | *          | *    | *      |
| 3511 | Münster                 | 5000      | 1.064            | 0.83      | 1.0       | 2         | 2         | 0.23      | 1:06:16  | 0.0        | y    | y      |
| 3512 | Paderborn               | 5000      | 1.050            | 0.83      | 1.0       | 2         | 2         | 0.21      | 0:46:18  | 0.0        | y    | y      |
| 3513 | Detmold                 | 5000      | 1.052            | 0.83      | 1.0       | 2         | 2         | 0.24      | 0:44:26  | 0.0        | y    | y      |
| 3514 | Bielefeld               | 5000      | 1.051            | 0.83      | 1.0       | 2         | 2         | 0.22      | 0:52:53  | 0.0        | y    | y      |
| 3515 | Gütersloh               | 5000      | 1.063            | 0.83      | 1.0       | 2         | 2         | 0.25      | 1:16:45  | 0.0        | y    | y      |
| 3516 | Soest                   | 5000      | 1.056            | 0.83      | 1.0       | 2         | 2         | 0.23      | 0:47:00  | 0.0        | y    | y      |
| 3517 | Dortmund                | 5000      | 1.076            | 0.83      | 1.0       | 2         | 2         | 0.23      | 1:00:14  | 0.0        | y    | y      |
| 3518 | Kassel                  | 5000      | 1.074            | 0.83      | 1.0       | 2         | 2         | 0.21      | *        | *          | *    | *      |
| 3519 | Hannover                | 5000      | 1.151            | 0.83      | 1.0       | 2         | 2         | 0.24      | 1:28:13  | 0.0        | y    | y      |
| 3520 | Krefeld                 | 5000      | 1.102            | 0.83      | 1.0       | 2         | 2         | 0.22      | 5:24:04  | 0.0        | y    | y      |
| 3521 | Münster                 | 5000      | 1.064            | 0.83      | 1.0       | 2         | 2         | 0.28      | 8:59:43  | 0.0        | y    | y      |

| #    | Network characteristics |           |                  |           |           |           |           |           | Solution |      | Simulation |        |
|------|-------------------------|-----------|------------------|-----------|-----------|-----------|-----------|-----------|----------|------|------------|--------|
|      | <i>cn</i>               | <i>bu</i> | $\frac{n_l}{bu}$ | <i>lf</i> | <i>tr</i> | <i>lt</i> | <i>tt</i> | <i>as</i> | Time     | Gap  | Volt       | Ampere |
| 3522 | Paderborn               | 5000      | 1.049            | 0.83      | 1.0       | 2         | 2         | 0.29      | 2:30:04  | 0.1  | y          | y      |
| 3523 | Detmold                 | 5000      | 1.052            | 0.83      | 1.0       | 2         | 2         | 0.29      | 3:51:36  | 0.0  | y          | y      |
| 3524 | Bielefeld               | 5000      | 1.051            | 0.83      | 1.0       | 2         | 2         | 0.29      | 2:43:46  | 0.0  | y          | y      |
| 3525 | Gütersloh               | 5000      | 1.063            | 0.83      | 1.0       | 2         | 2         | 0.3       | 22:06:19 | 0.08 | y          | y      |
| 3526 | Soest                   | 5000      | 1.056            | 0.83      | 1.0       | 2         | 2         | 0.3       | 1:29:13  | 0.0  | y          | y      |
| 3527 | Dortmund                | 5000      | 1.076            | 0.83      | 1.0       | 2         | 2         | 0.3       | 5:37:23  | 0.0  | y          | y      |
| 3528 | Kassel                  | 5000      | 1.074            | 0.83      | 1.0       | 2         | 2         | 0.27      | 9:53:16  | 0.0  | y          | y      |
| 3529 | Hannover                | 5000      | 1.152            | 0.83      | 1.0       | 2         | 2         | 0.3       | *        | *    | *          | *      |
| 3530 | Krefeld                 | 5000      | 1.102            | 0.83      | 1.0       | 2         | 2         | 0.3       | 1:33:49  | 0.0  | y          | y      |
| 3531 | Münster                 | 5000      | 1.064            | 0.83      | 1.0       | 2         | 2         | 0.36      | *        | *    | *          | *      |
| 3532 | Paderborn               | 5000      | 1.050            | 0.83      | 1.0       | 2         | 2         | 0.36      | 2:59:54  | 0.0  | n          | y      |
| 3533 | Detmold                 | 5000      | 1.052            | 0.83      | 1.0       | 2         | 2         | 0.37      | 2:00:49  | 0.0  | y          | y      |
| 3534 | Bielefeld               | 5000      | 1.051            | 0.83      | 1.0       | 2         | 2         | 0.37      | 1:31:29  | 0.0  | y          | y      |
| 3535 | Gütersloh               | 5000      | 1.063            | 0.83      | 1.0       | 2         | 2         | 0.35      | 15:03:07 | 0.17 | y          | y      |
| 3536 | Soest                   | 5000      | 1.056            | 0.83      | 1.0       | 2         | 2         | 0.35      | *        | *    | *          | *      |
| 3537 | Dortmund                | 5000      | 1.076            | 0.83      | 1.0       | 2         | 2         | 0.33      | 9:33:04  | 0.14 | y          | y      |
| 3538 | Kassel                  | 5000      | 1.074            | 0.83      | 1.0       | 2         | 2         | 0.35      | 5:14:49  | 0.0  | y          | y      |
| 3539 | Hannover                | 5000      | 1.152            | 0.83      | 1.0       | 2         | 2         | 0.36      | *        | *    | *          | *      |
| 3540 | Krefeld                 | 5000      | 1.102            | 0.83      | 1.0       | 2         | 2         | 0.36      | *        | *    | *          | *      |
| 3541 | Münster                 | 5000      | 1.064            | 0.83      | 1.0       | 3         | 3         | 0.25      | 9:13:07  | 0.0  | y          | y      |
| 3542 | Paderborn               | 5000      | 1.050            | 0.83      | 1.0       | 3         | 3         | 0.23      | 1:05:48  | 0.0  | y          | y      |
| 3543 | Detmold                 | 5000      | 1.052            | 0.83      | 1.0       | 3         | 3         | 0.26      | 1:52:47  | 0.32 | y          | y      |
| 3544 | Bielefeld               | 5000      | 1.051            | 0.83      | 1.0       | 3         | 3         | 0.24      | 0:30:21  | 0.0  | y          | y      |
| 3545 | Gütersloh               | 5000      | 1.063            | 0.83      | 1.0       | 3         | 3         | 0.27      | 0:31:28  | 0.0  | y          | y      |
| 3546 | Soest                   | 5000      | 1.056            | 0.83      | 1.0       | 3         | 3         | 0.25      | 2:30:20  | 0.0  | y          | y      |
| 3547 | Dortmund                | 5000      | 1.076            | 0.83      | 1.0       | 3         | 3         | 0.25      | 0:27:34  | 0.0  | y          | y      |
| 3548 | Kassel                  | 5000      | 1.074            | 0.83      | 1.0       | 3         | 3         | 0.23      | 1:43:29  | 0.0  | y          | y      |
| 3549 | Hannover                | 5000      | 1.152            | 0.83      | 1.0       | 3         | 3         | 0.25      | *        | *    | *          | *      |
| 3550 | Krefeld                 | 5000      | 1.102            | 0.83      | 1.0       | 3         | 3         | 0.23      | 5:33:02  | 0.0  | y          | y      |
| 3551 | Münster                 | 5000      | 1.064            | 0.83      | 1.0       | 3         | 3         | 0.32      | 0:38:10  | 0.0  | y          | y      |
| 3552 | Paderborn               | 5000      | 1.049            | 0.83      | 1.0       | 3         | 3         | 0.31      | 11:57:20 | 0.0  | y          | y      |
| 3553 | Detmold                 | 5000      | 1.052            | 0.83      | 1.0       | 3         | 3         | 0.31      | 5:04:29  | 0.0  | y          | y      |
| 3554 | Bielefeld               | 5000      | 1.051            | 0.83      | 1.0       | 3         | 3         | 0.29      | 4:01:50  | 0.1  | y          | y      |
| 3555 | Gütersloh               | 5000      | 1.063            | 0.83      | 1.0       | 3         | 3         | 0.31      | *        | *    | *          | *      |
| 3556 | Soest                   | 5000      | 1.056            | 0.83      | 1.0       | 3         | 3         | 0.31      | 2:41:23  | 0.0  | y          | y      |
| 3557 | Dortmund                | 5000      | 1.076            | 0.83      | 1.0       | 3         | 3         | 0.31      | 9:40:52  | 0.0  | y          | y      |
| 3558 | Kassel                  | 5000      | 1.074            | 0.83      | 1.0       | 3         | 3         | 0.29      | *        | *    | *          | *      |
| 3559 | Hannover                | 5000      | 1.151            | 0.83      | 1.0       | 3         | 3         | 0.29      | *        | *    | *          | *      |
| 3560 | Krefeld                 | 5000      | 1.102            | 0.83      | 1.0       | 3         | 3         | 0.32      | 9:57:44  | 0.0  | y          | y      |
| 3561 | Münster                 | 5000      | 1.064            | 0.83      | 1.0       | 3         | 3         | 0.37      | *        | *    | *          | *      |
| 3562 | Paderborn               | 5000      | 1.049            | 0.83      | 1.0       | 3         | 3         | 0.37      | 4:30:18  | 0.07 | y          | y      |
| 3563 | Detmold                 | 5000      | 1.052            | 0.83      | 1.0       | 3         | 3         | 0.38      | *        | *    | *          | *      |
| 3564 | Bielefeld               | 5000      | 1.051            | 0.83      | 1.0       | 3         | 3         | 0.38      | 4:05:01  | 0.0  | y          | y      |
| 3565 | Gütersloh               | 5000      | 1.063            | 0.83      | 1.0       | 3         | 3         | 0.36      | *        | *    | *          | *      |
| 3566 | Soest                   | 5000      | 1.056            | 0.83      | 1.0       | 3         | 3         | 0.36      | *        | *    | *          | *      |
| 3567 | Dortmund                | 5000      | 1.077            | 0.83      | 1.0       | 3         | 3         | 0.36      | *        | *    | *          | *      |
| 3568 | Kassel                  | 5000      | 1.074            | 0.83      | 1.0       | 3         | 3         | 0.36      | *        | *    | *          | *      |
| 3569 | Hannover                | 5000      | 1.151            | 0.83      | 1.0       | 3         | 3         | 0.37      | *        | *    | *          | *      |
| 3570 | Krefeld                 | 5000      | 1.102            | 0.83      | 1.0       | 3         | 3         | 0.38      | 2:48:53  | 0.18 | y          | y      |
| 3571 | Münster                 | 5000      | 1.064            | 0.83      | 1.0       | 4         | 4         | 0.27      | 21:58:50 | 0.0  | y          | y      |
| 3572 | Paderborn               | 5000      | 1.049            | 0.83      | 1.0       | 4         | 4         | 0.26      | 0:52:42  | 0.0  | y          | y      |
| 3573 | Detmold                 | 5000      | 1.052            | 0.83      | 1.0       | 4         | 4         | 0.28      | 20:25:56 | 0.3  | y          | y      |

| #    | Network characteristics |           |                 |           |           |           |           |           | Solution |      | Simulation |        |
|------|-------------------------|-----------|-----------------|-----------|-----------|-----------|-----------|-----------|----------|------|------------|--------|
|      | <i>cn</i>               | <i>bu</i> | $\frac{nI}{bu}$ | <i>lf</i> | <i>tr</i> | <i>lt</i> | <i>tt</i> | <i>as</i> | Time     | Gap  | Volt       | Ampere |
| 3574 | Bielefeld               | 5000      | 1.051           | 0.83      | 1.0       | 4         | 4         | 0.25      | 2:45:32  | 0.0  | y          | y      |
| 3575 | Gütersloh               | 5000      | 1.063           | 0.83      | 1.0       | 4         | 4         | 0.29      | 4:42:38  | 0.0  | y          | y      |
| 3576 | Soest                   | 5000      | 1.056           | 0.83      | 1.0       | 4         | 4         | 0.27      | 2:00:47  | 0.0  | y          | y      |
| 3577 | Dortmund                | 5000      | 1.076           | 0.83      | 1.0       | 4         | 4         | 0.34      | 4:40:53  | 0.0  | y          | y      |
| 3578 | Kassel                  | 5000      | 1.074           | 0.83      | 1.0       | 4         | 4         | 0.25      | 1:19:44  | 0.0  | y          | y      |
| 3579 | Hannover                | 5000      | 1.152           | 0.83      | 1.0       | 4         | 4         | 0.27      | *        | *    | *          | *      |
| 3580 | Krefeld                 | 5000      | 1.102           | 0.83      | 1.0       | 4         | 4         | 0.31      | 2:19:21  | 0.0  | y          | y      |
| 3581 | Münster                 | 5000      | 1.064           | 0.83      | 1.0       | 4         | 4         | 0.31      | *        | *    | *          | *      |
| 3582 | Paderborn               | 5000      | 1.049           | 0.83      | 1.0       | 4         | 4         | 0.33      | *        | *    | *          | *      |
| 3583 | Detmold                 | 5000      | 1.052           | 0.83      | 1.0       | 4         | 4         | 0.32      | 9:07:30  | 0.18 | y          | y      |
| 3584 | Bielefeld               | 5000      | 1.051           | 0.83      | 1.0       | 4         | 4         | 0.3       | 2:46:53  | 0.37 | y          | y      |
| 3585 | Gütersloh               | 5000      | 1.063           | 0.83      | 1.0       | 4         | 4         | 0.33      | 9:51:25  | 0.0  | y          | y      |
| 3586 | Soest                   | 5000      | 1.056           | 0.83      | 1.0       | 4         | 4         | 0.32      | 4:12:09  | 0.0  | y          | y      |
| 3587 | Dortmund                | 5000      | 1.076           | 0.83      | 1.0       | 4         | 4         | 0.31      | 15:43:47 | 0.09 | y          | y      |
| 3588 | Kassel                  | 5000      | 1.074           | 0.83      | 1.0       | 4         | 4         | 0.3       | *        | *    | *          | *      |
| 3589 | Hannover                | 5000      | 1.152           | 0.83      | 1.0       | 4         | 4         | 0.34      | *        | *    | *          | *      |
| 3590 | Krefeld                 | 5000      | 1.102           | 0.83      | 1.0       | 4         | 4         | 0.34      | 2:42:10  | 0.0  | y          | y      |
| 3591 | Münster                 | 5000      | 1.064           | 0.83      | 1.0       | 4         | 4         | 0.39      | *        | *    | *          | *      |
| 3592 | Paderborn               | 5000      | 1.049           | 0.83      | 1.0       | 4         | 4         | 0.39      | 10:19:42 | 0.0  | y          | y      |
| 3593 | Detmold                 | 5000      | 1.052           | 0.83      | 1.0       | 4         | 4         | 0.39      | *        | *    | *          | *      |
| 3594 | Bielefeld               | 5000      | 1.051           | 0.83      | 1.0       | 4         | 4         | 0.4       | *        | *    | *          | *      |
| 3595 | Gütersloh               | 5000      | 1.063           | 0.83      | 1.0       | 4         | 4         | 0.37      | *        | *    | *          | *      |
| 3596 | Soest                   | 5000      | 1.056           | 0.83      | 1.0       | 4         | 4         | 0.37      | *        | *    | *          | *      |
| 3597 | Dortmund                | 5000      | 1.076           | 0.83      | 1.0       | 4         | 4         | 0.36      | *        | *    | *          | *      |
| 3598 | Kassel                  | 5000      | 1.074           | 0.83      | 1.0       | 4         | 4         | 0.37      | *        | *    | *          | *      |
| 3599 | Hannover                | 5000      | 1.151           | 0.83      | 1.0       | 4         | 4         | 0.38      | *        | *    | *          | *      |
| 3600 | Krefeld                 | 5000      | 1.102           | 0.83      | 1.0       | 4         | 4         | 0.39      | *        | *    | *          | *      |
| 3601 | Münster                 | 5000      | 1.064           | 1.34      | 1.0       | 2         | 2         | 0.23      | 1:03:49  | 0.0  | y          | y      |
| 3602 | Paderborn               | 5000      | 1.049           | 1.34      | 1.0       | 2         | 2         | 0.22      | 0:43:32  | 0.0  | y          | y      |
| 3603 | Detmold                 | 5000      | 1.052           | 1.34      | 1.0       | 2         | 2         | 0.24      | 1:18:14  | 0.0  | y          | y      |
| 3604 | Bielefeld               | 5000      | 1.051           | 1.34      | 1.0       | 2         | 2         | 0.22      | 0:56:19  | 0.0  | y          | y      |
| 3605 | Gütersloh               | 5000      | 1.063           | 1.34      | 1.0       | 2         | 2         | 0.25      | 0:45:19  | 0.0  | y          | y      |
| 3606 | Soest                   | 5000      | 1.056           | 1.34      | 1.0       | 2         | 2         | 0.23      | 1:45:56  | 0.1  | y          | y      |
| 3607 | Dortmund                | 5000      | 1.076           | 1.34      | 1.0       | 2         | 2         | 0.23      | 1:10:54  | 0.0  | y          | y      |
| 3608 | Kassel                  | 5000      | 1.074           | 1.34      | 1.0       | 2         | 2         | 0.21      | 0:53:01  | 0.0  | y          | y      |
| 3609 | Hannover                | 5000      | 1.151           | 1.34      | 1.0       | 2         | 2         | 0.24      | 1:28:34  | 0.0  | y          | y      |
| 3610 | Krefeld                 | 5000      | 1.102           | 1.34      | 1.0       | 2         | 2         | 0.26      | 2:17:51  | 0.0  | y          | y      |
| 3611 | Münster                 | 5000      | 1.064           | 1.34      | 1.0       | 2         | 2         | 0.28      | *        | *    | *          | *      |
| 3612 | Paderborn               | 5000      | 1.049           | 1.34      | 1.0       | 2         | 2         | 0.29      | *        | *    | *          | *      |
| 3613 | Detmold                 | 5000      | 1.052           | 1.34      | 1.0       | 2         | 2         | 0.29      | 13:02:25 | 0.2  | y          | y      |
| 3614 | Bielefeld               | 5000      | 1.052           | 1.34      | 1.0       | 2         | 2         | 0.29      | 17:21:11 | 0.09 | y          | y      |
| 3615 | Gütersloh               | 5000      | 1.063           | 1.34      | 1.0       | 2         | 2         | 0.3       | *        | *    | *          | *      |
| 3616 | Soest                   | 5000      | 1.056           | 1.34      | 1.0       | 2         | 2         | 0.3       | 4:20:09  | 0.0  | y          | y      |
| 3617 | Dortmund                | 5000      | 1.076           | 1.34      | 1.0       | 2         | 2         | 0.28      | 0:55:36  | 0.0  | y          | y      |
| 3618 | Kassel                  | 5000      | 1.074           | 1.34      | 1.0       | 2         | 2         | 0.27      | *        | *    | *          | *      |
| 3619 | Hannover                | 5000      | 1.152           | 1.34      | 1.0       | 2         | 2         | 0.3       | *        | *    | *          | *      |
| 3620 | Krefeld                 | 5000      | 1.102           | 1.34      | 1.0       | 2         | 2         | 0.3       | *        | *    | *          | *      |
| 3621 | Münster                 | 5000      | 1.064           | 1.34      | 1.0       | 2         | 2         | 0.36      | *        | *    | *          | *      |
| 3622 | Paderborn               | 5000      | 1.049           | 1.34      | 1.0       | 2         | 2         | 0.36      | 1:21:42  | 0.0  | y          | y      |
| 3623 | Detmold                 | 5000      | 1.052           | 1.34      | 1.0       | 2         | 2         | 0.37      | *        | *    | *          | *      |
| 3624 | Bielefeld               | 5000      | 1.051           | 1.34      | 1.0       | 2         | 2         | 0.37      | 1:35:35  | 0.0  | y          | y      |
| 3625 | Gütersloh               | 5000      | 1.063           | 1.34      | 1.0       | 2         | 2         | 0.35      | *        | *    | *          | *      |

| #    | Network characteristics |           |                 |           |           |           |           |           | Solution |      | Simulation |        |
|------|-------------------------|-----------|-----------------|-----------|-----------|-----------|-----------|-----------|----------|------|------------|--------|
|      | <i>cn</i>               | <i>bu</i> | $\frac{nl}{bu}$ | <i>lf</i> | <i>tr</i> | <i>lt</i> | <i>tt</i> | <i>as</i> | Time     | Gap  | Volt       | Ampere |
| 3626 | Soest                   | 5000      | 1.056           | 1.34      | 1.0       | 2         | 2         | 0.36      | *        | *    | *          | *      |
| 3627 | Dortmund                | 5000      | 1.076           | 1.34      | 1.0       | 2         | 2         | 0.33      | *        | *    | *          | *      |
| 3628 | Kassel                  | 5000      | 1.074           | 1.34      | 1.0       | 2         | 2         | 0.35      | 6:36:07  | 0.0  | y          | y      |
| 3629 | Hannover                | 5000      | 1.151           | 1.34      | 1.0       | 2         | 2         | 0.36      | *        | *    | *          | *      |
| 3630 | Krefeld                 | 5000      | 1.102           | 1.34      | 1.0       | 2         | 2         | 0.36      | *        | *    | *          | *      |
| 3631 | Münster                 | 5000      | 1.064           | 1.34      | 1.0       | 3         | 3         | 0.25      | 16:28:26 | 0.18 | y          | y      |
| 3632 | Paderborn               | 5000      | 1.049           | 1.34      | 1.0       | 3         | 3         | 0.24      | 0:59:22  | 0.0  | y          | y      |
| 3633 | Detmold                 | 5000      | 1.052           | 1.34      | 1.0       | 3         | 3         | 0.26      | *        | *    | *          | *      |
| 3634 | Bielefeld               | 5000      | 1.051           | 1.34      | 1.0       | 3         | 3         | 0.27      | 4:49:27  | 0.0  | y          | y      |
| 3635 | Gütersloh               | 5000      | 1.063           | 1.34      | 1.0       | 3         | 3         | 0.27      | 2:12:54  | 0.0  | y          | y      |
| 3636 | Soest                   | 5000      | 1.056           | 1.34      | 1.0       | 3         | 3         | 0.25      | 0:41:24  | 0.0  | y          | y      |
| 3637 | Dortmund                | 5000      | 1.076           | 1.34      | 1.0       | 3         | 3         | 0.25      | 1:07:19  | 0.0  | y          | y      |
| 3638 | Kassel                  | 5000      | 1.074           | 1.34      | 1.0       | 3         | 3         | 0.23      | 0:34:09  | 0.0  | y          | y      |
| 3639 | Hannover                | 5000      | 1.151           | 1.34      | 1.0       | 3         | 3         | 0.27      | 2:26:38  | 0.0  | y          | y      |
| 3640 | Krefeld                 | 5000      | 1.102           | 1.34      | 1.0       | 3         | 3         | 0.29      | 5:51:43  | 0.0  | y          | y      |
| 3641 | Münster                 | 5000      | 1.064           | 1.34      | 1.0       | 3         | 3         | 0.3       | *        | *    | *          | *      |
| 3642 | Paderborn               | 5000      | 1.050           | 1.34      | 1.0       | 3         | 3         | 0.33      | 2:34:40  | 0.0  | y          | y      |
| 3643 | Detmold                 | 5000      | 1.052           | 1.34      | 1.0       | 3         | 3         | 0.31      | *        | *    | *          | *      |
| 3644 | Bielefeld               | 5000      | 1.052           | 1.34      | 1.0       | 3         | 3         | 0.29      | 1:30:31  | 0.0  | y          | y      |
| 3645 | Gütersloh               | 5000      | 1.063           | 1.34      | 1.0       | 3         | 3         | 0.31      | *        | *    | *          | *      |
| 3646 | Soest                   | 5000      | 1.056           | 1.34      | 1.0       | 3         | 3         | 0.31      | 18:11:34 | 0.0  | y          | y      |
| 3647 | Dortmund                | 5000      | 1.076           | 1.34      | 1.0       | 3         | 3         | 0.29      | 1:52:56  | 0.0  | y          | y      |
| 3648 | Kassel                  | 5000      | 1.074           | 1.34      | 1.0       | 3         | 3         | 0.29      | *        | *    | *          | *      |
| 3649 | Hannover                | 5000      | 1.151           | 1.34      | 1.0       | 3         | 3         | 0.29      | *        | *    | *          | *      |
| 3650 | Krefeld                 | 5000      | 1.102           | 1.34      | 1.0       | 3         | 3         | 0.32      | *        | *    | *          | *      |
| 3651 | Münster                 | 5000      | 1.064           | 1.34      | 1.0       | 3         | 3         | 0.37      | *        | *    | *          | *      |
| 3652 | Paderborn               | 5000      | 1.050           | 1.34      | 1.0       | 3         | 3         | 0.36      | 22:51:02 | 0.07 | n          | y      |
| 3653 | Detmold                 | 5000      | 1.052           | 1.34      | 1.0       | 3         | 3         | 0.38      | *        | *    | *          | *      |
| 3654 | Bielefeld               | 5000      | 1.051           | 1.34      | 1.0       | 3         | 3         | 0.37      | *        | *    | *          | *      |
| 3655 | Gütersloh               | 5000      | 1.063           | 1.34      | 1.0       | 3         | 3         | 0.36      | *        | *    | *          | *      |
| 3656 | Soest                   | 5000      | 1.056           | 1.34      | 1.0       | 3         | 3         | 0.38      | *        | *    | *          | *      |
| 3657 | Dortmund                | 5000      | 1.076           | 1.34      | 1.0       | 3         | 3         | 0.35      | *        | *    | *          | *      |
| 3658 | Kassel                  | 5000      | 1.074           | 1.34      | 1.0       | 3         | 3         | 0.36      | *        | *    | *          | *      |
| 3659 | Hannover                | 5000      | 1.150           | 1.34      | 1.0       | 3         | 3         | 0.36      | *        | *    | *          | *      |
| 3660 | Krefeld                 | 5000      | 1.102           | 1.34      | 1.0       | 3         | 3         | 0.38      | *        | *    | *          | *      |
| 3661 | Münster                 | 5000      | 1.064           | 1.34      | 1.0       | 4         | 4         | 0.27      | *        | *    | *          | *      |
| 3662 | Paderborn               | 5000      | 1.050           | 1.34      | 1.0       | 4         | 4         | 0.28      | 0:51:36  | 0.0  | y          | y      |
| 3663 | Detmold                 | 5000      | 1.052           | 1.34      | 1.0       | 4         | 4         | 0.28      | 13:49:02 | 0.39 | y          | y      |
| 3664 | Bielefeld               | 5000      | 1.051           | 1.34      | 1.0       | 4         | 4         | 0.24      | 15:38:33 | 0.05 | y          | y      |
| 3665 | Gütersloh               | 5000      | 1.063           | 1.34      | 1.0       | 4         | 4         | 0.29      | 10:00:36 | 0.0  | y          | y      |
| 3666 | Soest                   | 5000      | 1.056           | 1.34      | 1.0       | 4         | 4         | 0.27      | 6:00:41  | 0.0  | y          | y      |
| 3667 | Dortmund                | 5000      | 1.076           | 1.34      | 1.0       | 4         | 4         | 0.27      | 8:19:54  | 0.0  | y          | y      |
| 3668 | Kassel                  | 5000      | 1.074           | 1.34      | 1.0       | 4         | 4         | 0.25      | 1:15:47  | 0.0  | y          | y      |
| 3669 | Hannover                | 5000      | 1.151           | 1.34      | 1.0       | 4         | 4         | 0.29      | 2:33:27  | 0.0  | y          | y      |
| 3670 | Krefeld                 | 5000      | 1.102           | 1.34      | 1.0       | 4         | 4         | 0.31      | 10:45:50 | 0.33 | y          | y      |
| 3671 | Münster                 | 5000      | 1.064           | 1.34      | 1.0       | 4         | 4         | 0.33      | *        | *    | *          | *      |
| 3672 | Paderborn               | 5000      | 1.050           | 1.34      | 1.0       | 4         | 4         | 0.32      | *        | *    | *          | *      |
| 3673 | Detmold                 | 5000      | 1.052           | 1.34      | 1.0       | 4         | 4         | 0.32      | *        | *    | *          | *      |
| 3674 | Bielefeld               | 5000      | 1.051           | 1.34      | 1.0       | 4         | 4         | 0.32      | *        | *    | *          | *      |
| 3675 | Gütersloh               | 5000      | 1.063           | 1.34      | 1.0       | 4         | 4         | 0.33      | *        | *    | *          | *      |
| 3676 | Soest                   | 5000      | 1.056           | 1.34      | 1.0       | 4         | 4         | 0.32      | 24:37:53 | 0.0  | y          | y      |
| 3677 | Dortmund                | 5000      | 1.076           | 1.34      | 1.0       | 4         | 4         | 0.31      | 6:58:54  | 0.07 | y          | y      |

| #    | Network characteristics |           |                  |           |           |           |           |           | Solution |      | Simulation |        |
|------|-------------------------|-----------|------------------|-----------|-----------|-----------|-----------|-----------|----------|------|------------|--------|
|      | <i>cn</i>               | <i>bu</i> | $\frac{n_l}{bu}$ | <i>lf</i> | <i>tr</i> | <i>lt</i> | <i>tt</i> | <i>as</i> | Time     | Gap  | Volt       | Ampere |
| 3678 | Kassel                  | 5000      | 1.074            | 1.34      | 1.0       | 4         | 4         | 0.3       | *        | *    | *          | *      |
| 3679 | Hannover                | 5000      | 1.151            | 1.34      | 1.0       | 4         | 4         | 0.31      | *        | *    | *          | *      |
| 3680 | Krefeld                 | 5000      | 1.102            | 1.34      | 1.0       | 4         | 4         | 0.33      | *        | *    | *          | *      |
| 3681 | Münster                 | 5000      | 1.064            | 1.34      | 1.0       | 4         | 4         | 0.39      | *        | *    | *          | *      |
| 3682 | Paderborn               | 5000      | 1.050            | 1.34      | 1.0       | 4         | 4         | 0.38      | 2:02:58  | 0.0  | n          | y      |
| 3683 | Detmold                 | 5000      | 1.052            | 1.34      | 1.0       | 4         | 4         | 0.39      | *        | *    | *          | *      |
| 3684 | Bielefeld               | 5000      | 1.051            | 1.34      | 1.0       | 4         | 4         | 0.4       | 20:51:36 | 0.0  | y          | y      |
| 3685 | Gütersloh               | 5000      | 1.063            | 1.34      | 1.0       | 4         | 4         | 0.37      | *        | *    | *          | *      |
| 3686 | Soest                   | 5000      | 1.056            | 1.34      | 1.0       | 4         | 4         | 0.37      | *        | *    | *          | *      |
| 3687 | Dortmund                | 5000      | 1.076            | 1.34      | 1.0       | 4         | 4         | 0.39      | *        | *    | *          | *      |
| 3688 | Kassel                  | 5000      | 1.074            | 1.34      | 1.0       | 4         | 4         | 0.37      | *        | *    | *          | *      |
| 3689 | Hannover                | 5000      | 1.151            | 1.34      | 1.0       | 4         | 4         | 0.38      | *        | *    | *          | *      |
| 3690 | Krefeld                 | 5000      | 1.102            | 1.34      | 1.0       | 4         | 4         | 0.39      | *        | *    | *          | *      |
| 3691 | Münster                 | 5000      | 1.064            | 1.0       | 1.0       | 2         | 2         | 0.23      | 1:01:02  | 0.0  | y          | y      |
| 3692 | Paderborn               | 5000      | 1.049            | 1.0       | 1.0       | 2         | 2         | 0.22      | 0:49:44  | 0.0  | y          | y      |
| 3693 | Detmold                 | 5000      | 1.052            | 1.0       | 1.0       | 2         | 2         | 0.24      | 1:12:24  | 0.0  | y          | y      |
| 3694 | Bielefeld               | 5000      | 1.051            | 1.0       | 1.0       | 2         | 2         | 0.21      | 1:22:52  | 0.0  | y          | y      |
| 3695 | Gütersloh               | 5000      | 1.063            | 1.0       | 1.0       | 2         | 2         | 0.25      | 0:49:52  | 0.0  | y          | y      |
| 3696 | Soest                   | 5000      | 1.056            | 1.0       | 1.0       | 2         | 2         | 0.23      | 1:20:16  | 0.0  | y          | y      |
| 3697 | Dortmund                | 5000      | 1.076            | 1.0       | 1.0       | 2         | 2         | 0.26      | 0:56:31  | 0.0  | y          | y      |
| 3698 | Kassel                  | 5000      | 1.074            | 1.0       | 1.0       | 2         | 2         | 0.21      | 0:47:29  | 0.0  | y          | y      |
| 3699 | Hannover                | 5000      | 1.152            | 1.0       | 1.0       | 2         | 2         | 0.23      | *        | *    | *          | *      |
| 3700 | Krefeld                 | 5000      | 1.102            | 1.0       | 1.0       | 2         | 2         | 0.26      | 1:20:32  | 0.0  | y          | y      |
| 3701 | Münster                 | 5000      | 1.064            | 1.0       | 1.0       | 2         | 2         | 0.28      | 8:39:37  | 0.0  | y          | y      |
| 3702 | Paderborn               | 5000      | 1.050            | 1.0       | 1.0       | 2         | 2         | 0.29      | 1:20:36  | 0.0  | y          | y      |
| 3703 | Detmold                 | 5000      | 1.052            | 1.0       | 1.0       | 2         | 2         | 0.29      | 3:14:59  | 0.0  | y          | y      |
| 3704 | Bielefeld               | 5000      | 1.052            | 1.0       | 1.0       | 2         | 2         | 0.29      | 2:40:13  | 0.0  | y          | y      |
| 3705 | Gütersloh               | 5000      | 1.063            | 1.0       | 1.0       | 2         | 2         | 0.3       | *        | *    | *          | *      |
| 3706 | Soest                   | 5000      | 1.056            | 1.0       | 1.0       | 2         | 2         | 0.29      | 3:02:47  | 0.0  | y          | y      |
| 3707 | Dortmund                | 5000      | 1.076            | 1.0       | 1.0       | 2         | 2         | 0.29      | 0:33:12  | 0.0  | y          | y      |
| 3708 | Kassel                  | 5000      | 1.074            | 1.0       | 1.0       | 2         | 2         | 0.27      | 2:30:41  | 0.0  | y          | y      |
| 3709 | Hannover                | 5000      | 1.151            | 1.0       | 1.0       | 2         | 2         | 0.28      | 4:12:08  | 0.0  | y          | y      |
| 3710 | Krefeld                 | 5000      | 1.102            | 1.0       | 1.0       | 2         | 2         | 0.3       | 1:57:11  | 0.0  | y          | y      |
| 3711 | Münster                 | 5000      | 1.064            | 1.0       | 1.0       | 2         | 2         | 0.34      | *        | *    | *          | *      |
| 3712 | Paderborn               | 5000      | 1.049            | 1.0       | 1.0       | 2         | 2         | 0.36      | 1:22:21  | 0.0  | y          | y      |
| 3713 | Detmold                 | 5000      | 1.052            | 1.0       | 1.0       | 2         | 2         | 0.37      | *        | *    | *          | *      |
| 3714 | Bielefeld               | 5000      | 1.051            | 1.0       | 1.0       | 2         | 2         | 0.35      | 2:33:43  | 0.0  | y          | y      |
| 3715 | Gütersloh               | 5000      | 1.063            | 1.0       | 1.0       | 2         | 2         | 0.35      | *        | *    | *          | *      |
| 3716 | Soest                   | 5000      | 1.056            | 1.0       | 1.0       | 2         | 2         | 0.35      | *        | *    | *          | *      |
| 3717 | Dortmund                | 5000      | 1.076            | 1.0       | 1.0       | 2         | 2         | 0.36      | 2:58:45  | 0.0  | y          | y      |
| 3718 | Kassel                  | 5000      | 1.075            | 1.0       | 1.0       | 2         | 2         | 0.35      | *        | *    | *          | *      |
| 3719 | Hannover                | 5000      | 1.151            | 1.0       | 1.0       | 2         | 2         | 0.36      | *        | *    | *          | *      |
| 3720 | Krefeld                 | 5000      | 1.102            | 1.0       | 1.0       | 2         | 2         | 0.37      | *        | *    | *          | *      |
| 3721 | Münster                 | 5000      | 1.064            | 1.0       | 1.0       | 3         | 3         | 0.25      | 10:21:36 | 0.0  | y          | y      |
| 3722 | Paderborn               | 5000      | 1.050            | 1.0       | 1.0       | 3         | 3         | 0.23      | 1:10:41  | 0.0  | y          | y      |
| 3723 | Detmold                 | 5000      | 1.052            | 1.0       | 1.0       | 3         | 3         | 0.26      | 1:14:18  | 0.15 | y          | y      |
| 3724 | Bielefeld               | 5000      | 1.051            | 1.0       | 1.0       | 3         | 3         | 0.27      | 1:17:23  | 0.0  | y          | y      |
| 3725 | Gütersloh               | 5000      | 1.063            | 1.0       | 1.0       | 3         | 3         | 0.27      | 1:45:03  | 0.0  | y          | y      |
| 3726 | Soest                   | 5000      | 1.056            | 1.0       | 1.0       | 3         | 3         | 0.25      | 1:55:34  | 0.0  | y          | y      |
| 3727 | Dortmund                | 5000      | 1.076            | 1.0       | 1.0       | 3         | 3         | 0.25      | 1:07:16  | 0.0  | y          | y      |
| 3728 | Kassel                  | 5000      | 1.074            | 1.0       | 1.0       | 3         | 3         | 0.23      | 1:13:10  | 0.0  | y          | y      |
| 3729 | Hannover                | 5000      | 1.151            | 1.0       | 1.0       | 3         | 3         | 0.27      | *        | *    | *          | *      |

| #    | Network characteristics |           |                  |           |           |           |           | Solution  |          | Simulation |      |        |
|------|-------------------------|-----------|------------------|-----------|-----------|-----------|-----------|-----------|----------|------------|------|--------|
|      | <i>cn</i>               | <i>bu</i> | $\frac{n_l}{bu}$ | <i>lf</i> | <i>tr</i> | <i>lt</i> | <i>tt</i> | <i>as</i> | Time     | Gap        | Volt | Ampere |
| 3730 | Krefeld                 | 5000      | 1.102            | 1.0       | 1.0       | 3         | 3         | 0.29      | *        | *          | *    | *      |
| 3731 | Münster                 | 5000      | 1.064            | 1.0       | 1.0       | 3         | 3         | 0.3       | *        | *          | *    | *      |
| 3732 | Paderborn               | 5000      | 1.050            | 1.0       | 1.0       | 3         | 3         | 0.33      | 4:19:22  | 0.0        | y    | y      |
| 3733 | Detmold                 | 5000      | 1.052            | 1.0       | 1.0       | 3         | 3         | 0.31      | *        | *          | *    | *      |
| 3734 | Bielefeld               | 5000      | 1.051            | 1.0       | 1.0       | 3         | 3         | 0.31      | 5:56:40  | 0.0        | y    | y      |
| 3735 | Gütersloh               | 5000      | 1.063            | 1.0       | 1.0       | 3         | 3         | 0.31      | *        | *          | *    | *      |
| 3736 | Soest                   | 5000      | 1.056            | 1.0       | 1.0       | 3         | 3         | 0.31      | 1:10:45  | 0.0        | y    | y      |
| 3737 | Dortmund                | 5000      | 1.076            | 1.0       | 1.0       | 3         | 3         | 0.32      | 2:51:16  | 0.0        | y    | y      |
| 3738 | Kassel                  | 5000      | 1.074            | 1.0       | 1.0       | 3         | 3         | 0.29      | *        | *          | *    | *      |
| 3739 | Hannover                | 5000      | 1.151            | 1.0       | 1.0       | 3         | 3         | 0.29      | 10:27:53 | 0.0        | y    | y      |
| 3740 | Krefeld                 | 5000      | 1.102            | 1.0       | 1.0       | 3         | 3         | 0.32      | *        | *          | *    | *      |
| 3741 | Münster                 | 5000      | 1.064            | 1.0       | 1.0       | 3         | 3         | 0.37      | *        | *          | *    | *      |
| 3742 | Paderborn               | 5000      | 1.049            | 1.0       | 1.0       | 3         | 3         | 0.37      | 3:12:47  | 0.0        | y    | y      |
| 3743 | Detmold                 | 5000      | 1.052            | 1.0       | 1.0       | 3         | 3         | 0.38      | *        | *          | *    | *      |
| 3744 | Bielefeld               | 5000      | 1.051            | 1.0       | 1.0       | 3         | 3         | 0.39      | 4:07:36  | 0.0        | y    | y      |
| 3745 | Gütersloh               | 5000      | 1.063            | 1.0       | 1.0       | 3         | 3         | 0.36      | *        | *          | *    | *      |
| 3746 | Soest                   | 5000      | 1.056            | 1.0       | 1.0       | 3         | 3         | 0.36      | *        | *          | *    | *      |
| 3747 | Dortmund                | 5000      | 1.076            | 1.0       | 1.0       | 3         | 3         | 0.35      | *        | *          | *    | *      |
| 3748 | Kassel                  | 5000      | 1.074            | 1.0       | 1.0       | 3         | 3         | 0.36      | *        | *          | *    | *      |
| 3749 | Hannover                | 5000      | 1.151            | 1.0       | 1.0       | 3         | 3         | 0.37      | *        | *          | *    | *      |
| 3750 | Krefeld                 | 5000      | 1.102            | 1.0       | 1.0       | 3         | 3         | 0.38      | *        | *          | *    | *      |
| 3751 | Münster                 | 5000      | 1.064            | 1.0       | 1.0       | 4         | 4         | 0.27      | 22:48:08 | 0.0        | y    | y      |
| 3752 | Paderborn               | 5000      | 1.049            | 1.0       | 1.0       | 4         | 4         | 0.26      | 1:54:01  | 0.0        | y    | y      |
| 3753 | Detmold                 | 5000      | 1.051            | 1.0       | 1.0       | 4         | 4         | 0.27      | 1:48:31  | 0.0        | y    | y      |
| 3754 | Bielefeld               | 5000      | 1.051            | 1.0       | 1.0       | 4         | 4         | 0.24      | 12:45:30 | 0.0        | y    | y      |
| 3755 | Gütersloh               | 5000      | 1.063            | 1.0       | 1.0       | 4         | 4         | 0.29      | 1:37:18  | 0.0        | y    | y      |
| 3756 | Soest                   | 5000      | 1.056            | 1.0       | 1.0       | 4         | 4         | 0.27      | 0:44:08  | 0.0        | y    | y      |
| 3757 | Dortmund                | 5000      | 1.076            | 1.0       | 1.0       | 4         | 4         | 0.27      | 1:26:06  | 0.0        | y    | y      |
| 3758 | Kassel                  | 5000      | 1.074            | 1.0       | 1.0       | 4         | 4         | 0.25      | 1:07:56  | 0.0        | y    | y      |
| 3759 | Hannover                | 5000      | 1.152            | 1.0       | 1.0       | 4         | 4         | 0.27      | *        | *          | *    | *      |
| 3760 | Krefeld                 | 5000      | 1.102            | 1.0       | 1.0       | 4         | 4         | 0.31      | *        | *          | *    | *      |
| 3761 | Münster                 | 5000      | 1.064            | 1.0       | 1.0       | 4         | 4         | 0.31      | 7:46:49  | 0.0        | y    | y      |
| 3762 | Paderborn               | 5000      | 1.049            | 1.0       | 1.0       | 4         | 4         | 0.33      | 18:00:12 | 0.0        | y    | y      |
| 3763 | Detmold                 | 5000      | 1.052            | 1.0       | 1.0       | 4         | 4         | 0.32      | *        | *          | *    | *      |
| 3764 | Bielefeld               | 5000      | 1.052            | 1.0       | 1.0       | 4         | 4         | 0.32      | 27:10:17 | 0.0        | y    | y      |
| 3765 | Gütersloh               | 5000      | 1.063            | 1.0       | 1.0       | 4         | 4         | 0.33      | 27:53:44 | 0.27       | y    | y      |
| 3766 | Soest                   | 5000      | 1.056            | 1.0       | 1.0       | 4         | 4         | 0.32      | *        | *          | *    | *      |
| 3767 | Dortmund                | 5000      | 1.076            | 1.0       | 1.0       | 4         | 4         | 0.31      | 3:52:35  | 0.0        | y    | y      |
| 3768 | Kassel                  | 5000      | 1.074            | 1.0       | 1.0       | 4         | 4         | 0.3       | *        | *          | *    | *      |
| 3769 | Hannover                | 5000      | 1.151            | 1.0       | 1.0       | 4         | 4         | 0.31      | *        | *          | *    | *      |
| 3770 | Krefeld                 | 5000      | 1.102            | 1.0       | 1.0       | 4         | 4         | 0.33      | *        | *          | *    | *      |
| 3771 | Münster                 | 5000      | 1.064            | 1.0       | 1.0       | 4         | 4         | 0.39      | *        | *          | *    | *      |
| 3772 | Paderborn               | 5000      | 1.050            | 1.0       | 1.0       | 4         | 4         | 0.38      | *        | *          | *    | *      |
| 3773 | Detmold                 | 5000      | 1.052            | 1.0       | 1.0       | 4         | 4         | 0.39      | *        | *          | *    | *      |
| 3774 | Bielefeld               | 5000      | 1.051            | 1.0       | 1.0       | 4         | 4         | 0.4       | 13:44:47 | 0.0        | y    | y      |
| 3775 | Gütersloh               | 5000      | 1.063            | 1.0       | 1.0       | 4         | 4         | 0.37      | *        | *          | *    | *      |
| 3776 | Soest                   | 5000      | 1.056            | 1.0       | 1.0       | 4         | 4         | 0.37      | *        | *          | *    | *      |
| 3777 | Dortmund                | 5000      | 1.076            | 1.0       | 1.0       | 4         | 4         | 0.36      | *        | *          | *    | *      |
| 3778 | Kassel                  | 5000      | 1.074            | 1.0       | 1.0       | 4         | 4         | 0.37      | *        | *          | *    | *      |
| 3779 | Hannover                | 5000      | 1.151            | 1.0       | 1.0       | 4         | 4         | 0.38      | *        | *          | *    | *      |
| 3780 | Krefeld                 | 5000      | 1.102            | 1.0       | 1.0       | 4         | 4         | 0.39      | *        | *          | *    | *      |
| 3781 | Münster                 | 5000      | 1.066            | 0.83      | 1.26      | 2         | 2         | 0.22      | 1:07:12  | 0.0        | y    | y      |

| #    | Network characteristics |           |                  |           |           |           |           |           | Solution |      | Simulation |        |
|------|-------------------------|-----------|------------------|-----------|-----------|-----------|-----------|-----------|----------|------|------------|--------|
|      | <i>cn</i>               | <i>bu</i> | $\frac{n_l}{bu}$ | <i>lf</i> | <i>tr</i> | <i>lt</i> | <i>tt</i> | <i>as</i> | Time     | Gap  | Volt       | Ampere |
| 3782 | Paderborn               | 5000      | 1.052            | 0.83      | 1.26      | 2         | 2         | 0.2       | 2:10:35  | 0.0  | y          | y      |
| 3783 | Detmold                 | 5000      | 1.054            | 0.83      | 1.26      | 2         | 2         | 0.24      | 1:01:34  | 0.0  | y          | y      |
| 3784 | Bielefeld               | 5000      | 1.053            | 0.83      | 1.26      | 2         | 2         | 0.21      | 0:37:02  | 0.0  | y          | y      |
| 3785 | Gütersloh               | 5000      | 1.066            | 0.83      | 1.26      | 2         | 2         | 0.24      | 1:07:42  | 0.0  | y          | y      |
| 3786 | Soest                   | 5000      | 1.058            | 0.83      | 1.26      | 2         | 2         | 0.22      | 0:27:43  | 0.0  | y          | y      |
| 3787 | Dortmund                | 5000      | 1.078            | 0.83      | 1.26      | 2         | 2         | 0.22      | 1:12:01  | 0.0  | y          | y      |
| 3788 | Kassel                  | 5000      | 1.076            | 0.83      | 1.26      | 2         | 2         | 0.21      | 1:17:10  | 0.0  | y          | y      |
| 3789 | Hannover                | 5000      | 1.154            | 0.83      | 1.26      | 2         | 2         | 0.24      | 10:52:09 | 0.0  | y          | y      |
| 3790 | Krefeld                 | 5000      | 1.103            | 0.83      | 1.26      | 2         | 2         | 0.21      | 2:50:55  | 0.0  | y          | y      |
| 3791 | Münster                 | 5000      | 1.066            | 0.83      | 1.26      | 2         | 2         | 0.26      | 2:13:27  | 0.1  | y          | y      |
| 3792 | Paderborn               | 5000      | 1.052            | 0.83      | 1.26      | 2         | 2         | 0.28      | 1:18:19  | 0.0  | y          | y      |
| 3793 | Detmold                 | 5000      | 1.054            | 0.83      | 1.26      | 2         | 2         | 0.29      | 1:56:32  | 0.0  | y          | y      |
| 3794 | Bielefeld               | 5000      | 1.054            | 0.83      | 1.26      | 2         | 2         | 0.28      | 1:46:08  | 0.0  | y          | y      |
| 3795 | Gütersloh               | 5000      | 1.066            | 0.83      | 1.26      | 2         | 2         | 0.27      | 1:37:57  | 0.0  | y          | y      |
| 3796 | Soest                   | 5000      | 1.058            | 0.83      | 1.26      | 2         | 2         | 0.27      | 2:02:01  | 0.0  | y          | y      |
| 3797 | Dortmund                | 5000      | 1.078            | 0.83      | 1.26      | 2         | 2         | 0.29      | 2:34:28  | 0.0  | y          | y      |
| 3798 | Kassel                  | 5000      | 1.076            | 0.83      | 1.26      | 2         | 2         | 0.25      | 3:16:31  | 0.0  | y          | y      |
| 3799 | Hannover                | 5000      | 1.153            | 0.83      | 1.26      | 2         | 2         | 0.29      | 4:53:18  | 0.45 | y          | y      |
| 3800 | Krefeld                 | 5000      | 1.103            | 0.83      | 1.26      | 2         | 2         | 0.27      | 3:11:10  | 0.0  | y          | y      |
| 3801 | Münster                 | 5000      | 1.066            | 0.83      | 1.26      | 2         | 2         | 0.35      | 5:41:40  | 0.0  | y          | y      |
| 3802 | Paderborn               | 5000      | 1.052            | 0.83      | 1.26      | 2         | 2         | 0.33      | 4:06:04  | 0.0  | y          | y      |
| 3803 | Detmold                 | 5000      | 1.054            | 0.83      | 1.26      | 2         | 2         | 0.36      | 5:00:38  | 0.0  | y          | y      |
| 3804 | Bielefeld               | 5000      | 1.054            | 0.83      | 1.26      | 2         | 2         | 0.36      | 4:21:04  | 0.0  | y          | y      |
| 3805 | Gütersloh               | 5000      | 1.066            | 0.83      | 1.26      | 2         | 2         | 0.35      | *        | *    | *          | *      |
| 3806 | Soest                   | 5000      | 1.058            | 0.83      | 1.26      | 2         | 2         | 0.34      | 0:57:44  | 0.0  | y          | y      |
| 3807 | Dortmund                | 5000      | 1.078            | 0.83      | 1.26      | 2         | 2         | 0.34      | 3:37:37  | 0.0  | y          | y      |
| 3808 | Kassel                  | 5000      | 1.076            | 0.83      | 1.26      | 2         | 2         | 0.34      | 4:49:13  | 0.0  | y          | y      |
| 3809 | Hannover                | 5000      | 1.154            | 0.83      | 1.26      | 2         | 2         | 0.36      | 6:45:41  | 0.0  | y          | y      |
| 3810 | Krefeld                 | 5000      | 1.103            | 0.83      | 1.26      | 2         | 2         | 0.35      | *        | *    | *          | *      |
| 3811 | Münster                 | 5000      | 1.066            | 0.83      | 1.26      | 3         | 3         | 0.24      | 1:29:56  | 0.0  | y          | y      |
| 3812 | Paderborn               | 5000      | 1.052            | 0.83      | 1.26      | 3         | 3         | 0.21      | 2:02:37  | 0.0  | y          | y      |
| 3813 | Detmold                 | 5000      | 1.055            | 0.83      | 1.26      | 3         | 3         | 0.26      | 1:46:07  | 0.0  | y          | y      |
| 3814 | Bielefeld               | 5000      | 1.053            | 0.83      | 1.26      | 3         | 3         | 0.24      | 2:26:37  | 0.0  | y          | y      |
| 3815 | Gütersloh               | 5000      | 1.066            | 0.83      | 1.26      | 3         | 3         | 0.22      | 1:25:33  | 0.0  | y          | y      |
| 3816 | Soest                   | 5000      | 1.058            | 0.83      | 1.26      | 3         | 3         | 0.25      | 0:51:30  | 0.0  | y          | y      |
| 3817 | Dortmund                | 5000      | 1.077            | 0.83      | 1.26      | 3         | 3         | 0.24      | 3:39:43  | 0.0  | y          | y      |
| 3818 | Kassel                  | 5000      | 1.076            | 0.83      | 1.26      | 3         | 3         | 0.24      | 2:53:20  | 0.0  | y          | y      |
| 3819 | Hannover                | 5000      | 1.154            | 0.83      | 1.26      | 3         | 3         | 0.27      | 2:31:52  | 0.0  | y          | y      |
| 3820 | Krefeld                 | 5000      | 1.104            | 0.83      | 1.26      | 3         | 3         | 0.23      | 2:15:24  | 0.0  | y          | y      |
| 3821 | Münster                 | 5000      | 1.066            | 0.83      | 1.26      | 3         | 3         | 0.28      | 2:45:21  | 0.0  | y          | y      |
| 3822 | Paderborn               | 5000      | 1.052            | 0.83      | 1.26      | 3         | 3         | 0.29      | 6:19:37  | 0.0  | y          | y      |
| 3823 | Detmold                 | 5000      | 1.054            | 0.83      | 1.26      | 3         | 3         | 0.3       | 2:44:38  | 0.0  | y          | y      |
| 3824 | Bielefeld               | 5000      | 1.053            | 0.83      | 1.26      | 3         | 3         | 0.3       | 1:04:34  | 0.0  | y          | y      |
| 3825 | Gütersloh               | 5000      | 1.066            | 0.83      | 1.26      | 3         | 3         | 0.28      | 2:15:52  | 0.0  | y          | y      |
| 3826 | Soest                   | 5000      | 1.058            | 0.83      | 1.26      | 3         | 3         | 0.28      | 1:33:40  | 0.0  | y          | y      |
| 3827 | Dortmund                | 5000      | 1.077            | 0.83      | 1.26      | 3         | 3         | 0.28      | 2:29:01  | 0.0  | y          | y      |
| 3828 | Kassel                  | 5000      | 1.077            | 0.83      | 1.26      | 3         | 3         | 0.29      | 4:13:13  | 0.0  | y          | y      |
| 3829 | Hannover                | 5000      | 1.154            | 0.83      | 1.26      | 3         | 3         | 0.3       | 8:38:05  | 0.08 | y          | y      |
| 3830 | Krefeld                 | 5000      | 1.103            | 0.83      | 1.26      | 3         | 3         | 0.32      | *        | *    | *          | *      |
| 3831 | Münster                 | 5000      | 1.066            | 0.83      | 1.26      | 3         | 3         | 0.35      | 12:49:54 | 0.0  | y          | y      |
| 3832 | Paderborn               | 5000      | 1.052            | 0.83      | 1.26      | 3         | 3         | 0.34      | *        | *    | *          | *      |
| 3833 | Detmold                 | 5000      | 1.054            | 0.83      | 1.26      | 3         | 3         | 0.37      | 2:06:41  | 0.0  | y          | y      |

| #    | Network characteristics |           |                  |           |           |           |           | Solution  |          | Simulation |      |        |
|------|-------------------------|-----------|------------------|-----------|-----------|-----------|-----------|-----------|----------|------------|------|--------|
|      | <i>cn</i>               | <i>bu</i> | $\frac{n_l}{bu}$ | <i>lf</i> | <i>tr</i> | <i>lt</i> | <i>tt</i> | <i>as</i> | Time     | Gap        | Volt | Ampere |
| 3834 | Bielefeld               | 5000      | 1.053            | 0.83      | 1.26      | 3         | 3         | 0.37      | 30:50:04 | 0.0        | y    | y      |
| 3835 | Gütersloh               | 5000      | 1.066            | 0.83      | 1.26      | 3         | 3         | 0.36      | 3:45:40  | 0.0        | y    | y      |
| 3836 | Soest                   | 5000      | 1.058            | 0.83      | 1.26      | 3         | 3         | 0.36      | 1:42:26  | 0.0        | y    | y      |
| 3837 | Dortmund                | 5000      | 1.078            | 0.83      | 1.26      | 3         | 3         | 0.35      | *        | *          | *    | *      |
| 3838 | Kassel                  | 5000      | 1.076            | 0.83      | 1.26      | 3         | 3         | 0.36      | *        | *          | *    | *      |
| 3839 | Hannover                | 5000      | 1.154            | 0.83      | 1.26      | 3         | 3         | 0.36      | *        | *          | *    | *      |
| 3840 | Krefeld                 | 5000      | 1.103            | 0.83      | 1.26      | 3         | 3         | 0.36      | *        | *          | *    | *      |
| 3841 | Münster                 | 5000      | 1.066            | 0.83      | 1.26      | 4         | 4         | 0.26      | *        | *          | *    | *      |
| 3842 | Paderborn               | 5000      | 1.052            | 0.83      | 1.26      | 4         | 4         | 0.23      | 2:38:08  | 0.0        | y    | y      |
| 3843 | Detmold                 | 5000      | 1.054            | 0.83      | 1.26      | 4         | 4         | 0.28      | 2:00:30  | 0.0        | y    | y      |
| 3844 | Bielefeld               | 5000      | 1.054            | 0.83      | 1.26      | 4         | 4         | 0.26      | 2:03:34  | 0.0        | y    | y      |
| 3845 | Gütersloh               | 5000      | 1.066            | 0.83      | 1.26      | 4         | 4         | 0.23      | 1:56:39  | 0.0        | y    | y      |
| 3846 | Soest                   | 5000      | 1.058            | 0.83      | 1.26      | 4         | 4         | 0.25      | 2:38:47  | 0.0        | y    | y      |
| 3847 | Dortmund                | 5000      | 1.077            | 0.83      | 1.26      | 4         | 4         | 0.25      | 3:37:00  | 0.0        | y    | y      |
| 3848 | Kassel                  | 5000      | 1.076            | 0.83      | 1.26      | 4         | 4         | 0.26      | 2:36:36  | 0.0        | y    | y      |
| 3849 | Hannover                | 5000      | 1.154            | 0.83      | 1.26      | 4         | 4         | 0.29      | 3:18:42  | 0.0        | y    | y      |
| 3850 | Krefeld                 | 5000      | 1.103            | 0.83      | 1.26      | 4         | 4         | 0.25      | 4:33:54  | 0.0        | y    | y      |
| 3851 | Münster                 | 5000      | 1.066            | 0.83      | 1.26      | 4         | 4         | 0.31      | 1:25:04  | 0.0        | y    | y      |
| 3852 | Paderborn               | 5000      | 1.052            | 0.83      | 1.26      | 4         | 4         | 0.3       | 4:36:49  | 0.0        | y    | y      |
| 3853 | Detmold                 | 5000      | 1.054            | 0.83      | 1.26      | 4         | 4         | 0.32      | 7:10:19  | 0.0        | y    | y      |
| 3854 | Bielefeld               | 5000      | 1.054            | 0.83      | 1.26      | 4         | 4         | 0.3       | 2:46:05  | 0.0        | y    | y      |
| 3855 | Gütersloh               | 5000      | 1.066            | 0.83      | 1.26      | 4         | 4         | 0.29      | 7:12:20  | 0.0        | y    | y      |
| 3856 | Soest                   | 5000      | 1.058            | 0.83      | 1.26      | 4         | 4         | 0.29      | 1:36:04  | 0.0        | y    | y      |
| 3857 | Dortmund                | 5000      | 1.078            | 0.83      | 1.26      | 4         | 4         | 0.32      | *        | *          | *    | *      |
| 3858 | Kassel                  | 5000      | 1.076            | 0.83      | 1.26      | 4         | 4         | 0.28      | 48:00:02 | 0.0        | y    | y      |
| 3859 | Hannover                | 5000      | 1.153            | 0.83      | 1.26      | 4         | 4         | 0.32      | *        | *          | *    | *      |
| 3860 | Krefeld                 | 5000      | 1.103            | 0.83      | 1.26      | 4         | 4         | 0.29      | 8:22:05  | 0.0        | y    | y      |
| 3861 | Münster                 | 5000      | 1.066            | 0.83      | 1.26      | 4         | 4         | 0.36      | 6:26:39  | 0.0        | y    | y      |
| 3862 | Paderborn               | 5000      | 1.052            | 0.83      | 1.26      | 4         | 4         | 0.35      | *        | *          | *    | *      |
| 3863 | Detmold                 | 5000      | 1.054            | 0.83      | 1.26      | 4         | 4         | 0.39      | 7:09:10  | 0.0        | y    | y      |
| 3864 | Bielefeld               | 5000      | 1.053            | 0.83      | 1.26      | 4         | 4         | 0.38      | 9:45:18  | 0.09       | y    | y      |
| 3865 | Gütersloh               | 5000      | 1.066            | 0.83      | 1.26      | 4         | 4         | 0.37      | 8:18:18  | 0.0        | y    | y      |
| 3866 | Soest                   | 5000      | 1.058            | 0.83      | 1.26      | 4         | 4         | 0.37      | 3:18:23  | 0.0        | y    | y      |
| 3867 | Dortmund                | 5000      | 1.078            | 0.83      | 1.26      | 4         | 4         | 0.36      | *        | *          | *    | *      |
| 3868 | Kassel                  | 5000      | 1.076            | 0.83      | 1.26      | 4         | 4         | 0.36      | *        | *          | *    | *      |
| 3869 | Hannover                | 5000      | 1.154            | 0.83      | 1.26      | 4         | 4         | 0.38      | 19:30:11 | 0.3        | y    | y      |
| 3870 | Krefeld                 | 5000      | 1.103            | 0.83      | 1.26      | 4         | 4         | 0.39      | *        | *          | *    | *      |
| 3871 | Münster                 | 5000      | 1.066            | 1.34      | 1.26      | 2         | 2         | 0.23      | 1:11:00  | 0.0        | y    | y      |
| 3872 | Paderborn               | 5000      | 1.052            | 1.34      | 1.26      | 2         | 2         | 0.24      | 1:40:28  | 0.0        | y    | y      |
| 3873 | Detmold                 | 5000      | 1.054            | 1.34      | 1.26      | 2         | 2         | 0.24      | 0:50:48  | 0.0        | y    | y      |
| 3874 | Bielefeld               | 5000      | 1.053            | 1.34      | 1.26      | 2         | 2         | 0.21      | 0:25:28  | 0.0        | y    | y      |
| 3875 | Gütersloh               | 5000      | 1.066            | 1.34      | 1.26      | 2         | 2         | 0.2       | 1:12:34  | 0.0        | y    | y      |
| 3876 | Soest                   | 5000      | 1.058            | 1.34      | 1.26      | 2         | 2         | 0.22      | 0:23:54  | 0.0        | y    | y      |
| 3877 | Dortmund                | 5000      | 1.077            | 1.34      | 1.26      | 2         | 2         | 0.22      | 1:17:37  | 0.0        | y    | y      |
| 3878 | Kassel                  | 5000      | 1.076            | 1.34      | 1.26      | 2         | 2         | 0.21      | 1:50:16  | 0.0        | y    | y      |
| 3879 | Hannover                | 5000      | 1.154            | 1.34      | 1.26      | 2         | 2         | 0.23      | 2:03:13  | 0.0        | y    | y      |
| 3880 | Krefeld                 | 5000      | 1.104            | 1.34      | 1.26      | 2         | 2         | 0.2       | 8:53:25  | 0.0        | y    | y      |
| 3881 | Münster                 | 5000      | 1.066            | 1.34      | 1.26      | 2         | 2         | 0.28      | 1:02:17  | 0.0        | y    | y      |
| 3882 | Paderborn               | 5000      | 1.052            | 1.34      | 1.26      | 2         | 2         | 0.28      | 2:16:55  | 0.0        | y    | y      |
| 3883 | Detmold                 | 5000      | 1.054            | 1.34      | 1.26      | 2         | 2         | 0.29      | 1:48:17  | 0.0        | y    | y      |
| 3884 | Bielefeld               | 5000      | 1.054            | 1.34      | 1.26      | 2         | 2         | 0.29      | 3:56:47  | 0.08       | y    | y      |
| 3885 | Gütersloh               | 5000      | 1.066            | 1.34      | 1.26      | 2         | 2         | 0.27      | 1:57:57  | 0.0        | y    | y      |

| #    | Network characteristics |           |                  |           |           |           |           |           | Solution |      | Simulation |        |
|------|-------------------------|-----------|------------------|-----------|-----------|-----------|-----------|-----------|----------|------|------------|--------|
|      | <i>cn</i>               | <i>bu</i> | $\frac{n_l}{bu}$ | <i>lf</i> | <i>tr</i> | <i>lt</i> | <i>tt</i> | <i>as</i> | Time     | Gap  | Volt       | Ampere |
| 3886 | Soest                   | 5000      | 1.058            | 1.34      | 1.26      | 2         | 2         | 0.27      | 1:04:31  | 0.0  | y          | y      |
| 3887 | Dortmund                | 5000      | 1.078            | 1.34      | 1.26      | 2         | 2         | 0.26      | 1:23:39  | 0.0  | y          | y      |
| 3888 | Kassel                  | 5000      | 1.076            | 1.34      | 1.26      | 2         | 2         | 0.28      | 14:11:51 | 0.0  | y          | y      |
| 3889 | Hannover                | 5000      | 1.153            | 1.34      | 1.26      | 2         | 2         | 0.29      | 14:10:41 | 0.0  | y          | y      |
| 3890 | Krefeld                 | 5000      | 1.103            | 1.34      | 1.26      | 2         | 2         | 0.31      | 4:00:08  | 0.0  | y          | y      |
| 3891 | Münster                 | 5000      | 1.066            | 1.34      | 1.26      | 2         | 2         | 0.35      | 7:19:18  | 0.1  | y          | y      |
| 3892 | Paderborn               | 5000      | 1.052            | 1.34      | 1.26      | 2         | 2         | 0.35      | 2:16:40  | 0.0  | y          | y      |
| 3893 | Detmold                 | 5000      | 1.054            | 1.34      | 1.26      | 2         | 2         | 0.36      | 4:49:13  | 0.0  | y          | y      |
| 3894 | Bielefeld               | 5000      | 1.053            | 1.34      | 1.26      | 2         | 2         | 0.36      | 2:33:32  | 0.0  | y          | y      |
| 3895 | Gütersloh               | 5000      | 1.066            | 1.34      | 1.26      | 2         | 2         | 0.35      | 3:05:14  | 0.0  | y          | y      |
| 3896 | Soest                   | 5000      | 1.058            | 1.34      | 1.26      | 2         | 2         | 0.34      | 1:57:56  | 0.0  | y          | y      |
| 3897 | Dortmund                | 5000      | 1.078            | 1.34      | 1.26      | 2         | 2         | 0.36      | 12:35:11 | 0.0  | y          | y      |
| 3898 | Kassel                  | 5000      | 1.076            | 1.34      | 1.26      | 2         | 2         | 0.35      | *        | *    | *          | *      |
| 3899 | Hannover                | 5000      | 1.154            | 1.34      | 1.26      | 2         | 2         | 0.36      | 16:00:17 | 0.26 | y          | y      |
| 3900 | Krefeld                 | 5000      | 1.103            | 1.34      | 1.26      | 2         | 2         | 0.35      | *        | *    | *          | *      |
| 3901 | Münster                 | 5000      | 1.066            | 1.34      | 1.26      | 3         | 3         | 0.25      | 0:45:39  | 0.0  | y          | y      |
| 3902 | Paderborn               | 5000      | 1.052            | 1.34      | 1.26      | 3         | 3         | 0.25      | 2:27:59  | 0.15 | y          | y      |
| 3903 | Detmold                 | 5000      | 1.054            | 1.34      | 1.26      | 3         | 3         | 0.26      | 1:46:50  | 0.0  | y          | y      |
| 3904 | Bielefeld               | 5000      | 1.053            | 1.34      | 1.26      | 3         | 3         | 0.24      | 0:26:27  | 0.0  | y          | y      |
| 3905 | Gütersloh               | 5000      | 1.066            | 1.34      | 1.26      | 3         | 3         | 0.22      | 1:20:39  | 0.0  | y          | y      |
| 3906 | Soest                   | 5000      | 1.058            | 1.34      | 1.26      | 3         | 3         | 0.23      | 0:46:36  | 0.34 | y          | y      |
| 3907 | Dortmund                | 5000      | 1.078            | 1.34      | 1.26      | 3         | 3         | 0.28      | 1:37:47  | 0.0  | y          | y      |
| 3908 | Kassel                  | 5000      | 1.076            | 1.34      | 1.26      | 3         | 3         | 0.24      | 1:37:15  | 0.0  | y          | y      |
| 3909 | Hannover                | 5000      | 1.154            | 1.34      | 1.26      | 3         | 3         | 0.26      | 2:56:29  | 0.0  | y          | y      |
| 3910 | Krefeld                 | 5000      | 1.103            | 1.34      | 1.26      | 3         | 3         | 0.23      | 4:23:11  | 0.0  | y          | y      |
| 3911 | Münster                 | 5000      | 1.066            | 1.34      | 1.26      | 3         | 3         | 0.3       | 2:11:17  | 0.0  | y          | y      |
| 3912 | Paderborn               | 5000      | 1.052            | 1.34      | 1.26      | 3         | 3         | 0.3       | 1:14:19  | 0.0  | y          | y      |
| 3913 | Detmold                 | 5000      | 1.054            | 1.34      | 1.26      | 3         | 3         | 0.3       | 5:02:51  | 0.0  | y          | y      |
| 3914 | Bielefeld               | 5000      | 1.053            | 1.34      | 1.26      | 3         | 3         | 0.3       | 3:50:06  | 0.0  | y          | y      |
| 3915 | Gütersloh               | 5000      | 1.066            | 1.34      | 1.26      | 3         | 3         | 0.28      | 0:49:01  | 0.0  | y          | y      |
| 3916 | Soest                   | 5000      | 1.058            | 1.34      | 1.26      | 3         | 3         | 0.28      | 0:58:41  | 0.0  | y          | y      |
| 3917 | Dortmund                | 5000      | 1.078            | 1.34      | 1.26      | 3         | 3         | 0.27      | 5:46:36  | 0.0  | y          | y      |
| 3918 | Kassel                  | 5000      | 1.076            | 1.34      | 1.26      | 3         | 3         | 0.27      | 2:19:07  | 0.0  | y          | y      |
| 3919 | Hannover                | 5000      | 1.154            | 1.34      | 1.26      | 3         | 3         | 0.3       | 5:10:38  | 0.0  | y          | y      |
| 3920 | Krefeld                 | 5000      | 1.103            | 1.34      | 1.26      | 3         | 3         | 0.28      | 14:44:48 | 0.0  | y          | y      |
| 3921 | Münster                 | 5000      | 1.066            | 1.34      | 1.26      | 3         | 3         | 0.35      | 11:15:44 | 0.0  | y          | y      |
| 3922 | Paderborn               | 5000      | 1.052            | 1.34      | 1.26      | 3         | 3         | 0.34      | *        | *    | *          | *      |
| 3923 | Detmold                 | 5000      | 1.054            | 1.34      | 1.26      | 3         | 3         | 0.37      | *        | *    | *          | *      |
| 3924 | Bielefeld               | 5000      | 1.053            | 1.34      | 1.26      | 3         | 3         | 0.37      | 2:30:23  | 0.0  | y          | y      |
| 3925 | Gütersloh               | 5000      | 1.066            | 1.34      | 1.26      | 3         | 3         | 0.36      | *        | *    | *          | *      |
| 3926 | Soest                   | 5000      | 1.058            | 1.34      | 1.26      | 3         | 3         | 0.35      | 16:35:55 | 0.47 | y          | y      |
| 3927 | Dortmund                | 5000      | 1.078            | 1.34      | 1.26      | 3         | 3         | 0.37      | 4:31:13  | 0.0  | y          | y      |
| 3928 | Kassel                  | 5000      | 1.076            | 1.34      | 1.26      | 3         | 3         | 0.36      | *        | *    | *          | *      |
| 3929 | Hannover                | 5000      | 1.154            | 1.34      | 1.26      | 3         | 3         | 0.37      | 20:19:12 | 0.34 | y          | y      |
| 3930 | Krefeld                 | 5000      | 1.103            | 1.34      | 1.26      | 3         | 3         | 0.36      | *        | *    | *          | *      |
| 3931 | Münster                 | 5000      | 1.066            | 1.34      | 1.26      | 4         | 4         | 0.27      | 0:55:18  | 0.0  | y          | y      |
| 3932 | Paderborn               | 5000      | 1.052            | 1.34      | 1.26      | 4         | 4         | 0.23      | 1:57:39  | 0.0  | y          | y      |
| 3933 | Detmold                 | 5000      | 1.054            | 1.34      | 1.26      | 4         | 4         | 0.28      | 2:43:25  | 0.0  | y          | y      |
| 3934 | Bielefeld               | 5000      | 1.053            | 1.34      | 1.26      | 4         | 4         | 0.26      | 0:41:17  | 0.0  | y          | y      |
| 3935 | Gütersloh               | 5000      | 1.066            | 1.34      | 1.26      | 4         | 4         | 0.23      | 2:19:51  | 0.0  | y          | y      |
| 3936 | Soest                   | 5000      | 1.058            | 1.34      | 1.26      | 4         | 4         | 0.25      | 1:25:54  | 0.0  | y          | y      |
| 3937 | Dortmund                | 5000      | 1.078            | 1.34      | 1.26      | 4         | 4         | 0.3       | 2:56:29  | 0.0  | y          | y      |

| #    | Network characteristics |           |                 |           |           |           |           | Solution  |          | Simulation |      |        |
|------|-------------------------|-----------|-----------------|-----------|-----------|-----------|-----------|-----------|----------|------------|------|--------|
|      | <i>cn</i>               | <i>bu</i> | $\frac{nl}{bu}$ | <i>lf</i> | <i>tr</i> | <i>lt</i> | <i>tt</i> | <i>as</i> | Time     | Gap        | Volt | Ampere |
| 3938 | Kassel                  | 5000      | 1.076           | 1.34      | 1.26      | 4         | 4         | 0.26      | 1:47:43  | 0.0        | y    | y      |
| 3939 | Hannover                | 5000      | 1.154           | 1.34      | 1.26      | 4         | 4         | 0.29      | 5:02:57  | 0.0        | y    | y      |
| 3940 | Krefeld                 | 5000      | 1.103           | 1.34      | 1.26      | 4         | 4         | 0.25      | *        | *          | *    | *      |
| 3941 | Münster                 | 5000      | 1.066           | 1.34      | 1.26      | 4         | 4         | 0.29      | 8:36:15  | 0.1        | y    | y      |
| 3942 | Paderborn               | 5000      | 1.052           | 1.34      | 1.26      | 4         | 4         | 0.3       | 33:04:29 | 0.0        | y    | y      |
| 3943 | Detmold                 | 5000      | 1.054           | 1.34      | 1.26      | 4         | 4         | 0.32      | 1:21:40  | 0.0        | y    | y      |
| 3944 | Bielefeld               | 5000      | 1.053           | 1.34      | 1.26      | 4         | 4         | 0.31      | 6:01:50  | 0.0        | y    | y      |
| 3945 | Gütersloh               | 5000      | 1.066           | 1.34      | 1.26      | 4         | 4         | 0.29      | 1:31:20  | 0.1        | y    | y      |
| 3946 | Soest                   | 5000      | 1.058           | 1.34      | 1.26      | 4         | 4         | 0.29      | 3:16:43  | 0.0        | y    | y      |
| 3947 | Dortmund                | 5000      | 1.078           | 1.34      | 1.26      | 4         | 4         | 0.28      | *        | *          | *    | *      |
| 3948 | Kassel                  | 5000      | 1.076           | 1.34      | 1.26      | 4         | 4         | 0.28      | 4:19:04  | 0.0        | y    | y      |
| 3949 | Hannover                | 5000      | 1.154           | 1.34      | 1.26      | 4         | 4         | 0.31      | *        | *          | *    | *      |
| 3950 | Krefeld                 | 5000      | 1.104           | 1.34      | 1.26      | 4         | 4         | 0.31      | *        | *          | *    | *      |
| 3951 | Münster                 | 5000      | 1.066           | 1.34      | 1.26      | 4         | 4         | 0.39      | *        | *          | *    | *      |
| 3952 | Paderborn               | 5000      | 1.052           | 1.34      | 1.26      | 4         | 4         | 0.35      | *        | *          | *    | *      |
| 3953 | Detmold                 | 5000      | 1.054           | 1.34      | 1.26      | 4         | 4         | 0.39      | *        | *          | *    | *      |
| 3954 | Bielefeld               | 5000      | 1.053           | 1.34      | 1.26      | 4         | 4         | 0.38      | 4:54:32  | 0.0        | y    | y      |
| 3955 | Gütersloh               | 5000      | 1.066           | 1.34      | 1.26      | 4         | 4         | 0.37      | *        | *          | *    | *      |
| 3956 | Soest                   | 5000      | 1.058           | 1.34      | 1.26      | 4         | 4         | 0.37      | 7:49:31  | 0.0        | y    | y      |
| 3957 | Dortmund                | 5000      | 1.078           | 1.34      | 1.26      | 4         | 4         | 0.38      | *        | *          | *    | *      |
| 3958 | Kassel                  | 5000      | 1.076           | 1.34      | 1.26      | 4         | 4         | 0.37      | *        | *          | *    | *      |
| 3959 | Hannover                | 5000      | 1.154           | 1.34      | 1.26      | 4         | 4         | 0.38      | 17:22:28 | 0.0        | y    | y      |
| 3960 | Krefeld                 | 5000      | 1.103           | 1.34      | 1.26      | 4         | 4         | 0.37      | *        | *          | *    | *      |
| 3961 | Münster                 | 5000      | 1.066           | 1.0       | 1.26      | 2         | 2         | 0.23      | 1:12:37  | 0.0        | y    | y      |
| 3962 | Paderborn               | 5000      | 1.052           | 1.0       | 1.26      | 2         | 2         | 0.2       | 1:25:39  | 0.0        | y    | y      |
| 3963 | Detmold                 | 5000      | 1.054           | 1.0       | 1.26      | 2         | 2         | 0.24      | 1:13:08  | 0.0        | y    | y      |
| 3964 | Bielefeld               | 5000      | 1.053           | 1.0       | 1.26      | 2         | 2         | 0.21      | 0:21:18  | 0.0        | y    | y      |
| 3965 | Gütersloh               | 5000      | 1.066           | 1.0       | 1.26      | 2         | 2         | 0.2       | 1:30:43  | 0.0        | y    | y      |
| 3966 | Soest                   | 5000      | 1.058           | 1.0       | 1.26      | 2         | 2         | 0.22      | 1:00:17  | 0.0        | y    | y      |
| 3967 | Dortmund                | 5000      | 1.078           | 1.0       | 1.26      | 2         | 2         | 0.22      | 1:07:43  | 0.0        | y    | y      |
| 3968 | Kassel                  | 5000      | 1.076           | 1.0       | 1.26      | 2         | 2         | 0.21      | 1:33:14  | 0.0        | y    | y      |
| 3969 | Hannover                | 5000      | 1.154           | 1.0       | 1.26      | 2         | 2         | 0.24      | 3:32:44  | 0.0        | y    | y      |
| 3970 | Krefeld                 | 5000      | 1.103           | 1.0       | 1.26      | 2         | 2         | 0.21      | 1:53:01  | 0.0        | y    | y      |
| 3971 | Münster                 | 5000      | 1.066           | 1.0       | 1.26      | 2         | 2         | 0.28      | 1:06:03  | 0.0        | y    | y      |
| 3972 | Paderborn               | 5000      | 1.052           | 1.0       | 1.26      | 2         | 2         | 0.28      | 5:01:04  | 0.0        | y    | y      |
| 3973 | Detmold                 | 5000      | 1.054           | 1.0       | 1.26      | 2         | 2         | 0.29      | 1:16:32  | 0.0        | y    | y      |
| 3974 | Bielefeld               | 5000      | 1.053           | 1.0       | 1.26      | 2         | 2         | 0.29      | 1:35:50  | 0.0        | y    | y      |
| 3975 | Gütersloh               | 5000      | 1.066           | 1.0       | 1.26      | 2         | 2         | 0.27      | 1:40:45  | 0.0        | y    | y      |
| 3976 | Soest                   | 5000      | 1.058           | 1.0       | 1.26      | 2         | 2         | 0.26      | 0:54:01  | 0.0        | y    | y      |
| 3977 | Dortmund                | 5000      | 1.078           | 1.0       | 1.26      | 2         | 2         | 0.29      | 6:43:56  | 0.0        | y    | y      |
| 3978 | Kassel                  | 5000      | 1.076           | 1.0       | 1.26      | 2         | 2         | 0.25      | 1:35:49  | 0.0        | y    | y      |
| 3979 | Hannover                | 5000      | 1.154           | 1.0       | 1.26      | 2         | 2         | 0.29      | 3:19:37  | 0.0        | y    | y      |
| 3980 | Krefeld                 | 5000      | 1.103           | 1.0       | 1.26      | 2         | 2         | 0.27      | 2:58:22  | 0.0        | y    | y      |
| 3981 | Münster                 | 5000      | 1.066           | 1.0       | 1.26      | 2         | 2         | 0.35      | 2:34:34  | 0.0        | y    | y      |
| 3982 | Paderborn               | 5000      | 1.052           | 1.0       | 1.26      | 2         | 2         | 0.35      | 5:03:03  | 0.0        | y    | y      |
| 3983 | Detmold                 | 5000      | 1.054           | 1.0       | 1.26      | 2         | 2         | 0.36      | 9:44:45  | 0.11       | y    | y      |
| 3984 | Bielefeld               | 5000      | 1.053           | 1.0       | 1.26      | 2         | 2         | 0.36      | 1:43:00  | 0.0        | y    | y      |
| 3985 | Gütersloh               | 5000      | 1.066           | 1.0       | 1.26      | 2         | 2         | 0.35      | 3:49:35  | 0.0        | y    | y      |
| 3986 | Soest                   | 5000      | 1.058           | 1.0       | 1.26      | 2         | 2         | 0.35      | 30:46:31 | 0.26       | y    | y      |
| 3987 | Dortmund                | 5000      | 1.078           | 1.0       | 1.26      | 2         | 2         | 0.36      | 10:26:15 | 0.0        | y    | y      |
| 3988 | Kassel                  | 5000      | 1.076           | 1.0       | 1.26      | 2         | 2         | 0.35      | 4:17:50  | 0.0        | y    | y      |
| 3989 | Hannover                | 5000      | 1.154           | 1.0       | 1.26      | 2         | 2         | 0.35      | *        | *          | *    | *      |

| #    | Network characteristics |           |                  |           |           |           |           |           | Solution |      | Simulation |        |
|------|-------------------------|-----------|------------------|-----------|-----------|-----------|-----------|-----------|----------|------|------------|--------|
|      | <i>cn</i>               | <i>bu</i> | $\frac{n_l}{bu}$ | <i>lf</i> | <i>tr</i> | <i>lt</i> | <i>tt</i> | <i>as</i> | Time     | Gap  | Volt       | Ampere |
| 3990 | Krefeld                 | 5000      | 1.103            | 1.0       | 1.26      | 2         | 2         | 0.35      | 7:48:25  | 0.2  | y          | y      |
| 3991 | Münster                 | 5000      | 1.066            | 1.0       | 1.26      | 3         | 3         | 0.24      | 0:41:17  | 0.0  | y          | y      |
| 3992 | Paderborn               | 5000      | 1.052            | 1.0       | 1.26      | 3         | 3         | 0.21      | 3:59:40  | 0.0  | y          | y      |
| 3993 | Detmold                 | 5000      | 1.054            | 1.0       | 1.26      | 3         | 3         | 0.26      | 1:16:32  | 0.0  | y          | y      |
| 3994 | Bielefeld               | 5000      | 1.054            | 1.0       | 1.26      | 3         | 3         | 0.24      | 0:35:18  | 0.0  | y          | y      |
| 3995 | Gütersloh               | 5000      | 1.066            | 1.0       | 1.26      | 3         | 3         | 0.22      | 2:22:03  | 0.0  | y          | y      |
| 3996 | Soest                   | 5000      | 1.058            | 1.0       | 1.26      | 3         | 3         | 0.25      | 0:53:43  | 0.0  | y          | y      |
| 3997 | Dortmund                | 5000      | 1.078            | 1.0       | 1.26      | 3         | 3         | 0.28      | 2:23:29  | 0.0  | y          | y      |
| 3998 | Kassel                  | 5000      | 1.076            | 1.0       | 1.26      | 3         | 3         | 0.24      | 2:50:42  | 0.0  | y          | y      |
| 3999 | Hannover                | 5000      | 1.154            | 1.0       | 1.26      | 3         | 3         | 0.26      | 2:18:20  | 0.0  | y          | y      |
| 4000 | Krefeld                 | 5000      | 1.103            | 1.0       | 1.26      | 3         | 3         | 0.23      | 3:30:49  | 0.0  | y          | y      |
| 4001 | Münster                 | 5000      | 1.066            | 1.0       | 1.26      | 3         | 3         | 0.3       | 1:53:36  | 0.0  | y          | y      |
| 4002 | Paderborn               | 5000      | 1.052            | 1.0       | 1.26      | 3         | 3         | 0.29      | 4:42:41  | 0.0  | y          | y      |
| 4003 | Detmold                 | 5000      | 1.055            | 1.0       | 1.26      | 3         | 3         | 0.3       | 5:45:53  | 0.18 | y          | y      |
| 4004 | Bielefeld               | 5000      | 1.053            | 1.0       | 1.26      | 3         | 3         | 0.3       | 3:52:48  | 0.0  | y          | y      |
| 4005 | Gütersloh               | 5000      | 1.066            | 1.0       | 1.26      | 3         | 3         | 0.28      | 9:32:11  | 0.0  | y          | y      |
| 4006 | Soest                   | 5000      | 1.058            | 1.0       | 1.26      | 3         | 3         | 0.28      | 3:55:03  | 0.0  | y          | y      |
| 4007 | Dortmund                | 5000      | 1.078            | 1.0       | 1.26      | 3         | 3         | 0.27      | *        | *    | *          | *      |
| 4008 | Kassel                  | 5000      | 1.076            | 1.0       | 1.26      | 3         | 3         | 0.27      | 0:55:15  | 0.0  | y          | y      |
| 4009 | Hannover                | 5000      | 1.154            | 1.0       | 1.26      | 3         | 3         | 0.3       | 4:53:38  | 0.0  | y          | y      |
| 4010 | Krefeld                 | 5000      | 1.103            | 1.0       | 1.26      | 3         | 3         | 0.32      | *        | *    | *          | *      |
| 4011 | Münster                 | 5000      | 1.066            | 1.0       | 1.26      | 3         | 3         | 0.35      | 2:00:12  | 0.0  | y          | y      |
| 4012 | Paderborn               | 5000      | 1.052            | 1.0       | 1.26      | 3         | 3         | 0.34      | *        | *    | *          | *      |
| 4013 | Detmold                 | 5000      | 1.054            | 1.0       | 1.26      | 3         | 3         | 0.37      | 20:42:30 | 0.0  | y          | y      |
| 4014 | Bielefeld               | 5000      | 1.053            | 1.0       | 1.26      | 3         | 3         | 0.37      | 2:44:57  | 0.0  | y          | y      |
| 4015 | Gütersloh               | 5000      | 1.066            | 1.0       | 1.26      | 3         | 3         | 0.36      | 4:49:30  | 0.0  | y          | y      |
| 4016 | Soest                   | 5000      | 1.058            | 1.0       | 1.26      | 3         | 3         | 0.36      | 8:04:55  | 0.0  | y          | y      |
| 4017 | Dortmund                | 5000      | 1.078            | 1.0       | 1.26      | 3         | 3         | 0.37      | *        | *    | *          | *      |
| 4018 | Kassel                  | 5000      | 1.076            | 1.0       | 1.26      | 3         | 3         | 0.36      | *        | *    | *          | *      |
| 4019 | Hannover                | 5000      | 1.154            | 1.0       | 1.26      | 3         | 3         | 0.37      | 10:26:17 | 0.0  | y          | y      |
| 4020 | Krefeld                 | 5000      | 1.104            | 1.0       | 1.26      | 3         | 3         | 0.36      | *        | *    | *          | *      |
| 4021 | Münster                 | 5000      | 1.066            | 1.0       | 1.26      | 4         | 4         | 0.27      | 0:46:03  | 0.0  | y          | y      |
| 4022 | Paderborn               | 5000      | 1.052            | 1.0       | 1.26      | 4         | 4         | 0.27      | 2:47:26  | 0.0  | y          | y      |
| 4023 | Detmold                 | 5000      | 1.054            | 1.0       | 1.26      | 4         | 4         | 0.26      | 1:25:03  | 0.0  | y          | y      |
| 4024 | Bielefeld               | 5000      | 1.053            | 1.0       | 1.26      | 4         | 4         | 0.26      | 2:02:52  | 0.0  | y          | y      |
| 4025 | Gütersloh               | 5000      | 1.066            | 1.0       | 1.26      | 4         | 4         | 0.23      | 1:33:25  | 0.0  | y          | y      |
| 4026 | Soest                   | 5000      | 1.058            | 1.0       | 1.26      | 4         | 4         | 0.26      | 1:44:05  | 0.0  | y          | y      |
| 4027 | Dortmund                | 5000      | 1.077            | 1.0       | 1.26      | 4         | 4         | 0.24      | 2:36:16  | 0.0  | y          | y      |
| 4028 | Kassel                  | 5000      | 1.076            | 1.0       | 1.26      | 4         | 4         | 0.26      | 2:31:04  | 0.0  | y          | y      |
| 4029 | Hannover                | 5000      | 1.154            | 1.0       | 1.26      | 4         | 4         | 0.29      | 3:43:27  | 0.0  | y          | y      |
| 4030 | Krefeld                 | 5000      | 1.103            | 1.0       | 1.26      | 4         | 4         | 0.25      | 7:28:38  | 0.43 | y          | y      |
| 4031 | Münster                 | 5000      | 1.066            | 1.0       | 1.26      | 4         | 4         | 0.31      | *        | *    | *          | *      |
| 4032 | Paderborn               | 5000      | 1.052            | 1.0       | 1.26      | 4         | 4         | 0.3       | 8:19:09  | 0.0  | y          | y      |
| 4033 | Detmold                 | 5000      | 1.055            | 1.0       | 1.26      | 4         | 4         | 0.31      | 6:28:54  | 0.09 | y          | y      |
| 4034 | Bielefeld               | 5000      | 1.054            | 1.0       | 1.26      | 4         | 4         | 0.3       | 7:37:57  | 0.0  | y          | y      |
| 4035 | Gütersloh               | 5000      | 1.066            | 1.0       | 1.26      | 4         | 4         | 0.31      | *        | *    | *          | *      |
| 4036 | Soest                   | 5000      | 1.058            | 1.0       | 1.26      | 4         | 4         | 0.29      | 2:04:09  | 0.0  | y          | y      |
| 4037 | Dortmund                | 5000      | 1.078            | 1.0       | 1.26      | 4         | 4         | 0.28      | *        | *    | *          | *      |
| 4038 | Kassel                  | 5000      | 1.076            | 1.0       | 1.26      | 4         | 4         | 0.3       | 22:59:39 | 0.0  | y          | y      |
| 4039 | Hannover                | 5000      | 1.154            | 1.0       | 1.26      | 4         | 4         | 0.31      | 43:41:21 | 0.0  | y          | y      |
| 4040 | Krefeld                 | 5000      | 1.103            | 1.0       | 1.26      | 4         | 4         | 0.29      | *        | *    | *          | *      |
| 4041 | Münster                 | 5000      | 1.066            | 1.0       | 1.26      | 4         | 4         | 0.37      | 17:00:51 | 0.0  | y          | y      |

| #    | <i>cn</i> | Network characteristics |                 |           |           |           |           |           | Solution |     | Simulation |        |
|------|-----------|-------------------------|-----------------|-----------|-----------|-----------|-----------|-----------|----------|-----|------------|--------|
|      |           | <i>bu</i>               | $\frac{nl}{bu}$ | <i>lf</i> | <i>tr</i> | <i>lt</i> | <i>tt</i> | <i>as</i> | Time     | Gap | Volt       | Ampere |
| 4042 | Paderborn | 5000                    | 1.052           | 1.0       | 1.26      | 4         | 4         | 0.37      | *        | *   | *          | *      |
| 4043 | Detmold   | 5000                    | 1.054           | 1.0       | 1.26      | 4         | 4         | 0.39      | *        | *   | *          | *      |
| 4044 | Bielefeld | 5000                    | 1.054           | 1.0       | 1.26      | 4         | 4         | 0.38      | *        | *   | *          | *      |
| 4045 | Gütersloh | 5000                    | 1.066           | 1.0       | 1.26      | 4         | 4         | 0.37      | *        | *   | *          | *      |
| 4046 | Soest     | 5000                    | 1.058           | 1.0       | 1.26      | 4         | 4         | 0.37      | 4:38:52  | 0.0 | y          | y      |
| 4047 | Dortmund  | 5000                    | 1.078           | 1.0       | 1.26      | 4         | 4         | 0.38      | *        | *   | *          | *      |
| 4048 | Kassel    | 5000                    | 1.076           | 1.0       | 1.26      | 4         | 4         | 0.37      | *        | *   | *          | *      |
| 4049 | Hannover  | 5000                    | 1.154           | 1.0       | 1.26      | 4         | 4         | 0.38      | 17:27:50 | 0.1 | y          | y      |
| 4050 | Krefeld   | 5000                    | 1.103           | 1.0       | 1.26      | 4         | 4         | 0.39      | *        | *   | *          | *      |

\*: Timeout after 2 days

y: The simulation confirms compliance with the constraints

n: The simulation does not confirm compliance with the constraints
